# Supplementary material for: Identification of heat-tolerance QTLs and high-temperature stress-responsive genes through conventional QTL mapping, QTL-seq and RNA-seq in tomato
Source: BMC Plant Biol. 2019 Sep 11;19:398. doi: 10.1186/s12870-019-2008-3 (PMC6739936; doi:10.1186/s12870-019-2008-3)
Supplement: Supplementary file 8 — Table S8. The specific DEGs of LA2093 in RNA-seq. (XLSX 319 kb) (XLSX 319 kb) [file 12870_2019_2008_MOESM8_ESM.xlsx]

## Sheet: Sheet1
Gene ID	log2(LA2093_4/LA2093_0)	Qvalue(LA2093_0-vs-LA2093_4)	log2(LA1698_4/LA1698_0)	Qvalue(LA1698_0-vs-LA1698_4)	Gene Type	Start	End	Chr	LA1698_0_1 FPKM	LA1698_0_2 FPKM	LA1698_0_3 FPKM	LA1698_4_1 FPKM	LA1698_4_2 FPKM	LA1698_4_3 FPKM	LA2093_0_1 FPKM	LA2093_0_2 FPKM	LA2093_0_3 FPKM	LA2093_4_1 FPKM	LA2093_4_2 FPKM	LA2093_4_3 FPKM	log2(LA1698_4/LA1698_0)	Qvalue(LA1698_0-vs-LA1698_4)	Pvalue(LA1698_0-vs-LA1698_4)	log2(LA2093_4/LA2093_0)	Qvalue(LA2093_0-vs-LA2093_4)	Pvalue(LA2093_0-vs-LA2093_4)	GO	Kegg Orthology
BGI_novel_G000857	4.93261	1.03599e-186	0.59187	1.83328e-12	Novel_gene	8	2412	NW_004196558.1	2.59	1.75	2.08	1.6	3.33	4.88	0.21	0.08	0.1	2.53	4.85	5.22	0.59187	1.83328e-12	6.51241e-12	4.93261	1.03599e-186	1.8213e-186	GO:0043227//membrane-bounded organelle;GO:0043229//intracellular organelle;GO:0005623//cell;GO:0044464//cell part;GO:0005739//mitochondrion;GO:0043231//intracellular membrane-bounded organelle;GO:0044424//intracellular part;GO:0043226//organelle;GO:0005737//cytoplasm;GO:0005622//intracellular;GO:0044444//cytoplasmic part;GO:0003676//nucleic acid binding;GO:0005488//binding;GO:1901363//heterocycli…	K02706//photosystem II P680 reaction center D2 protein [EC:1.10.3.9]+ko01100//Metabolic pathways+ko00195//Photosynthesis
BGI_novel_G000839	4.51356	0.000110664	-1.54424	0.0582832	Novel_gene	65689628	65690168	NC_015449.2	0.27	0	0	0	0	0.1	0	0	0	0	1.01	0	-1.54424	0.0582832	0.319175	4.51356	0.000110664	0.000927321	GO:0009987//cellular process;GO:0050789//regulation of biological process;GO:0065007//biological regulation;GO:0050896//response to stimulus;GO:0007154//cell communication;GO:0051716//cellular response to stimulus;GO:0007165//signal transduction;GO:0023052//signaling;GO:0050794//regulation of cellular process;GO:0043168//anion binding;GO:0005488//binding;GO:0000166//nucleotide binding;GO:0043167/…	K19613//leucine-rich repeat protein SHOC2;K22038//volume-regulated anion channel
BGI_novel_G000823	2.37605	2.30431e-09	0.877226	0.0123597	Novel_gene	51640739	51641381	NC_015449.2	0.23	0.06	0.48	0.56	0.51	0.36	0.11	0.39	0.12	1.02	0.64	1.82	0.877226	0.0123597	0.0629172	2.37605	2.30431e-09	1.64283e-08	GO:0071704//organic substance metabolic process;GO:0006807//nitrogen compound metabolic process;GO:0008152//metabolic process;GO:0009451//RNA modification;GO:0006139//nucleobase-containing compound metabolic process;GO:1901360//organic cyclic compound metabolic process;GO:0046483//heterocycle metabolic process;GO:0006725//cellular aromatic compound metabolic process;GO:0043170//macromolecule meta…
BGI_novel_G000803	4.07009	9.78311e-139			Novel_gene	36323692	36330960	NC_015449.2	0	0	0.03	0	0	0	0.49	0.24	0.55	4.58	9.25	8.22				4.07009	9.78311e-139	2.13417e-138		K11320//E1A-binding protein p400 [EC:3.6.4.-]
BGI_novel_G000796	3.08105	4.05045e-33	0.46696	0.0289915	Novel_gene	21960391	21966779	NC_015449.2	0.05	0.05	0.12	0.13	0.07	0.1	0	0.03	0.13	0.17	0.55	0.63	0.46696	0.0289915	0.152619	3.08105	4.05045e-33	1.96772e-32
BGI_novel_G000795	3.23504	1.44179e-35	-0.297394	0.0773185	Novel_gene	21960391	21966779	NC_015449.2	0.1	0.08	0.02	0.08	0.02	0.06	0	0.05	0.08	0	1.18	0	-0.297394	0.0773185	0.430178	3.23504	1.44179e-35	6.8137e-35
BGI_novel_G000780	8.0794	7.69341e-29	-0.681664	0.0379306	Novel_gene	5811982	5817864	NC_015449.2	0.18	0	0.1	0	0	0.18	0	0	0	0.1	1.93	0	-0.681664	0.0379306	0.202243	8.0794	7.69341e-29	3.95879e-28		K22066//BolA-like protein 1
BGI_novel_G000771	2.32761	1.13395e-53			Novel_gene	56089861	56091247	NC_015448.2	0	0	0	0.02	0	0	0.62	0.64	0.92	4.07	3.28	3.61				2.32761	1.13395e-53	4.43139e-53	GO:0044260//cellular macromolecule metabolic process;GO:0006139//nucleobase-containing compound metabolic process;GO:0071704//organic substance metabolic process;GO:1901360//organic cyclic compound metabolic process;GO:0006807//nitrogen compound metabolic process;GO:0090304//nucleic acid metabolic process;GO:0015074//DNA integration;GO:0044237//cellular metabolic process;GO:0034641//cellular nitr…	K03515//DNA repair protein REV1 [EC:2.7.7.-];K11593//eukaryotic translation initiation factor 2C;K03006//DNA-directed RNA polymerase II subunit RPB1 [EC:2.7.7.6]+ko00230//Purine metabolism+ko03020//RNA polymerase+ko01100//Metabolic pathways+ko00240//Pyrimidine metabolism;K12447//UDP-sugar pyrophosphorylase [EC:2.7.7.64]+ko00520//Amino sugar and nucleotide sugar metabolism+ko00040//Pentose and glu…
BGI_novel_G000755	2.41942	3.60939e-34	0.666661	4.71013e-05	Novel_gene	38360439	38368837	NC_015448.2	0.45	0.94	1.1	0.94	1.77	1.3	0.15	0	1.08	1.9	2.2	2.37	0.666661	4.71013e-05	0.000206924	2.41942	3.60939e-34	1.73059e-33	GO:0016491//oxidoreductase activity;GO:0043167//ion binding;GO:0005488//binding;GO:0097159//organic cyclic compound binding;GO:0046906//tetrapyrrole binding;GO:0003824//catalytic activity;GO:1901363//heterocyclic compound binding;GO:0016705//oxidoreductase activity, acting on paired donors, with incorporation or reduction of molecular oxygen;GO:0004497//monooxygenase activity;GO:0046872//metal io…	K15747//beta-ring hydroxylase [EC:1.14.-.-]+ko00906//Carotenoid biosynthesis+ko01100//Metabolic pathways+ko01110//Biosynthesis of secondary metabolites
BGI_novel_G000732	7.9331	1.21965e-26			Novel_gene	10860206	10867618	NC_015448.2	0	0	0	0	0	0	0	0	0	0	2	0				7.9331	1.21965e-26	6.46092e-26		K01528//dynamin GTPase [EC:3.6.5.5]+ko04144//Endocytosis;K12447//UDP-sugar pyrophosphorylase [EC:2.7.7.64]+ko00520//Amino sugar and nucleotide sugar metabolism+ko00040//Pentose and glucuronate interconversions+ko01100//Metabolic pathways+ko00052//Galactose metabolism+ko00053//Ascorbate and aldarate metabolism
BGI_novel_G000718	2.93886	6.39392e-19	-0.544238	0.0839678	Novel_gene	1140811	1141526	NC_015448.2	0.15	0	0.29	0.05	0	0.27	0.15	0.4	0.16	2.35	1.41	1.76	-0.544238	0.0839678	0.469597	2.93886	6.39392e-19	3.77899e-18	GO:0031224//intrinsic component of membrane;GO:0016020//membrane;GO:0044425//membrane part;GO:0016021//integral component of membrane;	K19041//E3 ubiquitin-protein ligase RNF38/44 [EC:2.3.2.27]
BGI_novel_G000676	5.58395	1.08914e-07	-0.136569	0.00703255	Novel_gene	26478330	26479644	NC_015447.2	8.53	10.98	7.9	5.21	7.35	12.67	0	0	0	0.17	0.09	0.44	-0.136569	0.00703255	0.0349889	5.58395	1.08914e-07	8.13703e-07		K10527//enoyl-CoA hydratase/3-hydroxyacyl-CoA dehydrogenase [EC:4.2.1.17 1.1.1.35 1.1.1.211]+ko00592//alpha-Linolenic acid metabolism+ko01100//Metabolic pathways+ko01110//Biosynthesis of secondary metabolites+ko01212//Fatty acid metabolism+ko00071//Fatty acid degradation
BGI_novel_G000671	2.50327	2.22765e-08	-1.7625	0.0441915	Novel_gene	5692732	5692967	NC_015447.2	0.37	0.19	0.09	0.19	0	0	0.97	0.36	0.19	3.04	3.42	2.62	-1.7625	0.0441915	0.237691	2.50327	2.22765e-08	1.62924e-07		K03364//cell division cycle 20-like protein 1, cofactor of APC complex+ko04120//Ubiquitin mediated proteolysis
BGI_novel_G000670	3.99898	0.000827378			Novel_gene	4155274	4155513	NC_015447.2	0	0	0.17	0	0	0	0	0	0	0	0.21	1.6				3.99898	0.000827378	0.00727831
BGI_novel_G000668	2.13017	1.38967e-07			Novel_gene	3876348	3878056	NC_015447.2	0	0	0.09	0	0	0	0.12	0.2	0.01	0.57	0.3	0.58				2.13017	1.38967e-07	1.04219e-06	GO:0048584//positive regulation of response to stimulus;GO:0051704//multi-organism process;GO:0006955//immune response;GO:0050789//regulation of biological process;GO:0071229//cellular response to acid chemical;GO:0044237//cellular metabolic process;GO:0080134//regulation of response to stress;GO:0071310//cellular response to organic substance;GO:0002253//activation of immune response;GO:0070887/…	K14506//jasmonic acid-amino synthetase+ko04075//Plant hormone signal transduction
BGI_novel_G000664	3.22796	3.9361e-154	-0.269666	0.0971961	Novel_gene	71645709	71646676	NC_015446.2	0.12	0.13	0.55	0.28	0.19	0.2	1.68	1.08	0.81	11.7	8.72	14.08	-0.269666	0.0971961	0.550393	3.22796	3.9361e-154	7.90596e-154	GO:0008152//metabolic process;GO:0044550//secondary metabolite biosynthetic process;GO:0009058//biosynthetic process;GO:0019748//secondary metabolic process;GO:0016020//membrane;GO:0005506//iron ion binding;GO:0043167//ion binding;GO:0046872//metal ion binding;GO:0005488//binding;GO:0043169//cation binding;GO:0020037//heme binding;GO:0016705//oxidoreductase activity, acting on paired donors, with…	K20617//cytochrome P450 family 71 subfamily A;K00512//steroid 17alpha-monooxygenase / 17alpha-hydroxyprogesterone deacetylase [EC:1.14.14.19 1.14.14.32]+ko01100//Metabolic pathways;K07408//cytochrome P450 family 1 subfamily A polypeptide 1 [EC:1.14.14.1]+ko00380//Tryptophan metabolism+ko01100//Metabolic pathways
BGI_novel_G000662	2.50397	2.5985e-98	-0.467738	8.14836e-09	Novel_gene	71635903	71637621	NC_015446.2	3.16	5.74	5.49	2.73	2.53	5.3	0.86	0.93	1.02	6.06	5.47	4.25	-0.467738	8.14836e-09	3.14752e-08	2.50397	2.5985e-98	7.21956e-98	GO:0020037//heme binding;GO:0005488//binding;GO:0046906//tetrapyrrole binding;GO:0004497//monooxygenase activity;GO:0043169//cation binding;GO:0005506//iron ion binding;GO:0043167//ion binding;GO:0046914//transition metal ion binding;GO:0016705//oxidoreductase activity, acting on paired donors, with incorporation or reduction of molecular oxygen;GO:0016491//oxidoreductase activity;GO:1901363//het…	K20617//cytochrome P450 family 71 subfamily A
BGI_novel_G000659	5.06839	5.35115e-06	0.111114	0.150466	Novel_gene	69779194	69780471	NC_015446.2	0.4	0	0	0.21	0.21	0	0	0	0	0	0	1.18	0.111114	0.150466	0.884029	5.06839	5.35115e-06	4.23833e-05		K02218//casein kinase 1 [EC:2.7.11.1]
BGI_novel_G000656	5.67963	4.59049e-08			Novel_gene	67940391	67945160	NC_015446.2	0	0	0	0	0	0	0	0	0	0	0.57	0				5.67963	4.59049e-08	3.38872e-07		K08956//AFG3 family protein [EC:3.4.24.-]
BGI_novel_G000649	7.95252	6.37128e-27			Novel_gene	64220808	64224756	NC_015446.2	0	0	0	0	0	0.15	0	0	0	0.12	4.45	0				7.95252	6.37128e-27	3.36158e-26	GO:0010468//regulation of gene expression;GO:0034655//nucleobase-containing compound catabolic process;GO:0019222//regulation of metabolic process;GO:0044270//cellular nitrogen compound catabolic process;GO:0046700//heterocycle catabolic process;GO:1901361//organic cyclic compound catabolic process;GO:0006396//RNA processing;GO:0016071//mRNA metabolic process;GO:1901575//organic substance catabol…	K12623//U6 snRNA-associated Sm-like protein LSm4+ko03040//Spliceosome+ko03018//RNA degradation
BGI_novel_G000646	6.51356	2.09878e-12			Novel_gene	62128891	62130331	NC_015446.2	0	0	0	0	0.03	0.06	0	0	0	0.34	0.34	0.72				6.51356	2.09878e-12	1.39211e-11	GO:0097159//organic cyclic compound binding;GO:1901363//heterocyclic compound binding;GO:0005488//binding;GO:0003676//nucleic acid binding;	K18327//RNA exonuclease 4 [EC:3.1.-.-]
BGI_novel_G000620	8.54442	4.22967e-37	0.562847	0.00050691	Novel_gene	54165907	54170511	NC_015446.2	0.33	0.45	0.24	0.82	0.65	0	0	0	0	0	0.16	2.07	0.562847	0.00050691	0.00233469	8.54442	4.22967e-37	1.96407e-36	GO:0000785//chromatin;GO:0005622//intracellular;GO:0043229//intracellular organelle;GO:0044422//organelle part;GO:0043227//membrane-bounded organelle;GO:0005694//chromosome;GO:0044427//chromosomal part;GO:0032991//macromolecular complex;GO:0043232//intracellular non-membrane-bounded organelle;GO:0031224//intrinsic component of membrane;GO:0005623//cell;GO:0044425//membrane part;GO:0032993//protei…	K11253//histone H3
BGI_novel_G000575	4.36874	1.56603e-09			Novel_gene	60255749	60258428	NC_015445.2	0	0	0	0.11	0	0.2	0.07	0	0.05	0.98	0.25	1.56				4.36874	1.56603e-09	1.11024e-08	GO:0019748//secondary metabolic process;GO:0009058//biosynthetic process;GO:0044550//secondary metabolite biosynthetic process;GO:0008152//metabolic process;GO:0044425//membrane part;GO:0031224//intrinsic component of membrane;GO:0016021//integral component of membrane;GO:0016020//membrane;GO:0016491//oxidoreductase activity;GO:0046872//metal ion binding;GO:0043167//ion binding;GO:0020037//heme b…	K07418//cytochrome P450 family 2 subfamily J [EC:1.14.14.1]+ko00591//Linoleic acid metabolism+ko00590//Arachidonic acid metabolism+ko01100//Metabolic pathways;K00512//steroid 17alpha-monooxygenase / 17alpha-hydroxyprogesterone deacetylase [EC:1.14.14.19 1.14.14.32]+ko01100//Metabolic pathways
BGI_novel_G000563	2.03963	1.67909e-06			Novel_gene	56746782	56747600	NC_015445.2	0	0	0	0	0	0	0.18	0.43	0.28	0.94	1.49	1.37				2.03963	1.67909e-06	1.30488e-05	GO:0006396//RNA processing;GO:0016072//rRNA metabolic process;GO:0034470//ncRNA processing;GO:0071704//organic substance metabolic process;GO:0043170//macromolecule metabolic process;GO:1901360//organic cyclic compound metabolic process;GO:0031167//rRNA methylation;GO:0043412//macromolecule modification;GO:0043414//macromolecule methylation;GO:0000154//rRNA modification;GO:0046483//heterocycle me…	K14568//rRNA small subunit pseudouridine methyltransferase Nep1 [EC:2.1.1.260]+ko03008//Ribosome biogenesis in eukaryotes
BGI_novel_G000557	3.77636	9.55559e-70			Novel_gene	51875791	51880563	NC_015445.2	0	0	0	0	0	0	0	0	0.19	0.99	0.65	0.92				3.77636	9.55559e-70	3.24453e-69		K12447//UDP-sugar pyrophosphorylase [EC:2.7.7.64]+ko00520//Amino sugar and nucleotide sugar metabolism+ko00040//Pentose and glucuronate interconversions+ko01100//Metabolic pathways+ko00052//Galactose metabolism+ko00053//Ascorbate and aldarate metabolism;K03260//translation initiation factor 4G+ko03013//RNA transport;K03515//DNA repair protein REV1 [EC:2.7.7.-]
BGI_novel_G000556	3.40987	2.98275e-45			Novel_gene	51875768	51880563	NC_015445.2	0	0	0	0	0	0	0.13	0.04	0	0.72	0.69	0.4				3.40987	2.98275e-45	1.26492e-44		K12447//UDP-sugar pyrophosphorylase [EC:2.7.7.64]+ko00520//Amino sugar and nucleotide sugar metabolism+ko00040//Pentose and glucuronate interconversions+ko01100//Metabolic pathways+ko00052//Galactose metabolism+ko00053//Ascorbate and aldarate metabolism;K03515//DNA repair protein REV1 [EC:2.7.7.-]
BGI_novel_G000550	5.69402	6.49259e-14			Novel_gene	49675500	49676860	NC_015445.2	0	0	0	0	0.07	0	0	0.04	0	0.72	0.34	0.94				5.69402	6.49259e-14	4.18484e-13	GO:0043170//macromolecule metabolic process;GO:0006725//cellular aromatic compound metabolic process;GO:0071704//organic substance metabolic process;GO:0006139//nucleobase-containing compound metabolic process;GO:0009987//cellular process;GO:1901360//organic cyclic compound metabolic process;GO:0008152//metabolic process;GO:0046483//heterocycle metabolic process;GO:0006807//nitrogen compound meta…
BGI_novel_G000530	2.03215	4.07593e-20	-0.136153	0.0906717	Novel_gene	66708202	66709729	NC_015444.2	0.27	2.5	1.27	1.01	0.59	2.13	0	0.51	1.25	1.5	3.3	2.35	-0.136153	0.0906717	0.509234	2.03215	4.07593e-20	2.36616e-19		K20855//beta-1,3-galactosyltransferase 1/2/3/4/5/7/8 [EC:2.4.1.-]
BGI_novel_G000520	6.34665	2.32014e-11			Novel_gene	60631374	60639274	NC_015444.2	0	0	0	0.02	0.13	0.07	0	0	0	1.1	0.57	1.1				6.34665	2.32014e-11	1.57641e-10	GO:0016021//integral component of membrane;GO:0031224//intrinsic component of membrane;GO:0044425//membrane part;GO:0016020//membrane;GO:0016705//oxidoreductase activity, acting on paired donors, with incorporation or reduction of molecular oxygen;GO:0016491//oxidoreductase activity;GO:0004497//monooxygenase activity;GO:0046872//metal ion binding;GO:0043169//cation binding;GO:0046906//tetrapyrrol…	K07428//cytochrome P450 family 4 subfamily X [EC:1.14.14.1]
BGI_novel_G000513	3.91955	3.36738e-14			Novel_gene	56075138	56076032	NC_015444.2	0	0	0	0	0	0	0.04	0.12	0	1	0.44	1.04				3.91955	3.36738e-14	2.15949e-13
BGI_novel_G000443	5.8536	1.11569e-244	0.829221	0.0234185	Novel_gene	35713146	35716282	NC_015443.2	0	0.11	0.06	0.09	0.09	0.12	0.02	0	0.3	0.33	16.12	0.3	0.829221	0.0234185	0.122251	5.8536	1.11569e-244	1.56809e-244	GO:0005788//endoplasmic reticulum lumen;GO:0043226//organelle;GO:0070013//intracellular organelle lumen;GO:0043231//intracellular membrane-bounded organelle;GO:0044432//endoplasmic reticulum part;GO:0012505//endomembrane system;GO:0044444//cytoplasmic part;GO:0044446//intracellular organelle part;GO:0031974//membrane-enclosed lumen;GO:0005623//cell;GO:0043227//membrane-bounded organelle;GO:000562…	K09490//heat shock 70kDa protein 5+ko04141//Protein processing in endoplasmic reticulum+ko03060//Protein export
BGI_novel_G000434	2.35582	5.40194e-37			Novel_gene	24893089	24895105	NC_015443.2	0	0	0	0	0	0	0.28	0.42	0.44	1.05	3.37	1.38				2.35582	5.40194e-37	2.51317e-36		K03260//translation initiation factor 4G+ko03013//RNA transport;K19619//tyrosyl-DNA phosphodiesterase 2 [EC:3.1.4.-];K12447//UDP-sugar pyrophosphorylase [EC:2.7.7.64]+ko00520//Amino sugar and nucleotide sugar metabolism+ko00040//Pentose and glucuronate interconversions+ko01100//Metabolic pathways+ko00052//Galactose metabolism+ko00053//Ascorbate and aldarate metabolism
BGI_novel_G000433	2.15976	3.535e-190	0.399139	6.02307e-06	Novel_gene	24667248	24670268	NC_015443.2	1.72	2.23	2.04	2.43	1.85	3.7	1.39	1.92	2.61	6.01	9.46	11.66	0.399139	6.02307e-06	2.55148e-05	2.15976	3.535e-190	6.12493e-190	GO:1901576//organic substance biosynthetic process;GO:1903506//regulation of nucleic acid-templated transcription;GO:0050789//regulation of biological process;GO:0009987//cellular process;GO:0034654//nucleobase-containing compound biosynthetic process;GO:0044271//cellular nitrogen compound biosynthetic process;GO:0044260//cellular macromolecule metabolic process;GO:0019438//aromatic compound bios…	K14494//DELLA protein+ko04075//Plant hormone signal transduction
BGI_novel_G000396	5.07427	3.75908e-17			Novel_gene	55428334	55430307	NC_015442.2	0	0	0	0.03	0	0	0	0.05	0	0.03	1.6	0.15				5.07427	3.75908e-17	2.28614e-16	GO:0009056//catabolic process;GO:0008152//metabolic process;GO:0005623//cell;GO:0044444//cytoplasmic part;GO:0044464//cell part;GO:0005737//cytoplasm;GO:0005622//intracellular;GO:0044424//intracellular part;GO:0005829//cytosol;GO:0052689//carboxylic ester hydrolase activity;GO:0016788//hydrolase activity, acting on ester bonds;GO:0016787//hydrolase activity;GO:0003824//catalytic activity;	K20506//tuliposide A-converting enzyme [EC:4.2.99.22];K13258//2-hydroxyisoflavanone dehydratase [EC:4.2.1.105]+ko01110//Biosynthesis of secondary metabolites+ko00943//Isoflavonoid biosynthesis
BGI_novel_G000375	8.8576	6.21902e-44			Novel_gene	16034713	16038316	NC_015442.2	0	0	0	0	0	0	0	0	0	0	4.9	0				8.8576	6.21902e-44	2.67406e-43	GO:0016020//membrane;GO:0031224//intrinsic component of membrane;GO:0044425//membrane part;GO:0016021//integral component of membrane;GO:0046872//metal ion binding;GO:0070011//peptidase activity, acting on L-amino acid peptides;GO:0043167//ion binding;GO:0005488//binding;GO:0043169//cation binding;GO:0008236//serine-type peptidase activity;GO:0016787//hydrolase activity;GO:0008233//peptidase acti…	K09651//rhomboid domain-containing protein 1 [EC:3.4.21.-]
BGI_novel_G000364	7.70245	1.4803e-126	0.898896	0.0288847	Novel_gene	10442357	10448111	NC_015442.2	0.01	0	0.06	0	0	0.15	0	0	0.03	1.85	2.08	2.31	0.898896	0.0288847	0.152033	7.70245	1.4803e-126	3.44306e-126	GO:0000280//nuclear division;GO:0044085//cellular component biogenesis;GO:0044237//cellular metabolic process;GO:0006139//nucleobase-containing compound metabolic process;GO:0007127//meiosis I;GO:0009987//cellular process;GO:0048285//organelle fission;GO:0035825//homologous recombination;GO:0006310//DNA recombination;GO:0043170//macromolecule metabolic process;GO:0007129//synapsis;GO:0090304//nuc…	K17616//CTD small phosphatase-like protein 2 [EC:3.1.3.-]
BGI_novel_G000363	3.70993	2.25037e-90	-3.79722	0.00219221	Novel_gene	10441717	10448111	NC_015442.2	0	0	0.09	0	0	0	0.15	0.17	0.19	1.67	0.27	5.38	-3.79722	0.00219221	0.0104891	3.70993	2.25037e-90	6.54241e-90	GO:0098813//nuclear chromosome segregation;GO:0051026//chiasma assembly;GO:0140013//meiotic nuclear division;GO:0006996//organelle organization;GO:0070192//chromosome organization involved in meiotic cell cycle;GO:0034641//cellular nitrogen compound metabolic process;GO:0000280//nuclear division;GO:0045143//homologous chromosome segregation;GO:0006725//cellular aromatic compound metabolic process…	K17616//CTD small phosphatase-like protein 2 [EC:3.1.3.-]
BGI_novel_G000362	11.2038	1.13632e-151			Novel_gene	10441717	10448111	NC_015442.2	0	0	0	0	0	0	0	0	0	5.93	5.01	5.47				11.2038	1.13632e-151	2.32592e-151	GO:0035825//homologous recombination;GO:0051276//chromosome organization;GO:0034641//cellular nitrogen compound metabolic process;GO:0006725//cellular aromatic compound metabolic process;GO:0009987//cellular process;GO:1903046//meiotic cell cycle process;GO:0007049//cell cycle;GO:0022414//reproductive process;GO:0044085//cellular component biogenesis;GO:0090304//nucleic acid metabolic process;GO:…	K17616//CTD small phosphatase-like protein 2 [EC:3.1.3.-]
BGI_novel_G000340	3.11941	1.52293e-164	0.970182	3.322e-09	Novel_gene	65607550	65608879	NC_015441.2	0.98	1.19	1.21	1.91	1.5	3.32	1.12	1.47	1.3	7.68	12.3	15.1	0.970182	3.322e-09	1.27289e-08	3.11941	1.52293e-164	2.92568e-164	GO:0005623//cell;GO:0043226//organelle;GO:0005622//intracellular;GO:0043229//intracellular organelle;GO:0005634//nucleus;GO:0043227//membrane-bounded organelle;GO:0044464//cell part;GO:0043231//intracellular membrane-bounded organelle;GO:0044424//intracellular part;	K21777//G2/mitotic-specific cyclin-B, other
BGI_novel_G000330	4.21179	7.04788e-186	0.676172	0.00195054	Novel_gene	63752139	63754742	NC_015441.2	0	0	1.04	0.98	0	0.74	0.36	0.58	0.15	8.8	5.77	5.63	0.676172	0.00195054	0.00929153	4.21179	7.04788e-186	1.24378e-185	GO:0044238//primary metabolic process;GO:0071704//organic substance metabolic process;GO:0009056//catabolic process;GO:0016042//lipid catabolic process;GO:0006629//lipid metabolic process;GO:0008152//metabolic process;GO:1901575//organic substance catabolic process;GO:0003824//catalytic activity;GO:0016787//hydrolase activity;
BGI_novel_G000329	3.67288	1.80348e-64	0.96889	1.20423e-19	Novel_gene	63752139	63754704	NC_015441.2	0	3.65	1.2	5.54	1.06	2.78	0.12	0.13	0.26	3.61	0.98	1.74	0.96889	1.20423e-19	3.74504e-19	3.67288	1.80348e-64	6.40555e-64	GO:0071704//organic substance metabolic process;GO:0006629//lipid metabolic process;GO:1901575//organic substance catabolic process;GO:0016042//lipid catabolic process;GO:0008152//metabolic process;GO:0044238//primary metabolic process;GO:0009056//catabolic process;GO:0044464//cell part;GO:0005737//cytoplasm;GO:0005622//intracellular;GO:0016020//membrane;GO:0044424//intracellular part;GO:0005623/…
BGI_novel_G000300	5.71519	3.28485e-08			Novel_gene	31920706	31922405	NC_015441.2	0.04	0	0	0	0	0	0	0	0	0	1.16	0				5.71519	3.28485e-08	2.41604e-07
BGI_novel_G000293	2.79016	2.40279e-14	1.56809	0.00112945	Novel_gene	22861617	22863119	NC_015441.2	0	0.17	0.02	0.41	0	0.14	0	0.08	0.22	1.08	0.44	0.49	1.56809	0.00112945	0.00530289	2.79016	2.40279e-14	1.53729e-13	GO:0005622//intracellular;GO:0044444//cytoplasmic part;GO:0043227//membrane-bounded organelle;GO:0043229//intracellular organelle;GO:0043231//intracellular membrane-bounded organelle;GO:0005829//cytosol;GO:0005623//cell;GO:0044464//cell part;GO:0044424//intracellular part;GO:0005773//vacuole;GO:0043226//organelle;GO:0005737//cytoplasm;GO:0016790//thiolester hydrolase activity;GO:0016787//hydrolas…	K01074//palmitoyl-protein thioesterase [EC:3.1.2.22]+ko01100//Metabolic pathways+ko00062//Fatty acid elongation+ko01212//Fatty acid metabolism
BGI_novel_G000286	3.89207	3.51163e-05	0.57124	0.0212927	Novel_gene	7758564	7759195	NC_015441.2	0.34	0.17	0.99	0.34	0.64	1.35	0	0	0.06	0.31	0.52	0	0.57124	0.0212927	0.110715	3.89207	3.51163e-05	0.000287589	GO:1901566//organonitrogen compound biosynthetic process;GO:0043436//oxoacid metabolic process;GO:0016053//organic acid biosynthetic process;GO:0042558//pteridine-containing compound metabolic process;GO:0043604//amide biosynthetic process;GO:0044281//small molecule metabolic process;GO:0009058//biosynthetic process;GO:0009396//folic acid-containing compound biosynthetic process;GO:0042364//water…	K01633//7,8-dihydroneopterin aldolase/epimerase/oxygenase [EC:4.1.2.25 5.1.99.8 1.13.11.81]+ko01100//Metabolic pathways+ko00790//Folate biosynthesis
BGI_novel_G000266	3.57562	1.41835e-34			Novel_gene	3347042	3351088	NC_015441.2	0	0	0	0	0	0	0.09	0	0.28	1.04	1	2.47				3.57562	1.41835e-34	6.77709e-34	GO:0003723//RNA binding;GO:0005488//binding;GO:0003676//nucleic acid binding;GO:1901363//heterocyclic compound binding;GO:0097159//organic cyclic compound binding;
BGI_novel_G000263	4.67757	7.2431e-23	-3.21335	0.0178634	Novel_gene	2521313	2521724	NC_015441.2	0.09	0.09	0.14	0	0.03	0	0.2	0.14	0	0.31	8.48	0.13	-3.21335	0.0178634	0.0922254	4.67757	7.2431e-23	4.04429e-22	GO:0044425//membrane part;GO:0031224//intrinsic component of membrane;GO:0016021//integral component of membrane;GO:0016020//membrane;	K07393//glutathionyl-hydroquinone reductase [EC:1.8.5.7];K01193//beta-fructofuranosidase [EC:3.2.1.26]+ko01100//Metabolic pathways+ko00052//Galactose metabolism+ko00500//Starch and sucrose metabolism
BGI_novel_G000208	4.99898	8.29576e-06	4.04072	0.00108591	Novel_gene	17963143	17963543	NC_015440.2	0	0	0	0	0.39	0.41	0	0	0	0.31	1.09	0.14	4.04072	0.00108591	0.00509514	4.99898	8.29576e-06	6.61439e-05
BGI_novel_G000162	3.78166	1.69035e-104	3.99306	0.0012844	Novel_gene	47251949	47261125	NC_015439.2	0	0	0	0.11	0	0	0.12	0	0.46	2.49	1.92	3.72	3.99306	0.0012844	0.00604839	3.78166	1.69035e-104	4.50302e-104	GO:1901363//heterocyclic compound binding;GO:0003676//nucleic acid binding;GO:0005488//binding;GO:0097159//organic cyclic compound binding;	K08739//DNA mismatch repair protein MLH3+ko03430//Mismatch repair
BGI_novel_G000160	3.04407	3.19336e-14	1.4813	0.0028348	Novel_gene	47030544	47031502	NC_015439.2	0	0.19	0.07	0.22	0.15	0.35	0.04	0.07	0.23	0.12	2.34	0.25	1.4813	0.0028348	0.0136752	3.04407	3.19336e-14	2.0469e-13	GO:0055085//transmembrane transport;GO:0051179//localization;GO:0051234//establishment of localization;GO:0006810//transport;GO:0031224//intrinsic component of membrane;GO:0016021//integral component of membrane;GO:0016020//membrane;GO:0044425//membrane part;
BGI_novel_G000149	2.05374	4.86818e-119	0.936115	2.65086e-35	Novel_gene	43635985	43637498	NC_015439.2	4.39	4.31	4.51	4.73	8.29	12.65	2.04	2.67	2.44	9.41	11.03	9.36	0.936115	2.65086e-35	6.67021e-35	2.05374	4.86818e-119	1.19102e-118	GO:0016020//membrane;GO:0044425//membrane part;GO:0031224//intrinsic component of membrane;GO:0016021//integral component of membrane;
BGI_novel_G000143	2.38095	2.55864e-06	0.951746	0.0260064	Novel_gene	31325446	31327630	NC_015439.2	0.29	0	0.17	0	0.36	0.57	0	0.18	0.23	0	2.05	0	0.951746	0.0260064	0.136211	2.38095	2.55864e-06	2.00125e-05	GO:0005488//binding;GO:0046983//protein dimerization activity;GO:0005515//protein binding;	K11866//STAM-binding protein [EC:3.4.19.12]+ko04144//Endocytosis;K10398//kinesin family member 11
BGI_novel_G000096	2.2455	1.08988e-11			Novel_gene	88147390	88150734	NC_015438.2	0	0	0	0	0	0	0.21	0	0.23	0.36	0.33	1.55				2.2455	1.08988e-11	7.3499e-11		K09553//stress-induced-phosphoprotein 1
BGI_novel_G000095	2.35532	9.41377e-46	0.362653	0.0648621	Novel_gene	88144435	88150734	NC_015438.2	0.06	0.3	0.4	0.29	0.13	0.58	0.46	1.06	0.8	3.11	4.07	5.06	0.362653	0.0648621	0.357165	2.35532	9.41377e-46	3.97708e-45		K16365//small glutamine-rich tetratricopeptide repeat-containing protein alpha;K09553//stress-induced-phosphoprotein 1
BGI_novel_G000072	4.41968	0.000168045			Novel_gene	71737829	71741321	NC_015438.2	0	0	0	0	0	0	0	0	0	0.14	0	0				4.41968	0.000168045	0.00142033		K05275//pyridoxine 4-dehydrogenase [EC:1.1.1.65]+ko00750//Vitamin B6 metabolism+ko01100//Metabolic pathways
BGI_novel_G000026	4.64317	5.96739e-05			Novel_gene	3980337	3980558	NC_015438.2	0	0	0	0	0	0	0	0	0	1.84	0.11	0.62				4.64317	5.96739e-05	0.000493649		K19613//leucine-rich repeat protein SHOC2
BGI_novel_G000023	3.32665	1.33645e-110	-0.149532	0.0399436	Novel_gene	2159362	2165636	NC_015438.2	0.58	0.8	1.35	1.95	0.3	0.19	0	0	0.6	1.19	1.97	2.92	-0.149532	0.0399436	0.213426	3.32665	1.33645e-110	3.44124e-110	GO:0016020//membrane;GO:0016021//integral component of membrane;GO:0044425//membrane part;GO:0031224//intrinsic component of membrane;GO:0016740//transferase activity;GO:0036094//small molecule binding;GO:0030554//adenyl nucleotide binding;GO:0016773//phosphotransferase activity, alcohol group as acceptor;GO:0043168//anion binding;GO:1901363//heterocyclic compound binding;GO:0032555//purine ribon…	K04733//interleukin-1 receptor-associated kinase 4 [EC:2.7.11.1]
778307	4.19163	0.000419996	-0.248782	0.121284	Known_gene	65059948	65063481	NC_015441.2	0.06	0.19	0.09	0.13	0.16	0	0	0	0	0.13	0.07	0.09	-0.248782	0.121284	0.700501	4.19163	0.000419996	0.00363028	GO:0007275//multicellular organism development;GO:0032501//multicellular organismal process;GO:0061458//reproductive system development;GO:0003002//regionalization;GO:0010468//regulation of gene expression;GO:0000003//reproduction;GO:0022414//reproductive process;GO:0048608//reproductive structure development;GO:0009653//anatomical structure morphogenesis;GO:0048449//floral organ formation;GO:004…	K09264//MADS-box transcription factor, plant
606713	2.09852	0.000479881	0.27519	0.099171	Known_gene	41249613	41251081	NC_015443.2	0.27	0.17	0.13	0.1	0.14	0.46	0.03	0.1	0	0.11	0.08	0.47	0.27519	0.099171	0.562449	2.09852	0.000479881	0.00416008	GO:0009889//regulation of biosynthetic process;GO:0065007//biological regulation;GO:0031323//regulation of cellular metabolic process;GO:0010556//regulation of macromolecule biosynthetic process;GO:0080090//regulation of primary metabolic process;GO:0051252//regulation of RNA metabolic process;GO:0010468//regulation of gene expression;GO:2000112//regulation of cellular macromolecule biosynthetic …	K09286//EREBP-like factor
544313	2.31757	0	0.972645	3.44058e-167	Known_gene	60597122	60601381	NC_015440.2	13.3	17.77	17.64	33.1	22.14	37.88	8.48	8.55	12.18	45.08	40.72	50.93	0.972645	3.44058e-167	3.5581e-167	2.31757	0	0	GO:0044281//small molecule metabolic process;GO:0006536//glutamate metabolic process;GO:0019752//carboxylic acid metabolic process;GO:1901564//organonitrogen compound metabolic process;GO:0043648//dicarboxylic acid metabolic process;GO:0006520//cellular amino acid metabolic process;GO:0009987//cellular process;GO:0006082//organic acid metabolic process;GO:0008152//metabolic process;GO:0009064//gl…	K01580//glutamate decarboxylase [EC:4.1.1.15]+ko00410//beta-Alanine metabolism+ko00250//Alanine, aspartate and glutamate metabolism+ko00430//Taurine and hypotaurine metabolism+ko01100//Metabolic pathways+ko00650//Butanoate metabolism+ko01110//Biosynthesis of secondary metabolites;K01580//glutamate decarboxylase [EC:4.1.1.15]+ko00410//beta-Alanine metabolism+ko00250//Alanine, aspartate and glutama…
544259	2.2038	0	0.931431	0	Known_gene	31007764	31010331	NC_015443.2	330.77	264.76	327.74	642.61	513.05	617.42	188.55	133.15	141.39	767.99	562.63	843.9	0.931431	0	0	2.2038	0	0	GO:1901700//response to oxygen-containing compound;GO:0006801//superoxide metabolic process;GO:0006950//response to stress;GO:0009987//cellular process;GO:0071451//cellular response to superoxide;GO:0034599//cellular response to oxidative stress;GO:0010035//response to inorganic substance;GO:0055114//oxidation-reduction process;GO:0034614//cellular response to reactive oxygen species;GO:0072593//…	K04564//superoxide dismutase, Fe-Mn family [EC:1.15.1.1]+ko04146//Peroxisome;K04564//superoxide dismutase, Fe-Mn family [EC:1.15.1.1]+ko04146//Peroxisome
544251	2.27255	5.75216e-17	0.451793	0.00474436	Known_gene	55639668	55643253	NC_015445.2	0.46	0.53	0.2	0.66	0.48	0.47	0.03	0.1	0.22	0.4	0.72	0.58	0.451793	0.00474436	0.0233019	2.27255	5.75216e-17	3.50808e-16		K01115//phospholipase D1/2 [EC:3.1.4.4]+ko04144//Endocytosis+ko01100//Metabolic pathways+ko01110//Biosynthesis of secondary metabolites+ko00564//Glycerophospholipid metabolism+ko00565//Ether lipid metabolism
544230	2.84863	1.1522e-216	-0.500978	1.41107e-08	Known_gene	48581	52064	NC_015446.2	1.53	2.29	1.8	1.11	0.7	2.21	0.6	0.56	0.81	3.85	4.48	6.25	-0.500978	1.41107e-08	5.48633e-08	2.84863	1.1522e-216	1.78761e-216	GO:0016020//membrane;GO:0031224//intrinsic component of membrane;GO:0016021//integral component of membrane;GO:0044425//membrane part;	K10406//kinesin family member C2/C3;K19613//leucine-rich repeat protein SHOC2
544174	2.60667	7.82992e-10	-1.43321	0.00137958	Known_gene	90752113	90753498	NC_015438.2	0.08	0.22	0.37	0.06	0.06	0.15	0.06	0.17	0.03	0	1.49	0	-1.43321	0.00137958	0.00651366	2.60667	7.82992e-10	5.5085e-09	GO:0044238//primary metabolic process;GO:0010035//response to inorganic substance;GO:0005975//carbohydrate metabolic process;GO:0009987//cellular process;GO:0009266//response to temperature stimulus;GO:0001101//response to acid chemical;GO:1901701//cellular response to oxygen-containing compound;GO:0009269//response to desiccation;GO:0042221//response to chemical;GO:0007154//cell communication;GO…	K18819//inositol 3-alpha-galactosyltransferase [EC:2.4.1.123]+ko00052//Galactose metabolism
544090	3.99898	0.000827378			Known_gene	66430348	66432607	NC_015444.2	0	0	0	0	0	0.04	0	0	0	0	0.13	0				3.99898	0.000827378	0.00727831	GO:0000003//reproduction;GO:0009835//fruit ripening;GO:0021700//developmental maturation;GO:0007568//aging;GO:0050790//regulation of catalytic activity;GO:0042545//cell wall modification;GO:0048608//reproductive structure development;GO:0009056//catabolic process;GO:0005975//carbohydrate metabolic process;GO:0045229//external encapsulating structure organization;GO:0065007//biological regulation;…	K01051//pectinesterase [EC:3.1.1.11]+ko00040//Pentose and glucuronate interconversions+ko01100//Metabolic pathways
543979	2.22195	2.06369e-82	-0.187632	0.000196743	Known_gene	63882090	63883077	NC_015445.2	14.79	17.6	17.11	13.73	14.65	15.38	0.32	1.52	3.8	5.68	4.42	17.92	-0.187632	0.000196743	0.000886887	2.22195	2.06369e-82	6.34048e-82	GO:0006952//defense response;GO:0044419//interspecies interaction between organisms;GO:0050896//response to stimulus;GO:0031640//killing of cells of other organism;GO:0009620//response to fungus;GO:0009605//response to external stimulus;GO:0043207//response to external biotic stimulus;GO:0044364//disruption of cells of other organism;GO:0098542//defense response to other organism;GO:0001906//cell…	K04733//interleukin-1 receptor-associated kinase 4 [EC:2.7.11.1]
543959	2.21343	4.29226e-08	1.62569	0.00117612	Known_gene	58951963	58953404	NC_015444.2	0.09	0.03	0.08	0.2	0.26	0.16	0	0.29	0.03	0.4	0.84	0.24	1.62569	0.00117612	0.00552717	2.21343	4.29226e-08	3.16457e-07		K00430//peroxidase [EC:1.11.1.7]+ko01100//Metabolic pathways+ko01110//Biosynthesis of secondary metabolites+ko00940//Phenylpropanoid biosynthesis
543953	2.12361	1.34686e-37	-0.794216	2.9605e-15	Known_gene	63880240	63881332	NC_015445.2	10.96	14.6	10.53	8.51	8.15	4.14	0.21	2.88	2.28	4.73	3.59	17.54	-0.794216	2.9605e-15	9.92483e-15	2.12361	1.34686e-37	6.22213e-37	GO:0010466//negative regulation of peptidase activity;GO:0045861//negative regulation of proteolysis;GO:0052548//regulation of endopeptidase activity;GO:0010605//negative regulation of macromolecule metabolic process;GO:0051172//negative regulation of nitrogen compound metabolic process;GO:0009892//negative regulation of metabolic process;GO:0006950//response to stress;GO:0051346//negative regula…
543914	2.3108	3.27669e-49	0.913214	1.48307e-54	Known_gene	54305585	54306824	NC_015440.2	14.51	6.75	7.53	10.66	20.82	23.28	0.54	1.45	0.67	4.69	3.41	5.52	0.913214	1.48307e-54	3.08866e-54	2.3108	3.27669e-49	1.33767e-48	GO:0071704//organic substance metabolic process;GO:0071554//cell wall organization or biogenesis;GO:0006073//cellular glucan metabolic process;GO:0016043//cellular component organization;GO:0005975//carbohydrate metabolic process;GO:0042546//cell wall biogenesis;GO:0044262//cellular carbohydrate metabolic process;GO:0044085//cellular component biogenesis;GO:0009987//cellular process;GO:0010410//h…	K08235//xyloglucan:xyloglucosyl transferase [EC:2.4.1.207]
543891	2.15356	3.50553e-255	0.349991	5.15842e-08	Known_gene	95622236	95625145	NC_015438.2	4.39	4.15	5.25	4.53	4.82	8.46	2.4	3.24	3.53	4.36	30.29	5.16	0.349991	5.15842e-08	2.04137e-07	2.15356	3.50553e-255	4.7818e-255
543878	3.61987	8.29389e-41	-0.754455	4.30955e-06	Known_gene	63890935	63891909	NC_015445.2	0.78	3.43	2.04	1.63	0.93	1.14	0.25	0	0.38	1.63	1.68	4.86	-0.754455	4.30955e-06	1.81458e-05	3.61987	8.29389e-41	3.69502e-40		K04733//interleukin-1 receptor-associated kinase 4 [EC:2.7.11.1]
543847	4.89207	1.57118e-05	3.21065	0.00135976	Known_gene	48367504	48369176	NC_015439.2	0	0.03	0	0.12	0.03	0.13	0	0	0	0.1	0.34	0	3.21065	0.00135976	0.0064156	4.89207	1.57118e-05	0.000126721	GO:0048856//anatomical structure development;GO:0010154//fruit development;GO:0032502//developmental process;GO:0000003//reproduction;GO:0032501//multicellular organismal process;GO:0048731//system development;GO:0022414//reproductive process;GO:0003006//developmental process involved in reproduction;GO:0007275//multicellular organism development;GO:0048608//reproductive structure development;GO:…	K01870//isoleucyl-tRNA synthetase [EC:6.1.1.5]+ko00970//Aminoacyl-tRNA biosynthesis
543841	2.99898	1.19765e-08	-2.41871	0.00214184	Known_gene	63841364	63851203	NC_015444.2	0.21	0	0.11	0.03	0	0.03	0	0.09	0.06	1.02	0	0.13	-2.41871	0.00214184	0.0102416	2.99898	1.19765e-08	8.69479e-08	GO:0031323//regulation of cellular metabolic process;GO:0050794//regulation of cellular process;GO:0006355//regulation of transcription, DNA-templated;GO:0031326//regulation of cellular biosynthetic process;GO:0019219//regulation of nucleobase-containing compound metabolic process;GO:0050789//regulation of biological process;GO:1903506//regulation of nucleic acid-templated transcription;GO:005117…	K09264//MADS-box transcription factor, plant
543717	2.54527	2.63681e-16	-2.2812	0.0182636	Known_gene	75838535	75839728	NC_015438.2	0.1	0.1	0.05	0.05	0	0	0.26	0.5	0.16	1.51	0.92	3.41	-2.2812	0.0182636	0.0945226	2.54527	2.63681e-16	1.6275e-15
543692	2.19163	0.000275109	-0.444702	0.104462	Known_gene	64866761	64869245	NC_015441.2	0.1	0	0.02	0	0	0.09	0.02	0.03	0.02	0.04	0.27	0	-0.444702	0.104462	0.595991	2.19163	0.000275109	0.00235329		K16670//homeobox protein Meis2;K15613//homeobox protein Meis1
543625	2.46664	4.83863e-20	-0.651153	5.52051e-05	Known_gene	65487549	65489462	NC_015440.2	2.29	1.47	1.08	0.4	1.41	1.3	0.38	0.2	0.15	1.54	0.72	1.98	-0.651153	5.52051e-05	0.000243072	2.46664	4.83863e-20	2.81168e-19	GO:0071555//cell wall organization;GO:0071840//cellular component organization or biogenesis;GO:0009987//cellular process;GO:0071554//cell wall organization or biogenesis;GO:0016043//cellular component organization;GO:0071669//plant-type cell wall organization or biogenesis;GO:0009664//plant-type cell wall organization;GO:0045229//external encapsulating structure organization;GO:0005623//cell;GO:…	K20628//expansin
543603	3.30433	0	0.483008	6.79932e-32	Known_gene	66972887	66978633	NC_015440.2	4.75	8.16	6.63	10.29	4.85	12.33	1.67	2.85	5.25	26.61	27.32	44.54	0.483008	6.79932e-32	1.78042e-31	3.30433	0	0	GO:0042221//response to chemical;GO:0050896//response to stimulus;GO:0055114//oxidation-reduction process;GO:0098869//cellular oxidant detoxification;GO:0008152//metabolic process;GO:0009987//cellular process;GO:0098754//detoxification;GO:0009636//response to toxic substance;GO:1990748//cellular detoxification;GO:0044425//membrane part;GO:0016020//membrane;GO:0031224//intrinsic component of membr…	K13447//respiratory burst oxidase [EC:1.6.3.- 1.11.1.-]+ko04626//Plant-pathogen interaction+ko04016//MAPK signaling pathway - plant
543540	2.39137	1.13959e-278	0.509442	3.04853e-22	Known_gene	64116105	64116849	NC_015446.2	16.21	22.58	42.08	13.68	29.29	76.69	4.45	11.14	13.64	50.71	46.86	58.89	0.509442	3.04853e-22	9.07238e-22	2.39137	1.13959e-278	1.45597e-278	GO:0065008//regulation of biological quality;GO:0009719//response to endogenous stimulus;GO:0009755//hormone-mediated signaling pathway;GO:0071310//cellular response to organic substance;GO:0009415//response to water;GO:0010033//response to organic substance;GO:0090354//regulation of auxin metabolic process;GO:0048856//anatomical structure development;GO:0007275//multicellular organism developmen…	K14484//auxin-responsive protein IAA+ko04075//Plant hormone signal transduction
543528	2.23227	4.77575e-21	0.368299	0.0106009	Known_gene	61722	63814	NC_015448.2	0.76	0.43	0.82	0.95	0.87	0.78	0.3	0.22	0.19	0.97	1.16	1.27	0.368299	0.0106009	0.0536461	2.23227	4.77575e-21	2.73756e-20	GO:0006865//amino acid transport;GO:0046942//carboxylic acid transport;GO:0006811//ion transport;GO:1905039//carboxylic acid transmembrane transport;GO:0015711//organic anion transport;GO:0003333//amino acid transmembrane transport;GO:0071702//organic substance transport;GO:1903825//organic acid transmembrane transport;GO:0006820//anion transport;GO:0055085//transmembrane transport;GO:0051234//es…	K14209//solute carrier family 36 (proton-coupled amino acid transporter)
109121277	3.90862	3.18173e-05			Known_gene	43943362	43946499	NC_015447.2	0	0	0	0.04	0	0.02	0.01	0	0	0	0.18	0.02				3.90862	3.18173e-05	0.000260094		K08247//methionine S-methyltransferase [EC:2.1.1.12]+ko00450//Selenocompound metabolism;K01191//alpha-mannosidase [EC:3.2.1.24]+ko00511//Other glycan degradation;K15255//ATP-dependent DNA helicase PIF1 [EC:3.6.4.12];K10357//myosin V;K05666//ATP-binding cassette, subfamily C (CFTR/MRP), member 2+ko02010//ABC transporters
109121257	2.09852	0.000479881			Known_gene	28828165	28831529	NC_015447.2	0	0	0	0.06	0	0	0.12	0	0	0.06	0.1	0.4				2.09852	0.000479881	0.00416008		K07374//tubulin alpha+ko04145//Phagosome;K03006//DNA-directed RNA polymerase II subunit RPB1 [EC:2.7.7.6]+ko00230//Purine metabolism+ko03020//RNA polymerase+ko01100//Metabolic pathways+ko00240//Pyrimidine metabolism;K03549//KUP system potassium uptake protein;K07305//peptide-methionine (R)-S-oxide reductase [EC:1.8.4.12]
109121167	2.03585	6.65989e-116	0.998865	1.19257e-41	Known_gene	69593061	69594612	NC_015446.2	5.99	6.9	8.02	15.97	13.07	12.94	3.4	2.89	4.82	11.86	16.09	18.19	0.998865	1.19257e-41	2.80109e-41	2.03585	6.65989e-116	1.65867e-115		K11426//SET and MYND domain-containing protein;K00384//thioredoxin reductase (NADPH) [EC:1.8.1.9]+ko00450//Selenocompound metabolism;K11426//SET and MYND domain-containing protein;K00384//thioredoxin reductase (NADPH) [EC:1.8.1.9]+ko00450//Selenocompound metabolism
109120911	3.36155	0.000493037			Known_gene	58974218	58975154	NC_015445.2	0	0	0	0	0.06	0	0	0	0.06	0.18	0.19	0.24				3.36155	0.000493037	0.00427847		K12882//nuclear cap-binding protein subunit 1+ko03040//Spliceosome+ko03015//mRNA surveillance pathway+ko03013//RNA transport;K20093//DNA excision repair protein ERCC-6-like [EC:3.6.4.12];K02259//cytochrome c oxidase assembly protein subunit 15+ko00860//Porphyrin and chlorophyll metabolism+ko01100//Metabolic pathways+ko00190//Oxidative phosphorylation+ko01110//Biosynthesis of secondary metabolites…
109120901	2.04063	0.000663136	0.0407248	0.164879	Known_gene	51772328	51773077	NC_015445.2	0	0	0.05	0	0	0.05	0.1	0.05	0.05	0	0.77	0	0.0407248	0.164879	0.984074	2.04063	0.000663136	0.00579986		K13420//LRR receptor-like serine/threonine-protein kinase FLS2 [EC:2.7.11.1]+ko04626//Plant-pathogen interaction+ko04016//MAPK signaling pathway - plant;K12447//UDP-sugar pyrophosphorylase [EC:2.7.7.64]+ko00520//Amino sugar and nucleotide sugar metabolism+ko00040//Pentose and glucuronate interconversions+ko01100//Metabolic pathways+ko00052//Galactose metabolism+ko00053//Ascorbate and aldarate met…
109120881	4.51356	0.000110664	4.04072	0.00108591	Known_gene	36325649	36328080	NC_015445.2	0	0	0	0.12	0.09	0.03	0	0	0	0.03	0.27	0.04	4.04072	0.00108591	0.00509514	4.51356	0.000110664	0.000927321		K13420//LRR receptor-like serine/threonine-protein kinase FLS2 [EC:2.7.11.1]+ko04626//Plant-pathogen interaction+ko04016//MAPK signaling pathway - plant;K12447//UDP-sugar pyrophosphorylase [EC:2.7.7.64]+ko00520//Amino sugar and nucleotide sugar metabolism+ko00040//Pentose and glucuronate interconversions+ko01100//Metabolic pathways+ko00052//Galactose metabolism+ko00053//Ascorbate and aldarate met…
109120864	4.67448	5.10107e-05	3.42754	0.00657202	Known_gene	13370419	13373685	NC_015445.2	0	0	0	0.12	0	0.17	0	0	0	0.12	0.12	0.54	3.42754	0.00657202	0.032647	4.67448	5.10107e-05	0.000420689		K07305//peptide-methionine (R)-S-oxide reductase [EC:1.8.4.12];K12447//UDP-sugar pyrophosphorylase [EC:2.7.7.64]+ko00520//Amino sugar and nucleotide sugar metabolism+ko00040//Pentose and glucuronate interconversions+ko01100//Metabolic pathways+ko00052//Galactose metabolism+ko00053//Ascorbate and aldarate metabolism;K14833//nucleolar complex protein 2;K01592//tyrosine decarboxylase [EC:4.1.1.25]+k…
109120471	3.41402	5.34249e-08	1.59531	0.00811702	Known_gene	34948960	34950226	NC_015443.2	0	0	0.12	0.15	0.05	0.16	0.06	0	0.03	0.16	0.73	0.09	1.59531	0.00811702	0.0406188	3.41402	5.34249e-08	3.94965e-07		K13420//LRR receptor-like serine/threonine-protein kinase FLS2 [EC:2.7.11.1]+ko04626//Plant-pathogen interaction+ko04016//MAPK signaling pathway - plant;K12447//UDP-sugar pyrophosphorylase [EC:2.7.7.64]+ko00520//Amino sugar and nucleotide sugar metabolism+ko00040//Pentose and glucuronate interconversions+ko01100//Metabolic pathways+ko00052//Galactose metabolism+ko00053//Ascorbate and aldarate met…
109120446	5.81397	1.25116e-08			Known_gene	19346529	19347077	NC_015443.2	0	0	0	0	0.07	0.22	0	0	0	0.54	1.06	0.29				5.81397	1.25116e-08	9.08912e-08		K03006//DNA-directed RNA polymerase II subunit RPB1 [EC:2.7.7.6]+ko00230//Purine metabolism+ko03020//RNA polymerase+ko01100//Metabolic pathways+ko00240//Pyrimidine metabolism;K07374//tubulin alpha+ko04145//Phagosome;K03549//KUP system potassium uptake protein;K20093//DNA excision repair protein ERCC-6-like [EC:3.6.4.12];K07305//peptide-methionine (R)-S-oxide reductase [EC:1.8.4.12]
109120297	2.14791	3.12596e-94	-0.220132	3.69282e-05	Known_gene	54480928	54484456	NC_015442.2	11.12	12.22	11.29	9.25	8.99	11.8	2.02	1.72	1.4	7.68	6.41	9.28	-0.220132	3.69282e-05	0.000161348	2.14791	3.12596e-94	8.9035e-94
109120277	4.51356	0.000110664	1.04072	0.096168	Known_gene	27477227	27477794	NC_015442.2	0.06	0	0	0.13	0	0	0	0	0	0.28	0.29	0.18	1.04072	0.096168	0.544095	4.51356	0.000110664	0.000927321		K08247//methionine S-methyltransferase [EC:2.1.1.12]+ko00450//Selenocompound metabolism;K10357//myosin V;K14638//solute carrier family 15 (peptide/histidine transporter), member 3/4;K15156//mediator of RNA polymerase II transcription subunit 14;K13457//disease resistance protein RPM1+ko04626//Plant-pathogen interaction
109120270	5.19163	2.34805e-06			Known_gene	21730481	21753993	NC_015442.2	0	0	0	0	0.11	0.06	0	0	0	0.46	0.18	0.38				5.19163	2.34805e-06	1.83435e-05		K11446//histone demethylase JARID1 [EC:1.14.11.-];K13336//peroxin-3+ko04146//Peroxisome;K04733//interleukin-1 receptor-associated kinase 4 [EC:2.7.11.1];K00963//UTP--glucose-1-phosphate uridylyltransferase [EC:2.7.7.9]+ko00520//Amino sugar and nucleotide sugar metabolism+ko00040//Pentose and glucuronate interconversions+ko01100//Metabolic pathways+ko00052//Galactose metabolism+ko00500//Starch and…
109120264	3.27909	1.27422e-05	2.36265	0.00296548	Known_gene	12611367	12613187	NC_015442.2	0	0.03	0.02	0.15	0.03	0.08	0	0.05	0	0.16	0.14	0.21	2.36265	0.00296548	0.0143252	3.27909	1.27422e-05	0.000102249		K03327//multidrug resistance protein, MATE family;K12447//UDP-sugar pyrophosphorylase [EC:2.7.7.64]+ko00520//Amino sugar and nucleotide sugar metabolism+ko00040//Pentose and glucuronate interconversions+ko01100//Metabolic pathways+ko00052//Galactose metabolism+ko00053//Ascorbate and aldarate metabolism;K03517//quinolinate synthase [EC:2.5.1.72]+ko01100//Metabolic pathways+ko00760//Nicotinate and …
109120241	2.45312	3.37373e-83	0.890584	9.1202e-12	Known_gene	59961826	59966259	NC_015442.2	0.49	0.29	0.5	0.99	0.57	0.85	0.31	0.36	0.24	1.33	1.88	1.85	0.890584	9.1202e-12	3.28242e-11	2.45312	3.37373e-83	1.03253e-82
109120150	4.36155	0.000214959	3.36265	0.00765004	Known_gene	60815300	60816544	NC_015441.2	0	0	0	0.11	0	0.03	0	0	0	0.18	0.06	0.04	3.36265	0.00765004	0.0382168	4.36155	0.000214959	0.00182716		K03006//DNA-directed RNA polymerase II subunit RPB1 [EC:2.7.7.6]+ko00230//Purine metabolism+ko03020//RNA polymerase+ko01100//Metabolic pathways+ko00240//Pyrimidine metabolism
109120148	4.28755	0.000290296			Known_gene	60042695	60044295	NC_015441.2	0	0.06	0	0	0	0	0	0	0	0	0.2	0				4.28755	0.000290296	0.00248592		K13420//LRR receptor-like serine/threonine-protein kinase FLS2 [EC:2.7.11.1]+ko04626//Plant-pathogen interaction+ko04016//MAPK signaling pathway - plant
109120009	4.1421	1.69433e-09			Known_gene	5137196	5141977	NC_015441.2	0	0	0	0	0	0	0	0	0.07	0.23	0.67	0.22				4.1421	1.69433e-09	1.20252e-08		K04733//interleukin-1 receptor-associated kinase 4 [EC:2.7.11.1];K13420//LRR receptor-like serine/threonine-protein kinase FLS2 [EC:2.7.11.1]+ko04626//Plant-pathogen interaction+ko04016//MAPK signaling pathway - plant
109119810	3.31448	1.05193e-13	-2.18115	0.00533542	Known_gene	5744965	5745696	NC_015440.2	0.15	0.03	0.27	0	0.1	0	0.02	0.23	0.07	0	3.18	0	-2.18115	0.00533542	0.0262826	3.31448	1.05193e-13	6.80642e-13		K20254//perilipin-4
109119756	4.11192	0.000561469	-3.41608	0.0062835	Known_gene	69393926	69394829	NC_015440.2	0	0	0.33	0	0	0	0	0	0	0	0.53	0	-3.41608	0.0062835	0.031143	4.11192	0.000561469	0.00489032		K09250//cellular nucleic acid-binding protein
109119737	4.36155	0.000214959			Known_gene	54179987	54181695	NC_015440.2	0	0	0	0.03	0	0	0	0	0	0.04	0.24	0.1				4.36155	0.000214959	0.00182716		K01213//galacturan 1,4-alpha-galacturonidase [EC:3.2.1.67]+ko00040//Pentose and glucuronate interconversions+ko01100//Metabolic pathways;K09250//cellular nucleic acid-binding protein
109119563	4.41814	0.000169149	2.11569	0.00210786	Known_gene	29362428	29363320	NC_015438.2	0	0	0.14	0	0.3	0.36	0	0	0	0.16	0	0.45	2.11569	0.00210786	0.0100716	4.41814	0.000169149	0.00143001		K07305//peptide-methionine (R)-S-oxide reductase [EC:1.8.4.12];K16296//serine carboxypeptidase-like clade I [EC:3.4.16.-];K12447//UDP-sugar pyrophosphorylase [EC:2.7.7.64]+ko00520//Amino sugar and nucleotide sugar metabolism+ko00040//Pentose and glucuronate interconversions+ko01100//Metabolic pathways+ko00052//Galactose metabolism+ko00053//Ascorbate and aldarate metabolism;K01592//tyrosine decarb…
109119491	4.19163	0.000419996	3.36265	0.00765004	Known_gene	42747886	42750157	NC_015439.2	0	0	0	0.04	0	0.07	0	0	0	0.05	0.14	0	3.36265	0.00765004	0.0382168	4.19163	0.000419996	0.00363028		K12447//UDP-sugar pyrophosphorylase [EC:2.7.7.64]+ko00520//Amino sugar and nucleotide sugar metabolism+ko00040//Pentose and glucuronate interconversions+ko01100//Metabolic pathways+ko00052//Galactose metabolism+ko00053//Ascorbate and aldarate metabolism;K03517//quinolinate synthase [EC:2.5.1.72]+ko01100//Metabolic pathways+ko00760//Nicotinate and nicotinamide metabolism;K07739//elongator complex …
109119483	3.65106	0.000131291	1.62569	0.0039086	Known_gene	36474451	36480648	NC_015439.2	0.02	0.04	0.04	0	0.08	0.23	0	0	0.02	0.08	0.07	0.11	1.62569	0.0039086	0.0190294	3.65106	0.000131291	0.00110417		K04733//interleukin-1 receptor-associated kinase 4 [EC:2.7.11.1];K20000//maturase K;K01657//anthranilate synthase component I [EC:4.1.3.27]+ko01230//Biosynthesis of amino acids+ko01100//Metabolic pathways+ko01110//Biosynthesis of secondary metabolites+ko00400//Phenylalanine, tyrosine and tryptophan biosynthesis
109119472	4.51356	0.000110664			Known_gene	30709819	30710853	NC_015439.2	0	0	0	0.07	0	0.07	0	0	0	0.14	0.19	0.05				4.51356	0.000110664	0.000927321		K07305//peptide-methionine (R)-S-oxide reductase [EC:1.8.4.12];K13420//LRR receptor-like serine/threonine-protein kinase FLS2 [EC:2.7.11.1]+ko04626//Plant-pathogen interaction+ko04016//MAPK signaling pathway - plant;K03549//KUP system potassium uptake protein;K12447//UDP-sugar pyrophosphorylase [EC:2.7.7.64]+ko00520//Amino sugar and nucleotide sugar metabolism+ko00040//Pentose and glucuronate int…
109119448	3.72519	2.4541e-07			Known_gene	7187378	7187947	NC_015439.2	0	0	0	0	0.13	0.07	0	0.06	0.07	0.34	1.33	0				3.72519	2.4541e-07	1.85621e-06		K01904//4-coumarate--CoA ligase [EC:6.2.1.12]+ko00130//Ubiquinone and other terpenoid-quinone biosynthesis+ko01100//Metabolic pathways+ko01110//Biosynthesis of secondary metabolites+ko00940//Phenylpropanoid biosynthesis+ko00360//Phenylalanine metabolism;K03006//DNA-directed RNA polymerase II subunit RPB1 [EC:2.7.7.6]+ko00230//Purine metabolism+ko03020//RNA polymerase+ko01100//Metabolic pathways+k…
109119262	4.65106	5.73687e-05			Known_gene	275431	277086	NW_004194389.1	0	0	0	0	0	0.07	0	0	0	0.26	0.28	0.26				4.65106	5.73687e-05	0.000474283		K01191//alpha-mannosidase [EC:3.2.1.24]+ko00511//Other glycan degradation;K15255//ATP-dependent DNA helicase PIF1 [EC:3.6.4.12];K05666//ATP-binding cassette, subfamily C (CFTR/MRP), member 2+ko02010//ABC transporters;K02537//mitotic spindle assembly checkpoint protein MAD2;K10999//cellulose synthase A [EC:2.4.1.12]
109119065	3.19163	0.000954873	0.77769	0.0811466	Known_gene	9169342	9169859	NC_015449.2	0.14	0	0.07	0.07	0	0.31	0	0	0.08	0.08	0.41	0.2	0.77769	0.0811466	0.45315	3.19163	0.000954873	0.00844485		K01426//amidase [EC:3.5.1.4]+ko00380//Tryptophan metabolism+ko00330//Arginine and proline metabolism+ko00360//Phenylalanine metabolism;K18666//activating signal cointegrator complex subunit 1;K01051//pectinesterase [EC:3.1.1.11]+ko00040//Pentose and glucuronate interconversions+ko01100//Metabolic pathways;K03327//multidrug resistance protein, MATE family;K03006//DNA-directed RNA polymerase II sub…
109119046	2.1551	3.43766e-07	0.593266	0.0155335	Known_gene	41761513	41762459	NC_015449.2	0.33	0.45	0.32	0.48	0.6	0.59	0.07	0.22	0.08	0.24	1.04	0.41	0.593266	0.0155335	0.0796415	2.1551	3.43766e-07	2.6119e-06
109118870	2.69413	4.99122e-05	1.62569	0.00213525	Known_gene	23444061	23444531	NC_015448.2	0.11	0.11	0.41	0.44	0.76	0.82	0.11	0.21	0	0.93	0.99	0.16	1.62569	0.00213525	0.010206	2.69413	4.99122e-05	0.000411423		K02261//cytochrome c oxidase subunit 2+ko01100//Metabolic pathways+ko00190//Oxidative phosphorylation
109118734	4.17652	2.43773e-24	-0.611352	0.0679221	Known_gene	40896308	40898224	NC_015439.2	0.13	0.16	0	0.03	0.03	0.14	0.03	0.03	0.11	0.3	0.64	2.23	-0.611352	0.0679221	0.374724	4.17652	2.43773e-24	1.33376e-23		K05278//flavonol synthase [EC:1.14.11.23]+ko01100//Metabolic pathways+ko01110//Biosynthesis of secondary metabolites+ko00941//Flavonoid biosynthesis;K04124//gibberellin 3-beta-dioxygenase [EC:1.14.11.15]+ko00904//Diterpenoid biosynthesis+ko01110//Biosynthesis of secondary metabolites;K06892//feruloyl-CoA ortho-hydroxylase [EC:1.14.11.-]+ko01110//Biosynthesis of secondary metabolites+ko00940//Phen…
109118720	2.34094	4.49509e-132	0.995656	1.29493e-30	Known_gene	49976295	49981419	NC_015439.2	1.07	1.17	1.29	2.69	1.8	2.58	0.6	0.67	0.72	2.07	7.11	0.93	0.995656	1.29493e-30	3.4364e-30	2.34094	4.49509e-132	1.0169e-131	GO:0016070//RNA metabolic process;GO:0071704//organic substance metabolic process;GO:0044260//cellular macromolecule metabolic process;GO:0006807//nitrogen compound metabolic process;GO:0006139//nucleobase-containing compound metabolic process;GO:0046483//heterocycle metabolic process;GO:0009987//cellular process;GO:0043170//macromolecule metabolic process;GO:1901360//organic cyclic compound meta…	K09955//uncharacterized protein;K03798//cell division protease FtsH [EC:3.4.24.-]
109118706	4.89207	1.57118e-05			Known_gene	35675930	35676943	NC_015439.2	0	0	0	0	0.03	0.04	0	0	0	0.15	0.27	0.1				4.89207	1.57118e-05	0.000126721
109118697	4.25772	4.74898e-18	1.04072	0.096168	Known_gene	55433657	55436423	NC_015440.2	0.01	0	0	0.01	0.01	0	0	0	0.05	0.18	0.54	0.22	1.04072	0.096168	0.544095	4.25772	4.74898e-18	2.8444e-17		K11420//euchromatic histone-lysine N-methyltransferase [EC:2.1.1.43]+ko00310//Lysine degradation
109118694	8.13414	1.04007e-29	1.36265	0.00793234	Known_gene	2843043	2844061	NC_015445.2	0.14	0	0.07	0.14	0.07	0.33	0	0	0	0.07	4.59	0.1	1.36265	0.00793234	0.0396663	8.13414	1.04007e-29	5.2932e-29		K00059//3-oxoacyl-[acyl-carrier protein] reductase [EC:1.1.1.100]+ko01100//Metabolic pathways+ko00061//Fatty acid biosynthesis+ko01212//Fatty acid metabolism+ko00780//Biotin metabolism+ko01040//Biosynthesis of unsaturated fatty acids
108511945	2.48723	1.14639e-215	0.894668	8.36002e-55	Known_gene	54945335	54946190	NC_015440.2	8.67	12.91	16.39	18.91	25.2	27.52	2.53	3.19	6.98	28.19	15.33	28.2	0.894668	8.36002e-55	1.73716e-54	2.48723	1.14639e-215	1.78927e-215		K09286//EREBP-like factor
104649781	5.15972	2.92267e-06			Known_gene	36527593	36530947	NC_015447.2	0	0	0	0	0	0	0	0	0	0	0.19	0				5.15972	2.92267e-06	2.29219e-05		K14638//solute carrier family 15 (peptide/histidine transporter), member 3/4;K13457//disease resistance protein RPM1+ko04626//Plant-pathogen interaction;K03469//ribonuclease HI [EC:3.1.26.4]+ko03030//DNA replication;K08247//methionine S-methyltransferase [EC:2.1.1.12]+ko00450//Selenocompound metabolism
104649649	3.05413	5.40579e-17	0.896989	2.37383e-05	Known_gene	47806492	47810280	NC_015447.2	0.42	0.4	0.66	1.37	0.26	0.83	0.03	0.13	0.21	1.15	0.67	1.13	0.896989	2.37383e-05	0.000102772	3.05413	5.40579e-17	3.29516e-16		K08237//hydroquinone glucosyltransferase [EC:2.4.1.218];K12447//UDP-sugar pyrophosphorylase [EC:2.7.7.64]+ko00520//Amino sugar and nucleotide sugar metabolism+ko00040//Pentose and glucuronate interconversions+ko01100//Metabolic pathways+ko00052//Galactose metabolism+ko00053//Ascorbate and aldarate metabolism;K03260//translation initiation factor 4G+ko03013//RNA transport;K03515//DNA repair protei…
104649492	2.65106	8.49243e-06			Known_gene	749205	752619	NC_015447.2	0	0	0	0	0	0	0.03	0	0.04	0.04	0.39	0				2.65106	8.49243e-06	6.77384e-05		K14398//cleavage and polyadenylation specificity factor subunit 6/7+ko03015//mRNA surveillance pathway
104649441	3.34635	0	0.263117	0.0270573	Known_gene	71933339	71940999	NC_015446.2	0.9	1.3	0.88	1.19	0.84	0.97	1.61	1.92	2.36	20.16	13.2	21.22	0.263117	0.0270573	0.142028	3.34635	0	0	GO:0008152//metabolic process;GO:0019748//secondary metabolic process;GO:0009058//biosynthetic process;GO:0044550//secondary metabolite biosynthetic process;GO:0016020//membrane;GO:0016705//oxidoreductase activity, acting on paired donors, with incorporation or reduction of molecular oxygen;GO:0016491//oxidoreductase activity;GO:0016709//oxidoreductase activity, acting on paired donors, with inco…	K20556//cytochrome P450 family 76 subfamily C;K20513//ferruginol synthase [EC:1.14.13.190];K20556//cytochrome P450 family 76 subfamily C;K20556//cytochrome P450 family 76 subfamily C
104649310	6.51608	2.02082e-12			Known_gene	58628630	58630441	NC_015446.2	0	0	0	0	0.04	0	0	0	0	0	0.89	0				6.51608	2.02082e-12	1.33957e-11		K03469//ribonuclease HI [EC:3.1.26.4]+ko03030//DNA replication;K07478//putative ATPase;K17541//SCY1-like protein 2
104649297	3.77659	6.7797e-05	1.62569	0.0540263	Known_gene	55048890	55051288	NC_015446.2	0	0	0.05	0	0.15	0	0	0.05	0	0.26	0.17	0.28	1.62569	0.0540263	0.294318	3.77659	6.7797e-05	0.000562812		K03549//KUP system potassium uptake protein;K14560//U3 small nucleolar ribonucleoprotein protein IMP3+ko03008//Ribosome biogenesis in eukaryotes;K07305//peptide-methionine (R)-S-oxide reductase [EC:1.8.4.12];K01265//methionyl aminopeptidase [EC:3.4.11.18]
104649198	4.77659	2.90194e-08			Known_gene	35365945	35369002	NC_015446.2	0	0	0	0	0	0	0	0	0.05	0.54	0.34	0.3				4.77659	2.90194e-08	2.1311e-07		K05666//ATP-binding cassette, subfamily C (CFTR/MRP), member 2+ko02010//ABC transporters;K01191//alpha-mannosidase [EC:3.2.1.24]+ko00511//Other glycan degradation;K14513//ethylene-insensitive protein 2+ko04016//MAPK signaling pathway - plant+ko04075//Plant hormone signal transduction;K15255//ATP-dependent DNA helicase PIF1 [EC:3.6.4.12];K08247//methionine S-methyltransferase [EC:2.1.1.12]+ko00450…
104649135	4.89207	1.57118e-05	1.26312	0.0348166	Known_gene	2181098	2181577	NC_015446.2	0.23	0	0	0.39	0.16	0	0	0	0	0.34	0.35	0.55	1.26312	0.0348166	0.185055	4.89207	1.57118e-05	0.000126721
104649119	4.20918	7.30638e-49	1.73705	0.0119032	Known_gene	8051252	8052781	NC_015446.2	0.16	0	0	0.27	0.27	0	0.34	0.16	0.27	4.12	3.28	7.61	1.73705	0.0119032	0.0605046	4.20918	7.30638e-49	2.99409e-48
104649078	4.3955	1.43887e-15	0.436397	0.0372574	Known_gene	1754759	1757042	NC_015446.2	0.12	0.18	0.16	0.27	0.16	0.19	0.02	0	0.03	0.24	0.48	0.23	0.436397	0.0372574	0.198541	4.3955	1.43887e-15	8.99501e-15		K19589//release factor glutamine methyltransferase [EC:2.1.1.297];K19090//CRISPR-associated protein Cas5t
104648988	6.68348	1.41486e-13	4.04072	0.00108591	Known_gene	59000641	59002117	NC_015445.2	0	0	0	0.09	0.05	0.05	0	0	0	0.17	0.49	0.61	4.04072	0.00108591	0.00509514	6.68348	1.41486e-13	9.17888e-13		K03248//translation initiation factor 3 subunit G+ko03013//RNA transport
104648983	3.36155	0.000493037	0.625687	0.110173	Known_gene	59295709	59297142	NC_015445.2	0	0.06	0	0.06	0.03	0	0	0.03	0	0.03	0.26	0	0.625687	0.110173	0.631238	3.36155	0.000493037	0.00427847		K04733//interleukin-1 receptor-associated kinase 4 [EC:2.7.11.1];K10398//kinesin family member 11
104648957	3.19163	0.000954873	-0.248782	0.121284	Known_gene	62789232	62790073	NC_015445.2	0.04	0.3	0.12	0.04	0.08	0.27	0	0	0.04	0	0.33	0.06	-0.248782	0.121284	0.700501	3.19163	0.000954873	0.00844485		K14488//SAUR family protein+ko04075//Plant hormone signal transduction
104648908	2.88666	1.56182e-05	1.00301	0.0123197	Known_gene	53198642	53201851	NC_015445.2	0	0.09	0.05	0.07	0.09	0.13	0.04	0	0	0.04	0.18	0.09	1.00301	0.0123197	0.0626865	2.88666	1.56182e-05	0.000125845		K08592//sentrin-specific protease 1 [EC:3.4.22.68]
104648860	3.53674	2.07308e-23	1.24236	0.00364794	Known_gene	57649536	57650784	NC_015445.2	0.1	0.03	0.19	0.23	0.1	0.46	0	0.23	0.11	0.35	2.86	0.69	1.24236	0.00364794	0.0177192	3.53674	2.07308e-23	1.14841e-22
104648772	3.51356	0.000254308			Known_gene	21346248	21349284	NC_015445.2	0	0	0	0	0	0	0	0	0.02	0.05	0.13	0				3.51356	0.000254308	0.00217128
104648672	2.81966	7.19997e-14	0.541154	0.00185043	Known_gene	82723954	82724941	NC_015438.2	1.03	0.79	1.05	1.02	1.11	2.11	0.14	0.18	0.08	1.05	1.04	0.69	0.541154	0.00185043	0.00880548	2.81966	7.19997e-14	4.64228e-13
104648628	2.54672	2.32499e-233	-0.311178	0.000444126	Known_gene	1738242	1739468	NC_015445.2	4.42	4.46	4.01	3	2.7	4.79	2.56	2.78	3.35	16.53	16.9	17.73	-0.311178	0.000444126	0.00203917	2.54672	2.32499e-233	3.39653e-233		K12501//homogentisate solanesyltransferase [EC:2.5.1.117]+ko00130//Ubiquinone and other terpenoid-quinone biosynthesis;K09903//uridylate kinase [EC:2.7.4.22]+ko01100//Metabolic pathways+ko00240//Pyrimidine metabolism
104648515	7.15163	1.89729e-17			Known_gene	50962222	50966925	NC_015444.2	0	0	0	0.02	0	0.01	0	0	0	0.02	0.65	0				7.15163	1.89729e-17	1.14768e-16		K14638//solute carrier family 15 (peptide/histidine transporter), member 3/4;K13457//disease resistance protein RPM1+ko04626//Plant-pathogen interaction;K08247//methionine S-methyltransferase [EC:2.1.1.12]+ko00450//Selenocompound metabolism;K07478//putative ATPase;K10357//myosin V
104648499	4.54777	9.4501e-05	1.12771	0.0144977	Known_gene	54943337	54944542	NC_015444.2	0.12	0	0.08	0.2	0.12	0.12	0	0	0	0.12	0.1	0.12	1.12771	0.0144977	0.0741592	4.54777	9.4501e-05	0.000788946		K04733//interleukin-1 receptor-associated kinase 4 [EC:2.7.11.1];K00872//homoserine kinase [EC:2.7.1.39]+ko01230//Biosynthesis of amino acids+ko01100//Metabolic pathways+ko01110//Biosynthesis of secondary metabolites+ko00260//Glycine, serine and threonine metabolism;K05658//ATP-binding cassette, subfamily B (MDR/TAP), member 1 [EC:3.6.3.44]+ko02010//ABC transporters
104648424	2.43761	5.74418e-29	0.412694	0.00926802	Known_gene	56909604	56910512	NC_015444.2	0.5	1.57	1.18	0.42	0.94	3.09	0.12	0.23	1.23	1.56	3.22	3.94	0.412694	0.00926802	0.046687	2.43761	5.74418e-29	2.94983e-28
104648413	2.77659	2.72119e-05	0.625687	0.110173	Known_gene	59095197	59096699	NC_015444.2	0.03	0.03	0	0	0	0.08	0.05	0.03	0	0.03	0.44	0.03	0.625687	0.110173	0.631238	2.77659	2.72119e-05	0.000221474
104648367	4.79807	2.66712e-05			Known_gene	40974811	40976683	NC_015444.2	0	0	0	0.06	0	0	0	0	0	0.06	0.26	0.08				4.79807	2.66712e-05	0.00021699		K01230//mannosyl-oligosaccharide alpha-1,2-mannosidase [EC:3.2.1.113]+ko04141//Protein processing in endoplasmic reticulum+ko00510//N-Glycan biosynthesis+ko01100//Metabolic pathways;K05658//ATP-binding cassette, subfamily B (MDR/TAP), member 1 [EC:3.6.3.44]+ko02010//ABC transporters;K14007//protein transport protein SEC24+ko04141//Protein processing in endoplasmic reticulum;K17822//DCN1-like prot…
104648214	3.19163	0.000954873	1.50016	0.0114757	Known_gene	15740289	15742067	NC_015444.2	0.03	0.06	0.03	0.17	0.06	0.09	0	0	0.03	0.06	0.16	0.04	1.50016	0.0114757	0.0582529	3.19163	0.000954873	0.00844485		K06671//cohesin complex subunit SA-1/2;K07203//serine/threonine-protein kinase mTOR [EC:2.7.11.1]+ko04136//Autophagy - other
104648149	2.27136	1.03823e-14	0.993931	1.88886e-05	Known_gene	80443684	80445775	NC_015438.2	0.43	0.33	0.25	0.89	0.58	0.5	0.13	0.17	0.18	1.11	0.43	0.77	0.993931	1.88886e-05	8.15529e-05	2.27136	1.03823e-14	6.60437e-14		K19589//release factor glutamine methyltransferase [EC:2.1.1.297]
104648142	4.77659	2.99229e-05			Known_gene	820193	821706	NC_015444.2	0	0	0.03	0	0	0	0	0	0	0.07	0.39	0				4.77659	2.99229e-05	0.000244329
104648117	3.27909	5.44706e-09			Known_gene	38679444	38680994	NC_015443.2	0	0	0	0	0	0	0.02	0.02	0.05	0.21	0.37	0.31				3.27909	5.44706e-09	3.9184e-08
104648099	2.17859	8.92254e-05	-1.18167	0.0402185	Known_gene	46506202	46509018	NC_015443.2	0.06	0.03	0.01	0.01	0.01	0.02	0.06	0.01	0	0	0.3	0.02	-1.18167	0.0402185	0.215017	2.17859	8.92254e-05	0.000744255		K12447//UDP-sugar pyrophosphorylase [EC:2.7.7.64]+ko00520//Amino sugar and nucleotide sugar metabolism+ko00040//Pentose and glucuronate interconversions+ko01100//Metabolic pathways+ko00052//Galactose metabolism+ko00053//Ascorbate and aldarate metabolism;K01528//dynamin GTPase [EC:3.6.5.5]+ko04144//Endocytosis;K03549//KUP system potassium uptake protein
104648091	4.36155	0.000214959	1.62569	0.0540263	Known_gene	38174755	38175636	NC_015443.2	0.04	0	0	0	0.04	0.09	0	0	0	0	0.41	0	1.62569	0.0540263	0.294318	4.36155	0.000214959	0.00182716		K07877//Ras-related protein Rab-2A
104647895	4.36155	0.000214959			Known_gene	24791923	24794269	NC_015443.2	0	0	0	0.04	0.02	0.02	0	0	0	0.11	0.02	0.05				4.36155	0.000214959	0.00182716		K13457//disease resistance protein RPM1+ko04626//Plant-pathogen interaction;K14638//solute carrier family 15 (peptide/histidine transporter), member 3/4;K08247//methionine S-methyltransferase [EC:2.1.1.12]+ko00450//Selenocompound metabolism;K19986//exocyst complex component 8;K10599//pre-mRNA-processing factor 19 [EC:2.3.2.27]+ko03040//Spliceosome+ko04120//Ubiquitin mediated proteolysis
104647593	4.56319	2.36727e-07			Known_gene	60619232	60621307	NC_015442.2	0	0	0	0	0	0	0	0.05	0	0.51	0.02	0.62				4.56319	2.36727e-07	1.78956e-06
104647480	5.19883	2.23433e-06	1.04072	0.0706647	Known_gene	13752021	13755062	NC_015442.2	0	0.02	0	0	0.02	0.02	0	0	0	0	0.2	0	1.04072	0.0706647	0.390944	5.19883	2.23433e-06	1.74343e-05		K14638//solute carrier family 15 (peptide/histidine transporter), member 3/4;K13457//disease resistance protein RPM1+ko04626//Plant-pathogen interaction;K08247//methionine S-methyltransferase [EC:2.1.1.12]+ko00450//Selenocompound metabolism;K10599//pre-mRNA-processing factor 19 [EC:2.3.2.27]+ko03040//Spliceosome+ko04120//Ubiquitin mediated proteolysis;K10357//myosin V
104647381	3.19163	0.000954873	1.04072	0.0419832	Known_gene	20435235	20436750	NC_015442.2	0	0.11	0	0.05	0.05	0.12	0	0.03	0	0	0.24	0	1.04072	0.0419832	0.225029	3.19163	0.000954873	0.00844485		K10664//E3 ubiquitin-protein ligase ATL6/9/15/31/42/55 [EC:2.3.2.27]
104647346	3.14583	3.52302e-08	0.123187	0.13715	Known_gene	10588722	10591583	NC_015442.2	0.21	0.17	0.04	0.21	0.14	0.02	0	0.08	0.03	0.17	0.37	0.4	0.123187	0.13715	0.800625	3.14583	3.52302e-08	2.59305e-07
104647301	3.36155	0.000493037	1.45576	0.0219433	Known_gene	4309029	4310234	NC_015442.2	0.06	0.03	0	0.17	0	0.06	0	0	0.03	0.06	0.23	0	1.45576	0.0219433	0.114258	3.36155	0.000493037	0.00427847
104647097	7.93107	1.30469e-26			Known_gene	38587606	38589906	NC_015441.2	0	0	0	0.02	0	0.03	0	0	0	0.03	1.79	0.02				7.93107	1.30469e-26	6.91347e-26		K03469//ribonuclease HI [EC:3.1.26.4]+ko03030//DNA replication;K07478//putative ATPase;K17541//SCY1-like protein 2
104647048	4.36239	1.03277e-14	2.84808	0.00471791	Known_gene	51300116	51302340	NC_015441.2	0	0.04	0	0.18	0	0.08	0.03	0	0.08	0.42	1.43	0.3	2.84808	0.00471791	0.0231655	4.36239	1.03277e-14	6.56803e-14		K03006//DNA-directed RNA polymerase II subunit RPB1 [EC:2.7.7.6]+ko00230//Purine metabolism+ko03020//RNA polymerase+ko01100//Metabolic pathways+ko00240//Pyrimidine metabolism;K04733//interleukin-1 receptor-associated kinase 4 [EC:2.7.11.1];K03549//KUP system potassium uptake protein;K20093//DNA excision repair protein ERCC-6-like [EC:3.6.4.12];K01528//dynamin GTPase [EC:3.6.5.5]+ko04144//Endocyto…
104646968	4.36155	0.000214959			Known_gene	51066310	51068293	NC_015441.2	0	0	0	0	0	0.02	0	0	0	0.06	0.12	0				4.36155	0.000214959	0.00182716
104646967	2.14401	5.32397e-39			Known_gene	51085723	51087647	NC_015441.2	0	0	0	0	0	0	0.56	0.65	0.29	2.92	1.69	2.06				2.14401	5.32397e-39	2.42039e-38
104646939	2.03293	2.66994e-12	0.718797	0.00108393	Known_gene	53604379	53607329	NC_015441.2	0.12	0.27	0.18	0.55	0.08	0.29	0.12	0.08	0.08	0.25	0.51	0.39	0.718797	0.00108393	0.00508019	2.03293	2.66994e-12	1.77525e-11
104646573	2.45466	8.41286e-06	-0.795776	0.0177516	Known_gene	66400070	66401353	NC_015440.2	0.27	0.25	0.15	0.03	0.24	0.11	0.05	0.05	0.03	0.06	0.51	0.19	-0.795776	0.0177516	0.0915846	2.45466	8.41286e-06	6.7095e-05
104646516	3.99898	1.10022e-08	0.869198	0.0266653	Known_gene	70638167	70641539	NC_015440.2	0.05	0.01	0.03	0.07	0.05	0.04	0.01	0	0.01	0.1	0.18	0.03	0.869198	0.0266653	0.139875	3.99898	1.10022e-08	7.97606e-08	GO:1901576//organic substance biosynthetic process;GO:0034641//cellular nitrogen compound metabolic process;GO:0044260//cellular macromolecule metabolic process;GO:0044249//cellular biosynthetic process;GO:0008152//metabolic process;GO:0010467//gene expression;GO:0044271//cellular nitrogen compound biosynthetic process;GO:0044267//cellular protein metabolic process;GO:0019538//protein metabolic p…	K02929//large subunit ribosomal protein L44e+ko03010//Ribosome
104646101	5.25096	1.05366e-10	0.84808	0.061701	Known_gene	11100997	11111137	NC_015438.2	0.03	0.01	0.01	0.05	0.01	0.03	0	0.01	0	0.1	0.34	0.05	0.84808	0.061701	0.338961	5.25096	1.05366e-10	7.26328e-10		K08247//methionine S-methyltransferase [EC:2.1.1.12]+ko00450//Selenocompound metabolism;K10357//myosin V;K14638//solute carrier family 15 (peptide/histidine transporter), member 3/4;K15156//mediator of RNA polymerase II transcription subunit 14;K14513//ethylene-insensitive protein 2+ko04016//MAPK signaling pathway - plant+ko04075//Plant hormone signal transduction
104646015	4.27909	0.000300104			Known_gene	47615460	47618196	NC_015439.2	0	0	0	0	0	0	0	0	0	0.06	0.09	0				4.27909	0.000300104	0.0025727
104645753	3.45466	3.78405e-12	0.741165	0.0456262	Known_gene	47374154	47378375	NC_015439.2	0.04	0.05	0.03	0.06	0.03	0.11	0.02	0.03	0.03	0.13	0.52	0.19	0.741165	0.0456262	0.245998	3.45466	3.78405e-12	2.52562e-11
104645739	5.67813	2.55855e-70	-0.736883	0.0505903	Known_gene	48089874	48091503	NC_015439.2	0.18	0.08	0.05	0.05	0.08	0.06	0.03	0.03	0.11	0	7.96	0	-0.736883	0.0505903	0.274195	5.67813	2.55855e-70	8.65027e-70		K08486//syntaxin 1B/2/3+ko04130//SNARE interactions in vesicular transport
104645737	4.36155	0.000214959			Known_gene	48224363	48225119	NC_015439.2	0.16	0	0	0	0	0	0	0	0	0	0.55	0				4.36155	0.000214959	0.00182716
104645717	2.04946	6.61614e-16	0.899777	2.59322e-08	Known_gene	49540132	49545161	NC_015439.2	0.33	0.23	0.58	0.97	0.58	0.58	0.13	0.11	0.11	0.53	0.62	0.25	0.899777	2.59322e-08	1.01696e-07	2.04946	6.61614e-16	4.11035e-15
104645661	3.37538	8.52151e-08	1.94476	0.0343919	Known_gene	2744553	2745227	NC_015439.2	0	0.05	0	0.15	0.05	0	0	0.05	0.11	0.23	1.16	0.3	1.94476	0.0343919	0.182713	3.37538	8.52151e-08	6.34178e-07		K01507//inorganic pyrophosphatase [EC:3.6.1.1]+ko00190//Oxidative phosphorylation;K13116//ATP-dependent RNA helicase DDX41 [EC:3.6.4.13];K11583//serine/threonine-protein phosphatase 2A regulatory subunit B''+ko03015//mRNA surveillance pathway;K10406//kinesin family member C2/C3;K05605//3-hydroxyisobutyryl-CoA hydrolase [EC:3.1.2.4]+ko00410//beta-Alanine metabolism+ko00280//Valine, leucine and iso…
104645660	4.77659	2.99229e-05			Known_gene	2799512	2800306	NC_015439.2	0	0	0	0.07	0.14	0	0	0	0	0	0.97	0				4.77659	2.99229e-05	0.000244329		K01537//Ca2+-transporting ATPase [EC:3.6.3.8]
104645478	5.71519	3.28485e-08			Known_gene	96972876	96974168	NC_015438.2	0	0	0	0	0	0.11	0	0	0	0.04	0.85	0				5.71519	3.28485e-08	2.41604e-07
104645412	5.43956	3.66639e-07	0.888722	0.0100369	Known_gene	2404877	2407128	NC_015438.2	0.11	0.11	0.19	0.39	0.17	0.21	0	0	0	0.18	0.29	0.17	0.888722	0.0100369	0.0506815	5.43956	3.66639e-07	2.78873e-06		K13065//shikimate O-hydroxycinnamoyltransferase [EC:2.3.1.133]+ko01100//Metabolic pathways+ko01110//Biosynthesis of secondary metabolites+ko00940//Phenylpropanoid biosynthesis+ko00941//Flavonoid biosynthesis+ko00945//Stilbenoid, diarylheptanoid and gingerol biosynthesis;K13065//shikimate O-hydroxycinnamoyltransferase [EC:2.3.1.133]+ko01100//Metabolic pathways+ko01110//Biosynthesis of secondary me…
104645398	4.94652	4.39457e-09	1.30376	0.0147121	Known_gene	94310541	94312249	NC_015438.2	0.06	0	0.04	0.08	0.09	0.09	0	0	0.02	0.25	0.24	0.18	1.30376	0.0147121	0.0753127	4.94652	4.39457e-09	3.15514e-08		K15078//structure-specific endonuclease subunit SLX1 [EC:3.6.1.-]
104645174	2.04961	1.08356e-05	0.625687	0.032926	Known_gene	30638032	30639059	NC_015449.2	0.24	0.17	0.13	0.34	0.21	0.29	0.07	0.17	0.04	0.43	0.31	0.43	0.625687	0.032926	0.17459	2.04961	1.08356e-05	8.67534e-05
104645143	3.51356	9.34488e-15	-0.895145	0.00276637	Known_gene	62002665	62003999	NC_015449.2	0.88	0.21	0.05	0.08	0.31	0.22	0.05	0.05	0.05	0.16	1.36	0.25	-0.895145	0.00276637	0.0133352	3.51356	9.34488e-15	5.93478e-14
104644925	6.53005	1.63444e-12			Known_gene	6834897	6839553	NC_015449.2	0.01	0	0	0	0	0	0	0	0	0	0.49	0				6.53005	1.63444e-12	1.08133e-11		K05665//ATP-binding cassette, subfamily C (CFTR/MRP), member 1+ko02010//ABC transporters;K03549//KUP system potassium uptake protein;K12447//UDP-sugar pyrophosphorylase [EC:2.7.7.64]+ko00520//Amino sugar and nucleotide sugar metabolism+ko00040//Pentose and glucuronate interconversions+ko01100//Metabolic pathways+ko00052//Galactose metabolism+ko00053//Ascorbate and aldarate metabolism
104644912	3.99898	0.000827378			Known_gene	3856537	3857767	NC_015449.2	0	0	0	0	0	0	0	0	0	0.03	0.19	0				3.99898	0.000827378	0.00727831		K01889//phenylalanyl-tRNA synthetase alpha chain [EC:6.1.1.20]+ko00970//Aminoacyl-tRNA biosynthesis;K11649//SWI/SNF related-matrix-associated actin-dependent regulator of chromatin subfamily C;K04079//molecular chaperone HtpG+ko04141//Protein processing in endoplasmic reticulum+ko04626//Plant-pathogen interaction
104644876	2.32766	2.36958e-13	0.889206	1.06877e-06	Known_gene	10308486	10310296	NC_015449.2	0.57	1.52	1.01	2.44	1.87	2.11	0.49	0.2	0.11	1.77	0.94	1.22	0.889206	1.06877e-06	4.40348e-06	2.32766	2.36958e-13	1.54389e-12
104644809	2.98757	2.41921e-33	0.500765	0.0172547	Known_gene	53461774	53468002	NC_015448.2	0.15	0.34	0.55	0.52	0.56	0.42	0.38	0.24	0.05	0.72	3.99	0.58	0.500765	0.0172547	0.0889356	2.98757	2.41921e-33	1.17109e-32	GO:0016020//membrane;GO:0016021//integral component of membrane;GO:0031224//intrinsic component of membrane;GO:0044425//membrane part;
104644806	4.19163	0.000419996			Known_gene	51641644	51642255	NC_015448.2	0	0	0	0.06	0	0.06	0	0	0	0.06	0.47	0				4.19163	0.000419996	0.00363028		K11885//DNA damage-inducible protein 1
104644805	7.36735	1.32294e-19			Known_gene	51325744	51328134	NC_015448.2	0	0	0	0	0.05	0	0	0	0	0.02	1.32	0				7.36735	1.32294e-19	7.74365e-19		K03469//ribonuclease HI [EC:3.1.26.4]+ko03030//DNA replication;K17541//SCY1-like protein 2;K14638//solute carrier family 15 (peptide/histidine transporter), member 3/4
104644726	3.09852	4.5395e-05	1.36265	0.0437136	Known_gene	17595471	17596667	NC_015448.2	0	0.06	0	0.09	0	0.06	0.03	0.03	0	0.15	0.29	0.04	1.36265	0.0437136	0.23494	3.09852	4.5395e-05	0.000373483		K17913//carlactone synthase / all-trans-10'-apo-beta-carotenal 13,14-cleaving dioxygenase [EC:1.13.11.69 1.13.11.70]+ko00906//Carotenoid biosynthesis;K03013//DNA-directed RNA polymerases I, II, and III subunit RPABC1+ko00230//Purine metabolism+ko03020//RNA polymerase+ko01100//Metabolic pathways+ko00240//Pyrimidine metabolism;K13111//WD40 repeat-containing protein SMU1;K14491//two-component respon…
104644622	5.58395	1.08914e-07	4.04612	0.0010661	Known_gene	24074356	24077196	NC_015448.2	0	0	0	0.06	0.03	0.03	0	0	0	0.06	0.13	0.18	4.04612	0.0010661	0.00499548	5.58395	1.08914e-07	8.13703e-07		K12447//UDP-sugar pyrophosphorylase [EC:2.7.7.64]+ko00520//Amino sugar and nucleotide sugar metabolism+ko00040//Pentose and glucuronate interconversions+ko01100//Metabolic pathways+ko00052//Galactose metabolism+ko00053//Ascorbate and aldarate metabolism;K08235//xyloglucan:xyloglucosyl transferase [EC:2.4.1.207];K03517//quinolinate synthase [EC:2.5.1.72]+ko01100//Metabolic pathways+ko00760//Nicoti…
104644607	4.77659	2.99229e-05	-0.959275	0.101261	Known_gene	19019934	19023008	NC_015448.2	0.02	0	0	0	0.01	0	0	0	0	0.05	0.08	0.03	-0.959275	0.101261	0.576055	4.77659	2.99229e-05	0.000244329		K12447//UDP-sugar pyrophosphorylase [EC:2.7.7.64]+ko00520//Amino sugar and nucleotide sugar metabolism+ko00040//Pentose and glucuronate interconversions+ko01100//Metabolic pathways+ko00052//Galactose metabolism+ko00053//Ascorbate and aldarate metabolism;K03517//quinolinate synthase [EC:2.5.1.72]+ko01100//Metabolic pathways+ko00760//Nicotinate and nicotinamide metabolism;K03006//DNA-directed RNA p…
104644532	5.27909	1.25908e-06			Known_gene	383218	384485	NC_015448.2	0	0	0	0	0.03	0	0	0	0	0	0.52	0				5.27909	1.25908e-06	9.74037e-06
104644463	2.7849	0.000134706	-0.155587	0.134204	Known_gene	1868334	1870217	NC_015448.2	0.08	0.11	0.13	0.15	0.09	0.05	0.03	0	0.03	0.17	0	0.22	-0.155587	0.134204	0.782172	2.7849	0.000134706	0.00113346	GO:0044267//cellular protein metabolic process;GO:0006511//ubiquitin-dependent protein catabolic process;GO:0006807//nitrogen compound metabolic process;GO:0006508//proteolysis;GO:0019941//modification-dependent protein catabolic process;GO:0010498//proteasomal protein catabolic process;GO:1901575//organic substance catabolic process;GO:0043170//macromolecule metabolic process;GO:0043412//macromo…
104644396	3.26202	3.11345e-07	1.77191	0.0187874	Known_gene	64921438	64923550	NC_015447.2	0	0.04	0	0.02	0.06	0.05	0.04	0.02	0	0.12	0.4	0.03	1.77191	0.0187874	0.0973265	3.26202	3.11345e-07	2.36299e-06
104644325	3.69318	4.29982e-216			Known_gene	316863	325251	NC_015446.2	0	0	0.01	0	0	0	0.41	0.55	0.39	5.25	7.37	4.9				3.69318	4.29982e-216	6.69553e-216		K11323//histone arginine demethylase JMJD6 [EC:1.14.11.-]
104644309	2.13292	1.50892e-14	-0.454914	0.0015146	Known_gene	60032547	60035727	NC_015441.2	0.32	0.62	0.91	0.12	0.46	0.81	0	0.2	0.09	0.19	0.78	0.28	-0.454914	0.0015146	0.00716616	2.13292	1.50892e-14	9.62115e-14		K04733//interleukin-1 receptor-associated kinase 4 [EC:2.7.11.1]
101268888	4.33032	0	0.657498	2.15402e-19	Known_gene	65208338	65209551	NC_015444.2	5.01	7.46	4.87	7.57	11.9	7.84	0.43	0.94	3.96	20.86	35.2	53.96	0.657498	2.15402e-19	6.73194e-19	4.33032	0	0		K04733//interleukin-1 receptor-associated kinase 4 [EC:2.7.11.1]
101268829	2.70832	0	0.835525	5.04851e-98	Known_gene	43144033	43146283	NC_015439.2	15.83	10.97	14.54	19.22	24.02	31.35	6.76	5.69	6.19	34.62	52.37	34.7	0.835525	5.04851e-98	7.52673e-98	2.70832	0	0
101268804	4.99898	8.29576e-06			Known_gene	70780891	70784099	NC_015446.2	0	0	0	0	0	0	0	0	0	0	0.47	0				4.99898	8.29576e-06	6.61439e-05		K02941//large subunit ribosomal protein LP0+ko03010//Ribosome
101268709	2.05309	1.80746e-134	0.628284	1.50026e-11	Known_gene	60887180	60889282	NC_015445.2	1.93	2.7	1.31	2.61	2.18	4.42	1.25	1.73	2.2	5.27	9.13	7.26	0.628284	1.50026e-11	5.43294e-11	2.05309	1.80746e-134	4.02621e-134
101268671	3.99898	0.000827378			Known_gene	67706335	67707842	NC_015440.2	0	0	0	0	0	0.04	0	0	0	0.13	0.12	0.06				3.99898	0.000827378	0.00727831		K01528//dynamin GTPase [EC:3.6.5.5]+ko04144//Endocytosis;K01528//dynamin GTPase [EC:3.6.5.5]+ko04144//Endocytosis;K01528//dynamin GTPase [EC:3.6.5.5]+ko04144//Endocytosis
101268643	3.99898	0.000827378	1.04072	0.0108659	Known_gene	46591759	46592964	NC_015439.2	0.03	0.12	0.14	0.14	0.17	0.27	0	0	0	0.03	0.1	0.12	1.04072	0.0108659	0.0550679	3.99898	0.000827378	0.00727831
101268542	2.41706	0	0.944327	2.15628e-28	Known_gene	38282151	38286702	NC_015439.2	0.96	2.21	2.04	2.19	2.35	5.67	3.39	2.13	2.95	12.14	10.91	24.16	0.944327	2.15628e-28	5.88343e-28	2.41706	0	0	GO:0043412//macromolecule modification;GO:0044238//primary metabolic process;GO:0044267//cellular protein metabolic process;GO:0008152//metabolic process;GO:0006793//phosphorus metabolic process;GO:0019538//protein metabolic process;GO:0016310//phosphorylation;GO:0044260//cellular macromolecule metabolic process;GO:0006796//phosphate-containing compound metabolic process;GO:0006464//cellular prot…	K04733//interleukin-1 receptor-associated kinase 4 [EC:2.7.11.1]
101268529	2.29491	0	0.0790809	0.0167968	Known_gene	54052768	54055389	NC_015439.2	16	23.38	17.94	17.93	15.43	24.49	13.62	17.85	17.94	41.79	140.68	53.45	0.0790809	0.0167968	0.0864832	2.29491	0	0	GO:0034641//cellular nitrogen compound metabolic process;GO:0009987//cellular process;GO:0044271//cellular nitrogen compound biosynthetic process;GO:0034654//nucleobase-containing compound biosynthetic process;GO:0009058//biosynthetic process;GO:1901360//organic cyclic compound metabolic process;GO:0018130//heterocycle biosynthetic process;GO:0006807//nitrogen compound metabolic process;GO:009030…	K09286//EREBP-like factor;K09286//EREBP-like factor
101268379	3.39041	1.36547e-22	0.741165	0.0456262	Known_gene	1872	2529	NW_004196352.1	0.39	0	0.12	0.26	0.33	0.28	0.13	0.45	0.14	2.76	2.48	2.46	0.741165	0.0456262	0.245998	3.39041	1.36547e-22	7.66107e-22		K10960//geranylgeranyl diphosphate/geranylgeranyl-bacteriochlorophyllide a reductase [EC:1.3.1.83 1.3.1.111]+ko00900//Terpenoid backbone biosynthesis+ko00860//Porphyrin and chlorophyll metabolism+ko01100//Metabolic pathways+ko01110//Biosynthesis of secondary metabolites;K00679//phospholipid:diacylglycerol acyltransferase [EC:2.3.1.158]+ko00561//Glycerolipid metabolism;K21026//acetylajmaline ester…
101268288	2.5961	3.97466e-308	0.600553	5.07794e-11	Known_gene	41161376	41164885	NC_015443.2	1.06	1.31	1.27	2.15	1.22	2.17	1.17	1.34	1.15	2.83	15.65	3.26	0.600553	5.07794e-11	1.85984e-10	2.5961	3.97466e-308	4.69746e-308
101268273	3.26289	0	-0.513551	1.21498e-18	Known_gene	1559945	1564004	NC_015441.2	7.83	12.13	9.22	4.26	2.78	10.53	1.51	2.49	2.66	11.47	18.8	26.1	-0.513551	1.21498e-18	3.84226e-18	3.26289	0	0	GO:0016310//phosphorylation;GO:0006793//phosphorus metabolic process;GO:1901564//organonitrogen compound metabolic process;GO:0009987//cellular process;GO:0006464//cellular protein modification process;GO:0044237//cellular metabolic process;GO:0006796//phosphate-containing compound metabolic process;GO:0006807//nitrogen compound metabolic process;GO:0043412//macromolecule modification;GO:0044238/…	K04733//interleukin-1 receptor-associated kinase 4 [EC:2.7.11.1];K04733//interleukin-1 receptor-associated kinase 4 [EC:2.7.11.1];K04733//interleukin-1 receptor-associated kinase 4 [EC:2.7.11.1];K04733//interleukin-1 receptor-associated kinase 4 [EC:2.7.11.1];K04733//interleukin-1 receptor-associated kinase 4 [EC:2.7.11.1];K04733//interleukin-1 receptor-associated kinase 4 [EC:2.7.11.1]
101268239	5.10537	5.67457e-55	1.04072	0.096168	Known_gene	63608809	63612073	NC_015447.2	0.03	0	0	0.03	0	0.04	0.04	0.1	0.11	2.89	2.12	3.84	1.04072	0.096168	0.544095	5.10537	5.67457e-55	2.18556e-54		K01674//carbonic anhydrase [EC:4.2.1.1]+ko00910//Nitrogen metabolism
101268177	5.15233	3.35833e-10	3.62569	0.00396452	Known_gene	51302362	51302949	NC_015441.2	0	0	0	0.25	0.06	0.07	0.06	0	0	0.41	1.46	0.37	3.62569	0.00396452	0.0193431	5.15233	3.35833e-10	2.34318e-09		K01904//4-coumarate--CoA ligase [EC:6.2.1.12]+ko00130//Ubiquinone and other terpenoid-quinone biosynthesis+ko01100//Metabolic pathways+ko01110//Biosynthesis of secondary metabolites+ko00940//Phenylpropanoid biosynthesis+ko00360//Phenylalanine metabolism;K03006//DNA-directed RNA polymerase II subunit RPB1 [EC:2.7.7.6]+ko00230//Purine metabolism+ko03020//RNA polymerase+ko01100//Metabolic pathways+k…
101268113	2.48465	1.89448e-175	0.97497	4.22529e-16	Known_gene	44288473	44291153	NC_015443.2	2.03	2.52	1.81	2.99	4.04	5.33	1.98	2.24	3.43	9.94	12.57	17.99	0.97497	4.22529e-16	1.39814e-15	2.48465	1.89448e-175	3.48354e-175	GO:0046907//intracellular transport;GO:0015718//monocarboxylic acid transport;GO:0006839//mitochondrial transport;GO:0006811//ion transport;GO:0051641//cellular localization;GO:0051649//establishment of localization in cell;GO:0051234//establishment of localization;GO:0071702//organic substance transport;GO:0046942//carboxylic acid transport;GO:0006820//anion transport;GO:0006850//mitochondrial p…	K22138//mitochondrial pyruvate carrier 1
101268031	3.30299	2.24475e-138	0.704441	4.33866e-12	Known_gene	69298968	69301203	NC_015446.2	2.25	1.98	2.18	2.66	3.48	4.15	0.18	0.63	0.91	0.5	14.15	1.79	0.704441	4.33866e-12	1.55221e-11	3.30299	2.24475e-138	4.90501e-138	GO:0032501//multicellular organismal process;GO:0010154//fruit development;GO:0007275//multicellular organism development;GO:0061458//reproductive system development;GO:0021700//developmental maturation;GO:1900674//olefin biosynthetic process;GO:0071704//organic substance metabolic process;GO:0043449//cellular alkene metabolic process;GO:0000003//reproduction;GO:0008152//metabolic process;GO:0048…	K13229//2,4-dihydroxy-1,4-benzoxazin-3-one-glucoside dioxygenase [EC:1.14.20.2]+ko00402//Benzoxazinoid biosynthesis;K06892//feruloyl-CoA ortho-hydroxylase [EC:1.14.11.-]+ko01110//Biosynthesis of secondary metabolites+ko00940//Phenylpropanoid biosynthesis;K13229//2,4-dihydroxy-1,4-benzoxazin-3-one-glucoside dioxygenase [EC:1.14.20.2]+ko00402//Benzoxazinoid biosynthesis;K06892//feruloyl-CoA ortho-h…
101268028	2.19163	7.20752e-06	1.5553	0.00183585	Known_gene	78456509	78460245	NC_015438.2	0	0.05	0.02	0.06	0.02	0.11	0.02	0.03	0.02	0.17	0.03	0.1	1.5553	0.00183585	0.00873457	2.19163	7.20752e-06	5.7303e-05		K14494//DELLA protein+ko04075//Plant hormone signal transduction
101268009	4.51356	0.000110664	0.455762	0.117537	Known_gene	55781625	55783487	NC_015444.2	0.03	0.07	0	0.03	0.1	0	0	0	0	0.18	0.15	0.05	0.455762	0.117537	0.677569	4.51356	0.000110664	0.000927321		K06890//uncharacterized protein;K06890//uncharacterized protein
101267992	2.33094	1.46153e-11	-0.0563332	0.152601	Known_gene	6272970	6277696	NC_015442.2	0.19	0.1	0	0.26	0.19	0.13	0.15	0.06	0	0.41	0.39	0.19	-0.0563332	0.152601	0.897659	2.33094	1.46153e-11	9.89022e-11	GO:0009987//cellular process;GO:0008152//metabolic process;GO:0044260//cellular macromolecule metabolic process;GO:0034641//cellular nitrogen compound metabolic process;GO:0043412//macromolecule modification;GO:0046483//heterocycle metabolic process;GO:0071704//organic substance metabolic process;GO:0031425//chloroplast RNA processing;GO:0043170//macromolecule metabolic process;GO:0006807//nitrog…	K01166//ribonuclease T2 [EC:3.1.27.1];K03452//magnesium/proton exchanger;K10683//BRCA1-associated RING domain protein 1+ko03440//Homologous recombination;K03452//magnesium/proton exchanger;K10683//BRCA1-associated RING domain protein 1+ko03440//Homologous recombination
101267990	2.47059	0	0.443727	6.40706e-60	Known_gene	10483996	10485751	NC_015442.2	35.97	38.93	30.4	15.68	38.8	91.56	36.64	31.56	35.13	174.62	178.33	231.52	0.443727	6.40706e-60	1.26933e-59	2.47059	0	0
101267981	3.34038	0	0.0330712	0.0980963	Known_gene	61766501	61767907	NC_015440.2	6.63	11.89	13.31	6.34	11.57	15.17	1.3	1.65	1.61	5.49	33.83	5.96	0.0330712	0.0980963	0.555976	3.34038	0	0
101267949	2.65106	0.000556402	-0.139847	0.110798	Known_gene	63606604	63608097	NC_015447.2	1.2	0.56	0.41	0.26	0.69	1.05	0	0.09	0	0.18	0	0.42	-0.139847	0.110798	0.635185	2.65106	0.000556402	0.00484475		K09873//aquaporin TIP
101267895	5.18621	2.43822e-06			Known_gene	60605652	60608632	NC_015442.2	0	0	0	0	0	0	0	0	0	0.1	0.08	0.02				5.18621	2.43822e-06	1.90568e-05		K13453//disease resistance protein+ko04626//Plant-pathogen interaction;K13457//disease resistance protein RPM1+ko04626//Plant-pathogen interaction
101267886	2.08779	2.30192e-18	0.53605	0.00191143	Known_gene	60706687	60708314	NC_015441.2	0.42	0.45	0.84	0.83	0.63	1.05	0.27	0.17	0.33	0.96	1.13	1.25	0.53605	0.00191143	0.00909993	2.08779	2.30192e-18	1.37206e-17		K19041//E3 ubiquitin-protein ligase RNF38/44 [EC:2.3.2.27];K10664//E3 ubiquitin-protein ligase ATL6/9/15/31/42/55 [EC:2.3.2.27]
101267882	3.77659	6.7797e-05	-0.596705	0.0596826	Known_gene	67133133	67134399	NC_015440.2	0.06	0.18	0.17	0.03	0.15	0.1	0	0	0.03	0.1	0.24	0.08	-0.596705	0.0596826	0.327132	3.77659	6.7797e-05	0.000562812		K09286//EREBP-like factor
101267872	5.19163	2.34805e-06	2.26312	0.00101269	Known_gene	5679629	5682448	NC_015449.2	0	0.18	0	0	0.31	0.58	0	0	0	0.45	0.21	0.51	2.26312	0.00101269	0.00474411	5.19163	2.34805e-06	1.83435e-05		K18453//ADP-ribose/FAD diphosphatase [EC:3.6.1.13 3.6.1.18]+ko00740//Riboflavin metabolism+ko00230//Purine metabolism+ko01100//Metabolic pathways
101267866	4.77659	2.99229e-05	-1.2812	0.0488084	Known_gene	56202974	56205233	NC_015448.2	0.02	0.06	0.02	0	0	0.04	0	0	0	0.04	0.14	0.11	-1.2812	0.0488084	0.264108	4.77659	2.99229e-05	0.000244329
101267787	3.19163	0.000954873	-0.281203	0.132389	Known_gene	60892266	60894318	NC_015440.2	0	0.03	0.05	0.02	0.03	0.02	0.02	0	0	0.05	0.04	0.07	-0.281203	0.132389	0.770684	3.19163	0.000954873	0.00844485		K15271//ATP-dependent DNA helicase HFM1/MER3 [EC:3.6.4.12]
101267773	2.6322	3.31114e-91	0.890308	1.91967e-13	Known_gene	35607181	35608508	NC_015439.2	1.61	2.03	1.56	2.71	3.43	3.53	0.84	1.11	0.83	3.36	10.94	2.59	0.890308	1.91967e-13	6.67254e-13	2.6322	3.31114e-91	9.57493e-91
101267758	2.08327	0	0.81729	1.81348e-265	Known_gene	495088	498122	NC_015448.2	29.51	39.27	32.88	53.99	50.85	75.51	30.04	33.89	45.06	64.49	298.89	92.63	0.81729	1.81348e-265	1.33339e-265	2.08327	0	0		K08770//ubiquitin C;K08770//ubiquitin C
101267532	2.77659	0.000299363	1.45576	0.0219433	Known_gene	44742299	44743399	NC_015443.2	0.05	0	0.09	0	0.24	0.15	0	0.05	0.05	0.15	0.43	0.07	1.45576	0.0219433	0.114258	2.77659	0.000299363	0.00256588		K11000//callose synthase [EC:2.4.1.-];K11855//ubiquitin carboxyl-terminal hydrolase 36/42 [EC:3.4.19.12]
101267354	2.8537	1.26692e-184	0.55951	3.01863e-12	Known_gene	90311060	90315783	NC_015438.2	2.32	2.37	1.54	2.25	1.96	4.82	0.2	0.72	1.34	5.78	4.79	5.22	0.55951	3.01863e-12	1.07688e-11	2.8537	1.26692e-184	2.24564e-184	GO:0010647//positive regulation of cell communication;GO:2000070//regulation of response to water deprivation;GO:0050776//regulation of immune response;GO:0009416//response to light stimulus;GO:1905959//positive regulation of cellular response to alcohol;GO:1901421//positive regulation of response to alcohol;GO:0065007//biological regulation;GO:0051707//response to other organism;GO:0080090//regu…	K04733//interleukin-1 receptor-associated kinase 4 [EC:2.7.11.1];K21989//calcium permeable stress-gated cation channel
101267307	6.04961	9.84057e-10	1.14026	0.0143914	Known_gene	60122904	60131286	NC_015441.2	0.01	0.03	0.03	0.1	0.02	0.03	0	0	0	0.03	0.29	0.01	1.14026	0.0143914	0.0735994	6.04961	9.84057e-10	6.93882e-09		K19533//synaptonemal complex protein 1;K04077//chaperonin GroEL+ko03018//RNA degradation;K14502//protein brassinosteroid insensitive 2 [EC:2.7.11.1]+ko04075//Plant hormone signal transduction
101267215	4.65106	5.73687e-05	0.21065	0.131258	Known_gene	65569116	65570803	NC_015449.2	0	0.12	0.04	0	0	0.19	0	0	0	0.04	0.16	0.06	0.21065	0.131258	0.763594	4.65106	5.73687e-05	0.000474283		K13065//shikimate O-hydroxycinnamoyltransferase [EC:2.3.1.133]+ko01100//Metabolic pathways+ko01110//Biosynthesis of secondary metabolites+ko00940//Phenylpropanoid biosynthesis+ko00941//Flavonoid biosynthesis+ko00945//Stilbenoid, diarylheptanoid and gingerol biosynthesis
101267151	3.25165	4.15524e-100	-0.700106	6.71482e-12	Known_gene	1583239	1584760	NC_015438.2	1.34	6.55	3.06	0.5	1.51	4.87	0.2	0.59	0.62	1.67	5.17	7.31	-0.700106	6.71482e-12	2.41098e-11	3.25165	4.15524e-100	1.13748e-99		K08332//;K10260//F-box and WD-40 domain protein 7+ko04120//Ubiquitin mediated proteolysis;K04733//interleukin-1 receptor-associated kinase 4 [EC:2.7.11.1]
101267094	2.33459	4.3209e-60	0.71629	1.73503e-09	Known_gene	4203524	4205690	NC_015449.2	0.72	1.46	1.16	2.26	1.57	1.64	0.47	0.48	0.58	2.03	3.51	2.16	0.71629	1.73503e-09	6.59895e-09	2.33459	4.3209e-60	1.5906e-59		K03294//basic amino acid/polyamine antiporter, APA family
101267062	2.36155	1.24286e-13	0.571208	3.32782e-75	Known_gene	71210431	71215317	NC_015446.2	40.7	43.18	40.82	60.95	59.33	66.18	0.19	0.42	0.08	1.18	1.55	0.85	0.571208	3.32782e-75	5.81511e-75	2.36155	1.24286e-13	8.05467e-13	GO:1901363//heterocyclic compound binding;GO:0005488//binding;GO:0097159//organic cyclic compound binding;GO:0003676//nucleic acid binding;	K14011//UBX domain-containing protein 6+ko04141//Protein processing in endoplasmic reticulum;K14011//UBX domain-containing protein 6+ko04141//Protein processing in endoplasmic reticulum
101267005	2.56735	0	0.668321	1.70913e-78	Known_gene	54907172	54999522	NC_015440.2	29.19	36.93	44.65	37.05	49.7	84.64	21.01	16.14	25.5	126.61	106.18	148.18	0.668321	1.70913e-78	2.91186e-78	2.56735	0	0	GO:0044237//cellular metabolic process;GO:0019438//aromatic compound biosynthetic process;GO:0009059//macromolecule biosynthetic process;GO:0044260//cellular macromolecule metabolic process;GO:0044249//cellular biosynthetic process;GO:0008152//metabolic process;GO:0034645//cellular macromolecule biosynthetic process;GO:0009058//biosynthetic process;GO:0034641//cellular nitrogen compound metabolic…	K09286//EREBP-like factor;K09286//EREBP-like factor;K09286//EREBP-like factor
101266963	3.41402	4.20864e-36	0.365189	1.89299e-07	Known_gene	62952317	62954627	NC_015445.2	3.22	4.08	4.94	7.65	3.42	4.73	0.04	0.04	0.27	0.69	0.9	2.22	0.365189	1.89299e-07	7.61616e-07	3.41402	4.20864e-36	1.9787e-35		K20770//(+)-delta-cadinene 8-hydroxylase [EC:1.14.-.-];K00512//steroid 17alpha-monooxygenase / 17alpha-hydroxyprogesterone deacetylase [EC:1.14.14.19 1.14.14.32]+ko01100//Metabolic pathways;K20562//biphenyl-4-hydroxylase
101266899	2.1438	2.61617e-24	0.455762	0.00017832	Known_gene	36105111	36106619	NC_015439.2	1.27	2.26	0.89	0.23	1.28	4.68	0.11	0.41	0.55	0.89	2.85	0.91	0.455762	0.00017832	0.000801875	2.1438	2.61617e-24	1.43179e-23		K20716//mitogen-activated protein kinase kinase kinase 17/18+ko04016//MAPK signaling pathway - plant
101266834	2.12079	1.14313e-57	0.606322	3.45699e-06	Known_gene	39192899	39195248	NC_015443.2	0.8	1.23	0.57	1.23	0.96	1.77	0.51	0.52	0.81	2.19	3.01	2.84	0.606322	3.45699e-06	1.44894e-05	2.12079	1.14313e-57	4.29506e-57
101266801	2.51356	2.46173e-11	0.350409	0.02426	Known_gene	2291540	2297158	NC_015449.2	0.22	0.35	0.24	0.38	0.29	0.35	0.01	0.09	0.04	0.19	0.29	0.33	0.350409	0.02426	0.126757	2.51356	2.46173e-11	1.67325e-10		K04733//interleukin-1 receptor-associated kinase 4 [EC:2.7.11.1]
101266758	2.30711	0.000537136	0.625687	0.0887011	Known_gene	83133439	83135201	NC_015438.2	0.02	0.04	0.02	0.02	0.08	0.02	0.02	0.02	0.02	0	0.28	0	0.625687	0.0887011	0.497264	2.30711	0.000537136	0.00467033	GO:0072522//purine-containing compound biosynthetic process;GO:0072521//purine-containing compound metabolic process;GO:0046148//pigment biosynthetic process;GO:0009113//purine nucleobase biosynthetic process;GO:0018130//heterocycle biosynthetic process;GO:1901566//organonitrogen compound biosynthetic process;GO:1901360//organic cyclic compound metabolic process;GO:1901564//organonitrogen compoun…	K00764//amidophosphoribosyltransferase [EC:2.4.2.14]+ko00250//Alanine, aspartate and glutamate metabolism+ko00230//Purine metabolism+ko01100//Metabolic pathways+ko01110//Biosynthesis of secondary metabolites
101266745	2.00903	0	0.759866	7.29097e-151	Known_gene	63829133	63832381	NC_015445.2	22.69	32.24	26.28	33.71	29.25	76.58	26.69	29.61	32.92	125.82	94.72	144.46	0.759866	7.29097e-151	8.13343e-151	2.00903	0	0	GO:0005975//carbohydrate metabolic process;GO:0005996//monosaccharide metabolic process;GO:0071704//organic substance metabolic process;GO:0006012//galactose metabolic process;GO:0044238//primary metabolic process;GO:0019318//hexose metabolic process;GO:0008152//metabolic process;GO:0044281//small molecule metabolic process;GO:0003824//catalytic activity;GO:0016857//racemase and epimerase activit…	K01784//UDP-glucose 4-epimerase [EC:5.1.3.2]+ko00520//Amino sugar and nucleotide sugar metabolism+ko01100//Metabolic pathways+ko00052//Galactose metabolism
101266712	7.66914	4.35674e-23	3.84808	0.00206942	Known_gene	165	2375	NW_004195438.1	0	0	0	0.02	0.07	0.03	0	0	0	0.02	1.6	0.02	3.84808	0.00206942	0.00988454	7.66914	4.35674e-23	2.42723e-22		K03469//ribonuclease HI [EC:3.1.26.4]+ko03030//DNA replication;K17541//SCY1-like protein 2;K07478//putative ATPase
101266631	2.15099	2.14597e-15	-0.0356261	0.147439	Known_gene	61788691	61791661	NC_015441.2	0.3	0.46	0.36	0.26	0.3	0.56	0.15	0.06	0.11	0.06	1.24	0.1	-0.0356261	0.147439	0.865228	2.15099	2.14597e-15	1.34665e-14
101266621	2.28852	2.18574e-10	-0.248782	0.0792366	Known_gene	1137	2536	NW_004196269.1	0.39	0.57	0.57	0.84	0.14	0.3	0.07	0.14	0.3	0.38	1.07	1.13	-0.248782	0.0792366	0.441722	2.28852	2.18574e-10	1.51779e-09		K04733//interleukin-1 receptor-associated kinase 4 [EC:2.7.11.1]
101266612	3.84125	6.8136e-112	-0.268603	0.0198053	Known_gene	62548554	62550810	NC_015449.2	1.16	1.89	1.15	0.98	0.76	1.97	0.03	0.19	0.84	0.43	13.59	0.72	-0.268603	0.0198053	0.102725	3.84125	6.8136e-112	1.73928e-111		K09286//EREBP-like factor;K09286//EREBP-like factor;K09286//EREBP-like factor;K12900//FUS-interacting serine-arginine-rich protein 1+ko03040//Spliceosome;K09286//EREBP-like factor
101266611	2.3882	7.54806e-288	0.803367	2.02026e-16	Known_gene	48795372	48802644	NC_015449.2	0.96	1.36	1.7	3.11	1.61	2.33	1.87	1.89	2.01	1.97	25.17	2.15	0.803367	2.02026e-16	6.64554e-16	2.3882	7.54806e-288	9.43647e-288		K01052//lysosomal acid lipase/cholesteryl ester hydrolase [EC:3.1.1.13]+ko04979//Cholesterol metabolism+ko00100//Steroid biosynthesis
101266570	3.81104	9.88032e-08	0.333845	0.124308	Known_gene	86590333	86591414	NC_015438.2	0	0	0.13	0.17	0	0	0.03	0.03	0	0.1	0.6	0.22	0.333845	0.124308	0.719542	3.81104	9.88032e-08	7.36479e-07		K01183//chitinase [EC:3.2.1.14]+ko00520//Amino sugar and nucleotide sugar metabolism+ko01100//Metabolic pathways
101266569	2.66789	8.23879e-166	-0.00109539	0.166459	Known_gene	97813023	97815992	NC_015438.2	1.07	1.29	1.49	1.18	1.62	1.07	1.17	1.56	1.52	0.95	23.63	1.61	-0.00109539	0.166459	0.994374	2.66789	8.23879e-166	1.57507e-165		K10752//histone-binding protein RBBP4
101266554	3.5295	3.42331e-21	0.555298	0.0152846	Known_gene	6258448	6261226	NC_015446.2	0.23	0.22	0.13	0.21	0.2	0.44	0	0.07	0.09	0.51	0.78	0.46	0.555298	0.0152846	0.0783356	3.5295	3.42331e-21	1.95948e-20		K20716//mitogen-activated protein kinase kinase kinase 17/18+ko04016//MAPK signaling pathway - plant
101266548	2.3029	8.77049e-57	-0.437724	3.57425e-07	Known_gene	1576673	1578203	NC_015438.2	2.24	5.62	5.28	1.86	2.6	5.42	0.67	0.73	0.75	1.88	2.71	6.77	-0.437724	3.57425e-07	1.44925e-06	2.3029	8.77049e-57	3.32847e-56		K08332//;K10260//F-box and WD-40 domain protein 7+ko04120//Ubiquitin mediated proteolysis;K04733//interleukin-1 receptor-associated kinase 4 [EC:2.7.11.1]
101266427	4.36155	1.34691e-06	0.403295	0.101485	Known_gene	48429480	48430191	NC_015443.2	0.07	0.36	0.07	0.28	0.07	0.3	0	0.07	0	0.68	0.48	0.3	0.403295	0.101485	0.577585	4.36155	1.34691e-06	1.04296e-05		K17505//protein phosphatase 1K [EC:3.1.3.16]
101266357	2.99898	8.54529e-05	2.36265	0.016206	Known_gene	58223891	58229547	NC_015445.2	0	0.02	0	0.02	0.03	0.03	0	0.02	0.02	0.07	0.18	0	2.36265	0.016206	0.0833257	2.99898	8.54529e-05	0.000711902		K04733//interleukin-1 receptor-associated kinase 4 [EC:2.7.11.1]
101266195	3.89207	3.51163e-05	2.1562	0.00173871	Known_gene	4159425	4160971	NC_015449.2	0.07	0	0.03	0.28	0.04	0.15	0.04	0	0	0.11	0.36	0.05	2.1562	0.00173871	0.00826331	3.89207	3.51163e-05	0.000287589		K00799//glutathione S-transferase [EC:2.5.1.18]+ko00480//Glutathione metabolism
101266061	2.64738	3.42334e-186	0.493851	3.87781e-06	Known_gene	333068	337007	NC_015438.2	1.99	2.14	2.02	3.01	2.07	2.49	1.25	1.98	1.95	5.07	16.65	7.66	0.493851	3.87781e-06	1.62981e-05	2.64738	3.42334e-186	6.03249e-186
101265817	2.17914	7.29517e-17	0.26686	0.015703	Known_gene	53289484	53295082	NC_015441.2	0.6	1.04	1.22	1.28	0.9	1.24	0.14	0.14	0.24	0.62	0.8	0.96	0.26686	0.015703	0.0805796	2.17914	7.29517e-17	4.45668e-16		K01834//2,3-bisphosphoglycerate-dependent phosphoglycerate mutase [EC:5.4.2.11]+ko00010//Glycolysis / Gluconeogenesis+ko01230//Biosynthesis of amino acids+ko01100//Metabolic pathways+ko01110//Biosynthesis of secondary metabolites+ko00260//Glycine, serine and threonine metabolism+ko01200//Carbon metabolism;K01834//2,3-bisphosphoglycerate-dependent phosphoglycerate mutase [EC:5.4.2.11]+ko00010//Gly…
101265791	2.559	5.32733e-22	0.737333	0.000414212	Known_gene	46052977	46068019	NC_015439.2	0.84	0.61	0.64	1.4	0.73	1.36	0.08	0.3	0.61	1.28	1.93	2.7	0.737333	0.000414212	0.00189943	2.559	5.32733e-22	3.0154e-21	GO:0071705//nitrogen compound transport;GO:0071702//organic substance transport;GO:0065003//macromolecular complex assembly;GO:0046483//heterocycle metabolic process;GO:0016043//cellular component organization;GO:0034660//ncRNA metabolic process;GO:0044237//cellular metabolic process;GO:0006807//nitrogen compound metabolic process;GO:0045184//establishment of protein localization;GO:0051656//esta…	K03264//translation initiation factor 6+ko03008//Ribosome biogenesis in eukaryotes;K03264//translation initiation factor 6+ko03008//Ribosome biogenesis in eukaryotes;K03264//translation initiation factor 6+ko03008//Ribosome biogenesis in eukaryotes;K03264//translation initiation factor 6+ko03008//Ribosome biogenesis in eukaryotes
101265780	3.31945	0	0.961664	3.34822e-65	Known_gene	52082083	52083088	NC_015447.2	14.73	17.77	11.59	19.82	21.08	37.54	9.06	13.08	11.01	59.75	138.73	122.2	0.961664	3.34822e-65	6.31847e-65	3.31945	0	0		K13195//cold-inducible RNA-binding protein;K13098//RNA-binding protein FUS;K13098//RNA-binding protein FUS;K12741//heterogeneous nuclear ribonucleoprotein A1/A3+ko03040//Spliceosome
101265720	2.15246	6.69561e-16	0.224171	0.0407408	Known_gene	68136833	68139139	NC_015440.2	0.76	0.51	0.62	0.82	0.53	0.88	0.08	0.19	0.19	0.52	0.73	0.88	0.224171	0.0407408	0.217899	2.15246	6.69561e-16	4.16007e-15		K13434//pathogenesis-related genes transcriptional activator PTI6+ko04626//Plant-pathogen interaction
101265717	2.58756	8.62659e-18	-0.0417374	0.158067	Known_gene	66388299	66389295	NC_015440.2	0.29	0.34	0.23	0.24	0.34	0.25	0.1	0.38	0.46	1.73	2.15	1.74	-0.0417374	0.158067	0.931814	2.58756	8.62659e-18	5.18654e-17		K11592//endoribonuclease Dicer [EC:3.1.26.-]
101265701	2.79694	0	0.307899	7.62207e-07	Known_gene	40692706	40693865	NC_015439.2	7.42	9.32	11.75	1.09	9.21	25.41	3.35	7.34	2.85	27	27.19	44.32	0.307899	7.62207e-07	3.12551e-06	2.79694	0	0	GO:0065007//biological regulation;GO:0050896//response to stimulus;GO:0023052//signaling;GO:0050794//regulation of cellular process;GO:0000160//phosphorelay signal transduction system;GO:0051716//cellular response to stimulus;GO:0007165//signal transduction;GO:0007154//cell communication;GO:0050789//regulation of biological process;GO:0009987//cellular process;GO:0035556//intracellular signal tra…	K14492//two-component response regulator ARR-A family+ko04075//Plant hormone signal transduction;K14492//two-component response regulator ARR-A family+ko04075//Plant hormone signal transduction
101265658	2.52979	8.04391e-292	0.529839	7.09672e-14	Known_gene	58375938	58380105	NC_015444.2	3.22	2.72	2.07	4.88	2.86	3.59	1.58	1.44	1.7	5.47	14.76	5.89	0.529839	7.09672e-14	2.448e-13	2.52979	8.04391e-292	9.95227e-292		K19090//CRISPR-associated protein Cas5t;K19589//release factor glutamine methyltransferase [EC:2.1.1.297];K15271//ATP-dependent DNA helicase HFM1/MER3 [EC:3.6.4.12];K15271//ATP-dependent DNA helicase HFM1/MER3 [EC:3.6.4.12]
101265644	4.16126	3.03404e-13	0.799717	0.00111592	Known_gene	64636833	64639008	NC_015442.2	0.22	0.17	0.21	0.4	0.2	0.45	0.02	0.03	0	0.28	0.21	0.39	0.799717	0.00111592	0.00523781	4.16126	3.03404e-13	1.98012e-12		K07195//exocyst complex component 7
101265639	5.40108	9.37329e-12	0.555298	0.0490508	Known_gene	9773207	9774970	NC_015442.2	0.08	0.12	0.08	0.1	0.12	0.19	0	0.02	0	0.28	0.54	0	0.555298	0.0490508	0.265541	5.40108	9.37329e-12	6.31335e-11		K08900//mitochondrial chaperone BCS1
101265629	2.13916	1.52552e-104	0.869817	1.37018e-21	Known_gene	64535587	64539521	NC_015440.2	3.01	3.11	2.71	6.09	4.31	5.78	1.37	1.55	2.5	2.76	16.31	4.45	0.869817	1.37018e-21	4.11984e-21	2.13916	1.52552e-104	4.06233e-104		K08856//serine/threonine kinase 16 [EC:2.7.11.1]
101265518	2.58395	5.79255e-25	0.320833	0.0316091	Known_gene	36986836	36989629	NC_015449.2	0.61	0.67	0.25	0.24	0.26	1.44	0.38	0.13	0.12	1.04	1.3	1.49	0.320833	0.0316091	0.167234	2.58395	5.79255e-25	3.13929e-24		K04733//interleukin-1 receptor-associated kinase 4 [EC:2.7.11.1]
101265452	2.34621	0	0.719722	5.62843e-89	Known_gene	61593192	61594419	NC_015444.2	22.35	30.4	23.87	49.69	41.15	35.25	7.85	10.66	12.03	35.36	95.93	19.61	0.719722	5.62843e-89	8.91906e-89	2.34621	0	0		K12135//zinc finger protein CONSTANS+ko04712//Circadian rhythm - plant;K19720//collagen, type III, alpha+ko04933//AGE-RAGE signaling pathway in diabetic complications
101265428	3.99898	0.000827378	-1.54424	0.0582832	Known_gene	4335390	4336476	NC_015441.2	0	0.07	0.03	0	0	0.04	0	0	0	0	0.12	0.2	-1.54424	0.0582832	0.319175	3.99898	0.000827378	0.00727831		K12447//UDP-sugar pyrophosphorylase [EC:2.7.7.64]+ko00520//Amino sugar and nucleotide sugar metabolism+ko00040//Pentose and glucuronate interconversions+ko01100//Metabolic pathways+ko00052//Galactose metabolism+ko00053//Ascorbate and aldarate metabolism;K20777//exonuclease 3'-5' domain-containing protein 2 [EC:3.1.11.1];K05387//glutamate receptor, ionotropic, plant;K08237//hydroquinone glucosyltr…
101265383	4.99898	8.29576e-06	2.04072	0.00295709	Known_gene	61809352	61812123	NC_015447.2	0.04	0	0.02	0.08	0.09	0.09	0	0	0	0.09	0.17	0.09	2.04072	0.00295709	0.0142798	4.99898	8.29576e-06	6.61439e-05		K13436//pto-interacting protein 1 [EC:2.7.11.1]+ko04626//Plant-pathogen interaction
101265279	2.03342	2.59266e-87	-0.0138314	0.149711	Known_gene	66026230	66030803	NC_015446.2	2.98	3.23	2.12	3.14	2.21	2.94	1.25	0.83	1.39	4.75	4.83	4.59	-0.0138314	0.149711	0.879219	2.03342	2.59266e-87	7.71604e-87	GO:0006807//nitrogen compound metabolic process;GO:0016310//phosphorylation;GO:0044267//cellular protein metabolic process;GO:0006793//phosphorus metabolic process;GO:0009987//cellular process;GO:0006464//cellular protein modification process;GO:0019538//protein metabolic process;GO:0006468//protein phosphorylation;GO:0043170//macromolecule metabolic process;GO:1901564//organonitrogen compound me…	K04733//interleukin-1 receptor-associated kinase 4 [EC:2.7.11.1];K04733//interleukin-1 receptor-associated kinase 4 [EC:2.7.11.1]
101265215	3.65106	2.23952e-09			Known_gene	65808518	65810841	NC_015449.2	0	0	0	0	0.04	0	0	0.07	0.04	0.04	1.31	0				3.65106	2.23952e-09	1.59618e-08	GO:0051179//localization;GO:0051234//establishment of localization;GO:0016192//vesicle-mediated transport;GO:0006810//transport;GO:0044425//membrane part;GO:0031224//intrinsic component of membrane;GO:0016021//integral component of membrane;GO:0016020//membrane;	K08511//vesicle-associated membrane protein 72
101265180	8.68092	6.11137e-40			Known_gene	93357724	93360132	NC_015438.2	0	0	0	0	0	0	0	0	0	0	3.11	0				8.68092	6.11137e-40	2.7521e-39		K04733//interleukin-1 receptor-associated kinase 4 [EC:2.7.11.1]
101265169	2.10183	1.67884e-15	-0.334784	0.0252244	Known_gene	85395923	85397294	NC_015438.2	1.06	0.78	0.96	0.91	0.62	0.69	0.12	0.35	0.41	1.19	1.49	1.06	-0.334784	0.0252244	0.131935	2.10183	1.67884e-15	1.05108e-14
101265163	5.36155	6.77569e-07			Known_gene	71190689	71191685	NC_015438.2	0	0	0	0	0	0	0	0	0	0	0.88	0				5.36155	6.77569e-07	5.19897e-06	GO:0005488//binding;	K17895//GATA-binding protein 3
101265157	3.17652	4.89016e-56	0.998905	3.26547e-07	Known_gene	62998290	62999399	NC_015445.2	0.61	1.17	0.65	1.11	0.92	2.74	0.17	0.54	0.54	3.2	5.5	2.55	0.998905	3.26547e-07	1.32261e-06	3.17652	4.89016e-56	1.86876e-55
101265156	5.36155	6.77569e-07	2.62569	0.0087471	Known_gene	58166731	58167804	NC_015445.2	0	0.03	0	0.1	0.07	0.03	0	0	0	0	0.66	0	2.62569	0.0087471	0.0439835	5.36155	6.77569e-07	5.19897e-06		K04373//ribosomal protein S6 kinase alpha-1/2/3/6 [EC:2.7.11.1];K20716//mitogen-activated protein kinase kinase kinase 17/18+ko04016//MAPK signaling pathway - plant
101265127	3.57094	0	0.188215	0.0221278	Known_gene	64783268	64787009	NC_015441.2	2.19	2.44	2.59	2.58	1.79	2.72	0.12	1.3	2.22	4.21	33.9	5.01	0.188215	0.0221278	0.115258	3.57094	0	0		K08900//mitochondrial chaperone BCS1;K08900//mitochondrial chaperone BCS1;K08900//mitochondrial chaperone BCS1
101265119	2.12012	1.95686e-09	0.626709	0.000684187	Known_gene	7	1948	NW_004196200.1	0.3	0.5	0.5	0.59	0.41	1.04	0.05	0.07	0.15	0.35	0.49	0.34	0.626709	0.000684187	0.00317263	2.12012	1.95686e-09	1.39209e-08		K14513//ethylene-insensitive protein 2+ko04016//MAPK signaling pathway - plant+ko04075//Plant hormone signal transduction;K08247//methionine S-methyltransferase [EC:2.1.1.12]+ko00450//Selenocompound metabolism;K18158//nuclear control of ATPase protein 2;K13356//alcohol-forming fatty acyl-CoA reductase [EC:1.2.1.84]+ko04146//Peroxisome+ko00073//Cutin, suberine and wax biosynthesis;K01652//acetolac…
101265066	2.07772	1.49132e-202	0.969005	5.27851e-72	Known_gene	78433459	78440979	NC_015438.2	4.17	3.88	4.07	9.38	6.26	8.12	1.7	1.93	2.02	7.45	7.51	9.22	0.969005	5.27851e-72	9.45603e-72	2.07772	1.49132e-202	2.45193e-202	GO:0007165//signal transduction;GO:0071704//organic substance metabolic process;GO:0065007//biological regulation;GO:1901564//organonitrogen compound metabolic process;GO:0016310//phosphorylation;GO:0007154//cell communication;GO:0050794//regulation of cellular process;GO:0006468//protein phosphorylation;GO:0007166//cell surface receptor signaling pathway;GO:0044237//cellular metabolic process;GO…	K04733//interleukin-1 receptor-associated kinase 4 [EC:2.7.11.1];K04733//interleukin-1 receptor-associated kinase 4 [EC:2.7.11.1];K04733//interleukin-1 receptor-associated kinase 4 [EC:2.7.11.1];K04733//interleukin-1 receptor-associated kinase 4 [EC:2.7.11.1];K13430//serine/threonine-protein kinase PBS1 [EC:2.7.11.1]+ko04626//Plant-pathogen interaction
101265018	2.50633	6.91923e-32	0.818332	0.0419298	Known_gene	3666136	3667574	NC_015441.2	0.06	0	0.13	0.11	0.11	0.12	0.25	0.33	0.56	1.85	2.92	1.61	0.818332	0.0419298	0.224627	2.50633	6.91923e-32	3.41929e-31
101264970	3.36155	0.000493037	2.36265	0.016206	Known_gene	50133732	50137055	NC_015446.2	0.01	0	0	0.02	0.02	0.01	0.01	0	0	0.01	0.09	0.02	2.36265	0.016206	0.0833257	3.36155	0.000493037	0.00427847		K00924//
101264962	2.96148	4.02334e-36	0.314648	0.0174302	Known_gene	754289	755889	NC_015438.2	1.38	1.08	0.69	1.41	1.51	0.98	0.32	0.23	0.28	1.68	2.33	2.57	0.314648	0.0174302	0.0898549	2.96148	4.02334e-36	1.89054e-35		K14823//rRNA-processing protein EBP2
101264909	2.56674	2.84463e-207	0.916467	1.28109e-20	Known_gene	65811051	65813180	NC_015449.2	3.07	3.27	2.71	6.73	4.29	6.09	2.26	2.5	3.14	5.61	32.22	8.38	0.916467	1.28109e-20	3.91326e-20	2.56674	2.84463e-207	4.59891e-207		K08235//xyloglucan:xyloglucosyl transferase [EC:2.4.1.207];K04733//interleukin-1 receptor-associated kinase 4 [EC:2.7.11.1];K16219//protein N-terminal methyltransferase [EC:2.1.1.244]
101264774	2.63365	0	-0.425229	3.37975e-23	Known_gene	52515320	52518967	NC_015439.2	8.93	23.63	6.67	10.13	7.41	11.49	2.76	3.67	5.76	12.95	45.67	15.81	-0.425229	3.37975e-23	9.90754e-23	2.63365	0	0		K12261//2-hydroxyacyl-CoA lyase 1 [EC:4.1.-.-]+ko04146//Peroxisome
101264773	2.5799	1.18486e-29	-0.2901	0.0263377	Known_gene	53393185	53395538	NC_015439.2	0.35	1.01	0.67	0.92	0.24	0.5	0.17	0.13	0.29	0.68	1.39	1.53	-0.2901	0.0263377	0.138055	2.5799	1.18486e-29	6.03494e-29		K00512//steroid 17alpha-monooxygenase / 17alpha-hydroxyprogesterone deacetylase [EC:1.14.14.19 1.14.14.32]+ko01100//Metabolic pathways;K15472//premnaspirodiene oxygenase [EC:1.14.13.121]+ko00909//Sesquiterpenoid and triterpenoid biosynthesis+ko01110//Biosynthesis of secondary metabolites;K07418//cytochrome P450 family 2 subfamily J [EC:1.14.14.1]+ko00591//Linoleic acid metabolism+ko00590//Arachid…
101264761	2.56726	1.11182e-304	0.84995	8.6342e-41	Known_gene	86249509	86253460	NC_015438.2	5.69	8.98	7.67	15.56	10.09	13.95	2.74	3.88	5	18.66	22.01	27.8	0.84995	8.6342e-41	2.04389e-40	2.56726	1.11182e-304	1.32955e-304	GO:0046872//metal ion binding;GO:0005488//binding;GO:0043169//cation binding;GO:0008270//zinc ion binding;GO:0046914//transition metal ion binding;GO:0043167//ion binding;	K19043//E3 ubiquitin-protein ligase RHF [EC:2.3.2.27];K00469//inositol oxygenase [EC:1.13.99.1]+ko00053//Ascorbate and aldarate metabolism+ko00562//Inositol phosphate metabolism
101264700	2.09281	0	0.53058	1.2771e-134	Known_gene	54307516	54311101	NC_015448.2	48.73	42.37	51.98	77.62	47.67	83.44	10.19	25.03	40.16	35.32	228.2	50.6	0.53058	1.2771e-134	1.54932e-134	2.09281	0	0	GO:1901576//organic substance biosynthetic process;GO:0019538//protein metabolic process;GO:1901566//organonitrogen compound biosynthetic process;GO:0006412//translation;GO:0009058//biosynthetic process;GO:0044271//cellular nitrogen compound biosynthetic process;GO:0044260//cellular macromolecule metabolic process;GO:0044237//cellular metabolic process;GO:0010467//gene expression;GO:0034641//cell…	K03231//elongation factor 1-alpha+ko03013//RNA transport;K03231//elongation factor 1-alpha+ko03013//RNA transport
101264604	4.89207	2.8319e-15	-0.696241	0.0894199	Known_gene	54701242	54703423	NC_015440.2	0.03	0.02	0.03	0	0	0.05	0	0.03	0	0.21	0.26	0.61	-0.696241	0.0894199	0.501835	4.89207	2.8319e-15	1.78149e-14	GO:0046323//glucose import;GO:0008643//carbohydrate transport;GO:0006818//hydrogen transport;GO:0015749//monosaccharide transport;GO:0051234//establishment of localization;GO:0015758//glucose transport;GO:0015672//monovalent inorganic cation transport;GO:0006812//cation transport;GO:0034219//carbohydrate transmembrane transport;GO:0006810//transport;GO:1904659//glucose transmembrane transport;GO:…	K16055//trehalose 6-phosphate synthase/phosphatase [EC:2.4.1.15 3.1.3.12]+ko01100//Metabolic pathways+ko00500//Starch and sucrose metabolism;K08150//MFS transporter, SP family, solute carrier family 2 (myo-inositol transporter), member 13
101264593	2.34861	6.27764e-192	0.802377	3.76862e-28	Known_gene	1232993	1241612	NC_015440.2	2.14	2.65	2.57	6.08	2.64	4.21	1.32	1.4	1.28	3.48	13.72	3.01	0.802377	3.76862e-28	1.03211e-27	2.34861	6.27764e-192	1.07828e-191		K08869//aarF domain-containing kinase;K08869//aarF domain-containing kinase
101264582	2.20498	8.88824e-05	0.96871	2.02073e-44	Known_gene	2294001	2297487	NC_015448.2	7.37	8.17	7.63	19.58	11.25	17.04	0.09	0.04	0.08	0.19	0.63	0.05	0.96871	2.02073e-44	4.62347e-44	2.20498	8.88824e-05	0.000741026
101264509	2.01606	4.43842e-12	0.283996	0.056679	Known_gene	6902260	6909207	NC_015441.2	0.25	0.31	0.31	0.36	0.4	0.3	0.13	0.07	0.25	0.08	1.6	0.02	0.283996	0.056679	0.309455	2.01606	4.43842e-12	2.96834e-11
101264284	3.29597	8.5992e-11	0.625687	0.0382715	Known_gene	687892	691096	NC_015448.2	0.06	0.12	0.03	0.12	0.06	0.14	0	0.01	0.06	0.23	0.28	0.22	0.625687	0.0382715	0.204113	3.29597	8.5992e-11	5.91349e-10		K11717//cysteine desulfurase / selenocysteine lyase [EC:2.8.1.7 4.4.1.16]+ko00450//Selenocompound metabolism+ko01100//Metabolic pathways
101264242	2.13634	5.74591e-180	0.71387	9.62818e-21	Known_gene	13959150	13962316	NC_015438.2	1.7	2.64	2.48	5.02	2.8	3.21	1.4	1.56	1.98	3.17	14.57	3.44	0.71387	9.62818e-21	2.93443e-20	2.13634	5.74591e-180	1.0387e-179	GO:0051716//cellular response to stimulus;GO:1903506//regulation of nucleic acid-templated transcription;GO:0009873//ethylene-activated signaling pathway;GO:2000112//regulation of cellular macromolecule biosynthetic process;GO:0010035//response to inorganic substance;GO:0009723//response to ethylene;GO:0010038//response to metal ion;GO:0010468//regulation of gene expression;GO:0035556//intracellu…	K14514//ethylene-insensitive protein 3+ko04016//MAPK signaling pathway - plant+ko04075//Plant hormone signal transduction;K14514//ethylene-insensitive protein 3+ko04016//MAPK signaling pathway - plant+ko04075//Plant hormone signal transduction;K14514//ethylene-insensitive protein 3+ko04016//MAPK signaling pathway - plant+ko04075//Plant hormone signal transduction
101264120	3.36155	2.47013e-11	0.567972	0.0147121	Known_gene	5682956	5684590	NC_015442.2	0.08	0.36	0.26	0.44	0.29	0.31	0	0.02	0.09	0.38	0.37	0.35	0.567972	0.0147121	0.0753058	3.36155	2.47013e-11	1.67909e-10		K20718//LRR receptor-like serine/threonine-protein kinase ERECTA [EC:2.7.11.1]+ko04016//MAPK signaling pathway - plant
101264095	2.39491	4.99129e-27	0.978261	1.41878e-18	Known_gene	1101014	1105193	NC_015449.2	4.21	2.79	2.47	8.92	3.72	6.04	0.37	0.56	0.65	2.41	2.73	3.33	0.978261	1.41878e-18	4.49027e-18	2.39491	4.99129e-27	2.6296e-26		K10418//dynein light chain LC8-type
101264089	2.19163	5.50782e-10	0.0407248	0.159415	Known_gene	34835202	34837547	NC_015439.2	0.04	0.11	0.14	0.1	0.06	0.13	0.02	0.04	0.27	0.4	0.54	0.55	0.0407248	0.159415	0.940462	2.19163	5.50782e-10	3.86146e-09	GO:0055085//transmembrane transport;GO:0006810//transport;GO:0051179//localization;GO:0051234//establishment of localization;GO:0031224//intrinsic component of membrane;GO:0016020//membrane;GO:0044425//membrane part;GO:0016021//integral component of membrane;GO:0022857//transmembrane transporter activity;GO:0005215//transporter activity;	K08150//MFS transporter, SP family, solute carrier family 2 (myo-inositol transporter), member 13;K08150//MFS transporter, SP family, solute carrier family 2 (myo-inositol transporter), member 13;K08150//MFS transporter, SP family, solute carrier family 2 (myo-inositol transporter), member 13
101264072	2.65106	0.000556402	1.04072	0.0706647	Known_gene	2465837	2467659	NC_015447.2	0	0.08	0	0.04	0.04	0.08	0.04	0.04	0	0.04	0.38	0.05	1.04072	0.0706647	0.390944	2.65106	0.000556402	0.00484475
101264037	2.26845	5.30141e-91	0.891743	5.03258e-17	Known_gene	2918321	2922655	NC_015445.2	3.04	3.63	3.13	6.24	5.83	6.76	1.73	2.25	2.22	9.07	12.48	8.96	0.891743	5.03258e-17	1.63842e-16	2.26845	5.30141e-91	1.53385e-90	GO:0046872//metal ion binding;GO:0043167//ion binding;GO:0005488//binding;GO:0043169//cation binding;
101263961	2.28106	7.27057e-51	-0.662882	3.86761e-05	Known_gene	48944553	48947159	NC_015439.2	1.14	1.02	0.44	0.56	0.37	0.71	0.17	0.5	0.68	2.59	1.62	2.31	-0.662882	3.86761e-05	0.000169166	2.28106	7.27057e-51	2.91995e-50		K04733//interleukin-1 receptor-associated kinase 4 [EC:2.7.11.1]
101263938	3.99898	0.000827378	2.04072	0.00902587	Known_gene	88315959	88317882	NC_015438.2	0	0.03	0.03	0.12	0.03	0.1	0	0	0	0.13	0	0.12	2.04072	0.00902587	0.0454423	3.99898	0.000827378	0.00727831
101263936	2.32573	1.01298e-34	-0.681435	0.00175272	Known_gene	84285607	84298647	NC_015438.2	0.16	0.45	0.45	0.17	0.2	0.36	0.15	0.18	0.33	0.38	5.08	0.39	-0.681435	0.00175272	0.00833089	2.32573	1.01298e-34	4.83437e-34	GO:0044260//cellular macromolecule metabolic process;GO:0044237//cellular metabolic process;GO:0006974//cellular response to DNA damage stimulus;GO:0043170//macromolecule metabolic process;GO:1901360//organic cyclic compound metabolic process;GO:0033554//cellular response to stress;GO:0050896//response to stimulus;GO:0044238//primary metabolic process;GO:0006259//DNA metabolic process;GO:0090304/…	K20092//chromodomain-helicase-DNA-binding protein 1-like [EC:3.6.4.12];K20092//chromodomain-helicase-DNA-binding protein 1-like [EC:3.6.4.12]
101263926	2.54067	3.03044e-195	-0.959275	4.75125e-14	Known_gene	65670213	65673755	NC_015445.2	1.5	2.73	3.04	0.93	0.79	2.09	0.86	2.05	2.61	9.64	11.97	10.49	-0.959275	4.75125e-14	1.63384e-13	2.54067	3.03044e-195	5.13619e-195		K01761//methionine-gamma-lyase [EC:4.4.1.11]+ko00450//Selenocompound metabolism+ko00270//Cysteine and methionine metabolism
101263872	4.23602	4.48511e-10	-0.975577	3.553e-05	Known_gene	53266776	53269372	NC_015448.2	0.58	0.99	1.11	0.06	0.43	0.91	0	0.06	0	0.26	0.38	0.59	-0.975577	3.553e-05	0.000155122	4.23602	4.48511e-10	3.13726e-09	GO:0065007//biological regulation;GO:0031326//regulation of cellular biosynthetic process;GO:2001141//regulation of RNA biosynthetic process;GO:0031323//regulation of cellular metabolic process;GO:1903506//regulation of nucleic acid-templated transcription;GO:0009889//regulation of biosynthetic process;GO:0080090//regulation of primary metabolic process;GO:0010468//regulation of gene expression;G…	K12581//CCR4-NOT transcription complex subunit 7/8+ko03018//RNA degradation;K13126//polyadenylate-binding protein+ko03015//mRNA surveillance pathway+ko03018//RNA degradation+ko03013//RNA transport;K03094//S-phase kinase-associated protein 1+ko04141//Protein processing in endoplasmic reticulum+ko04120//Ubiquitin mediated proteolysis;K01054//acylglycerol lipase [EC:3.1.1.23]+ko01100//Metabolic path…
101263857	3.80044	1.01767e-81	1.18757	0.00166284	Known_gene	95824718	95826739	NC_015438.2	0.1	0.03	0.1	0.15	0.19	0.2	0.02	0.18	0.32	2.84	1.33	3.13	1.18757	0.00166284	0.00788812	3.80044	1.01767e-81	3.14198e-81		K20506//tuliposide A-converting enzyme [EC:4.2.99.22];K13258//2-hydroxyisoflavanone dehydratase [EC:4.2.1.105]+ko01110//Biosynthesis of secondary metabolites+ko00943//Isoflavonoid biosynthesis
101263854	2.39326	1.49398e-05	1.80626	0.00151783	Known_gene	1939716	1941593	NC_015447.2	0.19	0	0.05	0.19	0.2	0.47	0.1	0	0.16	0.36	0.6	0.34	1.80626	0.00151783	0.00718311	2.39326	1.49398e-05	0.000120302
101263758	2.0709	1.77101e-49	0.433797	0.000464716	Known_gene	70121149	70125675	NC_015446.2	1.65	0.81	1.52	1.54	2.02	1.91	0.8	0.77	0.93	0.97	7.86	1.31	0.433797	0.000464716	0.00213563	2.0709	1.77101e-49	7.21345e-49
101263718	3.27909	1.27422e-05	4.04072	0.00108591	Known_gene	45896226	45897251	NC_015443.2	0	0	0	0.08	0.08	0.17	0	0.08	0	0.26	0.37	0.17	4.04072	0.00108591	0.00509514	3.27909	1.27422e-05	0.000102249		K11855//ubiquitin carboxyl-terminal hydrolase 36/42 [EC:3.4.19.12]
101263667	2.17976	3.92052e-93	0.660176	3.65254e-09	Known_gene	40487942	40492994	NC_015439.2	0.46	0.85	0.48	0.62	0.85	1.37	0.39	0.58	0.38	1.57	1.98	2.76	0.660176	3.65254e-09	1.40065e-08	2.17976	3.92052e-93	1.12255e-92		K13420//LRR receptor-like serine/threonine-protein kinase FLS2 [EC:2.7.11.1]+ko04626//Plant-pathogen interaction+ko04016//MAPK signaling pathway - plant
101263609	3.19163	0.000954873	3.62569	0.00396452	Known_gene	3950896	3954348	NC_015442.2	0	0	0	0.05	0	0.03	0.01	0	0	0.1	0	0.02	3.62569	0.00396452	0.0193431	3.19163	0.000954873	0.00844485	GO:0050896//response to stimulus;GO:0006950//response to stress;GO:0006952//defense response;GO:0030554//adenyl nucleotide binding;GO:0017076//purine nucleotide binding;GO:0032559//adenyl ribonucleotide binding;GO:1901265//nucleoside phosphate binding;GO:0005488//binding;GO:0043531//ADP binding;GO:0036094//small molecule binding;GO:0032555//purine ribonucleotide binding;GO:0097159//organic cyclic…	K13457//disease resistance protein RPM1+ko04626//Plant-pathogen interaction;K13453//disease resistance protein+ko04626//Plant-pathogen interaction
101263513	3.59568	2.56678e-27	-1.59388	0.0239061	Known_gene	5575853	5587718	NC_015442.2	0.1	0	0.03	0.03	0	0.03	0.06	0.05	0.12	0.49	1.16	1.15	-1.59388	0.0239061	0.124856	3.59568	2.56678e-27	1.34683e-26	GO:0008168//methyltransferase activity;GO:0003824//catalytic activity;GO:0016741//transferase activity, transferring one-carbon groups;GO:0016740//transferase activity;	K17868//diphthine methyl ester acylhydrolase [EC:3.1.1.97];K17868//diphthine methyl ester acylhydrolase [EC:3.1.1.97];K17868//diphthine methyl ester acylhydrolase [EC:3.1.1.97];K17868//diphthine methyl ester acylhydrolase [EC:3.1.1.97];K17868//diphthine methyl ester acylhydrolase [EC:3.1.1.97]
101263475	5.83549	1.00646e-08	1.04072	0.096168	Known_gene	89303518	89308234	NC_015438.2	0	0	0.02	0	0.02	0.02	0	0	0	0	0.44	0.05	1.04072	0.096168	0.544095	5.83549	1.00646e-08	7.29064e-08		K01051//pectinesterase [EC:3.1.1.11]+ko00040//Pentose and glucuronate interconversions+ko01100//Metabolic pathways
101263458	3.73595	6.28584e-10	0.894335	2.86336e-05	Known_gene	60618537	60622600	NC_015446.2	0.31	0.38	0.28	0.22	1.12	0.45	0.03	0.02	0	0.31	0.17	0.21	0.894335	2.86336e-05	0.000124462	3.73595	6.28584e-10	4.4118e-09		K01728//pectate lyase [EC:4.2.2.2]+ko00040//Pentose and glucuronate interconversions
101263371	2.99898	4.2957e-06			Known_gene	584915	589089	NC_015448.2	0.03	0.02	0	0	0	0	0.03	0.02	0	0	0.41	0				2.99898	4.2957e-06	3.3877e-05		K13172//serine/arginine repetitive matrix protein 2;K13172//serine/arginine repetitive matrix protein 2
101263358	5.83549	1.00646e-08			Known_gene	17648688	17652961	NC_015439.2	0	0	0	0	0.02	0	0	0	0	0	0.62	0				5.83549	1.00646e-08	7.29064e-08
101263330	2.41402	0.000299422	0.500156	0.0811206	Known_gene	3574842	3577907	NC_015444.2	0.03	0.01	0.04	0.02	0.07	0.03	0	0.01	0.02	0.05	0.07	0.06	0.500156	0.0811206	0.452737	2.41402	0.000299422	0.00256654		K13466//EIX receptor 1/2+ko04626//Plant-pathogen interaction;K04567//lysyl-tRNA synthetase, class II [EC:6.1.1.6]+ko00970//Aminoacyl-tRNA biosynthesis;K13465//ethylene-1,4-beta-xylanase [EC:3.2.1.8]+ko04626//Plant-pathogen interaction
101263187	3.99898	1.82258e-05	0.751218	0.0316063	Known_gene	5569686	5576546	NC_015449.2	0.05	0.05	0.04	0.1	0.08	0.05	0.01	0	0	0.07	0.07	0.07	0.751218	0.0316063	0.16721	3.99898	1.82258e-05	0.000147337		K01126//glycerophosphoryl diester phosphodiesterase [EC:3.1.4.46]+ko00564//Glycerophospholipid metabolism
101263169	2.02275	6.76445e-20	0.496719	6.14746e-05	Known_gene	89228159	89231098	NC_015438.2	1.22	0.46	0.83	1.58	0.87	1.09	0.17	0.29	0.11	1.06	0.55	0.75	0.496719	6.14746e-05	0.000271083	2.02275	6.76445e-20	3.93951e-19		K10523//speckle-type POZ protein
101263110	2.45496	0	0.69013	3.14023e-25	Known_gene	62936180	62940814	NC_015441.2	4.72	4.19	3.18	6.39	4.79	7.8	2.95	3.56	3.22	10.52	12.99	22.05	0.69013	3.14023e-25	8.93601e-25	2.45496	0	0	GO:0031224//intrinsic component of membrane;GO:0016021//integral component of membrane;GO:0016020//membrane;GO:0044425//membrane part;GO:1901567//fatty acid derivative binding;GO:0048037//cofactor binding;GO:0043167//ion binding;GO:0043168//anion binding;GO:1901681//sulfur compound binding;GO:0050662//coenzyme binding;GO:0000062//fatty-acyl-CoA binding;GO:0005488//binding;	K08762//diazepam-binding inhibitor (GABA receptor modulator, acyl-CoA-binding protein);K08762//diazepam-binding inhibitor (GABA receptor modulator, acyl-CoA-binding protein);K14306//nuclear pore complex protein Nup62+ko03013//RNA transport;K14306//nuclear pore complex protein Nup62+ko03013//RNA transport;K14306//nuclear pore complex protein Nup62+ko03013//RNA transport;K14306//nuclear pore comple…
101263048	3.99898	0.000827378			Known_gene	59224093	59226900	NC_015445.2	0	0.03	0.1	0	0	0	0	0	0	0.07	0.12	0.1				3.99898	0.000827378	0.00727831		K19882//O-palmitoleoyl-L-serine hydrolase [EC:3.1.1.98]
101263033	2.08471	1.47892e-08	-0.0588109	0.155006	Known_gene	33260165	33263253	NC_015443.2	0.01	0.09	0.06	0.06	0.04	0.06	0.15	0	0.01	0.11	0.47	0.08	-0.0588109	0.155006	0.91262	2.08471	1.47892e-08	1.07628e-07	GO:0009987//cellular process;GO:0019538//protein metabolic process;GO:0006796//phosphate-containing compound metabolic process;GO:0006468//protein phosphorylation;GO:0043170//macromolecule metabolic process;GO:0006464//cellular protein modification process;GO:0043412//macromolecule modification;GO:0044238//primary metabolic process;GO:0071704//organic substance metabolic process;GO:0008152//metab…	K20359//PRA1 family protein 1;K04733//interleukin-1 receptor-associated kinase 4 [EC:2.7.11.1]
101263029	2.32979	2.62483e-05	1.7215	0.00241003	Known_gene	3242310	3247843	NC_015443.2	0	0.02	0.02	0.02	0.1	0.02	0	0.03	0.01	0.06	0.03	0.13	1.7215	0.00241003	0.0115787	2.32979	2.62483e-05	0.000213428		K05658//ATP-binding cassette, subfamily B (MDR/TAP), member 1 [EC:3.6.3.44]+ko02010//ABC transporters
101262968	3.65106	0.000131291	1.52615	0.00615271	Known_gene	86093037	86098767	NC_015438.2	0.06	0.02	0.02	0.16	0.06	0.06	0	0	0.02	0.06	0.09	0.11	1.52615	0.00615271	0.0304846	3.65106	0.000131291	0.00110417
101262936	3.02399	0	0.212809	0.000735394	Known_gene	65425159	65427703	NC_015444.2	3	3.57	3.15	3.64	3.04	4.64	1.52	0.95	1.4	10.5	7.35	14.46	0.212809	0.000735394	0.00341857	3.02399	0	0
101262917	2.84371	7.19381e-10	0.594323	0.00241003	Known_gene	65210406	65212037	NC_015442.2	0.29	0.65	0.42	0.77	0.45	0.85	0.09	0.02	0.05	0.24	0.65	0.25	0.594323	0.00241003	0.0115791	2.84371	7.19381e-10	5.05466e-09
101262832	2.54389	0.000227285			Known_gene	54944803	54945201	NC_015444.2	0	0	0	0.19	0.1	0.1	0.1	0.17	0	0.42	0.44	0.82				2.54389	0.000227285	0.00193374		K20098//DNA excision repair protein ERCC-6-like 2 [EC:3.6.4.-]
101262770	4.99898	8.29576e-06	1.04072	0.096168	Known_gene	499254	501198	NC_015448.2	0	0.02	0	0.02	0.02	0	0	0	0	0	0.29	0	1.04072	0.096168	0.544095	4.99898	8.29576e-06	6.61439e-05
101262672	3.63059	6.30975e-07	-3.54424	0.0045365	Known_gene	95782767	95785234	NC_015438.2	0.12	0	0	0	0	0	0	0	0.04	0.19	0.18	0.11	-3.54424	0.0045365	0.0222361	3.63059	6.30975e-07	4.83525e-06		K16297//serine carboxypeptidase-like clade II [EC:3.4.16.-]
101262668	2.12837	0	0.336537	8.44231e-29	Known_gene	95402135	95406731	NC_015438.2	17.05	34.6	16.9	18.82	19.86	46.41	25.73	28.22	30.83	87.98	110.59	185.37	0.336537	8.44231e-29	2.29236e-28	2.12837	0	0	GO:0003824//catalytic activity;GO:0016874//ligase activity;	K01969//3-methylcrotonyl-CoA carboxylase beta subunit [EC:6.4.1.4]+ko00280//Valine, leucine and isoleucine degradation+ko01100//Metabolic pathways;K01969//3-methylcrotonyl-CoA carboxylase beta subunit [EC:6.4.1.4]+ko00280//Valine, leucine and isoleucine degradation+ko01100//Metabolic pathways;K01969//3-methylcrotonyl-CoA carboxylase beta subunit [EC:6.4.1.4]+ko00280//Valine, leucine and isoleucin…
101262645	2.72392	0	0.733684	2.87754e-95	Known_gene	1769572	1771531	NC_015438.2	13.55	12.43	18.36	33.28	20.32	20.35	3.65	5.58	8.22	10.21	95.04	5.22	0.733684	2.87754e-95	4.36365e-95	2.72392	0	0
101262614	3.58798	3.62598e-188	0.724387	1.02175e-11	Known_gene	63872058	63873601	NC_015441.2	1.17	2.74	2.09	1.7	2.82	5.58	0.2	0.44	1.32	6.6	6.74	10.53	0.724387	1.02175e-11	3.68351e-11	3.58798	3.62598e-188	6.34452e-188
101262598	3.99898	0.000827378	1.62569	0.0540263	Known_gene	21311670	21314581	NC_015440.2	0	0	0.01	0.03	0	0.02	0	0	0	0.02	0.09	0.02	1.62569	0.0540263	0.294318	3.99898	0.000827378	0.00727831		K13356//alcohol-forming fatty acyl-CoA reductase [EC:1.2.1.84]+ko04146//Peroxisome+ko00073//Cutin, suberine and wax biosynthesis
101262585	4.54918	2.78831e-12	0.263117	0.100376	Known_gene	7921291	7925767	NC_015448.2	0.08	0.07	0.05	0.13	0.07	0.03	0	0	0.02	0.08	0.36	0.08	0.263117	0.100376	0.569585	4.54918	2.78831e-12	1.85496e-11		K21278//dual specificity protein phosphatase 1 [EC:3.1.3.16 3.1.3.48];K13216//nuclear inhibitor of protein phosphatase 1 [EC:3.1.4.-]
101262524	2.67706	8.10821e-07	0.834274	0.013552	Known_gene	34138743	34143002	NC_015443.2	0.08	0.05	0.1	0.15	0.08	0.18	0.03	0.05	0	0.13	0.26	0.11	0.834274	0.013552	0.0691838	2.67706	8.10821e-07	6.23274e-06		K02178//checkpoint serine/threonine-protein kinase [EC:2.7.11.1]
101262494	5.78558	1.66204e-08			Known_gene	51480761	51482698	NC_015440.2	0	0	0	0	0	0	0	0	0	0	0.56	0				5.78558	1.66204e-08	1.21083e-07		K03469//ribonuclease HI [EC:3.1.26.4]+ko03030//DNA replication;K07478//putative ATPase;K16251//DNA-directed RNA polymerase V subunit 1 [EC:2.7.7.6];K01051//pectinesterase [EC:3.1.1.11]+ko00040//Pentose and glucuronate interconversions+ko01100//Metabolic pathways
101262472	2.56174	6.05501e-44	0.970564	6.07781e-13	Known_gene	48110991	48114239	NC_015439.2	0.76	0.73	0.84	1.41	1.73	1.44	0.26	0.33	0.22	1.3	1.62	1.96	0.970564	6.07781e-13	2.13664e-12	2.56174	6.05501e-44	2.60291e-43	GO:0061512//protein localization to cilium;GO:0034613//cellular protein localization;GO:0033036//macromolecule localization;GO:0070727//cellular macromolecule localization;GO:0051641//cellular localization;GO:0008104//protein localization;GO:0051179//localization;GO:0033365//protein localization to organelle;GO:0042995//cell projection;GO:0005623//cell;GO:0005929//cilium;GO:0044464//cell part;GO:…	K19600//tubby-related protein 1
101262463	3.77659	6.7797e-05			Known_gene	16642257	16649045	NC_015439.2	0	0	0.01	0	0	0	0	0	0.01	0.11	0.04	0.02				3.77659	6.7797e-05	0.000562812		K01126//glycerophosphoryl diester phosphodiesterase [EC:3.1.4.46]+ko00564//Glycerophospholipid metabolism;K01126//glycerophosphoryl diester phosphodiesterase [EC:3.1.4.46]+ko00564//Glycerophospholipid metabolism
101262366	2.66294	4.38056e-12	1.17001	0.00112356	Known_gene	95770347	95771602	NC_015438.2	0.19	0.03	0.21	0.08	0.44	0.47	0.03	0.08	0.2	0.76	0.34	0.92	1.17001	0.00112356	0.0052746	2.66294	4.38056e-12	2.92829e-11
101262357	2.5353	9.1307e-14			Known_gene	3834486	3837040	NC_015447.2	0	0	0	0	0	0	0.03	0.09	0.15	0.69	0.35	0.58				2.5353	9.1307e-14	5.89991e-13		K14506//jasmonic acid-amino synthetase+ko04075//Plant hormone signal transduction
101262329	3.27909	1.27422e-05	-1.16091	0.00541412	Known_gene	66232482	66236289	NC_015444.2	0.09	0.15	0.18	0.07	0.04	0.08	0	0.04	0	0.04	0.23	0.1	-1.16091	0.00541412	0.0266941	3.27909	1.27422e-05	0.000102249		K01188//beta-glucosidase [EC:3.2.1.21]+ko01100//Metabolic pathways+ko00500//Starch and sucrose metabolism+ko01110//Biosynthesis of secondary metabolites+ko00460//Cyanoamino acid metabolism+ko00940//Phenylpropanoid biosynthesis
101262272	3.77659	6.7797e-05	1.62569	0.0540263	Known_gene	65074262	65077990	NC_015447.2	0	0.02	0	0	0.02	0.03	0	0	0.02	0.03	0.11	0.09	1.62569	0.0540263	0.294318	3.77659	6.7797e-05	0.000562812		K10523//speckle-type POZ protein;K10523//speckle-type POZ protein
101262261	3.36997	1.55436e-36	0.851569	4.57373e-08	Known_gene	94620475	94621980	NC_015438.2	0.94	0.99	1.49	1.76	1.64	2.89	0.24	0.21	0.13	1.6	1.56	3.04	0.851569	4.57373e-08	1.80735e-07	3.36997	1.55436e-36	7.26438e-36
101262216	2.11763	0.000140004	1.24236	0.00364794	Known_gene	61472253	61474497	NC_015442.2	0.12	0.03	0.02	0.18	0.1	0.11	0.03	0.03	0.02	0.11	0.11	0.16	1.24236	0.00364794	0.0177192	2.11763	0.000140004	0.00117898		K20298//vacuolar protein sorting-associated protein 52
101262190	2.15585	0.000642379	2.12263	0.023492	Known_gene	51489028	51492374	NC_015440.2	0.02	0	0	0.05	0.05	0	0.05	0.03	0	0.14	0.18	0.03	2.12263	0.023492	0.12265	2.15585	0.000642379	0.00561499		K00699//glucuronosyltransferase [EC:2.4.1.17]+ko00860//Porphyrin and chlorophyll metabolism+ko00040//Pentose and glucuronate interconversions+ko01100//Metabolic pathways+ko00053//Ascorbate and aldarate metabolism+ko01110//Biosynthesis of secondary metabolites;K13493//cytokinin-N-glucosyltransferase [EC:2.4.1.-]+ko00908//Zeatin biosynthesis+ko01110//Biosynthesis of secondary metabolites
101262166	2.41372	0	0.936279	5.81547e-64	Known_gene	47042344	47044232	NC_015439.2	6.35	6.8	9.11	13.17	12.72	17.21	6.18	5.51	4.32	16.13	52.27	16.15	0.936279	5.81547e-64	1.10848e-63	2.41372	0	0		K04733//interleukin-1 receptor-associated kinase 4 [EC:2.7.11.1]
101262153	2.43525	4.0413e-74	0.600152	1.1498e-08	Known_gene	96283606	96286512	NC_015438.2	2.34	3.73	1.78	3.86	3.7	4.31	0.89	1.31	0.77	4.38	6.41	5.67	0.600152	1.1498e-08	4.45879e-08	2.43525	4.0413e-74	1.32428e-73	GO:0003824//catalytic activity;GO:0008168//methyltransferase activity;GO:0016741//transferase activity, transferring one-carbon groups;GO:0016740//transferase activity;	K20177//vacuolar protein sorting-associated protein 3
101262131	2.28893	2.48474e-51	0.657396	1.37952e-07	Known_gene	62774647	62779471	NC_015444.2	0.67	1.12	0.69	1.3	1.51	1.11	0.1	0.52	0.52	1.51	1.44	2.78	0.657396	1.37952e-07	5.52562e-07	2.28893	2.48474e-51	9.94169e-51		K14763//H/ACA ribonucleoprotein complex non-core subunit NAF1;K14763//H/ACA ribonucleoprotein complex non-core subunit NAF1
101262036	2.09727	1.17085e-139	0.353015	4.99294e-08	Known_gene	1800913	1801892	NC_015438.2	8.32	11.05	9.31	12.39	10.17	14.34	3.42	3.7	4.14	14.7	15.67	18.77	0.353015	4.99294e-08	1.97547e-07	2.09727	1.17085e-139	2.5457e-139
101262005	2.22039	9.16541e-254	-0.64951	1.18779e-17	Known_gene	1078938	1081173	NC_015441.2	4.91	7.86	6.14	1.74	3.11	6.32	2.4	3.54	4.53	10.63	12.88	28.32	-0.64951	1.18779e-17	3.82291e-17	2.22039	9.16541e-254	1.25545e-253	GO:0044425//membrane part;GO:0016021//integral component of membrane;GO:0031224//intrinsic component of membrane;GO:0016020//membrane;GO:1901363//heterocyclic compound binding;GO:0035639//purine ribonucleoside triphosphate binding;GO:1901265//nucleoside phosphate binding;GO:0005488//binding;GO:0097159//organic cyclic compound binding;GO:0005524//ATP binding;GO:0032553//ribonucleotide binding;GO:0…	K04733//interleukin-1 receptor-associated kinase 4 [EC:2.7.11.1];K04733//interleukin-1 receptor-associated kinase 4 [EC:2.7.11.1];K04733//interleukin-1 receptor-associated kinase 4 [EC:2.7.11.1]
101261978	2.60966	6.84578e-201	-0.771939	7.58048e-28	Known_gene	51584290	51586604	NC_015439.2	3.77	7.07	4.9	1.33	2.38	5.66	0.49	1.26	1.87	5.03	7.04	10.7	-0.771939	7.58048e-28	2.0821e-27	2.60966	6.84578e-201	1.13369e-200		K04733//interleukin-1 receptor-associated kinase 4 [EC:2.7.11.1]
101261956	2.20894	8.94302e-226	0.842139	3.53697e-31	Known_gene	67278306	67285908	NC_015446.2	3.3	1.84	17.82	17.37	9.46	15.6	4.05	2.96	11.17	24.74	36.37	21.34	0.842139	3.53697e-31	9.32973e-31	2.20894	8.94302e-226	1.33887e-225
101261932	3.97509	1.13072e-11	-0.177363	0.0543983	Known_gene	63596409	63599268	NC_015444.2	0.33	0.61	0.85	0.55	0.11	0.96	0	0	0.04	0.14	0.17	0.28	-0.177363	0.0543983	0.296389	3.97509	1.13072e-11	7.62936e-11	GO:0043412//macromolecule modification;GO:0006793//phosphorus metabolic process;GO:0016310//phosphorylation;GO:0071704//organic substance metabolic process;GO:0006807//nitrogen compound metabolic process;GO:0006464//cellular protein modification process;GO:0009987//cellular process;GO:0043170//macromolecule metabolic process;GO:0006796//phosphate-containing compound metabolic process;GO:0006468//…	K04733//interleukin-1 receptor-associated kinase 4 [EC:2.7.11.1]
101261900	5.8349	0	0.519284	3.77264e-08	Known_gene	69025491	69026379	NC_015440.2	5.54	4.94	3.71	5.61	6.8	8.07	1.84	2.52	1.6	5.23	318.03	8.13	0.519284	3.77264e-08	1.48664e-07	5.8349	0	0
101261870	5.34747	0	0.766761	1.96795e-08	Known_gene	47061025	47063642	NC_015439.2	1.35	0.63	0.75	1.73	1.56	1.36	0.96	1.11	1.18	1.93	122.93	2.6	0.766761	1.96795e-08	7.68343e-08	5.34747	0	0		K04733//interleukin-1 receptor-associated kinase 4 [EC:2.7.11.1];K12173//BRCA1-A complex subunit BRE+ko03440//Homologous recombination
101261854	3.2022	1.88677e-28	0.533005	0.000110461	Known_gene	66080715	66082405	NC_015446.2	1.07	0.92	1	0.74	1.08	2.59	0	0.2	0.15	0.7	0.93	1.76	0.533005	0.000110461	0.000492806	3.2022	1.88677e-28	9.75658e-28		K15502//serine/threonine-protein phosphatase 6 regulatory ankyrin repeat subunit A
101261851	2.88328	0	0.884239	2.17789e-45	Known_gene	43096719	43099964	NC_015438.2	2.67	3.25	3.06	6.08	3.55	7	3.01	3.33	3.35	9.64	49.24	11.19	0.884239	2.17789e-45	4.93633e-45	2.88328	0	0		K09518//DnaJ homolog subfamily B member 12+ko04141//Protein processing in endoplasmic reticulum;K09510//DnaJ homolog subfamily B member 4;K09511//DnaJ homolog subfamily B member 5
101261849	2.64669	1.87579e-47	0.673135	1.05605e-08	Known_gene	5338897	5342727	NC_015438.2	1.11	2.29	1.18	3.12	1	2.53	0.24	0.19	0.72	1.86	1.72	4.02	0.673135	1.05605e-08	4.09175e-08	2.64669	1.87579e-47	7.80042e-47
101261822	2.27909	7.27778e-07			Known_gene	3202302	3205169	NC_015443.2	0.01	0.01	0	0	0	0	0.01	0.01	0.08	0	0.45	0.03				2.27909	7.27778e-07	5.58723e-06
101261794	2.33847	1.37252e-06	0.662213	0.0128099	Known_gene	61985521	61986920	NC_015449.2	0.18	0.3	0.29	0.36	0.42	0.44	0.03	0.15	0.03	0.22	0.64	0.21	0.662213	0.0128099	0.06529	2.33847	1.37252e-06	1.06329e-05		K16292//KDEL-tailed cysteine endopeptidase [EC:3.4.22.-]
101261785	2.38427	7.82735e-07	0.0407248	0.159722	Known_gene	2698243	2701550	NC_015440.2	0.07	0.07	0.08	0.11	0.05	0.08	0.05	0.04	0.04	0.1	0.54	0	0.0407248	0.159722	0.942624	2.38427	7.82735e-07	6.0132e-06		K03327//multidrug resistance protein, MATE family;K03327//multidrug resistance protein, MATE family
101261779	2.41402	2.34802e-10	0.109987	0.116509	Known_gene	52121121	52122856	NC_015448.2	0.84	0.47	0.44	0.37	0.58	0.95	0.09	0.14	0.12	0.8	0.58	0.48	0.109987	0.116509	0.670005	2.41402	2.34802e-10	1.63182e-09
101261732	3.2594	0	0.529535	1.87937e-43	Known_gene	64987992	64988804	NC_015445.2	27.34	31.59	42.99	31.67	44.4	74.2	13.81	14.07	22.15	140.56	136.54	216.43	0.529535	1.87937e-43	4.33826e-43	3.2594	0	0
101261686	2.54527	2.63681e-16	0.51021	0.0175015	Known_gene	54875191	54877530	NC_015439.2	0.06	0.29	0.23	0.36	0.25	0.23	0.06	0.12	0.1	0.37	0.56	0.76	0.51021	0.0175015	0.0902413	2.54527	2.63681e-16	1.6275e-15		K17964//leucine-rich PPR motif-containing protein, mitochondrial
101261612	2.1563	2.03304e-17	0.827321	7.59578e-06	Known_gene	53669244	53670814	NC_015441.2	0.46	0.62	0.64	0.35	0.99	1.78	0.22	0.24	0.23	1.22	0.71	1.18	0.827321	7.59578e-06	3.22877e-05	2.1563	2.03304e-17	1.23095e-16
101261523	4.58395	1.95501e-07	-1.54424	0.00526393	Known_gene	1986498	1987781	NC_015443.2	0.18	0.09	0.38	0.18	0	0.05	0	0.04	0	0.14	0.6	0.37	-1.54424	0.00526393	0.025916	4.58395	1.95501e-07	1.47305e-06		K06995//uncharacterized protein
101261495	4.19163	0.000419996	1.36265	0.0437136	Known_gene	27282199	27286523	NC_015440.2	0	0	0.03	0.01	0.01	0.04	0	0	0	0	0.12	0	1.36265	0.0437136	0.23494	4.19163	0.000419996	0.00363028		K04730//interleukin-1 receptor-associated kinase 1 [EC:2.7.11.1];K04733//interleukin-1 receptor-associated kinase 4 [EC:2.7.11.1]
101261469	2.81054	1.3069e-09	0.692801	0.0158702	Known_gene	85921189	85923863	NC_015438.2	0.1	0.23	0.19	0.2	0.36	0.3	0	0.05	0.14	0.43	0.46	0.39	0.692801	0.0158702	0.081455	2.81054	1.3069e-09	9.2423e-09		K04733//interleukin-1 receptor-associated kinase 4 [EC:2.7.11.1]
101261464	2.21049	2.96525e-12	0.0913509	0.138734	Known_gene	2300608	2311985	NC_015447.2	0.09	0.03	0.18	0.16	0.03	0.14	0.03	0.09	0.09	0.11	0.81	0.05	0.0913509	0.138734	0.81109	2.21049	2.96525e-12	1.97406e-11		K03028//26S proteasome regulatory subunit N1+ko03050//Proteasome
101261414	4.51356	0.000110664			Known_gene	62649462	62650255	NC_015442.2	0	0	0	0	0	0	0	0	0	0.05	0.45	0				4.51356	0.000110664	0.000927321		K14496//abscisic acid receptor PYR/PYL family+ko04016//MAPK signaling pathway - plant+ko04075//Plant hormone signal transduction
101261368	2.31939	2.06392e-18	-0.0771117	0.135714	Known_gene	94577153	94577628	NC_015438.2	1.31	1.22	2.5	1.12	0.92	2.93	0.51	0.9	1.4	2.61	9.43	1.73	-0.0771117	0.135714	0.791421	2.31939	2.06392e-18	1.22934e-17
101261310	2.13684	5.10824e-78	0.946509	5.73443e-19	Known_gene	64688651	64693839	NC_015440.2	0.87	1.03	1.4	2.65	1.66	2.08	0.66	0.53	0.93	1.43	5.44	2.44	0.946509	5.73443e-19	1.80416e-18	2.13684	5.10824e-78	1.62367e-77		K13648//alpha-1,4-galacturonosyltransferase [EC:2.4.1.43]+ko00520//Amino sugar and nucleotide sugar metabolism;K13648//alpha-1,4-galacturonosyltransferase [EC:2.4.1.43]+ko00520//Amino sugar and nucleotide sugar metabolism
101261282	2.46356	0	0.499923	3.99343e-28	Known_gene	49985367	50005249	NC_015439.2	5.4	4.97	3.84	7.62	5.6	6.83	1.68	2.24	1.6	10.47	10.77	9.21	0.499923	3.99343e-28	1.09466e-27	2.46356	0	0		K13024//inositol-hexakisphosphate/diphosphoinositol-pentakisphosphate 1-kinase [EC:2.7.4.24]+ko04070//Phosphatidylinositol signaling system;K13024//inositol-hexakisphosphate/diphosphoinositol-pentakisphosphate 1-kinase [EC:2.7.4.24]+ko04070//Phosphatidylinositol signaling system;K13024//inositol-hexakisphosphate/diphosphoinositol-pentakisphosphate 1-kinase [EC:2.7.4.24]+ko04070//Phosphatidylinosi…
101261232	2.83549	1.39941e-06	1.62569	0.0135723	Known_gene	2136009	2142882	NC_015442.2	0.01	0.01	0	0.01	0.03	0.01	0	0.02	0.01	0.06	0.02	0.08	1.62569	0.0135723	0.06931	2.83549	1.39941e-06	1.08434e-05		K13453//disease resistance protein+ko04626//Plant-pathogen interaction;K13457//disease resistance protein RPM1+ko04626//Plant-pathogen interaction
101261070	2.1619	1.20394e-162	-0.472766	1.01835e-07	Known_gene	89215567	89220515	NC_015438.2	3.28	2.47	3.15	2.21	1.64	2.61	1.83	1.89	1.61	5.28	9.17	10.11	-0.472766	1.01835e-07	4.06554e-07	2.1619	1.20394e-162	2.32783e-162		K13754//solute carrier family 24 (sodium/potassium/calcium exchanger), member 6
101261034	2.49713	0	0.515327	1.26556e-10	Known_gene	33731326	33735131	NC_015443.2	3.2	3.45	3.98	4.2	4.68	6.58	3.39	4.39	4.56	7.69	54.36	7.18	0.515327	1.26556e-10	4.67698e-10	2.49713	0	0
101261019	3.0066	0	0.885106	1.5633e-65	Known_gene	57882232	57883885	NC_015441.2	6.3	10.65	6.68	11.65	9.78	22.65	1.02	2.65	4.38	17.03	23.11	25.2	0.885106	1.5633e-65	2.94409e-65	3.0066	0	0		K08332//;K04733//interleukin-1 receptor-associated kinase 4 [EC:2.7.11.1]
101260980	6.96202	2.12029e-161	0.526152	0.0511365	Known_gene	26993372	26997237	NC_015439.2	0.04	0.05	0.07	0.1	0.04	0.08	0.03	0.01	0.02	2.19	2.27	3.97	0.526152	0.0511365	0.277268	6.96202	2.12029e-161	4.11937e-161	GO:0031224//intrinsic component of membrane;GO:0016021//integral component of membrane;GO:0044425//membrane part;GO:0016020//membrane;GO:0032553//ribonucleotide binding;GO:0016772//transferase activity, transferring phosphorus-containing groups;GO:0004674//protein serine/threonine kinase activity;GO:0016301//kinase activity;GO:0097159//organic cyclic compound binding;GO:0035639//purine ribonucleo…	K13420//LRR receptor-like serine/threonine-protein kinase FLS2 [EC:2.7.11.1]+ko04626//Plant-pathogen interaction+ko04016//MAPK signaling pathway - plant;K13420//LRR receptor-like serine/threonine-protein kinase FLS2 [EC:2.7.11.1]+ko04626//Plant-pathogen interaction+ko04016//MAPK signaling pathway - plant;K13420//LRR receptor-like serine/threonine-protein kinase FLS2 [EC:2.7.11.1]+ko04626//Plant-p…
101260959	2.72768	4.47238e-07			Known_gene	57344303	57348668	NC_015445.2	0	0.01	0.01	0	0	0	0	0.03	0.04	0	0.45	0				2.72768	4.47238e-07	3.4115e-06
101260810	3.89207	3.51163e-05	3.21065	0.00135976	Known_gene	65394214	65395867	NC_015440.2	0.02	0	0	0.08	0.02	0.09	0.02	0	0	0.07	0.05	0.23	3.21065	0.00135976	0.0064156	3.89207	3.51163e-05	0.000287589		K10683//BRCA1-associated RING domain protein 1+ko03440//Homologous recombination;K03798//cell division protease FtsH [EC:3.4.24.-];K19090//CRISPR-associated protein Cas5t
101260786	2.44632	1.22688e-224	0.621348	1.12998e-18	Known_gene	46223235	46226527	NC_015439.2	3.41	3.17	3.36	6.06	3.78	5.51	2	1.47	1.54	4.89	15	7.47	0.621348	1.12998e-18	3.57191e-18	2.44632	1.22688e-224	1.84376e-224		K08832//serine/threonine-protein kinase SRPK3 [EC:2.7.11.1]
101260740	2.87177	9.83554e-12	-0.298398	0.0696993	Known_gene	63623458	63626183	NC_015444.2	0.14	0.23	0.13	0.15	0.11	0.15	0.01	0.07	0.03	0.09	0.53	0.19	-0.298398	0.0696993	0.385046	2.87177	9.83554e-12	6.62673e-11	GO:0036211//protein modification process;GO:0044237//cellular metabolic process;GO:0048544//recognition of pollen;GO:0006468//protein phosphorylation;GO:1901564//organonitrogen compound metabolic process;GO:0071704//organic substance metabolic process;GO:0044267//cellular protein metabolic process;GO:0016310//phosphorylation;GO:0044706//multi-multicellular organism process;GO:0006464//cellular pr…	K04733//interleukin-1 receptor-associated kinase 4 [EC:2.7.11.1]
101260663	2.48569	4.48173e-167	0.73622	3.91236e-24	Known_gene	57443357	57450295	NC_015445.2	3.51	4.69	4.58	8.11	5.37	7.92	1.48	1.68	1.85	4.72	14.01	9.83	0.73622	3.91236e-24	1.1315e-23	2.48569	4.48173e-167	8.52396e-167		K15029//translation initiation factor 3 subunit L
101260658	2.46813	3.97734e-05	1.04072	0.0539427	Known_gene	62870224	62872144	NC_015444.2	0	0.02	0.04	0	0.02	0.11	0.06	0	0.02	0.02	0.36	0.05	1.04072	0.0539427	0.293388	2.46813	3.97734e-05	0.000326347		K09487//heat shock protein 90kDa beta+ko04141//Protein processing in endoplasmic reticulum+ko04626//Plant-pathogen interaction
101260657	2.43076	4.32446e-28	-0.270657	0.00320387	Known_gene	32106785	32108599	NC_015444.2	6.27	7.55	7.51	5.1	5.98	6.82	0.65	0.95	0.66	4.86	3.13	4.41	-0.270657	0.00320387	0.0155129	2.43076	4.32446e-28	2.24762e-27		K01872//alanyl-tRNA synthetase [EC:6.1.1.7]+ko00970//Aminoacyl-tRNA biosynthesis;K07300//Ca2+:H+ antiporter
101260654	2.33706	9.99094e-201	0.74301	2.28484e-66	Known_gene	49195968	49197261	NC_015443.2	13.59	36.72	10.33	28.08	40.43	32.35	0.91	8.55	2.11	22.18	20.81	15.89	0.74301	2.28484e-66	4.2684e-66	2.33706	9.99094e-201	1.65506e-200		K09422//myb proto-oncogene protein, plant
101260643	2.52079	3.50808e-161	0.169305	0.0466694	Known_gene	63668503	63675429	NC_015442.2	0.37	0.82	0.15	0.69	0.24	0.56	0.34	0.47	0.8	1.94	3.23	4.3	0.169305	0.0466694	0.251828	2.52079	3.50808e-161	6.82469e-161		K05681//ATP-binding cassette, subfamily G (WHITE), member 2+ko02010//ABC transporters
101260467	4.19163	0.000419996	1.26312	0.0119742	Known_gene	830925	831881	NC_015446.2	0.04	0.15	0.03	0.22	0.11	0.2	0	0	0	0.08	0.21	0.05	1.26312	0.0119742	0.0608852	4.19163	0.000419996	0.00363028		K04505//presenilin 1 [EC:3.4.23.-]
101260464	2.23949	8.81461e-70	0.787838	6.36035e-13	Known_gene	4975385	4976432	NC_015438.2	3.33	3.61	2.64	5.85	5.5	5.2	0.84	1.39	2.7	6.2	10.91	5.86	0.787838	6.36035e-13	2.23701e-12	2.23949	8.81461e-70	2.99202e-69
101260458	4.13836	0.000511045	-0.708832	0.0136842	Known_gene	53179977	53197682	NC_015445.2	0.3	0.19	0.07	0.05	0.08	0.22	0	0	0	0	0.05	0.11	-0.708832	0.0136842	0.0699001	4.13836	0.000511045	0.00443739		K17604//zinc finger SWIM domain-containing protein 3
101260411	2.11472	3.49513e-169	0.697981	1.0824e-25	Known_gene	54390084	54396382	NC_015440.2	5.82	6.98	5.76	11.32	9.54	9.26	2.37	3.36	3.85	5.69	26.46	9.08	0.697981	1.0824e-25	3.06078e-25	2.11472	3.49513e-169	6.59865e-169		K14006//protein transport protein SEC23+ko04141//Protein processing in endoplasmic reticulum
101260393	2.53677	1.21137e-30	0.785314	1.8936e-08	Known_gene	234535	235515	NC_015448.2	1.25	1.99	2.08	2.21	1.84	5.32	0.32	0.53	0.49	2.31	4.13	1.19	0.785314	1.8936e-08	7.38844e-08	2.53677	1.21137e-30	6.08033e-30		K19040//E3 ubiquitin-protein ligase ATL10/75/76/77/78 [EC:2.3.2.27]
101260356	2.51929	3.91379e-189	0.680179	1.68397e-14	Known_gene	2771191	2774364	NC_015444.2	1.28	2.56	1.56	2.96	2.27	4.22	0.92	1.12	1.53	5.45	7.32	9.24	0.680179	1.68397e-14	5.7301e-14	2.51929	3.91379e-189	6.80557e-189	GO:0071822//protein complex subunit organization;GO:0016043//cellular component organization;GO:0065003//macromolecular complex assembly;GO:0009987//cellular process;GO:0034622//cellular macromolecular complex assembly;GO:0006461//protein complex assembly;GO:0070271//protein complex biogenesis;GO:0044085//cellular component biogenesis;GO:0022607//cellular component assembly;GO:0043623//cellular p…	K20043//clathrin coat assembly protein AP180;K20043//clathrin coat assembly protein AP180;K20043//clathrin coat assembly protein AP180
101260348	5.19163	1.97853e-10	0.625687	0.110173	Known_gene	25990422	25993749	NC_015443.2	0.01	0	0.01	0.01	0.01	0.01	0	0	0.01	0.1	0.19	0.22	0.625687	0.110173	0.631238	5.19163	1.97853e-10	1.37217e-09	GO:0050789//regulation of biological process;GO:0019725//cellular homeostasis;GO:0034765//regulation of ion transmembrane transport;GO:1903959//regulation of anion transmembrane transport;GO:0006873//cellular ion homeostasis;GO:0044070//regulation of anion transport;GO:0048878//chemical homeostasis;GO:0043269//regulation of ion transport;GO:0065008//regulation of biological quality;GO:0051049//re…	K20716//mitogen-activated protein kinase kinase kinase 17/18+ko04016//MAPK signaling pathway - plant
101260345	2.51356	4.7151e-06	-3.76663	0.0024069	Known_gene	63675701	63683146	NC_015442.2	0.01	0.04	0	0	0	0	0	0	0.04	0.02	0.06	0.15	-3.76663	0.0024069	0.011562	2.51356	4.7151e-06	3.72553e-05		K05681//ATP-binding cassette, subfamily G (WHITE), member 2+ko02010//ABC transporters
101260264	2.68517	1.53456e-19	0.228352	0.0871173	Known_gene	78165043	78168930	NC_015438.2	0.17	0.19	0.24	0.17	0.26	0.29	0.1	0.13	0.09	0.75	0.76	0.58	0.228352	0.0871173	0.487834	2.68517	1.53456e-19	8.99186e-19		K20027//palmitoyltransferase ZDHHC1/11 [EC:2.3.1.225]
101260173	3.19163	0.000954873	-0.307199	0.104461	Known_gene	74424844	74425672	NC_015438.2	0.2	0.35	0.14	0.1	0.35	0.11	0.05	0	0	0.21	0.06	0.21	-0.307199	0.104461	0.595811	3.19163	0.000954873	0.00844485		K08726//soluble epoxide hydrolase / lipid-phosphate phosphatase [EC:3.3.2.10 3.1.3.76]+ko04146//Peroxisome+ko00590//Arachidonic acid metabolism+ko01100//Metabolic pathways;K08099//chlorophyllase [EC:3.1.1.14]+ko00860//Porphyrin and chlorophyll metabolism+ko01100//Metabolic pathways+ko01110//Biosynthesis of secondary metabolites;K14759//isochorismate synthase / 2-succinyl-5-enolpyruvyl-6-hydroxy-3…
101260171	2.61188	0	-0.224833	6.24366e-08	Known_gene	74324209	74325631	NC_015438.2	14.29	24.03	19.07	5.47	16.45	28.06	2.14	4.2	9.17	24.48	25.37	47.85	-0.224833	6.24366e-08	2.4789e-07	2.61188	0	0		K19041//E3 ubiquitin-protein ligase RNF38/44 [EC:2.3.2.27];K19038//E3 ubiquitin-protein ligase ATL41 [EC:2.3.2.27]
101260148	5.09852	4.40197e-06	1.04072	0.096168	Known_gene	41443259	41444360	NC_015443.2	0	0	0.04	0.04	0	0.04	0	0	0	0	0.69	0	1.04072	0.096168	0.544095	5.09852	4.40197e-06	3.47333e-05
101260140	5.40108	9.37329e-12	1.84808	0.0155425	Known_gene	61630524	61632619	NC_015442.2	0.03	0	0	0.06	0.02	0.03	0	0	0.02	0.15	0.34	0.2	1.84808	0.0155425	0.0797386	5.40108	9.37329e-12	6.31335e-11		K18823//soyasaponin III rhamnosyltransferase [EC:2.4.1.273]
101260058	2.21684	1.84862e-83	0.783949	9.41536e-12	Known_gene	43358841	43364287	NC_015443.2	0.84	0.86	0.85	2.11	0.8	1.48	0.66	0.53	0.6	1.97	3.35	3.13	0.783949	9.41536e-12	3.3902e-11	2.21684	1.84862e-83	5.64813e-83
101260046	2.54078	1.54991e-18	0.27205	0.0461481	Known_gene	3811760	3813178	NC_015442.2	0.48	0.64	0.53	0.24	0.56	1.23	0.2	0.14	0.18	0.28	1.06	1.91	0.27205	0.0461481	0.248926	2.54078	1.54991e-18	9.21496e-18		K14493//gibberellin receptor GID1 [EC:3.-.-.-]+ko04075//Plant hormone signal transduction;K20506//tuliposide A-converting enzyme [EC:4.2.99.22]
101260028	4.36155	6.6327e-11			Known_gene	58823348	58824778	NC_015440.2	0	0	0	0	0.02	0.05	0	0	0.05	0.56	0.27	0.13				4.36155	6.6327e-11	4.54812e-10		K19589//release factor glutamine methyltransferase [EC:2.1.1.297];K11000//callose synthase [EC:2.4.1.-]
101259996	2.0719	0	0.127754	0.000682897	Known_gene	65157933	65159649	NC_015447.2	16.13	22.45	14.66	6.76	18.91	33.4	3.59	5.95	14.93	33.13	33.38	35.92	0.127754	0.000682897	0.00316627	2.0719	0	0		K07213//copper chaperone
101259987	2.80634	1.29575e-10	0.21065	0.116598	Known_gene	85690481	85693469	NC_015438.2	0.05	0.05	0.15	0.09	0.08	0.12	0	0.03	0.1	0.3	0.39	0.2	0.21065	0.116598	0.670585	2.80634	1.29575e-10	8.95285e-10		K20495//long-chain fatty acid omega-monooxygenase [EC:1.14.13.205]
101259940	5.33241	8.4696e-07			Known_gene	1082849	1083513	NC_015443.2	0	0	0	0	0	0	0	0	0	0.42	0.31	0.67				5.33241	8.4696e-07	6.51361e-06		K13420//LRR receptor-like serine/threonine-protein kinase FLS2 [EC:2.7.11.1]+ko04626//Plant-pathogen interaction+ko04016//MAPK signaling pathway - plant;K04730//interleukin-1 receptor-associated kinase 1 [EC:2.7.11.1]
101259892	4.19163	4.92993e-06	1.04072	0.0539427	Known_gene	54525575	54534395	NC_015447.2	0	0.04	0	0	0.03	0.05	0.01	0	0	0.03	0.17	0.03	1.04072	0.0539427	0.293388	4.19163	4.92993e-06	3.89859e-05		K03064//26S proteasome regulatory subunit T4+ko03050//Proteasome
101259859	3.87969	2.72855e-104	0.205784	0.0720654	Known_gene	63648763	63650481	NC_015444.2	0.15	0.7	0.52	0.6	0.32	0.67	0.04	0.08	0.67	1.51	3.52	7.13	0.205784	0.0720654	0.399109	3.87969	2.72855e-104	7.28003e-104		K09419//heat shock transcription factor, other eukaryote
101259846	4.48537	0	0.155575	0.0023452	Known_gene	25806627	25815375	NC_015443.2	7.48	6.93	6.21	6.59	7.38	7.21	7.25	7.77	8.52	5.72	147.08	6.23	0.155575	0.0023452	0.0112444	4.48537	0	0	GO:0042221//response to chemical;GO:0080090//regulation of primary metabolic process;GO:0009987//cellular process;GO:0009059//macromolecule biosynthetic process;GO:0006355//regulation of transcription, DNA-templated;GO:0019222//regulation of metabolic process;GO:0006950//response to stress;GO:0008152//metabolic process;GO:0044238//primary metabolic process;GO:0009751//response to salicylic acid;G…	K12133//MYB-related transcription factor LHY+ko04712//Circadian rhythm - plant;K12133//MYB-related transcription factor LHY+ko04712//Circadian rhythm - plant;K12133//MYB-related transcription factor LHY+ko04712//Circadian rhythm - plant;K12133//MYB-related transcription factor LHY+ko04712//Circadian rhythm - plant;K12133//MYB-related transcription factor LHY+ko04712//Circadian rhythm - plant;K121…
101259829	4.13836	7.20283e-06	-1.62765	0.0480398	Known_gene	62537355	62539728	NC_015440.2	0.07	0	0	0	0	0.02	0	0.02	0	0.04	0.27	0.03	-1.62765	0.0480398	0.259592	4.13836	7.20283e-06	5.7262e-05		K11816//indole-3-pyruvate monooxygenase [EC:1.14.13.168]+ko00380//Tryptophan metabolism+ko01100//Metabolic pathways;K11723//bromodomain-containing protein 7/9;K20000//maturase K;K11290//template-activating factor I;K04733//interleukin-1 receptor-associated kinase 4 [EC:2.7.11.1]
101259815	3.19163	0.000954873	1.21065	0.0277947	Known_gene	4509924	4511957	NC_015449.2	0	0.05	0.02	0.03	0.03	0.09	0.02	0	0	0.07	0	0.09	1.21065	0.0277947	0.146075	3.19163	0.000954873	0.00844485		K10406//kinesin family member C2/C3;K13420//LRR receptor-like serine/threonine-protein kinase FLS2 [EC:2.7.11.1]+ko04626//Plant-pathogen interaction+ko04016//MAPK signaling pathway - plant
101259700	3.60667	4.22885e-09	0.925248	3.16502e-05	Known_gene	3254831	3257554	NC_015448.2	0.16	0.34	0.14	0.26	0.36	0.6	0	0.04	0	0.1	0.28	0.07	0.925248	3.16502e-05	0.000137818	3.60667	4.22885e-09	3.03506e-08		K13457//disease resistance protein RPM1+ko04626//Plant-pathogen interaction
101259676	3.06664	0	-0.108815	0.0209855	Known_gene	4042209	4043856	NC_015447.2	9.97	7.77	9.26	6.66	8.06	12.55	1.49	1.62	3.56	13.29	15.69	28.54	-0.108815	0.0209855	0.109066	3.06664	0	0	GO:0071704//organic substance metabolic process;GO:0006629//lipid metabolic process;GO:0044238//primary metabolic process;GO:0008152//metabolic process;GO:0031224//intrinsic component of membrane;GO:0016021//integral component of membrane;GO:0044425//membrane part;GO:0016020//membrane;GO:0003824//catalytic activity;GO:0016491//oxidoreductase activity;	K13076//Delta8-fatty-acid desaturase [EC:1.14.19.4];K21734//sphingolipid 8-(E/Z)-desaturase [EC:1.14.19.29];K21734//sphingolipid 8-(E/Z)-desaturase [EC:1.14.19.29]
101259612	5.99898	1.74911e-09	1.04072	0.096168	Known_gene	2424391	2426109	NC_015440.2	0	0.03	0	0.03	0	0.03	0	0	0	0	0.88	0.08	1.04072	0.096168	0.544095	5.99898	1.74911e-09	1.24275e-08		K04733//interleukin-1 receptor-associated kinase 4 [EC:2.7.11.1]
101259605	3.34328	0	0.747141	1.77041e-37	Known_gene	53169968	53176016	NC_015448.2	6.69	6.88	5.34	11.72	7.58	12.56	5.68	5.57	6.62	14.8	141.72	20.52	0.747141	1.77041e-37	4.36131e-37	3.34328	0	0	GO:0005975//carbohydrate metabolic process;GO:0071704//organic substance metabolic process;GO:0044238//primary metabolic process;GO:0008152//metabolic process;GO:0016021//integral component of membrane;GO:0016020//membrane;GO:0044425//membrane part;GO:0031224//intrinsic component of membrane;GO:0016787//hydrolase activity;GO:0004553//hydrolase activity, hydrolyzing O-glycosyl compounds;GO:0016798…	K19891//glucan endo-1,3-beta-glucosidase 1/2/3 [EC:3.2.1.39]+ko00500//Starch and sucrose metabolism
101259591	5.58395	1.08914e-07	4.04072	0.00108591	Known_gene	54534956	54537849	NC_015447.2	0	0	0	0.02	0.01	0.06	0	0	0	0.02	0.23	0.02	4.04072	0.00108591	0.00509514	5.58395	1.08914e-07	8.13703e-07		K04733//interleukin-1 receptor-associated kinase 4 [EC:2.7.11.1]
101259581	2.04454	3.10669e-178	0.0885255	0.0548147	Known_gene	89167554	89169420	NC_015438.2	3.31	3.56	3.28	1.88	3.25	5.83	2.28	2.16	3.47	8.02	10.44	15.11	0.0885255	0.0548147	0.298779	2.04454	3.10669e-178	5.64337e-178		K10664//E3 ubiquitin-protein ligase ATL6/9/15/31/42/55 [EC:2.3.2.27]
101259567	3.59762	1.63456e-13	0.751218	0.0316063	Known_gene	61220396	61223034	NC_015445.2	0.06	0.08	0	0.1	0.05	0.08	0	0.03	0.04	0.13	0.56	0.07	0.751218	0.0316063	0.16721	3.59762	1.63456e-13	1.06194e-12		K01074//palmitoyl-protein thioesterase [EC:3.1.2.22]+ko01100//Metabolic pathways+ko00062//Fatty acid elongation+ko01212//Fatty acid metabolism;K19589//release factor glutamine methyltransferase [EC:2.1.1.297];K19090//CRISPR-associated protein Cas5t;K17710//pentatricopeptide repeat domain-containing protein 1
101259548	2.91625	0	0.661335	3.55952e-44	Known_gene	44234053	44235930	NC_015443.2	5.73	12.35	8.45	8.77	11.15	22.55	0.97	1.96	6.24	19.29	21.51	28.81	0.661335	3.55952e-44	8.1599e-44	2.91625	0	0	GO:0043412//macromolecule modification;GO:0044260//cellular macromolecule metabolic process;GO:0044237//cellular metabolic process;GO:0008152//metabolic process;GO:0071704//organic substance metabolic process;GO:0016310//phosphorylation;GO:0006468//protein phosphorylation;GO:0019538//protein metabolic process;GO:0044267//cellular protein metabolic process;GO:0006464//cellular protein modification…	K04733//interleukin-1 receptor-associated kinase 4 [EC:2.7.11.1]
101259535	3.515	0.000252637	-0.74515	0.078079	Known_gene	60360219	60362102	NC_015441.2	0.02	0.1	0	0	0.04	0.03	0	0	0.02	0.1	0.11	0	-0.74515	0.078079	0.434953	3.515	0.000252637	0.00215662		K13030//cyanohydrin beta-glucosyltransferase [EC:2.4.1.85]+ko01110//Biosynthesis of secondary metabolites+ko00460//Cyanoamino acid metabolism;K00699//glucuronosyltransferase [EC:2.4.1.17]+ko00860//Porphyrin and chlorophyll metabolism+ko00040//Pentose and glucuronate interconversions+ko01100//Metabolic pathways+ko00053//Ascorbate and aldarate metabolism+ko01110//Biosynthesis of secondary metabolit…
101259520	2.47135	2.85732e-17	-0.0603444	0.134383	Known_gene	66683870	66687366	NC_015449.2	0.61	0.49	0.12	0.36	0.38	0.41	0.07	0.12	0.09	0.43	0.46	0.79	-0.0603444	0.134383	0.783439	2.47135	2.85732e-17	1.73447e-16		K00801//farnesyl-diphosphate farnesyltransferase [EC:2.5.1.21]+ko00909//Sesquiterpenoid and triterpenoid biosynthesis+ko01100//Metabolic pathways+ko01110//Biosynthesis of secondary metabolites+ko00100//Steroid biosynthesis;K07874//Ras-related protein Rab-1A
101259500	2.44539	2.3899e-11	0.332906	0.0428073	Known_gene	47140950	47142528	NC_015439.2	0.47	0.25	0.47	0.42	0.3	0.81	0.12	0.12	0.08	0.37	1.16	0.2	0.332906	0.0428073	0.22954	2.44539	2.3899e-11	1.62418e-10
101259487	2.19163	2.40438e-05	-2.07475	0.00230442	Known_gene	96759810	96760987	NC_015438.2	0.03	0.28	0.13	0.03	0.04	0.04	0.11	0.07	0.04	0.22	0.47	0.29	-2.07475	0.00230442	0.0110425	2.19163	2.40438e-05	0.000195179
101259450	4.51356	0.000110664	4.04072	0.00108591	Known_gene	49233829	49251752	NC_015443.2	0	0	0	0.01	0.02	0.03	0	0	0	0.08	0.01	0	4.04072	0.00108591	0.00509514	4.51356	0.000110664	0.000927321		K10357//myosin V;K10357//myosin V;K10357//myosin V;K10357//myosin V
101259449	4.65106	5.73687e-05	0.718797	0.0680632	Known_gene	43401227	43402509	NC_015443.2	0.05	0.05	0.03	0	0.05	0.17	0	0	0	0.03	0.09	0.26	0.718797	0.0680632	0.375596	4.65106	5.73687e-05	0.000474283
101259406	2.24226	4.165e-06	0.419236	0.0871135	Known_gene	2213413	2215688	NC_015440.2	0.03	0.05	0.07	0.06	0.04	0.09	0.04	0.03	0.03	0.24	0.2	0.04	0.419236	0.0871135	0.487765	2.24226	4.165e-06	3.28333e-05		K05681//ATP-binding cassette, subfamily G (WHITE), member 2+ko02010//ABC transporters
101259381	2.07427	2.69002e-23	0.555298	0.00527294	Known_gene	95385392	95390424	NC_015438.2	0.24	0.38	0.08	0.49	0.33	0.18	0.18	0.21	0.22	0.79	0.87	0.92	0.555298	0.00527294	0.0259618	2.07427	2.69002e-23	1.4931e-22		K04733//interleukin-1 receptor-associated kinase 4 [EC:2.7.11.1]
101259376	2.13456	0	0.753627	9.65935e-48	Known_gene	91822834	91826768	NC_015438.2	4.74	4.19	3.27	6.89	5.27	8.47	2.05	3	3.64	8.63	19.45	9.74	0.753627	9.65935e-48	2.145e-47	2.13456	0	0		K17964//leucine-rich PPR motif-containing protein, mitochondrial;K17710//pentatricopeptide repeat domain-containing protein 1
101259323	3.09852	4.5395e-05	0.814449	0.00230311	Known_gene	69090867	69092082	NC_015440.2	0.28	0.2	0.38	0.42	0.66	0.45	0.06	0	0	0.33	0.03	0.12	0.814449	0.00230311	0.011035	3.09852	4.5395e-05	0.000373483		K09286//EREBP-like factor
101259315	5.14837	0	0.432303	0.0058127	Known_gene	2404034	2409732	NC_015440.2	0.28	0.33	0.27	0.45	0.19	0.53	0.38	0.22	0.15	0.82	25.85	0.5	0.432303	0.0058127	0.0287488	5.14837	0	0
101259243	3.19163	0.000954873	1.17823	0.0222228	Known_gene	59377046	59380042	NC_015441.2	0	0.06	0.01	0.04	0.06	0.06	0	0	0.02	0	0.11	0.02	1.17823	0.0222228	0.115783	3.19163	0.000954873	0.00844485		K06911//uncharacterized protein;K05350//beta-glucosidase [EC:3.2.1.21]+ko01100//Metabolic pathways+ko00500//Starch and sucrose metabolism+ko01110//Biosynthesis of secondary metabolites+ko00460//Cyanoamino acid metabolism+ko00940//Phenylpropanoid biosynthesis
101259192	2.41402	2.36325e-14	0.158082	0.096168	Known_gene	77249461	77251862	NC_015438.2	0.64	0.26	0.27	0.32	0.42	0.49	0.04	0.08	0.23	0.66	0.54	0.61	0.158082	0.096168	0.543588	2.41402	2.36325e-14	1.51138e-13	GO:0016740//transferase activity;GO:0003824//catalytic activity;GO:0016747//transferase activity, transferring acyl groups other than amino-acyl groups;GO:0016746//transferase activity, transferring acyl groups;	K19861//benzyl alcohol O-benzoyltransferase [EC:2.3.1.196 2.3.1.232];K20240//spermidine dicoumaroyl transferase [EC:2.3.1.249]
101259170	2.19163	2.45019e-55	0.697113	6.37499e-10	Known_gene	60362023	60365374	NC_015444.2	1.09	1.22	1.27	1.32	1.37	3.21	0.29	0.45	0.88	1.85	2.24	3.48	0.697113	6.37499e-10	2.4001e-09	2.19163	2.45019e-55	9.41786e-55		K01892//histidyl-tRNA synthetase [EC:6.1.1.21]+ko00970//Aminoacyl-tRNA biosynthesis;K18834//WRKY transcription factor 1+ko04626//Plant-pathogen interaction;K13424//WRKY transcription factor 33+ko04626//Plant-pathogen interaction+ko04016//MAPK signaling pathway - plant
101259161	3.00832	3.26975e-30	0.0407248	0.126219	Known_gene	45741584	45743224	NC_015443.2	3.41	1.29	1.39	1.74	2.64	1.88	0.21	0.12	0.13	1.15	1.21	1.47	0.0407248	0.126219	0.731712	3.00832	3.26975e-30	1.65086e-29		K02882//large subunit ribosomal protein L18Ae+ko03010//Ribosome;K01381//saccharopepsin [EC:3.4.23.25];K00924//
101259157	3.34363	3.21614e-18	0.973611	0.000279855	Known_gene	64533782	64539256	NC_015442.2	0.35	0.17	0.16	0.78	0.33	0.2	0.06	0.06	0.07	0.57	0.49	0.95	0.973611	0.000279855	0.00127116	3.34363	3.21614e-18	1.92105e-17		K04733//interleukin-1 receptor-associated kinase 4 [EC:2.7.11.1];K13091//RNA-binding protein 39;K08734//DNA mismatch repair protein MLH1+ko03430//Mismatch repair;K13457//disease resistance protein RPM1+ko04626//Plant-pathogen interaction
101259147	4.89207	1.57118e-05	2.50016	0.00167513	Known_gene	48258903	48260570	NC_015441.2	0	0.04	0	0.08	0.11	0.05	0	0	0	0.14	0.1	0.09	2.50016	0.00167513	0.0079538	4.89207	1.57118e-05	0.000126721		K08332//
101259145	2.46813	1.39045e-06	-0.526316	0.0265353	Known_gene	4918246	4921223	NC_015441.2	0.13	0.17	0.17	0.04	0.21	0.08	0.06	0	0.01	0.2	0.15	0.03	-0.526316	0.0265353	0.139171	2.46813	1.39045e-06	1.07732e-05		K04733//interleukin-1 receptor-associated kinase 4 [EC:2.7.11.1];K13420//LRR receptor-like serine/threonine-protein kinase FLS2 [EC:2.7.11.1]+ko04626//Plant-pathogen interaction+ko04016//MAPK signaling pathway - plant
101259143	2.20057	0	0.885142	8.86108e-32	Known_gene	873711	875916	NC_015441.2	2.67	3.69	2.71	4.98	3.64	8.28	4.46	3.98	3.41	15.72	17.42	22.72	0.885142	8.86108e-32	2.32322e-31	2.20057	0	0		K13434//pathogenesis-related genes transcriptional activator PTI6+ko04626//Plant-pathogen interaction;K09286//EREBP-like factor
101259059	3.89207	3.51163e-05	1.84808	0.00274137	Known_gene	58624148	58626531	NC_015444.2	0.04	0	0.04	0.15	0.1	0.02	0.02	0	0	0.19	0.09	0	1.84808	0.00274137	0.0132124	3.89207	3.51163e-05	0.000287589		K03189//urease accessory protein;K02541//DNA replication licensing factor MCM3 [EC:3.6.4.12]+ko03030//DNA replication
101259043	2.01475	4.19481e-18	0.490528	0.0185483	Known_gene	2696463	2698362	NC_015442.2	0.16	0.4	0.17	0.41	0.32	0.28	0.27	0.21	0.23	0.76	0.78	1.46	0.490528	0.0185483	0.0960471	2.01475	4.19481e-18	2.51074e-17		K17964//leucine-rich PPR motif-containing protein, mitochondrial
101258930	3.56258	0	0.755728	3.73086e-34	Known_gene	66689525	66694086	NC_015449.2	4.31	4.43	3.37	7.47	4.42	8.63	2.42	2.67	2.61	21.69	45.15	23.77	0.755728	3.73086e-34	9.51495e-34	3.56258	0	0		K01102//pyruvate dehydrogenase phosphatase [EC:3.1.3.43]
101258926	2.49725	1.25881e-39	0.849432	1.25936e-22	Known_gene	54289827	54291066	NC_015440.2	7.23	2.86	3.16	1.98	9.31	12.97	0.17	1.05	0.47	3.97	2.24	3.53	0.849432	1.25936e-22	3.72602e-22	2.49725	1.25881e-39	5.68438e-39	GO:0044036//cell wall macromolecule metabolic process;GO:0045229//external encapsulating structure organization;GO:0043170//macromolecule metabolic process;GO:0016043//cellular component organization;GO:0044262//cellular carbohydrate metabolic process;GO:0044237//cellular metabolic process;GO:0010383//cell wall polysaccharide metabolic process;GO:0042546//cell wall biogenesis;GO:0071840//cellular…	K08235//xyloglucan:xyloglucosyl transferase [EC:2.4.1.207]
101258867	5.08975	3.02833e-165	0.544767	0.00619399	Known_gene	38423338	38425715	NC_015443.2	0.33	0.56	0.12	0.51	0.3	0.61	0.17	0.17	0.08	6.08	3.23	3.99	0.544767	0.00619399	0.0306943	5.08975	3.02833e-165	5.80046e-165	GO:0031224//intrinsic component of membrane;GO:0016021//integral component of membrane;GO:0016020//membrane;GO:0044425//membrane part;	K19755//radial spoke head protein 1;K00889//1-phosphatidylinositol-4-phosphate 5-kinase [EC:2.7.1.68]+ko04144//Endocytosis+ko01100//Metabolic pathways+ko04070//Phosphatidylinositol signaling system+ko00562//Inositol phosphate metabolism;K19755//radial spoke head protein 1;K19530//junctophilin
101258803	3.99898	0.000827378			Known_gene	31314854	31320765	NC_015439.2	0	0	0	0	0	0	0	0	0	0.02	0.08	0.05				3.99898	0.000827378	0.00727831
101258777	2.07746	1.83846e-12	-0.458846	0.0121499	Known_gene	5172088	5174953	NC_015446.2	0.35	0.57	0.5	0.43	0.23	0.35	0.07	0.19	0.15	0.23	0.53	1.02	-0.458846	0.0121499	0.0618022	2.07746	1.83846e-12	1.21764e-11		K01592//tyrosine decarboxylase [EC:4.1.1.25]+ko00350//Tyrosine metabolism+ko01100//Metabolic pathways+ko00950//Isoquinoline alkaloid biosynthesis+ko01110//Biosynthesis of secondary metabolites;K01592//tyrosine decarboxylase [EC:4.1.1.25]+ko00350//Tyrosine metabolism+ko01100//Metabolic pathways+ko00950//Isoquinoline alkaloid biosynthesis+ko01110//Biosynthesis of secondary metabolites
101258758	3.24275	5.03122e-12	-0.847057	0.0433299	Known_gene	1036817	1040306	NC_015443.2	0	0.01	0.13	0.04	0.01	0.03	0	0.03	0.06	0.27	0.16	0.35	-0.847057	0.0433299	0.232473	3.24275	5.03122e-12	3.36819e-11		K13420//LRR receptor-like serine/threonine-protein kinase FLS2 [EC:2.7.11.1]+ko04626//Plant-pathogen interaction+ko04016//MAPK signaling pathway - plant
101258753	2.51356	4.7151e-06	0.674597	0.00930455	Known_gene	59520315	59522739	NC_015442.2	0.19	0.2	0.23	0.54	0.26	0.18	0.04	0.06	0	0.18	0.29	0.15	0.674597	0.00930455	0.0468812	2.51356	4.7151e-06	3.72553e-05		K09422//myb proto-oncogene protein, plant
101258738	3.19163	6.61392e-07	0.37776	0.070867	Known_gene	69105761	69107475	NC_015440.2	0.36	0.32	0.08	0.48	0.12	0.38	0	0.04	0.08	0.3	0.49	0.33	0.37776	0.070867	0.392199	3.19163	6.61392e-07	5.0721e-06
101258719	2.15065	4.76342e-177	0.841859	9.99933e-35	Known_gene	7100781	7105803	NC_015448.2	2.02	2.03	2.13	3.59	2.56	4.74	1.37	1.05	1.09	4.58	5.62	5.07	0.841859	9.99933e-35	2.53614e-34	2.15065	4.76342e-177	8.70217e-177		K19613//leucine-rich repeat protein SHOC2;K03283//heat shock 70kDa protein 1/8+ko03040//Spliceosome+ko04144//Endocytosis+ko04141//Protein processing in endoplasmic reticulum;K19613//leucine-rich repeat protein SHOC2;K03283//heat shock 70kDa protein 1/8+ko03040//Spliceosome+ko04144//Endocytosis+ko04141//Protein processing in endoplasmic reticulum
101258702	4.9045	0	0.976404	4.55563e-14	Known_gene	95245841	95247612	NC_015438.2	0.7	2	0.75	2.56	1.8	2.39	0.18	0.32	1.17	12.28	26.1	10.07	0.976404	4.55563e-14	1.56544e-13	4.9045	0	0		K13496//UDP-glucosyl transferase 73C [EC:2.4.1.-]+ko01110//Biosynthesis of secondary metabolites
101258632	2.21878	7.071e-59	0.338599	2.84143e-06	Known_gene	54267447	54291066	NC_015440.2	10.52	4.52	4.74	2.76	10.2	12.8	0.61	1.42	1.26	6.4	4.31	5.2	0.338599	2.84143e-06	1.1875e-05	2.21878	7.071e-59	2.62749e-58	GO:0010383//cell wall polysaccharide metabolic process;GO:0010411//xyloglucan metabolic process;GO:0006073//cellular glucan metabolic process;GO:0010410//hemicellulose metabolic process;GO:0044042//glucan metabolic process;GO:0044085//cellular component biogenesis;GO:0044260//cellular macromolecule metabolic process;GO:0042546//cell wall biogenesis;GO:0005976//polysaccharide metabolic process;GO:…	K08235//xyloglucan:xyloglucosyl transferase [EC:2.4.1.207];K14504//xyloglucan:xyloglucosyl transferase TCH4 [EC:2.4.1.207]+ko04075//Plant hormone signal transduction;K14504//xyloglucan:xyloglucosyl transferase TCH4 [EC:2.4.1.207]+ko04075//Plant hormone signal transduction;K14504//xyloglucan:xyloglucosyl transferase TCH4 [EC:2.4.1.207]+ko04075//Plant hormone signal transduction
101258575	4.36155	0.000214959	1.7161	0.0362621	Known_gene	1664026	1665336	NC_015445.2	0.08	0	0	0	0	0.29	0	0	0	0	0.5	0.18	1.7161	0.0362621	0.193017	4.36155	0.000214959	0.00182716
101258513	2.07092	6.24635e-56	0.814423	5.53144e-24	Known_gene	2039074	2044146	NC_015448.2	6.21	5.7	5.61	7.83	8.11	7.14	1.4	1.5	1.75	4.47	4.76	4.62	0.814423	5.53144e-24	1.60326e-23	2.07092	6.24635e-56	2.38929e-55	GO:0034641//cellular nitrogen compound metabolic process;GO:0006351//transcription, DNA-templated;GO:0044237//cellular metabolic process;GO:0097659//nucleic acid-templated transcription;GO:0090304//nucleic acid metabolic process;GO:0044249//cellular biosynthetic process;GO:0044238//primary metabolic process;GO:0018130//heterocycle biosynthetic process;GO:0034645//cellular macromolecule biosynthet…
101258512	3.65106	5.17078e-07	1.14764	0.0029024	Known_gene	49165356	49166055	NC_015439.2	0.23	0.35	0.16	0.29	0.87	0.49	0	0.06	0.06	0.55	0.26	0.73	1.14764	0.0029024	0.0140085	3.65106	5.17078e-07	3.95119e-06
101258496	3.141	3.59072e-44	-0.26413	0.10106	Known_gene	91781348	91794454	NC_015438.2	0.08	0.08	0.05	0.06	0.02	0.1	0.11	0.09	0.1	0.15	2.17	0.22	-0.26413	0.10106	0.573604	3.141	3.59072e-44	1.53985e-43	GO:0017111//nucleoside-triphosphatase activity;GO:0016817//hydrolase activity, acting on acid anhydrides;GO:0017076//purine nucleotide binding;GO:0000166//nucleotide binding;GO:1901363//heterocyclic compound binding;GO:0016787//hydrolase activity;GO:0032553//ribonucleotide binding;GO:0032550//purine ribonucleoside binding;GO:0003924//GTPase activity;GO:0097159//organic cyclic compound binding;GO:…	K01528//dynamin GTPase [EC:3.6.5.5]+ko04144//Endocytosis;K01528//dynamin GTPase [EC:3.6.5.5]+ko04144//Endocytosis
101258393	3.56086	7.98461e-09	-1.13985	0.00167086	Known_gene	52770903	52775190	NC_015445.2	0.1	0.37	0.21	0.12	0.04	0.15	0	0	0.06	0.13	0.18	0.47	-1.13985	0.00167086	0.00792985	3.56086	7.98461e-09	5.76903e-08		K00480//salicylate hydroxylase [EC:1.14.13.1]+ko01100//Metabolic pathways;K09838//zeaxanthin epoxidase [EC:1.14.15.21]+ko00906//Carotenoid biosynthesis+ko01100//Metabolic pathways+ko01110//Biosynthesis of secondary metabolites
101258359	5.99898	1.74911e-09	0.0407248	0.164879	Known_gene	2006028	2007209	NC_015441.2	0	0	0.03	0	0.03	0	0	0	0	0.03	0.89	0	0.0407248	0.164879	0.984074	5.99898	1.74911e-09	1.24275e-08		K20043//clathrin coat assembly protein AP180;K20044//phosphatidylinositol-binding clathrin assembly protein
101258345	2.254	9.33907e-46	-0.177615	0.0212479	Known_gene	54267447	54268685	NC_015440.2	5.9	2.53	3.38	1.49	4.32	4.77	0.24	1.75	0.66	4.86	3.77	4.18	-0.177615	0.0212479	0.110459	2.254	9.33907e-46	3.94455e-45	GO:0044036//cell wall macromolecule metabolic process;GO:0044238//primary metabolic process;GO:0010410//hemicellulose metabolic process;GO:0044262//cellular carbohydrate metabolic process;GO:0006073//cellular glucan metabolic process;GO:0010383//cell wall polysaccharide metabolic process;GO:0044260//cellular macromolecule metabolic process;GO:0042546//cell wall biogenesis;GO:0044264//cellular pol…	K08235//xyloglucan:xyloglucosyl transferase [EC:2.4.1.207]
101258314	4.09852	3.04985e-09	1.52615	0.00615271	Known_gene	59967937	59971028	NC_015447.2	0.04	0	0.05	0.06	0.08	0.14	0.04	0	0	0.08	0.42	0.16	1.52615	0.00615271	0.0304846	4.09852	3.04985e-09	2.18115e-08		K16675//palmitoyltransferase ZDHHC9/14/18 [EC:2.3.1.225]
101258248	2.00202	6.14219e-189	0.643816	7.73404e-20	Known_gene	523938	528736	NC_015441.2	3.76	4.29	5.03	7.04	5.72	7.84	2.94	3.47	3.35	8.7	18.73	11.93	0.643816	7.73404e-20	2.39606e-19	2.00202	6.14219e-189	1.07059e-188		K09510//DnaJ homolog subfamily B member 4
101258203	2.3041	2.08842e-237	-0.966024	2.79191e-83	Known_gene	96143038	96149007	NC_015438.2	3.77	5.94	6.34	2.67	2.01	3.35	0.62	1.05	1.14	4.45	4.28	5.11	-0.966024	2.79191e-83	4.59614e-83	2.3041	2.08842e-237	3.00768e-237	GO:0050896//response to stimulus;GO:0098542//defense response to other organism;GO:0009987//cellular process;GO:0007186//G-protein coupled receptor signaling pathway;GO:0051704//multi-organism process;GO:0007165//signal transduction;GO:0009607//response to biotic stimulus;GO:0042742//defense response to bacterium;GO:0043207//response to external biotic stimulus;GO:0006952//defense response;GO:000…	K04630//guanine nucleotide-binding protein G(i) subunit alpha;K04630//guanine nucleotide-binding protein G(i) subunit alpha
101258120	2.07205	5.90261e-12	0.334456	0.0613533	Known_gene	45551647	45553335	NC_015439.2	0.22	0.23	0.17	0.28	0.37	0.13	0.14	0.06	0.26	0.6	0.41	0.98	0.334456	0.0613533	0.336848	2.07205	5.90261e-12	3.95765e-11		K08237//hydroquinone glucosyltransferase [EC:2.4.1.218]
101258097	2.26963	2.21876e-07	1.36265	0.00360943	Known_gene	3468589	3471137	NC_015446.2	0.03	0.03	0.05	0.07	0.15	0.06	0.04	0.08	0	0.22	0.21	0.15	1.36265	0.00360943	0.0175272	2.26963	2.21876e-07	1.67557e-06		K11000//callose synthase [EC:2.4.1.-];K17285//selenium-binding protein 1
101258089	2.65106	0.000556402	0.384679	0.0563357	Known_gene	61239851	61246348	NC_015445.2	0.03	0.19	0.18	0.26	0.14	0.11	0.03	0	0	0.06	0.07	0.06	0.384679	0.0563357	0.307503	2.65106	0.000556402	0.00484475		K01528//dynamin GTPase [EC:3.6.5.5]+ko04144//Endocytosis
101258043	6.47113	1.24487e-137	0.15522	0.150817	Known_gene	52158110	52159585	NC_015440.2	0.06	0	0.04	0.06	0.06	0	0.09	0.06	0.07	5.41	8.16	6.14	0.15522	0.150817	0.886379	6.47113	1.24487e-137	2.73758e-137		K12130//pseudo-response regulator 5+ko04712//Circadian rhythm - plant
101258040	2.65106	0.000556402	-3.2812	0.00859172	Known_gene	4452490	4453394	NC_015449.2	0	0	0.19	0	0	0	0	0	0.08	0.12	0.18	0.22	-3.2812	0.00859172	0.0431431	2.65106	0.000556402	0.00484475
101257944	2.89207	0.000160361	2.50016	0.00167513	Known_gene	251847	257307	NW_004194387.1	0	0	0.03	0.07	0.04	0.09	0	0.02	0.02	0.09	0.02	0.17	2.50016	0.00167513	0.0079538	2.89207	0.000160361	0.00135364		K14803//protein phosphatase PTC2/3 [EC:3.1.3.16];K14803//protein phosphatase PTC2/3 [EC:3.1.3.16]
101257896	3.84617	1.84476e-104	0.293645	0.015211	Known_gene	82696730	82705411	NC_015438.2	0.33	0.55	0.84	1.1	0.57	0.46	0.13	0.09	0.26	1.99	1.45	3.63	0.293645	0.015211	0.0779379	3.84617	1.84476e-104	4.91625e-104	GO:0016787//hydrolase activity;GO:0008233//peptidase activity;GO:0003824//catalytic activity;GO:0004175//endopeptidase activity;GO:0008236//serine-type peptidase activity;GO:0017171//serine hydrolase activity;GO:0004252//serine-type endopeptidase activity;GO:0070011//peptidase activity, acting on L-amino acid peptides;	K04733//interleukin-1 receptor-associated kinase 4 [EC:2.7.11.1];K13199//plasminogen activator inhibitor 1 RNA-binding protein;K01183//chitinase [EC:3.2.1.14]+ko00520//Amino sugar and nucleotide sugar metabolism+ko01100//Metabolic pathways;K12663//Delta(3,5)-Delta(2,4)-dienoyl-CoA isomerase [EC:5.3.3.-]+ko04146//Peroxisome;K15333//tRNA guanosine-2'-O-methyltransferase [EC:2.1.1.34];K12619//5'-3' …
101257847	2.03741	7.10069e-92	0.677254	5.28083e-09	Known_gene	69127369	69130472	NC_015440.2	1.42	2.14	2.18	3.66	2.18	3.39	0.41	1.54	3.77	5.81	11.16	6.06	0.677254	5.28083e-09	2.03187e-08	2.03741	7.10069e-92	2.04671e-91		K14004//protein transport protein SEC13+ko04141//Protein processing in endoplasmic reticulum+ko03013//RNA transport
101257649	2.83417	7.76636e-28	-0.420941	0.00109817	Known_gene	1489	2814	NW_004195941.1	1	1.63	1.84	1.42	0.72	1.23	0.32	0.05	0.14	1.97	1.03	0.53	-0.420941	0.00109817	0.0051536	2.83417	7.76636e-28	4.04899e-27		K18674//N-acetylgalactosamine kinase [EC:2.7.1.157]
101257639	4.09852	3.04985e-09	-0.959275	0.0180873	Known_gene	51995359	51997770	NC_015449.2	0.14	0.21	0.27	0.18	0.07	0.07	0.04	0.04	0	0.41	0.36	0.49	-0.959275	0.0180873	0.0934511	4.09852	3.04985e-09	2.18115e-08		K11253//histone H3;K12126//phytochrome-interacting factor 3+ko04712//Circadian rhythm - plant+ko04075//Plant hormone signal transduction
101257588	2.58299	0	-0.961515	3.50529e-90	Known_gene	59177148	59182033	NC_015445.2	12.88	16.75	12.8	5.78	5.56	8.35	5.06	7.62	6.5	29.53	26.14	45.88	-0.961515	3.50529e-90	5.51513e-90	2.58299	0	0	GO:0009987//cellular process;GO:0071554//cell wall organization or biogenesis;GO:0016043//cellular component organization;GO:0045229//external encapsulating structure organization;GO:0071555//cell wall organization;GO:0071840//cellular component organization or biogenesis;GO:0005623//cell;GO:0005618//cell wall;GO:0030312//external encapsulating structure;GO:0071944//cell periphery;GO:0044464//cel…	K19882//O-palmitoleoyl-L-serine hydrolase [EC:3.1.1.98];K19882//O-palmitoleoyl-L-serine hydrolase [EC:3.1.1.98];K19882//O-palmitoleoyl-L-serine hydrolase [EC:3.1.1.98];K19882//O-palmitoleoyl-L-serine hydrolase [EC:3.1.1.98];K19882//O-palmitoleoyl-L-serine hydrolase [EC:3.1.1.98]
101257538	2.11993	1.05723e-13	1.17735	0.00137621	Known_gene	2121588	2124124	NC_015440.2	0.06	0.16	0.02	0.09	0.23	0.21	0.11	0.16	0.13	0.16	1.02	0.55	1.17735	0.00137621	0.00649664	2.11993	1.05723e-13	6.8418e-13		K12869//crooked neck+ko03040//Spliceosome
101257504	3.09944	5.08214e-147	0.376929	4.43679e-05	Known_gene	3624902	3629581	NC_015446.2	1.9	2.8	1.41	2.17	1.8	3.89	0.31	0.79	0.7	4.61	4.5	6.87	0.376929	4.43679e-05	0.000194501	3.09944	5.08214e-147	1.06341e-146	GO:0032774//RNA biosynthetic process;GO:0034645//cellular macromolecule biosynthetic process;GO:0044271//cellular nitrogen compound biosynthetic process;GO:0019219//regulation of nucleobase-containing compound metabolic process;GO:0010467//gene expression;GO:0006351//transcription, DNA-templated;GO:0050794//regulation of cellular process;GO:0060255//regulation of macromolecule metabolic process;G…	K09287//RAV-like factor
101257473	9.74622	1.08306e-70	0.84808	0.061701	Known_gene	748117	749629	NC_015443.2	0.02	0.05	0.02	0.07	0.1	0	0	0	0	0.03	10.09	0.03	0.84808	0.061701	0.338961	9.74622	1.08306e-70	3.65056e-70		K14491//two-component response regulator ARR-B family+ko04075//Plant hormone signal transduction
101257443	2.2586	3.21247e-123	0.106242	0.0486156	Known_gene	6720356	6721640	NC_015449.2	4.32	4.76	2.97	3.1	4.6	5.33	1.81	2.16	2.08	3.53	16.57	9.39	0.106242	0.0486156	0.26281	2.2586	3.21247e-123	7.63324e-123		K21026//acetylajmaline esterase [EC:3.1.1.80]+ko00901//Indole alkaloid biosynthesis+ko01110//Biosynthesis of secondary metabolites
101257410	2.46404	0	0.185353	0.00131683	Known_gene	4272374	4277027	NC_015447.2	5.08	6.92	5.06	7.07	5.29	7.07	3.48	3.79	4.34	6.08	46.91	10.02	0.185353	0.00131683	0.00620617	2.46404	0	0
101257388	6.6061	4.99068e-13	-0.0681221	0.139136	Known_gene	63145786	63148000	NC_015444.2	0.93	1.19	0.08	0.88	0.54	0.64	0	0	0	0.36	1.04	0.76	-0.0681221	0.139136	0.813673	6.6061	4.99068e-13	3.27077e-12		K09422//myb proto-oncogene protein, plant
101257375	3.99265	0	0.802083	6.73937e-46	Known_gene	65336646	65339026	NC_015442.2	6.12	9.7	8.73	18.22	8.63	16.46	5.56	6.84	6.78	8.05	277.84	11.94	0.802083	6.73937e-46	1.52048e-45	3.99265	0	0		K08235//xyloglucan:xyloglucosyl transferase [EC:2.4.1.207];K04733//interleukin-1 receptor-associated kinase 4 [EC:2.7.11.1];K16219//protein N-terminal methyltransferase [EC:2.1.1.244];K04733//interleukin-1 receptor-associated kinase 4 [EC:2.7.11.1]
101257315	3.09852	4.5395e-05	0.566794	0.00633259	Known_gene	98277180	98277833	NC_015438.2	0.82	0.83	1.85	1.2	2.56	1.42	0	0.15	0	0.4	0.76	0.11	0.566794	0.00633259	0.0314011	3.09852	4.5395e-05	0.000373483	GO:0043167//ion binding;GO:0005488//binding;GO:0046914//transition metal ion binding;GO:0043169//cation binding;GO:0046872//metal ion binding;GO:0008270//zinc ion binding;	K02995//small subunit ribosomal protein S8e+ko03010//Ribosome;K02995//small subunit ribosomal protein S8e+ko03010//Ribosome
101257267	2.2301	4.67041e-22			Known_gene	26104061	26110420	NC_015443.2	0	0	0	0.01	0	0.01	0.03	0.09	0.12	0.33	0.45	0.33				2.2301	4.67041e-22	2.64188e-21		K05666//ATP-binding cassette, subfamily C (CFTR/MRP), member 2+ko02010//ABC transporters
101257266	2.28988	1.32398e-08			Known_gene	885659	888399	NC_015443.2	0	0	0	0.03	0.01	0	0.01	0.05	0.08	0.29	0.25	0.16				2.28988	1.32398e-08	9.62491e-08		K13420//LRR receptor-like serine/threonine-protein kinase FLS2 [EC:2.7.11.1]+ko04626//Plant-pathogen interaction+ko04016//MAPK signaling pathway - plant
101257219	2.10245	0	-0.563849	3.36757e-33	Known_gene	46299935	46303057	NC_015447.2	11.9	17.7	17.88	4.89	7.27	20.7	9.02	8.01	10.25	30.87	46.55	40.91	-0.563849	3.36757e-33	8.68658e-33	2.10245	0	0		K01102//pyruvate dehydrogenase phosphatase [EC:3.1.3.43]
101257022	2.35252	4.65555e-57	0.932114	2.79691e-10	Known_gene	96112632	96115182	NC_015438.2	0.53	0.6	0.58	1.53	0.81	0.91	0.32	0.37	0.52	2	2.01	2.17	0.932114	2.79691e-10	1.043e-09	2.35252	4.65555e-57	1.76079e-56		K17964//leucine-rich PPR motif-containing protein, mitochondrial
101257019	3.29597	8.5992e-11	0.403295	0.0774309	Known_gene	2687928	2689498	NC_015447.2	0.02	0.13	0.15	0.15	0.13	0.12	0.02	0.04	0.05	0.09	0.73	0.27	0.403295	0.0774309	0.430932	3.29597	8.5992e-11	5.91349e-10		K13800//UMP-CMP kinase [EC:2.7.4.- 2.7.4.14]+ko01100//Metabolic pathways+ko00240//Pyrimidine metabolism;K04733//interleukin-1 receptor-associated kinase 4 [EC:2.7.11.1];K19589//release factor glutamine methyltransferase [EC:2.1.1.297]
101256994	2.1551	6.10853e-65	0.612928	1.70608e-08	Known_gene	44790997	44795062	NC_015445.2	1.7	3.31	2.52	4.54	3.14	4.18	1.04	1.46	1.19	4.83	5.24	6.37	0.612928	1.70608e-08	6.64834e-08	2.1551	6.10853e-65	2.16012e-64
101256890	2.9312	0	0.958012	1.73904e-91	Known_gene	38542844	38544206	NC_015443.2	14.34	9.6	9.9	12.1	24.44	29.95	3.16	2.64	1.29	22.51	13.43	18.73	0.958012	1.73904e-91	2.71225e-91	2.9312	0	0
101256864	4.99898	3.09451e-30	2.62569	0.0087471	Known_gene	62815635	62818571	NC_015440.2	0	0.02	0	0.06	0	0.06	0.08	0	0	0.1	2.24	0.16	2.62569	0.0087471	0.0439835	4.99898	3.09451e-30	1.56158e-29		K06067//histone deacetylase 1/2 [EC:3.5.1.98]
101256846	4.36155	0.000214959	1.94762	0.00166261	Known_gene	61484509	61488557	NC_015440.2	0.02	0.02	0	0.05	0.04	0.07	0	0	0	0.01	0.09	0.02	1.94762	0.00166261	0.00788658	4.36155	0.000214959	0.00182716		K09518//DnaJ homolog subfamily B member 12+ko04141//Protein processing in endoplasmic reticulum;K09511//DnaJ homolog subfamily B member 5;K09510//DnaJ homolog subfamily B member 4
101256828	3.19163	0.000954873	0.0407248	0.162435	Known_gene	47234917	47235520	NC_015439.2	0	0.24	0.12	0	0.12	0.26	0	0	0.06	0.06	0.14	0.42	0.0407248	0.162435	0.961003	3.19163	0.000954873	0.00844485		K14488//SAUR family protein+ko04075//Plant hormone signal transduction
101256822	2.38474	1.22092e-63	0.235604	0.0124007	Known_gene	64389409	64393225	NC_015447.2	0.79	0.82	1.34	1	0.93	1.6	0.35	0.52	0.34	0.7	4.8	0.68	0.235604	0.0124007	0.0631429	2.38474	1.22092e-63	4.36677e-63
101256817	2.60312	0	0.0786171	0.0105529	Known_gene	58372746	58373762	NC_015447.2	16.64	35.88	31.64	12.77	25.58	52.45	4.33	6.05	12.23	36.94	44.92	58.08	0.0786171	0.0105529	0.0534005	2.60312	0	0	GO:0046872//metal ion binding;GO:0005509//calcium ion binding;GO:0005488//binding;GO:0043167//ion binding;GO:0043169//cation binding;	K13448//calcium-binding protein CML+ko04626//Plant-pathogen interaction
101256795	2.55332	1.7268e-179	0.227464	3.7337e-07	Known_gene	64220753	64226193	NC_015445.2	4.99	7.29	9.82	10.46	7.63	8.78	0.83	0.86	1.18	6.35	4.75	7.18	0.227464	3.7337e-07	1.51513e-06	2.55332	1.7268e-179	3.12515e-179	GO:0005488//binding;GO:0005515//protein binding;GO:0046983//protein dimerization activity;	K13422//transcription factor MYC2+ko04016//MAPK signaling pathway - plant+ko04075//Plant hormone signal transduction;K04733//interleukin-1 receptor-associated kinase 4 [EC:2.7.11.1];K01772//protoporphyrin/coproporphyrin ferrochelatase [EC:4.99.1.1 4.99.1.9]+ko00860//Porphyrin and chlorophyll metabolism+ko01100//Metabolic pathways+ko01110//Biosynthesis of secondary metabolites;K13422//transcriptio…
101256762	2.04407	1.78956e-32	0.981831	6.52569e-11	Known_gene	5262066	5265222	NC_015441.2	1.22	1.77	1.33	3.44	3.09	1.96	0.81	0.76	1	3.18	3.09	4.61	0.981831	6.52569e-11	2.39529e-10	2.04407	1.78956e-32	8.76478e-32		K12486//stromal membrane-associated protein+ko04144//Endocytosis
101256758	2.53168	9.24862e-134	-0.598204	1.95374e-13	Known_gene	63062245	63063460	NC_015440.2	5.94	7.96	7.17	3.45	3.24	7.44	0.46	1.16	3.53	4.47	17.15	7.75	-0.598204	1.95374e-13	6.79202e-13	2.53168	9.24862e-134	2.07024e-133
101256638	4.36356	6.42501e-11	-0.374313	0.126295	Known_gene	64036512	64039326	NC_015447.2	0.04	0.04	0	0.02	0.04	0	0	0.04	0	0	0.75	0.03	-0.374313	0.126295	0.732744	4.36356	6.42501e-11	4.40437e-10		K15472//premnaspirodiene oxygenase [EC:1.14.13.121]+ko00909//Sesquiterpenoid and triterpenoid biosynthesis+ko01110//Biosynthesis of secondary metabolites;K00512//steroid 17alpha-monooxygenase / 17alpha-hydroxyprogesterone deacetylase [EC:1.14.14.19 1.14.14.32]+ko01100//Metabolic pathways
101256625	2.17879	0	0.784834	2.79149e-54	Known_gene	75335452	75336646	NC_015438.2	11.28	15.22	9.43	14.42	21.16	26.73	6.81	8.45	12.46	37.48	48.55	39.45	0.784834	2.79149e-54	5.83049e-54	2.17879	0	0
101256592	2.21786	3.5543e-59	0.411244	0.000822367	Known_gene	61871781	61873614	NC_015442.2	1.5	0.77	1.3	1.37	1.82	1.59	0.44	0.72	1.08	1.29	7.69	1.11	0.411244	0.000822367	0.00383146	2.21786	3.5543e-59	1.31724e-58		K17080//prohibitin 1
101256584	2.17757	4.77488e-117	0.678274	4.1491e-28	Known_gene	64475684	64478737	NC_015441.2	7.81	9.03	8.79	13.8	12.74	15.61	1.91	2.63	2.59	7.72	15.09	10.29	0.678274	4.1491e-28	1.13756e-27	2.17757	4.77488e-117	1.18327e-116	GO:0016020//membrane;GO:0044425//membrane part;GO:0031224//intrinsic component of membrane;GO:0016021//integral component of membrane;
101256534	3.99898	0.000827378	2.62569	0.0087471	Known_gene	60583406	60586787	NC_015447.2	0	0.02	0	0.08	0.02	0.02	0	0	0	0.06	0.09	0	2.62569	0.0087471	0.0439835	3.99898	0.000827378	0.00727831		K13436//pto-interacting protein 1 [EC:2.7.11.1]+ko04626//Plant-pathogen interaction
101256446	2.03963	7.26229e-44	0.389874	0.0123385	Known_gene	42011172	42014458	NC_015439.2	1.09	1.94	1.51	2.18	2.15	1.63	1.37	2.17	2.03	5.82	9.73	7.82	0.389874	0.0123385	0.0627887	2.03963	7.26229e-44	3.12528e-43		K14819//dual specificity phosphatase 12 [EC:3.1.3.16 3.1.3.48]
101256342	2.40108	7.32952e-13	0.441263	0.00418229	Known_gene	48282857	48287353	NC_015439.2	0.68	0.67	0.43	0.5	0.94	0.99	0.13	0.04	0.13	0.48	0.46	0.65	0.441263	0.00418229	0.020432	2.40108	7.32952e-13	4.81612e-12		K09587//steroid 22-alpha-hydroxylase [EC:1.14.13.-]+ko00905//Brassinosteroid biosynthesis+ko01100//Metabolic pathways+ko01110//Biosynthesis of secondary metabolites
101256279	2.23116	3.83174e-07	-0.544238	0.0497281	Known_gene	64466754	64469810	NC_015441.2	0.15	0.02	0.27	0.11	0.11	0.09	0.04	0.09	0.07	0.14	0.56	0.24	-0.544238	0.0497281	0.26933	2.23116	3.83174e-07	2.91667e-06		K11426//SET and MYND domain-containing protein
101256252	2.42849	4.94133e-74	-0.952186	0.101261	Known_gene	55011844	55035915	NC_015448.2	0	0	0.05	0.03	0	0	0.69	1.27	0.36	4.17	4.54	4.3	-0.952186	0.101261	0.575576	2.42849	4.94133e-74	1.62152e-73	GO:0046700//heterocycle catabolic process;GO:0046113//nucleobase catabolic process;GO:0006144//purine nucleobase metabolic process;GO:0044281//small molecule metabolic process;GO:0046110//xanthine metabolic process;GO:0071704//organic substance metabolic process;GO:0072521//purine-containing compound metabolic process;GO:0008152//metabolic process;GO:0009987//cellular process;GO:0055114//oxidatio…	K09842//abscisic-aldehyde oxidase [EC:1.2.3.14]+ko00906//Carotenoid biosynthesis+ko01100//Metabolic pathways+ko01110//Biosynthesis of secondary metabolites;K09842//abscisic-aldehyde oxidase [EC:1.2.3.14]+ko00906//Carotenoid biosynthesis+ko01100//Metabolic pathways+ko01110//Biosynthesis of secondary metabolites
101256235	2.17713	7.71696e-15	-0.659715	0.00428507	Known_gene	54407531	54408657	NC_015439.2	0.68	1.2	0.85	0.46	0.51	0.77	0.26	0.46	0.36	1.67	1.52	1.77	-0.659715	0.00428507	0.0209412	2.17713	7.71696e-15	4.89372e-14		K09555//BCL2-associated athanogene 1+ko04141//Protein processing in endoplasmic reticulum
101256093	3.77659	8.02534e-13	1.04072	0.00715315	Known_gene	752949	755545	NC_015443.2	0.08	0.03	0.05	0.12	0.13	0.07	0	0.04	0.01	0.25	0.2	0.29	1.04072	0.00715315	0.0356027	3.77659	8.02534e-13	5.27914e-12		K04733//interleukin-1 receptor-associated kinase 4 [EC:2.7.11.1];K15271//ATP-dependent DNA helicase HFM1/MER3 [EC:3.6.4.12]
101256080	5.58395	1.08914e-07			Known_gene	66055114	66056569	NC_015440.2	0	0	0	0	0	0	0	0	0	0	0.67	0				5.58395	1.08914e-07	8.13703e-07
101255977	5.09852	4.40197e-06	0.362653	0.12228	Known_gene	63987832	63989646	NC_015440.2	0.07	0	0.02	0.02	0.02	0.07	0	0	0	0.09	0.12	0.18	0.362653	0.12228	0.706986	5.09852	4.40197e-06	3.47333e-05
101255969	2.0661	3.27237e-06	0.80626	0.00278936	Known_gene	38639757	38642723	NC_015449.2	0.18	0.14	0.27	0.28	0.47	0.3	0.04	0.02	0.13	0.26	0.36	0.14	0.80626	0.00278936	0.0134506	2.0661	3.27237e-06	2.57051e-05		K14963//COMPASS component SWD3;K16794//platelet-activating factor acetylhydrolase IB subunit alpha+ko01100//Metabolic pathways+ko00565//Ether lipid metabolism;K03362//F-box and WD-40 domain protein 1/11+ko04120//Ubiquitin mediated proteolysis
101255918	3.56667	1.10615e-19	-0.170779	0.103944	Known_gene	79154306	79155984	NC_015438.2	0.5	0.82	0.16	0.23	0.54	0.54	0.1	0.03	0.14	0.93	1.44	0.89	-0.170779	0.103944	0.59246	3.56667	1.10615e-19	6.46724e-19		K07119//uncharacterized protein;K19825//2-alkenal reductase (NADP+) [EC:1.3.1.102]
101255851	5.51356	1.9939e-07	1.04072	0.0262051	Known_gene	45577330	45579020	NC_015439.2	0.09	0	0.04	0	0.15	0.11	0	0	0	0.11	0.24	0.15	1.04072	0.0262051	0.137295	5.51356	1.9939e-07	1.50297e-06		K13065//shikimate O-hydroxycinnamoyltransferase [EC:2.3.1.133]+ko01100//Metabolic pathways+ko01110//Biosynthesis of secondary metabolites+ko00940//Phenylpropanoid biosynthesis+ko00941//Flavonoid biosynthesis+ko00945//Stilbenoid, diarylheptanoid and gingerol biosynthesis
101255842	2.13023	4.14388e-05	1.23337	0.00115261	Known_gene	46312270	46314806	NC_015447.2	0.05	0.12	0.06	0.15	0.21	0.17	0.02	0.05	0.03	0.19	0.11	0.13	1.23337	0.00115261	0.00541447	2.13023	4.14388e-05	0.000340333		K11584//serine/threonine-protein phosphatase 2A regulatory subunit B'+ko03015//mRNA surveillance pathway;K03294//basic amino acid/polyamine antiporter, APA family
101255759	3.27264	0	-0.226971	0.00809838	Known_gene	51761636	51772988	NC_015448.2	1.53	1.78	1.45	1.87	1.03	1.02	2.28	2.33	2.61	1.43	67.04	1.26	-0.226971	0.00809838	0.0405144	3.27264	0	0		K12447//UDP-sugar pyrophosphorylase [EC:2.7.7.64]+ko00520//Amino sugar and nucleotide sugar metabolism+ko00040//Pentose and glucuronate interconversions+ko01100//Metabolic pathways+ko00052//Galactose metabolism+ko00053//Ascorbate and aldarate metabolism;K21989//calcium permeable stress-gated cation channel;K13356//alcohol-forming fatty acyl-CoA reductase [EC:1.2.1.84]+ko04146//Peroxisome+ko00073/…
101255680	3.19163	0.000954873			Known_gene	63060037	63062117	NC_015440.2	0	0	0	0	0	0.03	0	0	0.02	0	0.11	0.04				3.19163	0.000954873	0.00844485		K11380//NuA3 HAT complex component NTO1;K11422//histone-lysine N-methyltransferase SETD1 [EC:2.1.1.43]+ko00310//Lysine degradation
101255674	2.16093	1.69903e-48	0.640461	2.55122e-13	Known_gene	63757437	63764705	NC_015449.2	7.96	5.85	5.1	7.91	13.18	7.38	1.56	1.68	1.07	8.39	4.77	6.04	0.640461	2.55122e-13	8.89299e-13	2.16093	1.69903e-48	6.98445e-48	GO:0046872//metal ion binding;GO:0043167//ion binding;GO:0005488//binding;GO:0043169//cation binding;	K09377//cysteine and glycine-rich protein;K09377//cysteine and glycine-rich protein
101255639	2.05311	2.05763e-32	0.0996185	0.117397	Known_gene	91559515	91564589	NC_015438.2	0.08	0.28	0.23	0.33	0.1	0.21	0.14	0.18	0.3	0.57	0.92	1.11	0.0996185	0.117397	0.675529	2.05311	2.05763e-32	1.00883e-31	GO:0051716//cellular response to stimulus;GO:0050789//regulation of biological process;GO:0050794//regulation of cellular process;GO:0006950//response to stress;GO:0007154//cell communication;GO:0007165//signal transduction;GO:0065007//biological regulation;GO:0050896//response to stimulus;GO:0009987//cellular process;GO:0006952//defense response;GO:0023052//signaling;GO:0036094//small molecule b…	K19613//leucine-rich repeat protein SHOC2;K03283//heat shock 70kDa protein 1/8+ko03040//Spliceosome+ko04144//Endocytosis+ko04141//Protein processing in endoplasmic reticulum;K00695//sucrose synthase [EC:2.4.1.13]+ko01100//Metabolic pathways+ko00500//Starch and sucrose metabolism
101255585	2.95024	1.66478e-53	0.729685	5.69593e-08	Known_gene	55523811	55526407	NC_015441.2	1.13	1.43	1.22	1.98	1.8	2.53	0.26	0.41	0.34	2.06	2.23	3.88	0.729685	5.69593e-08	2.25752e-07	2.95024	1.66478e-53	6.51446e-53		K04079//molecular chaperone HtpG+ko04141//Protein processing in endoplasmic reticulum+ko04626//Plant-pathogen interaction;K08955//ATP-dependent metalloprotease [EC:3.4.24.-]
101255534	2.72834	0	0.603548	1.77296e-20	Known_gene	66503836	66511476	NC_015446.2	3.07	3.7	2.78	5.29	4.4	4.73	2.52	2.3	2.77	3.08	41.5	4.35	0.603548	1.77296e-20	5.42743e-20	2.72834	0	0	GO:0044238//primary metabolic process;GO:0016567//protein ubiquitination;GO:0044265//cellular macromolecule catabolic process;GO:0008152//metabolic process;GO:0042787//protein ubiquitination involved in ubiquitin-dependent protein catabolic process;GO:0032446//protein modification by small protein conjugation;GO:0044257//cellular protein catabolic process;GO:1901564//organonitrogen compound metab…	K03347//cullin 1+ko04141//Protein processing in endoplasmic reticulum+ko04120//Ubiquitin mediated proteolysis;K03347//cullin 1+ko04141//Protein processing in endoplasmic reticulum+ko04120//Ubiquitin mediated proteolysis
101255419	3.99898	0.000827378	1.84808	0.00274137	Known_gene	61830240	61835372	NC_015445.2	0.01	0.02	0.01	0.02	0.06	0.05	0	0	0	0.02	0.01	0.05	1.84808	0.00274137	0.0132124	3.99898	0.000827378	0.00727831	GO:0008152//metabolic process;GO:0044237//cellular metabolic process;GO:0006464//cellular protein modification process;GO:0008213//protein alkylation;GO:0006325//chromatin organization;GO:0016569//covalent chromatin modification;GO:0043414//macromolecule methylation;GO:0006807//nitrogen compound metabolic process;GO:0019538//protein metabolic process;GO:0071704//organic substance metabolic proces…	K11420//euchromatic histone-lysine N-methyltransferase [EC:2.1.1.43]+ko00310//Lysine degradation
101255354	4.5542	5.07946e-37	0.93381	0.00905212	Known_gene	47379785	47381248	NC_015439.2	0.12	0.1	0.11	0.16	0.24	0.22	0.02	0.12	0.02	0.12	3.63	0.03	0.93381	0.00905212	0.045582	4.5542	5.07946e-37	2.3613e-36		K01711//GDPmannose 4,6-dehydratase [EC:4.2.1.47]+ko00520//Amino sugar and nucleotide sugar metabolism+ko01100//Metabolic pathways+ko00051//Fructose and mannose metabolism
101255309	2.3262	1.07015e-108	0.574062	7.76389e-08	Known_gene	980429	984467	NC_015444.2	1.1	1.9	1.43	2.52	1.29	2.76	0.56	0.91	1.44	2.11	9.42	2.82	0.574062	7.76389e-08	3.08888e-07	2.3262	1.07015e-108	2.78103e-108	GO:0006415//translational termination;GO:0009987//cellular process;GO:0043170//macromolecule metabolic process;GO:0043604//amide biosynthetic process;GO:0009058//biosynthetic process;GO:0022411//cellular component disassembly;GO:0043043//peptide biosynthetic process;GO:1901576//organic substance biosynthetic process;GO:0043933//macromolecular complex subunit organization;GO:0034641//cellular nitr…	K03265//peptide chain release factor subunit 1+ko03015//mRNA surveillance pathway
101255237	5.36155	1.38627e-20	-1.24878	0.0044306	Known_gene	81179090	81183734	NC_015438.2	0.13	0.04	0.09	0	0.05	0.06	0	0	0.03	0.03	0.96	0	-1.24878	0.0044306	0.0216719	5.36155	1.38627e-20	7.99951e-20		K20393//PRA1 family protein 3;K16219//protein N-terminal methyltransferase [EC:2.1.1.244]
101255116	6.02452	7.48388e-17	0.0407248	0.163923	Known_gene	62977632	62978119	NC_015444.2	0	0	0.22	0.15	0	0.08	0	0	0.08	0.99	1.91	2.5	0.0407248	0.163923	0.972419	6.02452	7.48388e-17	4.57351e-16
101255098	2.56798	1.65443e-284	0.952615	1.59149e-124	Known_gene	65393382	65395621	NC_015442.2	20.6	19.53	18.93	35.96	39.93	39.02	3.55	3.76	4.35	22.51	19.97	28.08	0.952615	1.59149e-124	2.02789e-124	2.56798	1.65443e-284	2.08547e-284		K09872//aquaporin PIP
101255082	4.09852	9.46859e-06	1.04072	0.0419832	Known_gene	63121269	63121763	NC_015440.2	0	0.15	0.14	0	0.23	0.4	0	0.07	0	0.4	0.34	0.64	1.04072	0.0419832	0.225029	4.09852	9.46859e-06	7.56864e-05		K04505//presenilin 1 [EC:3.4.23.-]
101255038	2.83852	1.08262e-62	0.549189	0.000103266	Known_gene	94370267	94373663	NC_015438.2	0.5	0.79	0.16	0.91	0.54	0.63	0.08	0.17	0.34	0.87	1.32	2.24	0.549189	0.000103266	0.000459712	2.83852	1.08262e-62	3.90183e-62		K00924//
101254992	2.0956	6.70161e-32	0.943657	1.74881e-11	Known_gene	60149130	60155872	NC_015441.2	0.59	0.42	0.27	0.8	0.87	0.81	0.23	0.2	0.17	0.84	0.7	1.06	0.943657	1.74881e-11	6.34168e-11	2.0956	6.70161e-32	3.31036e-31		K15271//ATP-dependent DNA helicase HFM1/MER3 [EC:3.6.4.12]
101254991	2.07258	0	0.88054	6.31001e-232	Known_gene	55515433	55518847	NC_015441.2	23.13	28.06	38.62	53.23	49.62	64.37	15.73	17.38	20.24	46.68	131.65	42.37	0.88054	6.31001e-232	5.11494e-232	2.07258	0	0		K03875//F-box and leucine-rich repeat protein 1 (S-phase kinase-associated protein 2)+ko04120//Ubiquitin mediated proteolysis
101254974	3.12697	1.9035e-111	0.917453	4.47735e-09	Known_gene	1699301	1700333	NC_015449.2	1.69	0.75	1.42	2.02	2.86	2.48	0.58	0.91	1.18	1.65	19.41	1.51	0.917453	4.47735e-09	1.72026e-08	3.12697	1.9035e-111	4.86783e-111		K09287//RAV-like factor
101254972	6.02452	7.48388e-17			Known_gene	37260549	37261878	NC_015439.2	0	0	0	0.05	0.03	0.03	0	0	0.03	0.05	1.54	0.07				6.02452	7.48388e-17	4.57351e-16		K09286//EREBP-like factor
101254968	3.19163	0.000954873	0.0407248	0.159722	Known_gene	17288811	17291048	NC_015448.2	0	0.11	0.24	0.14	0.14	0.09	0	0.03	0	0.09	0.03	0.15	0.0407248	0.159722	0.942624	3.19163	0.000954873	0.00844485		K21026//acetylajmaline esterase [EC:3.1.1.80]+ko00901//Indole alkaloid biosynthesis+ko01110//Biosynthesis of secondary metabolites;K00679//phospholipid:diacylglycerol acyltransferase [EC:2.3.1.158]+ko00561//Glycerolipid metabolism
101254869	2.03	6.46879e-166	0.546289	1.90422e-11	Known_gene	55957228	55958188	NC_015448.2	5.76	6.77	5.47	7.67	8.76	10.02	3.46	7.22	4.19	13.85	23.35	25.84	0.546289	1.90422e-11	6.91154e-11	2.03	6.46879e-166	1.23602e-165
101254847	3.85459	9.30913e-11	1.04072	0.096168	Known_gene	56056850	56057997	NC_015447.2	0	0	0.04	0.04	0.04	0	0	0.12	0	0.95	0.61	0.05	1.04072	0.096168	0.544095	3.85459	9.30913e-11	6.407e-10
101254820	4.19163	0.000419996			Known_gene	5373376	5375640	NC_015438.2	0	0	0	0.02	0	0.02	0	0	0	0.02	0.09	0.04				4.19163	0.000419996	0.00363028		K20617//cytochrome P450 family 71 subfamily A;K11818//cytochrome P450 family 83 subfamily B polypeptide 1 [EC:1.14.-.-]+ko00380//Tryptophan metabolism+ko00966//Glucosinolate biosynthesis+ko01110//Biosynthesis of secondary metabolites+ko01210//2-Oxocarboxylic acid metabolism
101254811	4.61789	7.90035e-13	3.36265	0.00765004	Known_gene	46829256	46832423	NC_015443.2	0	0	0	0.06	0.02	0.02	0	0	0.04	0.41	0.28	0.27	3.36265	0.00765004	0.0382168	4.61789	7.90035e-13	5.19529e-12		K14638//solute carrier family 15 (peptide/histidine transporter), member 3/4
101254809	2.30536	0	-0.196109	0.00236691	Known_gene	42525847	42528583	NC_015443.2	3.63	3.36	3.44	2.51	2.07	4.57	2.61	2.81	2.9	5.36	27.42	6.68	-0.196109	0.00236691	0.0113524	2.30536	0	0
101254790	3.65106	0.000131291	0.0407248	0.164879	Known_gene	58716757	58719676	NC_015441.2	0	0	0.03	0	0	0.03	0.03	0	0	0.03	0.3	0	0.0407248	0.164879	0.984074	3.65106	0.000131291	0.00110417
101254746	2.99898	6.47825e-10	0.970335	0.00218477	Known_gene	63087781	63089425	NC_015447.2	0.12	0.17	0.14	0.27	0.19	0.4	0	0.06	0.07	0.24	0.51	0.26	0.970335	0.00218477	0.0104523	2.99898	6.47825e-10	4.54818e-09
101254732	2.64682	3.60651e-29	-0.948304	1.78007e-06	Known_gene	67544499	67546856	NC_015446.2	0.33	1.02	0.52	0.28	0.17	0.52	0.04	0.01	0.41	0.33	1.22	1.42	-0.948304	1.78007e-06	7.39042e-06	2.64682	3.60651e-29	1.84646e-28		K04733//interleukin-1 receptor-associated kinase 4 [EC:2.7.11.1]
101254709	8.77095	7.31116e-160	3.62569	0.00396452	Known_gene	63434143	63438608	NC_015444.2	0	0	0	0.01	0.03	0.02	0	0	0.02	0.06	7.61	0	3.62569	0.00396452	0.0193431	8.77095	7.31116e-160	1.43217e-159		K03283//heat shock 70kDa protein 1/8+ko03040//Spliceosome+ko04144//Endocytosis+ko04141//Protein processing in endoplasmic reticulum
101254676	2.20965	0	0.760303	4.68033e-218	Known_gene	67330699	67333046	NC_015440.2	19.89	42.08	33.41	14.88	45.5	104.33	13.28	15.5	18.1	83.53	63.25	68.47	0.760303	4.68033e-218	3.98696e-218	2.20965	0	0		K07766//diphosphoinositol-polyphosphate diphosphatase [EC:3.6.1.52];K07766//diphosphoinositol-polyphosphate diphosphatase [EC:3.6.1.52]
101254668	4.36613	8.85491e-151	-0.137776	0.05828	Known_gene	40096485	40098395	NC_015449.2	0.87	2.17	1.32	1.79	0.86	1.31	0.06	0.17	0.46	2.35	4.1	8.45	-0.137776	0.05828	0.318629	4.36613	8.85491e-151	1.82075e-150		K20562//biphenyl-4-hydroxylase
101254558	2.545	0	0.964527	6.0706e-81	Known_gene	41108909	41116037	NC_015439.2	6.39	7.98	4.26	14.11	9.27	12.87	2.22	3.95	3.28	13.91	16.11	27.32	0.964527	6.0706e-81	1.01339e-80	2.545	0	0		K06272//integrin-linked kinase [EC:2.7.11.1]
101254553	2.31204	1.69849e-146	0.840906	2.38823e-30	Known_gene	46478918	46480590	NC_015439.2	4.52	4.01	3.11	7.09	7.55	6.19	1.44	1.5	2.23	4.45	14.63	6.44	0.840906	2.38823e-30	6.35479e-30	2.31204	1.69849e-146	3.56629e-146		K00831//phosphoserine aminotransferase [EC:2.6.1.52]+ko00750//Vitamin B6 metabolism+ko01230//Biosynthesis of amino acids+ko01100//Metabolic pathways+ko00260//Glycine, serine and threonine metabolism+ko01200//Carbon metabolism
101254501	4.42807	0	0.161019	0.0114863	Known_gene	42537988	42538884	NC_015443.2	9.31	9.16	11.52	11.03	10.52	12.42	0.94	4.49	2.76	59.94	51.6	69.99	0.161019	0.0114863	0.05831	4.42807	0	0
101254493	4.65106	1.03341e-07	3.62569	0.00396452	Known_gene	62322278	62324381	NC_015442.2	0	0	0	0.13	0.03	0	0.03	0	0	0.22	0.2	0.25	3.62569	0.00396452	0.0193431	4.65106	1.03341e-07	7.71268e-07
101254466	2.88848	1.83003e-71	0.685066	9.86021e-06	Known_gene	313176	314341	NW_004194387.1	1.92	1.62	0.68	2.41	1.83	2.54	0.72	0.64	0.91	1.06	14.27	0.89	0.685066	9.86021e-06	4.20867e-05	2.88848	1.83003e-71	6.13132e-71		K19040//E3 ubiquitin-protein ligase ATL10/75/76/77/78 [EC:2.3.2.27]
101254410	2.73826	0	0.825922	7.7869e-80	Known_gene	64290275	64292327	NC_015445.2	7.51	9.86	9.67	17.22	13.86	17.07	1.41	2.12	4.38	12.77	16.34	25.01	0.825922	7.7869e-80	1.31274e-79	2.73826	0	0	GO:0051260//protein homooligomerization;GO:0016043//cellular component organization;GO:0065003//macromolecular complex assembly;GO:0070271//protein complex biogenesis;GO:0044085//cellular component biogenesis;GO:0009987//cellular process;GO:0006461//protein complex assembly;GO:0071840//cellular component organization or biogenesis;GO:0051259//protein oligomerization;GO:0071822//protein complex su…
101254409	2.02813	3.60311e-05	1.32083	0.0065414	Known_gene	24287156	24291824	NC_015445.2	0.04	0.1	0	0.09	0.11	0.12	0.04	0.02	0.08	0.12	0.36	0.05	1.32083	0.0065414	0.0324932	2.02813	3.60311e-05	0.000295211		K18789//xylogalacturonan beta-1,3-xylosyltransferase [EC:2.4.2.41]
101254326	2.17652	1.81172e-144	0.982252	3.60951e-32	Known_gene	2718846	2722895	NC_015438.2	3.09	2.88	3.12	5.42	5.2	7.48	2.32	2.27	1.71	9.81	10.33	8.33	0.982252	3.60951e-32	9.42181e-32	2.17652	1.81172e-144	3.84155e-144		K15030//translation initiation factor 3 subunit M
101254271	2.04044	4.39702e-43	0.53105	0.000322144	Known_gene	49997387	50000468	NC_015448.2	0.71	0.92	0.4	1.12	0.93	0.85	0.54	0.61	0.46	2.55	1.78	2.31	0.53105	0.000322144	0.00146803	2.04044	4.39702e-43	1.90725e-42
101254165	2.28355	3.44679e-13	-0.78935	0.000226975	Known_gene	113781	115835	NC_015440.2	0.32	1.03	0.29	0.26	0.35	0.35	0.1	0.14	0.09	0.63	0.36	0.64	-0.78935	0.000226975	0.00102716	2.28355	3.44679e-13	2.25162e-12	GO:0009987//cellular process;GO:0006807//nitrogen compound metabolic process;GO:0034645//cellular macromolecule biosynthetic process;GO:0010467//gene expression;GO:0044260//cellular macromolecule metabolic process;GO:0044267//cellular protein metabolic process;GO:0006412//translation;GO:1901566//organonitrogen compound biosynthetic process;GO:0043603//cellular amide metabolic process;GO:0071704//…	K02881//large subunit ribosomal protein L18+ko03010//Ribosome
101254075	2.77659	2.75113e-24	0.905795	0.0013464	Known_gene	67336120	67338704	NC_015440.2	0.2	0.2	0.38	0.42	0.4	0.66	0.17	0.17	0.3	1.1	1.74	1.56	0.905795	0.0013464	0.00634774	2.77659	2.75113e-24	1.50622e-23
101253999	2.25854	1.00315e-45	0.917066	6.47083e-19	Known_gene	2833266	2834968	NC_015443.2	1.34	1.93	2.26	3.82	2.71	3.99	0.42	0.28	0.93	2.71	2.42	2.63	0.917066	6.47083e-19	2.03816e-18	2.25854	1.00315e-45	4.23855e-45	GO:0043412//macromolecule modification;GO:1901564//organonitrogen compound metabolic process;GO:0044237//cellular metabolic process;GO:0071704//organic substance metabolic process;GO:0006807//nitrogen compound metabolic process;GO:0006793//phosphorus metabolic process;GO:0009987//cellular process;GO:0036211//protein modification process;GO:0044238//primary metabolic process;GO:0044267//cellular p…	K04733//interleukin-1 receptor-associated kinase 4 [EC:2.7.11.1]
101253979	3.09852	4.5395e-05	0.455762	0.117537	Known_gene	11145537	11147111	NC_015440.2	0.06	0.03	0	0	0.03	0.09	0	0.06	0	0	0.41	0.08	0.455762	0.117537	0.677569	3.09852	4.5395e-05	0.000373483		K20858//calcium uniporter protein, mitochondrial
101253978	2.44959	0	-0.0238843	0.118661	Known_gene	10911098	10912326	NC_015440.2	8.74	13.78	11.79	10.94	8.82	14.26	7.83	9.35	10.84	14.59	117.97	16.8	-0.0238843	0.118661	0.684371	2.44959	0	0		K10249//elongation of very long chain fatty acids protein 4 [EC:2.3.1.199]+ko01110//Biosynthesis of secondary metabolites+ko00062//Fatty acid elongation
101253906	3.58395	9.83475e-07			Known_gene	32265006	32268184	NC_015443.2	0	0	0	0	0	0	0.02	0.02	0	0.15	0.07	0.18				3.58395	9.83475e-07	7.57876e-06		K14515//EIN3-binding F-box protein+ko04016//MAPK signaling pathway - plant+ko04075//Plant hormone signal transduction
101253878	2.53409	2.68082e-09	-0.636559	2.86207e-06	Known_gene	203486	205833	NW_004194387.1	1.08	1.49	0.99	0.69	0.52	1.09	0.04	0.03	0.06	0.14	0.4	0.24	-0.636559	2.86207e-06	1.19637e-05	2.53409	2.68082e-09	1.91446e-08		K14209//solute carrier family 36 (proton-coupled amino acid transporter)
101253864	2.30592	1.84506e-160	-0.312612	0.00380817	Known_gene	4844523	4847480	NC_015449.2	1.16	1.47	2.3	1.64	0.8	1.58	2.16	1.14	1.95	7.79	9.13	9.32	-0.312612	0.00380817	0.0185195	2.30592	1.84506e-160	3.60183e-160		K08237//hydroquinone glucosyltransferase [EC:2.4.1.218];K12938//anthocyanidin 5,3-O-glucosyltransferase [EC:2.4.1.-]+ko00942//Anthocyanin biosynthesis
101253789	2.22138	1.10225e-08	0.952188	8.93526e-05	Known_gene	54237341	54240862	NC_015442.2	0.42	0.65	0.4	1.16	0.71	0.98	0.07	0.18	0.19	0.64	0.8	0.59	0.952188	8.93526e-05	0.000396792	2.22138	1.10225e-08	7.99252e-08		K11592//endoribonuclease Dicer [EC:3.1.26.-]
101253781	2.14205	5.9917e-55	0.187114	0.0618301	Known_gene	3442956	3445261	NC_015442.2	0.25	1.63	0.21	0.72	0.31	1.34	0.71	0.28	1.34	3.81	2.52	3.84	0.187114	0.0618301	0.339721	2.14205	5.9917e-55	2.30832e-54		K12127//pseudo-response regulator 1+ko04712//Circadian rhythm - plant;K12135//zinc finger protein CONSTANS+ko04712//Circadian rhythm - plant;K12127//pseudo-response regulator 1+ko04712//Circadian rhythm - plant;K12135//zinc finger protein CONSTANS+ko04712//Circadian rhythm - plant
101253769	4.19163	4.92993e-06	3.36265	0.00765004	Known_gene	69841745	69843427	NC_015440.2	0	0	0	0.06	0.06	0.03	0	0.03	0	0.25	0.13	0.16	3.36265	0.00765004	0.0382168	4.19163	4.92993e-06	3.89859e-05		K17535//serine/threonine-protein kinase TNNI3K [EC:2.7.11.1];K14510//serine/threonine-protein kinase CTR1 [EC:2.7.11.1]+ko04016//MAPK signaling pathway - plant+ko04075//Plant hormone signal transduction;K04424//sterile alpha motif and leucine zipper containing kinase AZK [EC:2.7.11.25]
101253695	3.67706	3.13758e-26	0.994921	1.01245e-06	Known_gene	41738134	41739023	NC_015443.2	0.75	1.04	0.72	0.79	1.68	2.62	0.24	0.08	0.08	1.98	1.56	1.66	0.994921	1.01245e-06	4.16864e-06	3.67706	3.13758e-26	1.67265e-25		K03350//anaphase-promoting complex subunit 3+ko04120//Ubiquitin mediated proteolysis
101253650	2.57416	0	0.311073	1.19751e-10	Known_gene	5882563	5898061	NC_015448.2	3.39	4.17	3.61	4.99	2.99	5.62	3.55	4.01	3.9	4.31	54.45	4.62	0.311073	1.19751e-10	4.42285e-10	2.57416	0	0	GO:0006402//mRNA catabolic process;GO:0034641//cellular nitrogen compound metabolic process;GO:0009892//negative regulation of metabolic process;GO:0034660//ncRNA metabolic process;GO:0044260//cellular macromolecule metabolic process;GO:0010629//negative regulation of gene expression;GO:0009987//cellular process;GO:0060255//regulation of macromolecule metabolic process;GO:0006139//nucleobase-cont…	K18758//DIS3-like exonuclease 2 [EC:3.1.13.-];K18758//DIS3-like exonuclease 2 [EC:3.1.13.-];K18758//DIS3-like exonuclease 2 [EC:3.1.13.-];K18758//DIS3-like exonuclease 2 [EC:3.1.13.-]
101253642	2.37427	1.47644e-73	0.192364	0.0106232	Known_gene	53711051	53712684	NC_015439.2	2.34	2.73	3.11	2.49	3.31	3.64	0.88	0.69	0.84	4.91	3.49	4.11	0.192364	0.0106232	0.0537679	2.37427	1.47644e-73	4.86793e-73
101253576	2.5743	0.000791431			Known_gene	21	1549	NW_004195807.1	0	0	0	0.02	0	0	0.05	0	0	0	0.29	0				2.5743	0.000791431	0.0069453		K03469//ribonuclease HI [EC:3.1.26.4]+ko03030//DNA replication;K17541//SCY1-like protein 2
101253566	2.16794	0	0.844092	1.24085e-177	Known_gene	51994702	51999843	NC_015440.2	13.05	21.27	19.11	31.27	21.47	44.4	12.65	12.58	13.42	54.2	55.37	66.81	0.844092	1.24085e-177	1.22557e-177	2.16794	0	0	GO:1901360//organic cyclic compound metabolic process;GO:0034641//cellular nitrogen compound metabolic process;GO:0008152//metabolic process;GO:0031326//regulation of cellular biosynthetic process;GO:0018130//heterocycle biosynthetic process;GO:0065007//biological regulation;GO:2001141//regulation of RNA biosynthetic process;GO:0006725//cellular aromatic compound metabolic process;GO:0009058//bio…	K12581//CCR4-NOT transcription complex subunit 7/8+ko03018//RNA degradation;K13126//polyadenylate-binding protein+ko03015//mRNA surveillance pathway+ko03018//RNA degradation+ko03013//RNA transport;K01054//acylglycerol lipase [EC:3.1.1.23]+ko01100//Metabolic pathways+ko00561//Glycerolipid metabolism;K05941//glutathione gamma-glutamylcysteinyltransferase [EC:2.3.2.15];K13126//polyadenylate-binding …
101253421	5.89207	5.59602e-09	2.04072	0.00902587	Known_gene	61380483	61383874	NC_015446.2	0.02	0	0	0.04	0.04	0	0	0	0	0.1	0.14	0.07	2.04072	0.00902587	0.0454423	5.89207	5.59602e-09	4.02787e-08		K04733//interleukin-1 receptor-associated kinase 4 [EC:2.7.11.1]
101253388	5.30015	8.47755e-20	0.885882	2.32443e-08	Known_gene	41744053	41744915	NC_015443.2	1.55	0.87	2.11	1.51	2.44	4.67	0.08	0	0	1.09	0.78	1.54	0.885882	2.32443e-08	9.10079e-08	5.30015	8.47755e-20	4.94553e-19		K03350//anaphase-promoting complex subunit 3+ko04120//Ubiquitin mediated proteolysis
101253372	2.48581	1.23073e-32	0.84808	7.23225e-06	Known_gene	2424815	2425648	NC_015441.2	0.81	1.64	0.77	2.2	1.5	2.08	0.6	0.42	0.81	2.53	5.83	1.66	0.84808	7.23225e-06	3.07186e-05	2.48581	1.23073e-32	6.01824e-32		K14775//ribosome biogenesis protein UTP30
101253309	2.65106	0.000556402	1.50016	0.0114757	Known_gene	62142107	62145245	NC_015445.2	0.03	0.03	0.05	0.03	0.17	0.12	0	0	0.06	0.09	0.19	0.08	1.50016	0.0114757	0.0582529	2.65106	0.000556402	0.00484475		K06901//putative MFS transporter, AGZA family, xanthine/uracil permease;K05277//leucoanthocyanidin dioxygenase [EC:1.14.11.19]+ko01100//Metabolic pathways+ko01110//Biosynthesis of secondary metabolites+ko00941//Flavonoid biosynthesis;K05278//flavonol synthase [EC:1.14.11.23]+ko01100//Metabolic pathways+ko01110//Biosynthesis of secondary metabolites+ko00941//Flavonoid biosynthesis;K06901//putative…
101253295	3.19163	1.26026e-20	0.789046	3.2435e-33	Known_gene	38711484	38712993	NC_015443.2	4.3	6.37	5.78	2.28	8.74	18.06	0.05	0.07	0.17	0.75	0.74	1.13	0.789046	3.2435e-33	8.36477e-33	3.19163	1.26026e-20	7.26911e-20		K04733//interleukin-1 receptor-associated kinase 4 [EC:2.7.11.1]
101253254	2.22138	1.10225e-08	-0.374313	0.0727255	Known_gene	42037959	42041408	NC_015439.2	0.11	0.34	0.08	0.15	0.18	0.07	0.09	0.07	0.12	0.14	0.79	0.34	-0.374313	0.0727255	0.402904	2.22138	1.10225e-08	7.99252e-08		K08332//
101253233	6.45767	4.81124e-12			Known_gene	6699836	6700763	NC_015447.2	0	0	0	0	0	0	0	0	0	1.52	0.44	0.46				6.45767	4.81124e-12	3.21992e-11
101253205	2.26049	1.0941e-125	0.107839	0.102513	Known_gene	57452589	57456867	NC_015444.2	0.82	0.61	0.6	0.82	0.71	0.66	0.75	1.93	1.83	5.82	8.68	7.23	0.107839	0.102513	0.583715	2.26049	1.0941e-125	2.55554e-125		K12448//UDP-arabinose 4-epimerase [EC:5.1.3.5]+ko00520//Amino sugar and nucleotide sugar metabolism+ko01100//Metabolic pathways
101253191	4.27909	2.57299e-06	1.36265	0.00793234	Known_gene	62996695	63002951	NC_015442.2	0.02	0.02	0.08	0.1	0.16	0.04	0.02	0	0	0.09	0.05	0.31	1.36265	0.00793234	0.0396663	4.27909	2.57299e-06	2.01368e-05		K15015//solute carrier family 32 (vesicular inhibitory amino acid transporter);K14209//solute carrier family 36 (proton-coupled amino acid transporter)
101253135	2.06225	3.31637e-104	0.877439	8.3578e-17	Known_gene	2901704	2906156	NC_015447.2	2.78	4.04	3	6.12	5.08	7.75	2.8	3.53	2.57	5.48	24.93	6.47	0.877439	8.3578e-17	2.72949e-16	2.06225	3.31637e-104	8.8587e-104	GO:0031224//intrinsic component of membrane;GO:0016020//membrane;GO:0016021//integral component of membrane;GO:0044425//membrane part;
101253084	2.11363	4.16022e-11	-0.072932	0.133204	Known_gene	63519960	63526822	NC_015441.2	0.15	0.47	0.12	0.26	0.21	0.22	0.06	0.09	0.07	0.41	0.27	0.23	-0.072932	0.133204	0.775833	2.11363	4.16022e-11	2.84065e-10		K05387//glutamate receptor, ionotropic, plant;K05387//glutamate receptor, ionotropic, plant;K05387//glutamate receptor, ionotropic, plant
101253076	2.44871	2.56134e-13	0.542684	0.00246222	Known_gene	2494961	2498758	NC_015441.2	0.53	0.23	0.25	0.45	0.52	0.5	0.11	0.06	0.04	0.39	0.07	0.81	0.542684	0.00246222	0.0118366	2.44871	2.56134e-13	1.66976e-12		K11253//histone H3;K11253//histone H3;K11253//histone H3
101252936	2.25052	1.22377e-96	-0.676467	5.34392e-08	Known_gene	20275055	20279898	NC_015439.2	2.19	2.56	3.21	1.25	1.05	2.25	1.4	1.76	1.38	5.72	7.27	10.78	-0.676467	5.34392e-08	2.1161e-07	2.25052	1.22377e-96	3.43302e-96	GO:0016021//integral component of membrane;GO:0044425//membrane part;GO:0031224//intrinsic component of membrane;GO:0016020//membrane;
101252910	2.06227	8.24257e-221	-0.154675	0.0053731	Known_gene	61541478	61545989	NC_015445.2	3.54	5.89	3.99	4.12	2.25	5.05	2.12	1.97	3.48	11.06	7.01	10.83	-0.154675	0.0053731	0.0264771	2.06227	8.24257e-221	1.25833e-220	GO:0008152//metabolic process;GO:0050794//regulation of cellular process;GO:0071704//organic substance metabolic process;GO:0043170//macromolecule metabolic process;GO:0009987//cellular process;GO:0023052//signaling;GO:0050789//regulation of biological process;GO:0044267//cellular protein metabolic process;GO:0006468//protein phosphorylation;GO:0044237//cellular metabolic process;GO:1901564//orga…	K00924//;K00924//kinase [EC:2.7.1.-]
101252902	8.16891	5.52876e-58			Known_gene	63561656	63586412	NC_015444.2	0	0	0	0	0	0	0	0	0.01	0.03	3.69	0.07				8.16891	5.52876e-58	2.06987e-57		K04733//interleukin-1 receptor-associated kinase 4 [EC:2.7.11.1]
101252875	3.25052	3.53205e-07	-0.959275	0.0487136	Known_gene	3427089	3428837	NC_015442.2	0.08	0.08	0	0.06	0.02	0	0.04	0	0.02	0.02	0.48	0.05	-0.959275	0.0487136	0.263434	3.25052	3.53205e-07	2.68417e-06		K15397//3-ketoacyl-CoA synthase [EC:2.3.1.199]+ko01110//Biosynthesis of secondary metabolites+ko00062//Fatty acid elongation
101252831	3.0094	4.53152e-62	0.324728	0.0392315	Known_gene	64606012	64610527	NC_015447.2	0.14	0.41	0.11	0.14	0.56	0.13	0.06	0.18	0.33	0	4.44	0	0.324728	0.0392315	0.209449	3.0094	4.53152e-62	1.64092e-61
101252810	2.17274	3.41873e-12	0.631584	1.81189e-05	Known_gene	59892208	59893621	NC_015438.2	0.97	1.13	1.09	1.41	1.29	2.3	0.15	0.17	0.18	0.88	0.79	0.5	0.631584	1.81189e-05	7.81895e-05	2.17274	3.41873e-12	2.27967e-11		K04733//interleukin-1 receptor-associated kinase 4 [EC:2.7.11.1];K20000//maturase K;K01657//anthranilate synthase component I [EC:4.1.3.27]+ko01230//Biosynthesis of amino acids+ko01100//Metabolic pathways+ko01110//Biosynthesis of secondary metabolites+ko00400//Phenylalanine, tyrosine and tryptophan biosynthesis
101252776	2.72768	4.47238e-07	1.84808	0.0155425	Known_gene	66171996	66173618	NC_015441.2	0.02	0.02	0	0.02	0.06	0.07	0.04	0.06	0	0	0.64	0.06	1.84808	0.0155425	0.0797386	2.72768	4.47238e-07	3.4115e-06
101252760	4.09163	0	-0.739962	5.79965e-11	Known_gene	53361473	53362728	NC_015440.2	2.26	6.99	2.71	0.36	1.57	5.39	0.09	1.1	4.06	14.03	20.81	59.89	-0.739962	5.79965e-11	2.12688e-10	4.09163	0	0		K04733//interleukin-1 receptor-associated kinase 4 [EC:2.7.11.1]
101252730	3.13936	0	0.368629	5.52139e-05	Known_gene	33366757	33370488	NC_015447.2	1.83	2.64	1.68	2.15	1.99	3.81	0.97	1.31	2.02	8.22	12.05	18.64	0.368629	5.52139e-05	0.000243126	3.13936	0	0	GO:0005737//cytoplasm;GO:0005622//intracellular;GO:0016021//integral component of membrane;GO:0044425//membrane part;GO:0016020//membrane;GO:0044464//cell part;GO:0044424//intracellular part;GO:0031224//intrinsic component of membrane;GO:0005623//cell;	K22138//mitochondrial pyruvate carrier 1;K22138//mitochondrial pyruvate carrier 1;K22138//mitochondrial pyruvate carrier 1
101252712	2.44571	0	-0.518294	1.87268e-19	Known_gene	5772871	5774505	NC_015446.2	7.55	13.24	9.99	5.35	4.15	12.3	4.4	7.65	7.67	25.33	37.27	48.18	-0.518294	1.87268e-19	5.84547e-19	2.44571	0	0		K19747//BAHD acyltransferase [EC:2.3.1.-]
101252707	2.36387	0	0.975004	1.14633e-40	Known_gene	65302321	65314865	NC_015445.2	3.72	5.68	4.49	6.56	5.6	5.82	5.27	5.4	6.15	16.34	25.7	14.72	0.975004	1.14633e-40	2.71834e-40	2.36387	0	0		K21776//protein lin-54;K21596//calmodulin-binding transcription activator;K21776//protein lin-54;K21596//calmodulin-binding transcription activator;K21776//protein lin-54;K21776//protein lin-54
101252647	5.58395	1.50752e-76	0.408457	0.0437136	Known_gene	47481767	47485656	NC_015439.2	0.09	0.07	0.1	0.11	0.11	0.13	0.03	0.01	0.03	0.02	2.81	0	0.408457	0.0437136	0.234815	5.58395	1.50752e-76	4.83774e-76		K13420//LRR receptor-like serine/threonine-protein kinase FLS2 [EC:2.7.11.1]+ko04626//Plant-pathogen interaction+ko04016//MAPK signaling pathway - plant
101252642	2.05343	2.01829e-24	0.00183577	0.16581	Known_gene	63042965	63049410	NC_015447.2	1.74	1.55	1.35	1.53	1.56	1.59	0.54	0.41	0.36	1.47	2.33	1.62	0.00183577	0.16581	0.990222	2.05343	2.01829e-24	1.10301e-23	GO:0055114//oxidation-reduction process;GO:0008152//metabolic process;GO:0003824//catalytic activity;GO:0016491//oxidoreductase activity;	K09841//xanthoxin dehydrogenase [EC:1.1.1.288]+ko00906//Carotenoid biosynthesis+ko01100//Metabolic pathways+ko01110//Biosynthesis of secondary metabolites;K13070//momilactone-A synthase [EC:1.1.1.295]+ko00904//Diterpenoid biosynthesis+ko01110//Biosynthesis of secondary metabolites;K09841//xanthoxin dehydrogenase [EC:1.1.1.288]+ko00906//Carotenoid biosynthesis+ko01100//Metabolic pathways+ko01110//…
101252615	2.06687	0	0.582694	2.54848e-35	Known_gene	61584409	61591424	NC_015445.2	6.39	7.63	7.6	11.92	8.53	11.91	4.23	3.81	4.17	13.15	17.47	21.85	0.582694	2.54848e-35	6.41189e-35	2.06687	0	0		K09291//nucleoprotein TPR+ko03013//RNA transport;K20478//golgin subfamily B member 1
101252546	3.05564	1.72743e-143	0.7995	2.39976e-15	Known_gene	48411370	48414494	NC_015439.2	0.99	2.06	1.03	1.99	1.68	3.46	0.16	0.58	0.75	2.48	6.01	4.29	0.7995	2.39976e-15	8.03113e-15	3.05564	1.72743e-143	3.68518e-143		K12309//beta-galactosidase [EC:3.2.1.23]+ko00600//Sphingolipid metabolism+ko00604//Glycosphingolipid biosynthesis - ganglio series+ko00531//Glycosaminoglycan degradation+ko00511//Other glycan degradation+ko01100//Metabolic pathways+ko00052//Galactose metabolism;K14794//ribosomal RNA-processing protein 12;K14412//alpha-1,4-fucosyltransferase [EC:2.4.1.65]+ko01100//Metabolic pathways;K12309//beta-g…
101252469	2.65106	0.000556402	3.36265	0.00765004	Known_gene	53417998	53418976	NC_015440.2	0	0	0	0	0.12	0.08	0.08	0	0	0.08	0.13	0.33	3.36265	0.00765004	0.0382168	2.65106	0.000556402	0.00484475
101252467	2.99898	4.2957e-06	0.0407248	0.160781	Known_gene	10641462	10643593	NC_015440.2	0.07	0.05	0.05	0.02	0.09	0.07	0	0	0.05	0.07	0.29	0.05	0.0407248	0.160781	0.949668	2.99898	4.2957e-06	3.3877e-05		K14963//COMPASS component SWD3;K16794//platelet-activating factor acetylhydrolase IB subunit alpha+ko01100//Metabolic pathways+ko00565//Ether lipid metabolism;K03362//F-box and WD-40 domain protein 1/11+ko04120//Ubiquitin mediated proteolysis;K10260//F-box and WD-40 domain protein 7+ko04120//Ubiquitin mediated proteolysis
101252423	4.90917	6.77662e-09	4.04072	0.00108591	Known_gene	16079191	16085517	NC_015438.2	0	0	0	0	0.02	0.03	0	0	0.01	0.01	0.16	0	4.04072	0.00108591	0.00509514	4.90917	6.77662e-09	4.88606e-08		K05665//ATP-binding cassette, subfamily C (CFTR/MRP), member 1+ko02010//ABC transporters;K12447//UDP-sugar pyrophosphorylase [EC:2.7.7.64]+ko00520//Amino sugar and nucleotide sugar metabolism+ko00040//Pentose and glucuronate interconversions+ko01100//Metabolic pathways+ko00052//Galactose metabolism+ko00053//Ascorbate and aldarate metabolism;K01528//dynamin GTPase [EC:3.6.5.5]+ko04144//Endocytosis…
101252370	3.86551	7.98629e-08	1.62569	0.0263377	Known_gene	39138033	39139411	NC_015449.2	0	0.05	0	0.11	0.05	0	0.05	0	0	0.22	0.42	0.1	1.62569	0.0263377	0.138053	3.86551	7.98629e-08	5.93686e-07		K15710//E3 ubiquitin-protein ligase SHPRH [EC:3.6.4.- 2.3.2.27]
101252363	2.26145	6.86058e-69	0.876839	3.54541e-10	Known_gene	5699824	5702878	NC_015440.2	1.83	1.17	1.58	2.7	2.23	3.58	1.22	1.24	1.39	5.82	5.35	7.75	0.876839	3.54541e-10	1.32661e-09	2.26145	6.86058e-69	2.34722e-68		K11253//histone H3;K07953//GTP-binding protein SAR1 [EC:3.6.5.-]+ko04141//Protein processing in endoplasmic reticulum
101252357	4.65106	5.73687e-05	1.30376	0.00247386	Known_gene	52279976	52281350	NC_015439.2	0.06	0.06	0.45	0.3	0.54	0.63	0	0	0	0	0.67	0.08	1.30376	0.00247386	0.0118946	4.65106	5.73687e-05	0.000474283		K09286//EREBP-like factor
101252356	2.21816	2.67566e-240	-0.416994	3.5521e-06	Known_gene	48393746	48395960	NC_015448.2	5.47	6.94	6.36	4.85	5.1	3.96	4.96	6	5.94	3.92	67.07	5.16	-0.416994	3.5521e-06	1.48969e-05	2.21816	2.67566e-240	3.82155e-240	GO:0015748//organophosphate ester transport;GO:0006810//transport;GO:0015711//organic anion transport;GO:0071702//organic substance transport;GO:0051234//establishment of localization;GO:0006820//anion transport;GO:0006869//lipid transport;GO:0006811//ion transport;GO:0010876//lipid localization;GO:0033036//macromolecule localization;GO:0051179//localization;GO:0015914//phospholipid transport;GO:…
101252342	2.48185	7.17181e-101	0.793287	4.9703e-10	Known_gene	54482023	54484355	NC_015439.2	0.73	1.02	1.02	2.08	0.86	1.9	0.46	0.82	0.88	3.08	4.83	4.29	0.793287	4.9703e-10	1.86579e-09	2.48185	7.17181e-101	1.95286e-100
101252180	2.25576	2.57442e-104			Known_gene	4526431	4532677	NC_015442.2	0	0	0.01	0	0	0	0.97	0.87	0.79	2.67	6.02	3.62				2.25576	2.57442e-104	6.86747e-104		K20178//vacuolar protein sorting-associated protein 8;K10393//kinesin family member 2/24;K20661//cytochrome P450 family 714 subfamily A polypeptide 1;K12598//ATP-dependent RNA helicase DOB1 [EC:3.6.4.13]+ko03018//RNA degradation
101252155	4.51356	0.000110664			Known_gene	10652908	10655715	NC_015440.2	0	0	0	0.02	0	0	0	0	0	0.05	0.08	0.17				4.51356	0.000110664	0.000927321		K15255//ATP-dependent DNA helicase PIF1 [EC:3.6.4.12]
101252051	7.73079	7.15565e-24			Known_gene	52293115	52294049	NC_015439.2	0	0	0	0	0	0	0	0	0	0	3.8	0.16				7.73079	7.15565e-24	3.94026e-23		K09286//EREBP-like factor
101251970	3.19163	0.000954873			Known_gene	608	1918	NW_004196955.1	0	0	0	0	0	0	0.03	0	0	0.03	0.24	0				3.19163	0.000954873	0.00844485		K00423//L-ascorbate oxidase [EC:1.10.3.3]+ko01100//Metabolic pathways+ko00053//Ascorbate and aldarate metabolism;K09487//heat shock protein 90kDa beta+ko04141//Protein processing in endoplasmic reticulum+ko04626//Plant-pathogen interaction;K06911//uncharacterized protein
101251936	4.71519	5.47485e-08	3.36265	0.00765004	Known_gene	84492594	84496054	NC_015438.2	0	0	0	0.02	0	0.04	0	0.01	0	0.08	0.24	0	3.36265	0.00765004	0.0382168	4.71519	5.47485e-08	4.04892e-07		K12447//UDP-sugar pyrophosphorylase [EC:2.7.7.64]+ko00520//Amino sugar and nucleotide sugar metabolism+ko00040//Pentose and glucuronate interconversions+ko01100//Metabolic pathways+ko00052//Galactose metabolism+ko00053//Ascorbate and aldarate metabolism;K01528//dynamin GTPase [EC:3.6.5.5]+ko04144//Endocytosis;K03549//KUP system potassium uptake protein
101251927	2.73865	3.16871e-118	0.725523	1.2383e-09	Known_gene	88797835	88802729	NC_015438.2	1.43	2.07	2.31	3.32	3.28	3.07	0.72	1.32	1.4	1.84	18.61	1.84	0.725523	1.2383e-09	4.69337e-09	2.73865	3.16871e-118	7.79171e-118
101251766	3.4187	3.95117e-23	-0.833744	0.0453159	Known_gene	63440170	63442879	NC_015440.2	0.05	0.11	0.13	0.11	0.06	0	0	0.08	0.23	0.9	1.1	1.36	-0.833744	0.0453159	0.2441	3.4187	3.95117e-23	2.19964e-22		K01213//galacturan 1,4-alpha-galacturonidase [EC:3.2.1.67]+ko00040//Pentose and glucuronate interconversions+ko01100//Metabolic pathways
101251748	4.77659	2.90194e-08	-0.959275	0.0771551	Known_gene	52296007	52296841	NC_015439.2	0	0.13	0.04	0	0.09	0	0	0	0.05	0	0.62	0.65	-0.959275	0.0771551	0.429081	4.77659	2.90194e-08	2.1311e-07		K09286//EREBP-like factor
101251726	2.47174	2.59404e-17	0.125614	0.124308	Known_gene	48142492	48155286	NC_015447.2	0.27	0.43	0.29	0.45	0.28	0.35	0.18	0.24	0.24	0.53	1.78	1.14	0.125614	0.124308	0.719644	2.47174	2.59404e-17	1.57331e-16
101251712	2.10417	1.77957e-25	-0.646488	2.43643e-05	Known_gene	317893	320923	NC_015438.2	3.53	1.75	2.8	1.94	1.83	1.42	0.43	1.16	0.64	2.62	2.91	4.52	-0.646488	2.43643e-05	0.000105536	2.10417	1.77957e-25	9.58088e-25		K10418//dynein light chain LC8-type
101251632	2.04752	8.63038e-290	0.227895	0.0155044	Known_gene	60448057	60451356	NC_015447.2	0.93	1.73	1.85	2.18	0.8	2.35	3.75	6.2	3.9	13.12	19.39	27.23	0.227895	0.0155044	0.0794794	2.04752	8.63038e-290	1.0727e-289		K12741//heterogeneous nuclear ribonucleoprotein A1/A3+ko03040//Spliceosome;K06236//collagen, type I, alpha+ko04933//AGE-RAGE signaling pathway in diabetic complications;K01940//argininosuccinate synthase [EC:6.3.4.5]+ko00250//Alanine, aspartate and glutamate metabolism+ko00220//Arginine biosynthesis+ko01230//Biosynthesis of amino acids+ko01100//Metabolic pathways+ko01110//Biosynthesis of secondar…
101251629	2.40482	5.98007e-11	0.693188	1.32461e-05	Known_gene	3664494	3672949	NC_015447.2	1.8	0.77	0.47	1.06	2.17	1.68	0.26	0	0	0.46	0.23	1.4	0.693188	1.32461e-05	5.68159e-05	2.40482	5.98007e-11	4.09596e-10		K08695//anthocyanidin reductase [EC:1.3.1.77]+ko01110//Biosynthesis of secondary metabolites+ko00941//Flavonoid biosynthesis;K21102//anthocyanidin reductase [(2S)-flavan-3-ol-forming] [EC:1.3.1.112];K08695//anthocyanidin reductase [EC:1.3.1.77]+ko01110//Biosynthesis of secondary metabolites+ko00941//Flavonoid biosynthesis
101251621	4.51356	0.000110664	3.62569	0.00396452	Known_gene	68072599	68075282	NC_015446.2	0	0	0	0.04	0.04	0.16	0	0	0	0	0.33	0.1	3.62569	0.00396452	0.0193431	4.51356	0.000110664	0.000927321
101251617	4.19163	0.000419996	2.62569	0.0087471	Known_gene	64828651	64830745	NC_015446.2	0	0.02	0	0.02	0.04	0.06	0	0	0	0.02	0.13	0.03	2.62569	0.0087471	0.0439835	4.19163	0.000419996	0.00363028	GO:0006811//ion transport;GO:0006820//anion transport;GO:0051234//establishment of localization;GO:0055085//transmembrane transport;GO:0006810//transport;GO:0006817//phosphate ion transport;GO:0015698//inorganic anion transport;GO:0051179//localization;GO:0005886//plasma membrane;GO:0044459//plasma membrane part;GO:0044425//membrane part;GO:0005623//cell;GO:0016020//membrane;GO:0031226//intrinsic…	K08176//MFS transporter, PHS family, inorganic phosphate transporter
101251600	3.15846	1.13096e-34	0.915194	0.00090959	Known_gene	54672992	54675256	NC_015444.2	0.2	0.16	0.23	0.14	0.24	0.76	0.14	0.16	0.15	1.1	1.74	1.16	0.915194	0.00090959	0.0042496	3.15846	1.13096e-34	5.40036e-34		K04733//interleukin-1 receptor-associated kinase 4 [EC:2.7.11.1]
101251586	3.06536	1.66119e-09	0.764579	0.00201754	Known_gene	55078265	55083768	NC_015442.2	0.97	0.75	0.2	1.1	0.93	1.23	0	0.1	0.18	1.13	0.32	0.94	0.764579	0.00201754	0.00962234	3.06536	1.66119e-09	1.17865e-08
101251526	2.19163	0.000275109	0.412694	0.0677566	Known_gene	59788704	59790658	NC_015447.2	0.1	0.07	0.23	0.19	0.24	0.1	0.05	0.02	0.03	0.15	0.05	0.27	0.412694	0.0677566	0.373699	2.19163	0.000275109	0.00235329		K08869//aarF domain-containing kinase;K17613//calcineurin-binding protein cabin-1;K01179//endoglucanase [EC:3.2.1.4]+ko01100//Metabolic pathways+ko00500//Starch and sucrose metabolism;K11865//protein MYSM1;K12133//MYB-related transcription factor LHY+ko04712//Circadian rhythm - plant
101251453	4.60125	0	0.562071	3.62245e-07	Known_gene	53357961	53360267	NC_015440.2	1.26	1.83	0.96	0.43	1.19	4.49	0.08	0.48	0.68	6.09	6.97	18.68	0.562071	3.62245e-07	1.46929e-06	4.60125	0	0		K04733//interleukin-1 receptor-associated kinase 4 [EC:2.7.11.1]
101251415	2.13771	4.45053e-37			Known_gene	41134954	41135599	NC_015446.2	0.03	0	0	0	0	0	1.46	1.27	1.48	6.11	7.32	5.16				2.13771	4.45053e-37	2.068e-36	GO:1901363//heterocyclic compound binding;GO:0003677//DNA binding;GO:0043565//sequence-specific DNA binding;GO:0003676//nucleic acid binding;GO:0005488//binding;GO:0097159//organic cyclic compound binding;	K03627//putative transcription factor
101251414	3.06039	5.02774e-33			Known_gene	348381	353921	NC_015446.2	0	0	0	0	0	0	0.38	0.09	0.27	1.66	3.19	1.17				3.06039	5.02774e-33	2.44605e-32	GO:0048519//negative regulation of biological process;GO:0050794//regulation of cellular process;GO:0016043//cellular component organization;GO:0052543//callose deposition in cell wall;GO:0048869//cellular developmental process;GO:0050896//response to stimulus;GO:0009873//ethylene-activated signaling pathway;GO:0032502//developmental process;GO:1901421//positive regulation of response to alcohol;…	K14513//ethylene-insensitive protein 2+ko04016//MAPK signaling pathway - plant+ko04075//Plant hormone signal transduction
101251392	4.89207	1.57118e-05			Known_gene	48153506	48156030	NC_015443.2	0	0	0	0	0.02	0.05	0	0	0	0	0.24	0				4.89207	1.57118e-05	0.000126721		K05909//laccase [EC:1.10.3.2]
101251345	2.65106	0.000556402	0.455762	0.117537	Known_gene	60509100	60512329	NC_015447.2	0.02	0.03	0	0	0.03	0.03	0	0.03	0	0	0.2	0	0.455762	0.117537	0.677569	2.65106	0.000556402	0.00484475		K01102//pyruvate dehydrogenase phosphatase [EC:3.1.3.43]
101251309	2.09336	0	0.819543	2.31081e-175	Known_gene	51777524	51779480	NC_015445.2	15.56	27.88	21.3	9.83	35.03	71.66	8.41	11.01	14.12	49.56	45.28	48.44	0.819543	2.31081e-175	2.30586e-175	2.09336	0	0		K04733//interleukin-1 receptor-associated kinase 4 [EC:2.7.11.1]
101251287	2.0176	8.60855e-07			Known_gene	4511528	4513030	NC_015442.2	0	0	0	0.05	0	0.06	0.05	0.13	0.11	0.34	0.66	0.18				2.0176	8.60855e-07	6.62314e-06		K00423//L-ascorbate oxidase [EC:1.10.3.3]+ko01100//Metabolic pathways+ko00053//Ascorbate and aldarate metabolism;K05350//beta-glucosidase [EC:3.2.1.21]+ko01100//Metabolic pathways+ko00500//Starch and sucrose metabolism+ko01110//Biosynthesis of secondary metabolites+ko00460//Cyanoamino acid metabolism+ko00940//Phenylpropanoid biosynthesis
101251284	2.33487	0	0.256058	9.33343e-08	Known_gene	65846125	65850794	NC_015441.2	4.7	5.33	5.43	8.45	3.42	6.62	2.91	3.3	2.99	11.57	21	14.06	0.256058	9.33343e-08	3.72257e-07	2.33487	0	0
101251240	3.65106	0.000131291	1.36265	0.00793234	Known_gene	52927325	52928994	NC_015439.2	0.11	0.03	0.03	0.06	0.29	0.09	0	0.03	0	0.18	0.06	0.12	1.36265	0.00793234	0.0396663	3.65106	0.000131291	0.00110417		K16190//glucuronokinase [EC:2.7.1.43]+ko00520//Amino sugar and nucleotide sugar metabolism+ko00040//Pentose and glucuronate interconversions+ko01100//Metabolic pathways+ko00053//Ascorbate and aldarate metabolism;K13422//transcription factor MYC2+ko04016//MAPK signaling pathway - plant+ko04075//Plant hormone signal transduction
101251207	2.18236	0	0.789794	2.05375e-52	Known_gene	61622730	61627067	NC_015445.2	4.25	8.53	4.95	12.8	5.28	12.6	5.98	5.67	6.97	23.95	30.49	31.05	0.789794	2.05375e-52	4.36808e-52	2.18236	0	0		K19755//radial spoke head protein 1;K19530//junctophilin
101251193	4.77659	2.99229e-05			Known_gene	47185689	47187325	NC_015443.2	0	0	0	0	0	0	0	0	0	0	0.51	0				4.77659	2.99229e-05	0.000244329		K09326//homeobox protein OTX1;K18490//homeobox protein OTX2
101251137	4.3519	0.000223804	1.04072	0.096168	Known_gene	24624158	24625088	NC_015439.2	0.04	0	0	0	0.08	0	0	0	0	0.13	0.24	0.06	1.04072	0.096168	0.544095	4.3519	0.000223804	0.00190354		K09660//mannose-P-dolichol utilization defect 1;K01507//inorganic pyrophosphatase [EC:3.6.1.1]+ko00190//Oxidative phosphorylation
101251114	2.77659	2.46092e-07	-1.54424	0.0164147	Known_gene	64418634	64421417	NC_015445.2	0.02	0.1	0.06	0.02	0.02	0.02	0.02	0.02	0.06	0.06	0.27	0.42	-1.54424	0.0164147	0.0844573	2.77659	2.46092e-07	1.86189e-06		K03539//ribonuclease P/MRP protein subunit RPP1 [EC:3.1.26.5]+ko03013//RNA transport+ko03008//Ribosome biogenesis in eukaryotes
101251084	2.36051	4.20047e-97	-0.213592	0.0300635	Known_gene	58745381	58747463	NC_015441.2	0.93	2.14	0.69	0.32	0.81	2.16	0.48	0.82	1.72	1.86	10.46	2.79	-0.213592	0.0300635	0.158643	2.36051	4.20047e-97	1.1753e-96		K09286//EREBP-like factor
101251071	4.09852	9.46859e-06	0.818332	0.0419298	Known_gene	59438640	59442936	NC_015440.2	0	0.06	0.04	0.05	0.02	0.13	0	0	0.02	0.07	0.16	0.04	0.818332	0.0419298	0.224627	4.09852	9.46859e-06	7.56864e-05		K11446//histone demethylase JARID1 [EC:1.14.11.-]
101251043	3.73595	6.28584e-10	-0.0967787	0.149501	Known_gene	84195901	84198818	NC_015438.2	0.1	0.03	0.14	0.02	0.05	0.18	0	0	0.08	0.26	0.42	0.34	-0.0967787	0.149501	0.877906	3.73595	6.28584e-10	4.4118e-09		K09422//myb proto-oncogene protein, plant
101251019	2.32913	2.63933e-05	-0.473848	0.0622391	Known_gene	63396836	63398585	NC_015445.2	0.16	0.38	0.09	0.06	0.06	0.33	0.03	0.06	0.07	0.2	0.57	0	-0.473848	0.0622391	0.342071	2.32913	2.63933e-05	0.000214662		K20628//expansin
101250985	2.94652	4.13663e-07	0.8266	0.00257852	Known_gene	63443176	63444606	NC_015441.2	0.26	0.23	0.24	0.41	0.49	0.41	0.03	0.05	0.03	0.19	0.23	0.43	0.8266	0.00257852	0.0124134	2.94652	4.13663e-07	3.1509e-06		K09419//heat shock transcription factor, other eukaryote
101250976	3.1122	3.08811e-12			Known_gene	66985133	66987802	NC_015449.2	0	0	0	0	0	0	0.08	0.19	0	0.49	0.69	1.33				3.1122	3.08811e-12	2.05696e-11		K13944//
101250923	3.89916	0	-0.81669	1.26348e-47	Known_gene	62241260	62242594	NC_015446.2	7.21	23.44	14.18	2.62	6.5	16.85	1.33	1.82	2.22	5.72	64.53	7.66	-0.81669	1.26348e-47	2.80825e-47	3.89916	0	0
101250911	4.78564	2.50114e-67			Known_gene	51486993	51498963	NC_015445.2	0	0	0	0	0	0	0.06	0.06	0.05	1.36	1.21	1.94				4.78564	2.50114e-67	8.67887e-67		K10683//BRCA1-associated RING domain protein 1+ko03440//Homologous recombination;K17285//selenium-binding protein 1
101250900	2.13916	1.2413e-05	-0.181668	0.120307	Known_gene	49487536	49491674	NC_015443.2	0.07	0.16	0.02	0.06	0.04	0.13	0.02	0	0.06	0.08	0.27	0.02	-0.181668	0.120307	0.694593	2.13916	1.2413e-05	9.95118e-05		K15601//lysine-specific demethylase 3 [EC:1.14.11.-];K03021//DNA-directed RNA polymerase III subunit RPC2 [EC:2.7.7.6]+ko00230//Purine metabolism+ko03020//RNA polymerase+ko01100//Metabolic pathways+ko00240//Pyrimidine metabolism
101250895	5.58395	1.08914e-07			Known_gene	23566211	23566898	NC_015443.2	0	0	0	0	0.11	0	0	0	0	0	1.24	0				5.58395	1.08914e-07	8.13703e-07
101250873	3.31461	1.29977e-102	0.315585	0.0274641	Known_gene	63538202	63541439	NC_015449.2	0.44	0.48	0.39	0.45	0.47	0.71	0.08	0.34	0.57	2.63	4.52	6.7	0.315585	0.0274641	0.144269	3.31461	1.29977e-102	3.50693e-102	GO:0044237//cellular metabolic process;GO:0044238//primary metabolic process;GO:0050794//regulation of cellular process;GO:0007166//cell surface receptor signaling pathway;GO:0050896//response to stimulus;GO:0009987//cellular process;GO:0071704//organic substance metabolic process;GO:0006468//protein phosphorylation;GO:0023052//signaling;GO:0065007//biological regulation;GO:0019538//protein metab…	K04733//interleukin-1 receptor-associated kinase 4 [EC:2.7.11.1];K04733//interleukin-1 receptor-associated kinase 4 [EC:2.7.11.1]
101250849	4.19163	0.000419996			Known_gene	53819401	53821218	NC_015439.2	0	0	0	0	0.06	0.06	0	0	0	0.03	0.19	0.04				4.19163	0.000419996	0.00363028		K11267//sister chromatid cohesion protein PDS5
101250847	2.20808	1.73011e-58	-0.562616	0.00552415	Known_gene	55784684	55785486	NC_015447.2	0.97	0.94	1.52	0.22	0.98	1.18	1.65	1.32	1.98	11.07	5.13	6.37	-0.562616	0.00552415	0.0272609	2.20808	1.73011e-58	6.45574e-58		K14488//SAUR family protein+ko04075//Plant hormone signal transduction
101250843	2.59124	1.69644e-40	0.82622	2.7703e-09	Known_gene	95869522	95871011	NC_015438.2	2.38	1.49	1.41	2.17	3.96	3.29	0.88	0.38	0.41	3.24	2.45	4.84	0.82622	2.7703e-09	1.05959e-08	2.59124	1.69644e-40	7.58682e-40		K06624//cyclin-dependent kinase inhibitor 1B
101250821	4.36155	0.000214959	1.62569	0.0540263	Known_gene	64911512	64914106	NC_015444.2	0.02	0	0	0.02	0	0.03	0	0	0	0.05	0.11	0	1.62569	0.0540263	0.294318	4.36155	0.000214959	0.00182716
101250791	4.51356	3.7072e-07	0.692801	0.0294041	Known_gene	500286	507013	NC_015441.2	0.06	0.05	0.1	0.12	0.11	0.11	0	0.02	0	0.05	0.12	0.21	0.692801	0.0294041	0.154856	4.51356	3.7072e-07	2.82092e-06		K14638//solute carrier family 15 (peptide/histidine transporter), member 3/4
101250773	3.01266	1.7814e-21	0.882027	0.00295532	Known_gene	30084	32712	NC_015440.2	0.1	0.05	0.42	0.34	0.24	0.49	0.07	0.26	0.03	0.46	1.9	0.6	0.882027	0.00295532	0.0142704	3.01266	1.7814e-21	1.01523e-20		K01052//lysosomal acid lipase/cholesteryl ester hydrolase [EC:3.1.1.13]+ko04979//Cholesterol metabolism+ko00100//Steroid biosynthesis
101250769	2.95007	4.20491e-38	0.437615	0.0146781	Known_gene	35505833	35506898	NC_015439.2	0.28	1.21	0.87	0.87	0.8	1.57	0.16	0.51	0.55	3.43	2.24	4	0.437615	0.0146781	0.0751102	2.95007	4.20491e-38	1.93232e-37
101250701	3.77659	6.7797e-05			Known_gene	23417981	23421246	NC_015443.2	0	0.01	0	0	0	0	0	0.01	0	0.03	0.08	0.03				3.77659	6.7797e-05	0.000562812		K10406//kinesin family member C2/C3;K13420//LRR receptor-like serine/threonine-protein kinase FLS2 [EC:2.7.11.1]+ko04626//Plant-pathogen interaction+ko04016//MAPK signaling pathway - plant
101250679	2.76739	0	0.909515	5.02789e-117	Known_gene	64149840	64150719	NC_015440.2	27.63	28.53	22	16.15	51.37	81.89	37.25	30.63	28.56	227.67	181.71	263.22	0.909515	5.02789e-117	6.67339e-117	2.76739	0	0
101250659	2.24171	8.6199e-52	0.172973	0.0605626	Known_gene	45458488	45461401	NC_015439.2	0.55	0.67	0.65	0.58	0.65	0.9	0.49	0.49	0.42	0.96	4	1.17	0.172973	0.0605626	0.332107	2.24171	8.6199e-52	3.43151e-51
101250636	2.11028	0	0.377038	2.07156e-22	Known_gene	97179794	97182811	NC_015438.2	10.24	13.51	11.84	11.17	11.7	23.44	6.4	6.85	8.83	29.3	28.86	38.71	0.377038	2.07156e-22	6.14841e-22	2.11028	0	0	GO:0043231//intracellular membrane-bounded organelle;GO:0044464//cell part;GO:0005622//intracellular;GO:0043227//membrane-bounded organelle;GO:0043226//organelle;GO:0005634//nucleus;GO:0043229//intracellular organelle;GO:0044424//intracellular part;GO:0005623//cell;GO:1901363//heterocyclic compound binding;GO:0097159//organic cyclic compound binding;GO:0003700//DNA binding transcription factor ac…	K20557//transcription factor VIP1+ko04016//MAPK signaling pathway - plant;K20557//transcription factor VIP1+ko04016//MAPK signaling pathway - plant;K20557//transcription factor VIP1+ko04016//MAPK signaling pathway - plant
101250621	2.08471	2.12222e-05	0.526152	0.0392653	Known_gene	1151001	1153509	NC_015446.2	0.04	0.13	0.2	0.24	0.15	0.14	0.06	0.04	0.04	0.12	0.25	0.21	0.526152	0.0392653	0.20964	2.08471	2.12222e-05	0.00017189		K12309//beta-galactosidase [EC:3.2.1.23]+ko00600//Sphingolipid metabolism+ko00604//Glycosphingolipid biosynthesis - ganglio series+ko00531//Glycosaminoglycan degradation+ko00511//Other glycan degradation+ko01100//Metabolic pathways+ko00052//Galactose metabolism;K14794//ribosomal RNA-processing protein 12;K12309//beta-galactosidase [EC:3.2.1.23]+ko00600//Sphingolipid metabolism+ko00604//Glycosphin…
101250618	4.36155	1.34691e-06	1.04072	0.0208767	Known_gene	62387534	62388157	NC_015445.2	0.23	0.12	0.06	0	0.29	0.56	0	0	0.06	0.44	0.39	0.41	1.04072	0.0208767	0.108494	4.36155	1.34691e-06	1.04296e-05		K20777//exonuclease 3'-5' domain-containing protein 2 [EC:3.1.11.1]
101250609	3.06895	2.75264e-33	0.642965	0.000315612	Known_gene	48789916	48794904	NC_015443.2	0.44	0.43	0.24	0.61	0.67	0.48	0.03	0.13	0.17	0.32	1.97	0.24	0.642965	0.000315612	0.00143757	3.06895	2.75264e-33	1.33392e-32
101250597	2.30549	6.43254e-235	0.848571	6.55622e-27	Known_gene	65854088	65858775	NC_015441.2	2.77	4.41	3.68	7.51	4.36	7.61	3.12	2.94	3.04	7.49	27.66	8.68	0.848571	6.55622e-27	1.82223e-26	2.30549	6.43254e-235	9.34055e-235		K04505//presenilin 1 [EC:3.4.23.-];K14843//pescadillo;K00383//glutathione reductase (NADPH) [EC:1.8.1.7]+ko00480//Glutathione metabolism;K00028//malate dehydrogenase (decarboxylating) [EC:1.1.1.39]+ko01100//Metabolic pathways+ko00710//Carbon fixation in photosynthetic organisms+ko00620//Pyruvate metabolism+ko01200//Carbon metabolism;K18470//Rho GTPase-activating protein 1;K00383//glutathione redu…
101250427	2.36155	8.84279e-05			Known_gene	65808184	65811603	NC_015444.2	0	0	0	0	0	0	0.02	0.07	0	0.24	0.03	0.22				2.36155	8.84279e-05	0.000737191	GO:0050789//regulation of biological process;GO:0065007//biological regulation;GO:0032504//multicellular organism reproduction;GO:0048608//reproductive structure development;GO:0000003//reproduction;GO:0010431//seed maturation;GO:0010154//fruit development;GO:0048316//seed development;GO:0048731//system development;GO:0009966//regulation of signal transduction;GO:0061458//reproductive system deve…
101250310	2.38508	0	0.188602	1.6765e-05	Known_gene	47209977	47215113	NC_015443.2	7.6	9.66	8.43	7.63	7.86	12.52	2.96	2.79	3.56	8.44	24.72	11.46	0.188602	1.6765e-05	7.22455e-05	2.38508	0	0		K08332//;K08332//;K08332//
101250204	5.43956	3.66639e-07			Known_gene	70534694	70536758	NC_015440.2	0	0	0	0.02	0.02	0	0	0	0	0	0.38	0				5.43956	3.66639e-07	2.78873e-06		K08248//(R)-mandelonitrile lyase [EC:4.1.2.10]+ko01110//Biosynthesis of secondary metabolites+ko00460//Cyanoamino acid metabolism
101250181	2.17988	3.87768e-94	-0.644289	9.72697e-11	Known_gene	10541542	10544263	NC_015448.2	1.78	2.33	2.01	0.48	1.33	2.16	0.54	0.86	0.94	2.14	2.96	6.07	-0.644289	9.72697e-11	3.58425e-10	2.17988	3.87768e-94	1.10506e-93		K04730//interleukin-1 receptor-associated kinase 1 [EC:2.7.11.1];K04733//interleukin-1 receptor-associated kinase 4 [EC:2.7.11.1]
101250147	2.14065	1.72027e-19	0.98873	2.82105e-18	Known_gene	4389937	4393908	NC_015446.2	0.69	1.15	1.24	1.93	1.6	2.59	0.06	0.15	0.28	0.73	0.92	0.68	0.98873	2.82105e-18	8.97641e-18	2.14065	1.72027e-19	1.00889e-18		K04733//interleukin-1 receptor-associated kinase 4 [EC:2.7.11.1];K04730//interleukin-1 receptor-associated kinase 1 [EC:2.7.11.1];K04733//interleukin-1 receptor-associated kinase 4 [EC:2.7.11.1];K04730//interleukin-1 receptor-associated kinase 1 [EC:2.7.11.1]
101250112	2.88387	0	0.821158	2.7845e-53	Known_gene	64259631	64264376	NC_015441.2	5.75	11.19	6.6	12.79	7.2	16.97	8.83	7.54	8.54	40.43	48.92	85.38	0.821158	2.7845e-53	5.87636e-53	2.88387	0	0	GO:0006725//cellular aromatic compound metabolic process;GO:0071704//organic substance metabolic process;GO:0016070//RNA metabolic process;GO:0044238//primary metabolic process;GO:1901576//organic substance biosynthetic process;GO:0044271//cellular nitrogen compound biosynthetic process;GO:0010556//regulation of macromolecule biosynthetic process;GO:0009059//macromolecule biosynthetic process;GO:…
101250050	2.02036	1.69083e-56	0.959425	7.47614e-12	Known_gene	66770795	66776003	NC_015446.2	0.83	1.6	1.24	2.3	2.2	2.67	0.69	0.99	1.83	1.78	10.06	2.01	0.959425	7.47614e-12	2.68598e-11	2.02036	1.69083e-56	6.42819e-56		K00949//thiamine pyrophosphokinase [EC:2.7.6.2]+ko01100//Metabolic pathways+ko00730//Thiamine metabolism;K00949//thiamine pyrophosphokinase [EC:2.7.6.2]+ko01100//Metabolic pathways+ko00730//Thiamine metabolism
101250035	2.85945	2.95005e-221	0.541189	3.94844e-15	Known_gene	67311699	67316577	NC_015444.2	2.68	4.4	3.79	6.66	3.84	5.12	0.71	1.5	1	5.28	10.46	7.67	0.541189	3.94844e-15	1.32727e-14	2.85945	2.95005e-221	4.49445e-221	GO:0009737//response to abscisic acid;GO:0009725//response to hormone;GO:0009719//response to endogenous stimulus;GO:0014070//response to organic cyclic compound;GO:0033993//response to lipid;GO:0006970//response to osmotic stress;GO:1901700//response to oxygen-containing compound;GO:0006950//response to stress;GO:0009628//response to abiotic stimulus;GO:0009751//response to salicylic acid;GO:005…	K01148//poly(A)-specific ribonuclease [EC:3.1.13.4]+ko03018//RNA degradation;K01148//poly(A)-specific ribonuclease [EC:3.1.13.4]+ko03018//RNA degradation;K01148//poly(A)-specific ribonuclease [EC:3.1.13.4]+ko03018//RNA degradation;K01148//poly(A)-specific ribonuclease [EC:3.1.13.4]+ko03018//RNA degradation
101249962	2.16594	1.51861e-126	0.851486	1.76486e-23	Known_gene	90547696	90552371	NC_015438.2	1.55	2.28	1.39	3.45	2.63	3.32	0.88	1.11	1.25	3.46	6.3	4.9	0.851486	1.76486e-23	5.15273e-23	2.16594	1.51861e-126	3.53372e-126		K11666//INO80 complex subunit B;K11666//INO80 complex subunit B
101249949	4.19163	0.000419996			Known_gene	59059104	59060775	NC_015445.2	0	0	0	0	0	0	0	0	0	0	0.19	0				4.19163	0.000419996	0.00363028		K02882//large subunit ribosomal protein L18Ae+ko03010//Ribosome;K01381//saccharopepsin [EC:3.4.23.25];K19025//AP-5 complex subunit zeta-1
101249937	2.79968	5.90394e-34	0.278416	0.019243	Known_gene	57798132	57803622	NC_015444.2	0.61	0.74	1.25	1.1	1.22	0.86	0.16	0.35	0.1	0.88	1.97	1.59	0.278416	0.019243	0.0997343	2.79968	5.90394e-34	2.8384e-33
101249891	2.76259	1.03609e-69	0.654002	3.06779e-07	Known_gene	3467860	3470571	NC_015449.2	0.59	1.27	0.98	0.94	1.08	2.52	0.22	0.34	0.54	2.35	2.5	2.63	0.654002	3.06779e-07	1.24094e-06	2.76259	1.03609e-69	3.51957e-69	GO:0055085//transmembrane transport;GO:0051179//localization;GO:0006820//anion transport;GO:0051234//establishment of localization;GO:0006810//transport;GO:0006811//ion transport;GO:0016021//integral component of membrane;GO:0031224//intrinsic component of membrane;GO:0016020//membrane;GO:0044425//membrane part;GO:0022857//transmembrane transporter activity;GO:0005215//transporter activity;	K13783//MFS transporter, OPA family, solute carrier family 37 (glycerol-3-phosphate transporter), member 1/2
101249759	3.26583	3.39317e-148	0.947615	4.49087e-15	Known_gene	62169004	62180610	NC_015446.2	0.29	0.66	0.57	1.29	0.62	1.05	0.11	0.22	0.39	1.62	2.56	2.61	0.947615	4.49087e-15	1.51183e-14	3.26583	3.39317e-148	7.0684e-148	GO:0044425//membrane part;GO:0031224//intrinsic component of membrane;GO:0016021//integral component of membrane;GO:0016020//membrane;
101249629	2.93886	2.36285e-35	-0.268225	0.00471814	Known_gene	54941829	54962527	NC_015441.2	1.48	2.74	2.63	2.38	1.87	1.79	0.21	0.11	0.18	1.37	2.12	1.69	-0.268225	0.00471814	0.0231679	2.93886	2.36285e-35	1.12044e-34	GO:0044238//primary metabolic process;GO:0044267//cellular protein metabolic process;GO:0034641//cellular nitrogen compound metabolic process;GO:0019538//protein metabolic process;GO:0044237//cellular metabolic process;GO:0008152//metabolic process;GO:0044249//cellular biosynthetic process;GO:0009059//macromolecule biosynthetic process;GO:0010467//gene expression;GO:0044260//cellular macromolecul…	K02901//large subunit ribosomal protein L27e+ko03010//Ribosome;K02901//large subunit ribosomal protein L27e+ko03010//Ribosome;K02901//large subunit ribosomal protein L27e+ko03010//Ribosome
101249600	2.65106	0.000556402	0.57124	0.0648572	Known_gene	1754269	1755783	NC_015448.2	0.05	0.14	0.02	0.07	0.23	0	0	0	0.05	0	0.25	0.03	0.57124	0.0648572	0.35712	2.65106	0.000556402	0.00484475		K13080//flavanone 7-O-glucoside 2''-O-beta-L-rhamnosyltransferase [EC:2.4.1.236]+ko00941//Flavonoid biosynthesis+ko00944//Flavone and flavonol biosynthesis;K18823//soyasaponin III rhamnosyltransferase [EC:2.4.1.273]
101249596	3.05485	0	0.240092	0.000124435	Known_gene	52973538	52996667	NC_015439.2	3.56	3.87	4.42	3.69	2.9	5.48	2.63	2.5	2.81	13.02	28.41	25.97	0.240092	0.000124435	0.000556417	3.05485	0	0		K15193//protein SPT2;K00703//starch synthase [EC:2.4.1.21]+ko01100//Metabolic pathways+ko00500//Starch and sucrose metabolism+ko01110//Biosynthesis of secondary metabolites;K15193//protein SPT2;K15193//protein SPT2;K15193//protein SPT2;K15193//protein SPT2
101249565	2.58547	1.05083e-74	0.395074	0.00133647	Known_gene	477130	479992	NC_015445.2	0.78	0.89	1.15	0.21	0.9	2.71	0.61	0.57	0.31	2.5	2.7	4.05	0.395074	0.00133647	0.00630058	2.58547	1.05083e-74	3.42822e-74	GO:0008152//metabolic process;GO:0055114//oxidation-reduction process;GO:0046872//metal ion binding;GO:0005488//binding;GO:0046906//tetrapyrrole binding;GO:0097159//organic cyclic compound binding;GO:0004497//monooxygenase activity;GO:0016491//oxidoreductase activity;GO:0020037//heme binding;GO:0003824//catalytic activity;GO:0043169//cation binding;GO:0005506//iron ion binding;GO:0016705//oxidore…	K09843//(+)-abscisic acid 8'-hydroxylase [EC:1.14.13.93]+ko00906//Carotenoid biosynthesis
101249537	2.19878	4.54786e-232	0.890447	1.37447e-43	Known_gene	65511221	65514082	NC_015449.2	6.62	7.02	5.73	11.68	12.06	12.17	3.53	4.35	4.3	12.62	29.64	13.19	0.890447	1.37447e-43	3.16823e-43	2.19878	4.54786e-232	6.69095e-232	GO:0044249//cellular biosynthetic process;GO:0022607//cellular component assembly;GO:0044237//cellular metabolic process;GO:0006790//sulfur compound metabolic process;GO:0009987//cellular process;GO:0016226//iron-sulfur cluster assembly;GO:0051188//cofactor biosynthetic process;GO:0031163//metallo-sulfur cluster assembly;GO:0051186//cofactor metabolic process;GO:0071840//cellular component organi…	K03593//ATP-binding protein involved in chromosome partitioning
101249498	2.77659	2.72119e-05	0.303759	0.125564	Known_gene	95050835	95051819	NC_015438.2	0	0.16	0.04	0.04	0.2	0	0	0.12	0	0	0.79	0	0.303759	0.125564	0.727501	2.77659	2.72119e-05	0.000221474		K04733//interleukin-1 receptor-associated kinase 4 [EC:2.7.11.1]
101249481	2.59156	4.77389e-17	0.326634	0.0286248	Known_gene	3444306	3445829	NC_015446.2	0.37	1.11	0.46	0.88	0.59	0.97	0.13	0.27	0.09	0.79	1.14	1.08	0.326634	0.0286248	0.15061	2.59156	4.77389e-17	2.90751e-16		K13229//2,4-dihydroxy-1,4-benzoxazin-3-one-glucoside dioxygenase [EC:1.14.20.2]+ko00402//Benzoxazinoid biosynthesis;K06892//feruloyl-CoA ortho-hydroxylase [EC:1.14.11.-]+ko01110//Biosynthesis of secondary metabolites+ko00940//Phenylpropanoid biosynthesis
101249379	6.36155	1.88894e-11	-0.0263894	0.161172	Known_gene	946457	955787	NC_015444.2	0.05	0.1	0.1	0.06	0.09	0.1	0	0	0	0.01	0.41	0.05	-0.0263894	0.161172	0.952181	6.36155	1.88894e-11	1.28109e-10		K20456//oxysterol-binding protein 1
101249280	3.99898	0.000827378			Known_gene	6108729	6109619	NC_015444.2	0	0	0	0	0	0	0	0	0	0.04	0.27	0				3.99898	0.000827378	0.00727831		K13420//LRR receptor-like serine/threonine-protein kinase FLS2 [EC:2.7.11.1]+ko04626//Plant-pathogen interaction+ko04016//MAPK signaling pathway - plant
101249222	2.98566	2.05543e-250	0.207186	0.0407291	Known_gene	62138990	62140587	NC_015447.2	0.77	0.85	1.31	0.64	1.36	1.43	1.44	1.28	1.7	11.58	7.72	16.83	0.207186	0.0407291	0.217825	2.98566	2.05543e-250	2.84099e-250		K14491//two-component response regulator ARR-B family+ko04075//Plant hormone signal transduction
101249181	2.27369	0	0.972704	1.53932e-137	Known_gene	40853607	40870502	NC_015443.2	6.67	6.96	6.56	14.29	10.37	13.8	2.21	2.32	2.8	10.2	14.2	11.79	0.972704	1.53932e-137	1.8357e-137	2.27369	0	0		K12812//ATP-dependent RNA helicase UAP56/SUB2 [EC:3.6.4.13]+ko03040//Spliceosome+ko03015//mRNA surveillance pathway+ko03013//RNA transport;K04733//interleukin-1 receptor-associated kinase 4 [EC:2.7.11.1];K19307//25S rRNA (uracil2634-N3)-methyltransferase [EC:2.1.1.313];K18081//myotubularin-related protein 1/2 [EC:3.1.3.64 3.1.3.95]+ko01100//Metabolic pathways+ko04070//Phosphatidylinositol signali…
101249176	3.11495	9.04211e-21			Known_gene	63229667	63230833	NC_015442.2	0	0	0	0	0	0	0	0.3	0.09	1.5	0.45	1.56				3.11495	9.04211e-21	5.20513e-20		K13495//cis-zeatin O-glucosyltransferase [EC:2.4.1.215]+ko00908//Zeatin biosynthesis
101249175	2.78631	0	-0.00123851	0.164879	Known_gene	64086482	64087086	NC_015442.2	22.04	23.45	25.07	19.73	21.42	30.47	5.34	6.89	10.73	45.14	49.46	68.54	-0.00123851	0.164879	0.983441	2.78631	0	0		K13899//cystatin-C
101249151	3.76323	1.15476e-31	-1.73222	0.00428728	Known_gene	5743845	5745641	NC_015440.2	0	0.31	0.06	0	0	0.11	0.12	0.06	0.13	0	4.01	0	-1.73222	0.00428728	0.0209532	3.76323	1.15476e-31	5.72565e-31		K20254//perilipin-4;K20254//perilipin-4
101249132	3.19026	0	0.635176	1.90962e-45	Known_gene	51990864	51995954	NC_015439.2	7.04	9.61	3.78	11.42	7.54	12.09	2.03	1.51	1.42	10.49	21.94	12.21	0.635176	1.90962e-45	4.32619e-45	3.19026	0	0	GO:0023014//signal transduction by protein phosphorylation;GO:0031325//positive regulation of cellular metabolic process;GO:0006950//response to stress;GO:0006796//phosphate-containing compound metabolic process;GO:0031401//positive regulation of protein modification process;GO:0007346//regulation of mitotic cell cycle;GO:0032147//activation of protein kinase activity;GO:0048522//positive regulat…	K04421//mitogen-activated protein kinase kinase kinase 3 [EC:2.7.11.25];K04421//mitogen-activated protein kinase kinase kinase 3 [EC:2.7.11.25];K04421//mitogen-activated protein kinase kinase kinase 3 [EC:2.7.11.25]
101249119	3.67276	1.15281e-16	0.979324	0.00998283	Known_gene	618018	628985	NC_015446.2	0.07	0.04	0.05	0.11	0.07	0.14	0.04	0.04	0	0.28	0.52	0.22	0.979324	0.00998283	0.0504031	3.67276	1.15281e-16	7.06828e-16
101249036	2.99898	8.54529e-05			Known_gene	1679946	1686734	NC_015448.2	0	0	0	0	0	0	0	0.01	0.01	0.11	0	0				2.99898	8.54529e-05	0.000711902		K05681//ATP-binding cassette, subfamily G (WHITE), member 2+ko02010//ABC transporters;K05681//ATP-binding cassette, subfamily G (WHITE), member 2+ko02010//ABC transporters;K05681//ATP-binding cassette, subfamily G (WHITE), member 2+ko02010//ABC transporters;K05681//ATP-binding cassette, subfamily G (WHITE), member 2+ko02010//ABC transporters;K05681//ATP-binding cassette, subfamily G (WHITE), memb…
101249023	2.62903	2.48255e-83	0.653614	1.14962e-19	Known_gene	91433919	91440007	NC_015438.2	2.46	1.79	1.9	3.99	2.93	2.74	0.22	0.3	0.45	2	1.51	2.6	0.653614	1.14962e-19	3.57395e-19	2.62903	2.48255e-83	7.59141e-83		K04733//interleukin-1 receptor-associated kinase 4 [EC:2.7.11.1]
101248971	3.26257	1.48444e-202	0.758732	5.18083e-17	Known_gene	227167	230185	NC_015442.2	5.36	1.66	3.22	7.58	4.06	5.48	1.41	1.08	0.92	7.61	17.62	6.61	0.758732	5.18083e-17	1.68711e-16	3.26257	1.48444e-202	2.43986e-202
101248961	2.14126	1.33501e-26	-0.0703065	0.146665	Known_gene	66906377	66910760	NC_015440.2	0.22	0.03	0.12	0.15	0.03	0.17	0.29	0.24	0.17	0.2	2.62	0.21	-0.0703065	0.146665	0.860567	2.14126	1.33501e-26	7.07551e-26		K20553//5'-3' exoribonuclease 4 [EC:3.1.13.-]+ko04016//MAPK signaling pathway - plant;K10352//myosin heavy chain
101248828	2.08132	4.55578e-81	0.253803	0.00380385	Known_gene	51178430	51183740	NC_015439.2	1.86	2.44	1.9	2.15	2.61	2.65	0.95	1.42	1.08	1.89	8.78	4.03	0.253803	0.00380385	0.0184964	2.08132	4.55578e-81	1.4141e-80		K06889//uncharacterized protein
101248826	2.97761	4.24643e-168	-0.00924368	0.160097	Known_gene	62869492	62870791	NC_015447.2	2.36	1.83	1.97	2.11	2.33	1.69	0.21	1.64	1.86	0.82	25.96	1.36	-0.00924368	0.160097	0.945103	2.97761	4.24643e-168	8.05006e-168
101248795	2.1844	2.26986e-52	0.944509	4.46021e-14	Known_gene	55112784	55116945	NC_015444.2	0.53	0.83	0.6	1.56	0.9	1.31	0.24	0.36	0.5	1.84	1.45	1.64	0.944509	4.46021e-14	1.53204e-13	2.1844	2.26986e-52	8.98089e-52		K11000//callose synthase [EC:2.4.1.-];K15271//ATP-dependent DNA helicase HFM1/MER3 [EC:3.6.4.12]
101248792	2.42158	2.86758e-228	0.876495	7.27262e-49	Known_gene	62192506	62194984	NC_015444.2	5.7	8.74	7.39	11.13	10.04	17.42	2.33	3.09	3.55	12.8	13.65	19.08	0.876495	7.27262e-49	1.5988e-48	2.42158	2.86758e-228	4.26341e-228	GO:0016787//hydrolase activity;GO:0003824//catalytic activity;GO:0016791//phosphatase activity;GO:0004722//protein serine/threonine phosphatase activity;GO:0016788//hydrolase activity, acting on ester bonds;GO:0042578//phosphoric ester hydrolase activity;GO:0004721//phosphoprotein phosphatase activity;	K17506//protein phosphatase 1L [EC:3.1.3.16];K17506//protein phosphatase 1L [EC:3.1.3.16];K17506//protein phosphatase 1L [EC:3.1.3.16]
101248743	2.58274	3.82609e-139	0.976404	4.55563e-14	Known_gene	52718627	52720598	NC_015448.2	1.13	0.94	0.85	1.47	1.51	2.85	1.06	0.92	1.02	6.19	5.03	7.04	0.976404	4.55563e-14	1.56544e-13	2.58274	3.82609e-139	8.33465e-139		K10683//BRCA1-associated RING domain protein 1+ko03440//Homologous recombination;K11000//callose synthase [EC:2.4.1.-];K03798//cell division protease FtsH [EC:3.4.24.-];K17285//selenium-binding protein 1
101248706	2.32271	0	0.0452608	0.0437683	Known_gene	63675875	63679676	NC_015438.2	18.2	9.5	10.72	4.85	10.71	24.87	4.3	8.74	3.72	23.67	25.13	38.17	0.0452608	0.0437683	0.235246	2.32271	0	0		K06573//solute carrier family 4 (anion exchanger), member 1;K13862//solute carrier family 4 (sodium borate transporter), member 11;K06573//solute carrier family 4 (anion exchanger), member 1;K13862//solute carrier family 4 (sodium borate transporter), member 11;K06573//solute carrier family 4 (anion exchanger), member 1;K13862//solute carrier family 4 (sodium borate transporter), member 11
101248673	2.76965	0	0.961183	2.21632e-204	Known_gene	208675	209956	NC_015442.2	18.73	34.33	28.08	26.75	48.83	84.96	7.92	9.27	15.48	75.76	74.07	72.48	0.961183	2.21632e-204	1.98305e-204	2.76965	0	0
101248659	4.27909	2.57299e-06	1.36265	0.0437136	Known_gene	64756119	64758694	NC_015449.2	0	0.03	0	0.03	0.01	0.03	0	0.01	0	0.03	0.23	0.02	1.36265	0.0437136	0.23494	4.27909	2.57299e-06	2.01368e-05		K10591//E3 ubiquitin-protein ligase NEDD4 [EC:2.3.2.26]+ko04144//Endocytosis+ko04120//Ubiquitin mediated proteolysis
101248587	2.57014	2.63114e-06	0.799717	0.020599	Known_gene	47628329	47631178	NC_015443.2	0.1	0.03	0.19	0.11	0.23	0.24	0.03	0.06	0	0.21	0.23	0.16	0.799717	0.020599	0.106966	2.57014	2.63114e-06	2.06027e-05		K02470//DNA gyrase subunit B [EC:5.99.1.3]
101248549	2.17111	0	0.918888	5.38398e-159	Known_gene	3439739	3442413	NC_015449.2	10.62	10.86	11.13	16.63	17.87	27.76	5.2	5.2	7.17	17.21	42.26	18.75	0.918888	5.38398e-159	5.76182e-159	2.17111	0	0		K17086//transmembrane 9 superfamily member 2/4
101248399	2.4757	4.06699e-199	0.12973	0.044733	Known_gene	34434611	34436512	NC_015443.2	1.56	2.63	2.36	2.63	1.68	2.9	1.8	1.46	2.47	5.91	16.83	9.11	0.12973	0.044733	0.240763	2.4757	4.06699e-199	6.79405e-199		K10666//E3 ubiquitin-protein ligase RNF5 [EC:2.3.2.27]+ko04141//Protein processing in endoplasmic reticulum
101248359	2.08729	3.60795e-78	0.687649	3.00193e-13	Known_gene	1755644	1758493	NC_015440.2	1.06	1.78	1.33	2.57	1.38	2.79	0.62	0.63	0.82	2.39	2.98	3.61	0.687649	3.00193e-13	1.04888e-12	2.08729	3.60795e-78	1.1453e-77
101248337	2.08454	7.66013e-145	0.651374	2.41889e-11	Known_gene	56666891	56669115	NC_015447.2	1.45	1.47	2.67	1.14	2	5.92	3.01	1	1.65	8.22	7.07	9.01	0.651374	2.41889e-11	8.80084e-11	2.08454	7.66013e-145	1.62227e-144		K14794//ribosomal RNA-processing protein 12
101248325	2.99898	1.03502e-18	0.755323	0.00186493	Known_gene	1272668	1275295	NC_015446.2	0.42	0.25	0.19	0.63	0.22	0.58	0.09	0.07	0.14	0.54	0.58	1.39	0.755323	0.00186493	0.00887501	2.99898	1.03502e-18	6.13658e-18		K04733//interleukin-1 receptor-associated kinase 4 [EC:2.7.11.1];K04733//interleukin-1 receptor-associated kinase 4 [EC:2.7.11.1];K04733//interleukin-1 receptor-associated kinase 4 [EC:2.7.11.1]
101248301	2.57906	2.2439e-34	-0.976763	5.8622e-08	Known_gene	63498355	63499764	NC_015442.2	1.22	1.66	1.14	0.58	1.08	0.36	0.15	0.65	0.19	2.31	1.05	2.74	-0.976763	5.8622e-08	2.32439e-07	2.57906	2.2439e-34	1.07449e-33		K13495//cis-zeatin O-glucosyltransferase [EC:2.4.1.215]+ko00908//Zeatin biosynthesis
101248243	2.11846	3.11787e-44	0.728587	3.0722e-11	Known_gene	95812757	95819916	NC_015438.2	2	1.88	2.1	3.58	2.88	1.92	0.79	0.86	0.52	2.35	3.27	3.41	0.728587	3.0722e-11	1.11981e-10	2.11846	3.11787e-44	1.33578e-43	GO:0016020//membrane;GO:0016021//integral component of membrane;GO:0044425//membrane part;GO:0031224//intrinsic component of membrane;GO:0003824//catalytic activity;GO:0016740//transferase activity;GO:0008146//sulfotransferase activity;GO:0016782//transferase activity, transferring sulfur-containing groups;
101248193	2.46012	1.92701e-48	0.830802	1.15289e-06	Known_gene	64197054	64200629	NC_015441.2	0.61	1.09	0.51	1.13	1.15	1.29	0.38	0.65	0.45	1.98	3.19	3.33	0.830802	1.15289e-06	4.75418e-06	2.46012	1.92701e-48	7.92764e-48		K13513//lysocardiolipin and lysophospholipid acyltransferase [EC:2.3.1.- 2.3.1.51]+ko01100//Metabolic pathways+ko01110//Biosynthesis of secondary metabolites+ko00564//Glycerophospholipid metabolism+ko00561//Glycerolipid metabolism
101248016	4.65106	5.73687e-05	3.62569	0.00396452	Known_gene	47302607	47304596	NC_015443.2	0	0	0	0.04	0.04	0.04	0	0	0	0.13	0.05	0.09	3.62569	0.00396452	0.0193431	4.65106	5.73687e-05	0.000474283		K19891//glucan endo-1,3-beta-glucosidase 1/2/3 [EC:3.2.1.39]+ko00500//Starch and sucrose metabolism
101248007	2.10521	6.77256e-22	0.944509	0.000557282	Known_gene	54536811	54541065	NC_015441.2	0.03	0.13	0.11	0.22	0.13	0.15	0.09	0.14	0.15	0.13	1.18	0.27	0.944509	0.000557282	0.00257282	2.10521	6.77256e-22	3.838e-21		K03283//heat shock 70kDa protein 1/8+ko03040//Spliceosome+ko04144//Endocytosis+ko04141//Protein processing in endoplasmic reticulum
101248001	4.51356	0.000110664			Known_gene	66109025	66115266	NC_015440.2	0	0	0	0.01	0	0.01	0	0	0	0.04	0.11	0				4.51356	0.000110664	0.000927321		K05391//cyclic nucleotide gated channel, other eukaryote+ko04626//Plant-pathogen interaction;K05391//cyclic nucleotide gated channel, other eukaryote+ko04626//Plant-pathogen interaction
101247949	2.14583	3.73347e-06	1.41924	0.00111134	Known_gene	62692163	62693560	NC_015445.2	0.08	0	0.18	0.24	0.32	0.14	0.05	0.1	0.06	0.08	0.71	0.15	1.41924	0.00111134	0.00521602	2.14583	3.73347e-06	2.93736e-05		K14431//transcription factor TGA+ko04075//Plant hormone signal transduction
101247929	2.0176	1.31425e-24	0.132941	0.0461784	Known_gene	42721766	42725248	NC_015443.2	1.68	1.32	0.99	1.37	1.75	1.24	0.23	0.36	0.15	0.93	1.4	0.64	0.132941	0.0461784	0.249102	2.0176	1.31425e-24	7.16207e-24		K04733//interleukin-1 receptor-associated kinase 4 [EC:2.7.11.1]
101247913	3.72644	8.89365e-05	4.04072	0.00108591	Known_gene	61415165	61419177	NC_015441.2	0	0	0	0.21	0	0	0	0	0.03	0.22	0.09	0.02	4.04072	0.00108591	0.00509514	3.72644	8.89365e-05	0.000741707		K17604//zinc finger SWIM domain-containing protein 3
101247810	2.31999	1.17977e-07	-0.0166669	0.16389	Known_gene	3028815	3032031	NC_015441.2	0.05	0.11	0.08	0.1	0.03	0.12	0.05	0	0.06	0.17	0.12	0.27	-0.0166669	0.16389	0.971145	2.31999	1.17977e-07	8.82268e-07		K13457//disease resistance protein RPM1+ko04626//Plant-pathogen interaction
101247773	2.59619	0	0.754304	7.75432e-37	Known_gene	53953524	53955688	NC_015439.2	4.46	5.42	4.18	6.72	5.8	11.4	4.24	3.24	4.69	11.1	47.8	13.43	0.754304	7.75432e-37	1.92153e-36	2.59619	0	0		K10268//F-box and leucine-rich repeat protein 2/20;K10273//F-box and leucine-rich repeat protein 7
101247770	3.1517	1.33839e-128	0.791766	3.14714e-15	Known_gene	62070869	62073301	NC_015447.2	3.68	3.26	2.45	6.47	3.96	5.85	0.41	0.95	1.41	5.78	9.52	9.76	0.791766	3.14714e-15	1.05575e-14	3.1517	1.33839e-128	3.07972e-128	GO:0055114//oxidation-reduction process;GO:0008152//metabolic process;GO:0003824//catalytic activity;GO:0016491//oxidoreductase activity;	K10256//omega-6 fatty acid desaturase / acyl-lipid omega-6 desaturase (Delta-12 desaturase) [EC:1.14.19.6 1.14.19.22]+ko01212//Fatty acid metabolism+ko01040//Biosynthesis of unsaturated fatty acids;K00059//3-oxoacyl-[acyl-carrier protein] reductase [EC:1.1.1.100]+ko01100//Metabolic pathways+ko00061//Fatty acid biosynthesis+ko01212//Fatty acid metabolism+ko00780//Biotin metabolism+ko01040//Biosynt…
101247692	2.94652	4.13663e-07	-0.26413	0.10106	Known_gene	52831227	52832339	NC_015439.2	0.44	0.13	0.09	0.12	0.16	0.27	0.09	0.03	0	0.2	0.42	0.39	-0.26413	0.10106	0.573604	2.94652	4.13663e-07	3.1509e-06		K11649//SWI/SNF related-matrix-associated actin-dependent regulator of chromatin subfamily C;K08955//ATP-dependent metalloprotease [EC:3.4.24.-];K01889//phenylalanyl-tRNA synthetase alpha chain [EC:6.1.1.20]+ko00970//Aminoacyl-tRNA biosynthesis;K04079//molecular chaperone HtpG+ko04141//Protein processing in endoplasmic reticulum+ko04626//Plant-pathogen interaction
101247649	3.19163	0.000954873	1.26312	0.0348166	Known_gene	59319764	59325577	NC_015445.2	0	0.06	0	0.06	0.02	0.06	0	0	0.02	0.14	0.02	0	1.26312	0.0348166	0.185055	3.19163	0.000954873	0.00844485		K13065//shikimate O-hydroxycinnamoyltransferase [EC:2.3.1.133]+ko01100//Metabolic pathways+ko01110//Biosynthesis of secondary metabolites+ko00940//Phenylpropanoid biosynthesis+ko00941//Flavonoid biosynthesis+ko00945//Stilbenoid, diarylheptanoid and gingerol biosynthesis
101247647	2.79829	8.52168e-25	0.974582	8.89887e-17	Known_gene	61805255	61808433	NC_015445.2	1.34	4.5	1.09	2.83	4.48	6.31	0.13	0.23	0.38	1.35	2.46	1.27	0.974582	8.89887e-17	2.90767e-16	2.79829	8.52168e-25	4.63159e-24		K20628//expansin
101247631	4.65106	5.73687e-05	0.500156	0.0811206	Known_gene	62251274	62253519	NC_015444.2	0.02	0.03	0.07	0.06	0.06	0.05	0	0	0	0.02	0.1	0.08	0.500156	0.0811206	0.452737	4.65106	5.73687e-05	0.000474283		K02984//small subunit ribosomal protein S3Ae+ko03010//Ribosome;K20718//LRR receptor-like serine/threonine-protein kinase ERECTA [EC:2.7.11.1]+ko04016//MAPK signaling pathway - plant;K13420//LRR receptor-like serine/threonine-protein kinase FLS2 [EC:2.7.11.1]+ko04626//Plant-pathogen interaction+ko04016//MAPK signaling pathway - plant
101247623	2.21803	5.86363e-94	0.992958	5.92525e-21	Known_gene	46082460	46087936	NC_015443.2	0.85	1.17	0.92	2.54	1.62	1.58	0.62	0.67	0.76	2.56	3.06	4.03	0.992958	5.92525e-21	1.80017e-20	2.21803	5.86363e-94	1.67132e-93	GO:0051716//cellular response to stimulus;GO:0043170//macromolecule metabolic process;GO:0006793//phosphorus metabolic process;GO:0009987//cellular process;GO:0006468//protein phosphorylation;GO:0050794//regulation of cellular process;GO:0044237//cellular metabolic process;GO:0016310//phosphorylation;GO:0050789//regulation of biological process;GO:0044267//cellular protein metabolic process;GO:00…	K08286//protein-serine/threonine kinase [EC:2.7.11.-]
101247596	2.00614	1.87925e-240	-0.424699	5.10066e-16	Known_gene	59400701	59406514	NC_015440.2	6.66	2.89	4.1	2.16	2.29	5.88	0.87	2.77	1.28	3.7	8.52	8.16	-0.424699	5.10066e-16	1.6913e-15	2.00614	1.87925e-240	2.68212e-240	GO:0044042//glucan metabolic process;GO:0030244//cellulose biosynthetic process;GO:0016043//cellular component organization;GO:0016051//carbohydrate biosynthetic process;GO:0071554//cell wall organization or biogenesis;GO:0006073//cellular glucan metabolic process;GO:0030243//cellulose metabolic process;GO:1901576//organic substance biosynthetic process;GO:0009250//glucan biosynthetic process;GO:…	K20924//cellulose synthase-like protein [EC:2.4.1.-]
101247502	2.05311	2.05763e-32	0.97298	1.28052e-09	Known_gene	53824885	53828837	NC_015440.2	0.58	0.59	0.53	0.81	1.36	1.17	0.22	0.59	0.32	1.35	1.16	2.41	0.97298	1.28052e-09	4.85516e-09	2.05311	2.05763e-32	1.00883e-31		K19791//iron transport multicopper oxidase
101247497	2.08497	2.1422e-99	0.625687	9.9341e-13	Known_gene	4532262	4535301	NC_015449.2	2.02	3.81	2.91	4.36	2.97	5.87	1.09	1.54	2.3	3.5	9.13	6.93	0.625687	9.9341e-13	3.50924e-12	2.08497	2.1422e-99	5.9008e-99	GO:0009058//biosynthetic process;GO:0019748//secondary metabolic process;GO:0044550//secondary metabolite biosynthetic process;GO:0008152//metabolic process;GO:0016021//integral component of membrane;GO:0044425//membrane part;GO:0031224//intrinsic component of membrane;GO:0016020//membrane;GO:1901265//nucleoside phosphate binding;GO:0036094//small molecule binding;GO:0050660//flavin adenine dinuc…	K00480//salicylate hydroxylase [EC:1.14.13.1]+ko01100//Metabolic pathways;K09838//zeaxanthin epoxidase [EC:1.14.15.21]+ko00906//Carotenoid biosynthesis+ko01100//Metabolic pathways+ko01110//Biosynthesis of secondary metabolites;K18826//calmodulin-lysine N-methyltransferase [EC:2.1.1.60]+ko00310//Lysine degradation;K09838//zeaxanthin epoxidase [EC:1.14.15.21]+ko00906//Carotenoid biosynthesis+ko0110…
101247438	2.81841	3.06884e-55	-0.471725	0.00746398	Known_gene	38728928	38733507	NC_015443.2	0.39	0.55	1.11	0.54	0.35	0.44	0.04	0.3	0.8	1.19	2.95	3.8	-0.471725	0.00746398	0.0371847	2.81841	3.06884e-55	1.18022e-54		K00750//glycogenin [EC:2.4.1.186]+ko01100//Metabolic pathways+ko00500//Starch and sucrose metabolism;K00750//glycogenin [EC:2.4.1.186]+ko01100//Metabolic pathways+ko00500//Starch and sucrose metabolism;K00750//glycogenin [EC:2.4.1.186]+ko01100//Metabolic pathways+ko00500//Starch and sucrose metabolism
101247427	2.24633	0	0.611041	5.22169e-25	Known_gene	64110890	64120820	NC_015442.2	4.3	6.41	4.78	7.98	6.01	9.3	3.2	3.94	5.07	13.3	22.36	22.94	0.611041	5.22169e-25	1.48893e-24	2.24633	0	0	GO:0044271//cellular nitrogen compound biosynthetic process;GO:0031326//regulation of cellular biosynthetic process;GO:0006139//nucleobase-containing compound metabolic process;GO:0009058//biosynthetic process;GO:0010467//gene expression;GO:0019222//regulation of metabolic process;GO:0032774//RNA biosynthetic process;GO:0080090//regulation of primary metabolic process;GO:0043170//macromolecule me…	K14494//DELLA protein+ko04075//Plant hormone signal transduction;K14494//DELLA protein+ko04075//Plant hormone signal transduction
101247356	4.65106	1.03341e-07	-0.0927989	0.0971277	Known_gene	59331703	59333113	NC_015445.2	0.58	2.17	1.6	1.38	1.45	1.27	0	0.02	0	0.05	0.46	0.1	-0.0927989	0.0971277	0.549872	4.65106	1.03341e-07	7.71268e-07		K13065//shikimate O-hydroxycinnamoyltransferase [EC:2.3.1.133]+ko01100//Metabolic pathways+ko01110//Biosynthesis of secondary metabolites+ko00940//Phenylpropanoid biosynthesis+ko00941//Flavonoid biosynthesis+ko00945//Stilbenoid, diarylheptanoid and gingerol biosynthesis
101247287	5.56076	0	-0.48979	0.077251	Known_gene	34156957	34164629	NC_015439.2	0.05	0.04	0.2	0.11	0.05	0.07	0.26	0.21	0.25	11.4	9.1	14.87	-0.48979	0.077251	0.429781	5.56076	0	0	GO:0043167//ion binding;GO:0043169//cation binding;GO:0005488//binding;GO:0003824//catalytic activity;GO:0016491//oxidoreductase activity;GO:0046872//metal ion binding;	K04125//gibberellin 2-oxidase [EC:1.14.11.13]+ko00904//Diterpenoid biosynthesis+ko01110//Biosynthesis of secondary metabolites;K05278//flavonol synthase [EC:1.14.11.23]+ko01100//Metabolic pathways+ko01110//Biosynthesis of secondary metabolites+ko00941//Flavonoid biosynthesis;K05282//gibberellin 20-oxidase [EC:1.14.11.12]+ko00904//Diterpenoid biosynthesis+ko01100//Metabolic pathways+ko01110//Biosy…
101247199	3.36155	0.000493037	3.62569	0.00396452	Known_gene	70395076	70395794	NC_015440.2	0	0	0	0.13	0.07	0.21	0.07	0	0	0.07	0.52	0.09	3.62569	0.00396452	0.0193431	3.36155	0.000493037	0.00427847
101247183	2.41203	5.602e-275	0.35102	1.13709e-09	Known_gene	43049595	43051702	NC_015439.2	8.47	12.46	13.51	12.14	11.79	20.67	3.26	4.25	6.74	21.42	30.62	23.88	0.35102	1.13709e-09	4.30599e-09	2.41203	5.602e-275	7.22393e-275		K10666//E3 ubiquitin-protein ligase RNF5 [EC:2.3.2.27]+ko04141//Protein processing in endoplasmic reticulum
101247012	2.27094	0	0.804906	3.09791e-96	Known_gene	63259276	63260928	NC_015441.2	15.66	14.9	19.3	17.69	27.62	43.27	10.36	12.49	13.09	47.36	64.55	64.32	0.804906	3.09791e-96	4.66801e-96	2.27094	0	0	GO:0051252//regulation of RNA metabolic process;GO:0065007//biological regulation;GO:0050794//regulation of cellular process;GO:0019219//regulation of nucleobase-containing compound metabolic process;GO:0031326//regulation of cellular biosynthetic process;GO:0051171//regulation of nitrogen compound metabolic process;GO:0060255//regulation of macromolecule metabolic process;GO:1903506//regulation …	K13425//WRKY transcription factor 22+ko04626//Plant-pathogen interaction+ko04016//MAPK signaling pathway - plant
101246992	2.09285	1.40488e-17	0.467735	0.00393889	Known_gene	38611463	38614451	NC_015439.2	0.23	0.52	0.41	0.45	0.32	0.86	0.04	0.22	0.19	0.62	0.48	0.88	0.467735	0.00393889	0.0191801	2.09285	1.40488e-17	8.48215e-17		K04733//interleukin-1 receptor-associated kinase 4 [EC:2.7.11.1]
101246971	2.19163	0.000954837	-0.544238	0.0839678	Known_gene	96743776	96745327	NC_015438.2	0.11	0.06	0.32	0.11	0	0.24	0	0	0.18	0.06	0.56	0.16	-0.544238	0.0839678	0.469597	2.19163	0.000954837	0.00843613
101246927	2.61789	4.40951e-09	0.543225	0.0575107	Known_gene	47006435	47009062	NC_015442.2	0.11	0.09	0.07	0.02	0.23	0.15	0.05	0.11	0.02	0.41	0.41	0.32	0.543225	0.0575107	0.31428	2.61789	4.40951e-09	3.16632e-08		K16903//L-tryptophan---pyruvate aminotransferase [EC:2.6.1.99]+ko00380//Tryptophan metabolism+ko01100//Metabolic pathways
101246874	2.58395	1.53784e-05			Known_gene	96917433	96919292	NC_015438.2	0	0	0	0.15	0	0	0.07	0.07	0	0.16	0.29	0.52				2.58395	1.53784e-05	0.000123873
101246836	2.52686	1.09581e-277	-0.626198	1.00419e-51	Known_gene	1746974	1748994	NC_015444.2	11.07	24.13	16	2.55	8.02	23.09	0.86	2.62	3	12.02	8.68	17.37	-0.626198	1.00419e-51	2.1507e-51	2.52686	1.09581e-277	1.40343e-277	GO:0016020//membrane;GO:0031224//intrinsic component of membrane;GO:0016021//integral component of membrane;GO:0044425//membrane part;GO:1901363//heterocyclic compound binding;GO:0043169//cation binding;GO:0046872//metal ion binding;GO:0043167//ion binding;GO:0046914//transition metal ion binding;GO:0097159//organic cyclic compound binding;GO:0046906//tetrapyrrole binding;GO:0016491//oxidoreducta…	K20769//fatty acid omega-hydroxylase [EC:1.14.-.-]+ko00073//Cutin, suberine and wax biosynthesis;K13407//fatty acid omega-hydroxylase [EC:1.14.-.-]+ko00073//Cutin, suberine and wax biosynthesis;K20769//fatty acid omega-hydroxylase [EC:1.14.-.-]+ko00073//Cutin, suberine and wax biosynthesis
101246829	3.36155	1.00426e-07	0.915194	0.00220519	Known_gene	24216471	24217656	NC_015443.2	0.17	0.36	0.17	0.52	0.47	0.31	0	0	0.09	0.06	0.59	0.28	0.915194	0.00220519	0.0105525	3.36155	1.00426e-07	7.48889e-07
101246783	4.7428	0	0.24993	0.00496104	Known_gene	9597040	9598493	NC_015448.2	3.07	4.39	2.14	0.49	2.67	8.53	0.03	0.92	1.04	7.93	12.91	36.75	0.24993	0.00496104	0.0243906	4.7428	0	0		K00430//peroxidase [EC:1.11.1.7]+ko01100//Metabolic pathways+ko01110//Biosynthesis of secondary metabolites+ko00940//Phenylpropanoid biosynthesis
101246755	2.48709	2.67298e-18	0.500156	0.0530755	Known_gene	75805299	75807731	NC_015438.2	0.46	0.04	0.16	0.13	0.26	0.59	0.13	0.34	0.49	1.48	1.14	3.01	0.500156	0.0530755	0.288292	2.48709	2.67298e-18	1.59503e-17
101246727	2.03963	1.13626e-37	0.0695796	0.126346	Known_gene	46152807	46154087	NC_015443.2	1.05	0.94	1.03	0.4	0.84	2.01	0.78	1.02	0.89	0.95	7.99	2.02	0.0695796	0.126346	0.733074	2.03963	1.13626e-37	5.24331e-37
101246700	3.31716	3.00878e-21	0.863847	0.00049762	Known_gene	66351149	66355158	NC_015449.2	0.28	0.08	0.15	0.41	0.22	0.31	0.03	0.08	0.04	0.35	0.83	0.3	0.863847	0.00049762	0.00229122	3.31716	3.00878e-21	1.72096e-20	GO:0046323//glucose import;GO:0051179//localization;GO:0071702//organic substance transport;GO:0015758//glucose transport;GO:0008645//hexose transport;GO:0035428//hexose transmembrane transport;GO:0008643//carbohydrate transport;GO:0034219//carbohydrate transmembrane transport;GO:0015749//monosaccharide transport;GO:0051234//establishment of localization;GO:0006810//transport;GO:1905950//monosacc…	K08150//MFS transporter, SP family, solute carrier family 2 (myo-inositol transporter), member 13;K08150//MFS transporter, SP family, solute carrier family 2 (myo-inositol transporter), member 13
101246671	3.13023	1.23736e-06	1.62569	0.0039086	Known_gene	4231468	4249205	NC_015447.2	0	0	0.03	0.03	0.05	0.03	0.01	0	0.01	0.07	0.06	0.06	1.62569	0.0039086	0.0190294	3.13023	1.23736e-06	9.56978e-06		K11642//chromodomain-helicase-DNA-binding protein 3 [EC:3.6.4.12];K11643//chromodomain-helicase-DNA-binding protein 4 [EC:3.6.4.12]
101246595	4.89207	1.57118e-05	-0.696241	0.0894199	Known_gene	46013591	46016317	NC_015439.2	0	0.1	0	0.06	0	0	0	0	0	0.06	0.11	0.14	-0.696241	0.0894199	0.501835	4.89207	1.57118e-05	0.000126721		K04733//interleukin-1 receptor-associated kinase 4 [EC:2.7.11.1]
101246473	3.2846	1.27541e-25	0.588398	0.0492168	Known_gene	71433322	71436369	NC_015446.2	0	0.11	0.03	0.11	0.05	0.05	0	0.08	0.08	0.68	0.51	0.35	0.588398	0.0492168	0.266453	3.2846	1.27541e-25	6.85271e-25		K13457//disease resistance protein RPM1+ko04626//Plant-pathogen interaction
101246472	4.89207	1.57118e-05	0.84808	0.061701	Known_gene	84701867	84703789	NC_015438.2	0.07	0.02	0	0.02	0.09	0.05	0	0	0	0.07	0.07	0.21	0.84808	0.061701	0.338961	4.89207	1.57118e-05	0.000126721
101246451	4.36155	0.000214959	2.84808	0.00471791	Known_gene	65791647	65794047	NC_015444.2	0.05	0	0	0.19	0.15	0	0	0	0	0.1	0.16	0.27	2.84808	0.00471791	0.0231655	4.36155	0.000214959	0.00182716		K14537//nuclear GTP-binding protein+ko03008//Ribosome biogenesis in eukaryotes
101246439	4.19163	0.000419996	2.21065	0.00520561	Known_gene	44600211	44604611	NC_015443.2	0	0	0.03	0.05	0.03	0.06	0	0	0	0.02	0.12	0	2.21065	0.00520561	0.0256231	4.19163	0.000419996	0.00363028		K00654//serine palmitoyltransferase [EC:2.3.1.50]+ko00600//Sphingolipid metabolism+ko01100//Metabolic pathways
101246384	4.03591	0	0.841726	1.03441e-73	Known_gene	93766479	93769613	NC_015438.2	7.09	6.17	6.21	13.34	10.03	11.2	1.18	0.8	1.67	20.43	15.13	23.99	0.841726	1.03441e-73	1.82888e-73	4.03591	0	0	GO:0070647//protein modification by small protein conjugation or removal;GO:0044238//primary metabolic process;GO:0032446//protein modification by small protein conjugation;GO:0009987//cellular process;GO:1901564//organonitrogen compound metabolic process;GO:0043412//macromolecule modification;GO:0044267//cellular protein metabolic process;GO:0006464//cellular protein modification process;GO:0008…	K10523//speckle-type POZ protein;K03063//26S proteasome regulatory subunit T3+ko03050//Proteasome
101246356	2.10338	1.33806e-12			Known_gene	48904896	48908764	NC_015443.2	0.05	0	0	0	0	0	0.24	0.08	0.13	0.29	0.19	1.66				2.10338	1.33806e-12	8.83719e-12		K04733//interleukin-1 receptor-associated kinase 4 [EC:2.7.11.1];K04733//interleukin-1 receptor-associated kinase 4 [EC:2.7.11.1]
101246277	2.41798	0	0.845365	2.85266e-47	Known_gene	78704383	78708185	NC_015438.2	2.47	5.74	3.13	0.92	3.62	16.34	2.59	3.04	5.09	18.06	20.86	18.01	0.845365	2.85266e-47	6.35985e-47	2.41798	0	0
101246270	2.79706	6.54139e-38	0.625687	0.000249866	Known_gene	62795982	62797089	NC_015445.2	1.35	0.54	0.96	0.72	1.61	2.14	0.41	0.47	0.23	3.5	1.55	2.79	0.625687	0.000249866	0.00113227	2.79706	6.54139e-38	3.01111e-37		K14488//SAUR family protein+ko04075//Plant hormone signal transduction
101246188	2.70408	1.23477e-33	0.926266	1.1186e-05	Known_gene	93217449	93218662	NC_015438.2	0.37	0.86	0.74	1.52	0.79	1.48	0.34	0.51	0.32	2.23	2.9	2.64	0.926266	1.1186e-05	4.7884e-05	2.70408	1.23477e-33	5.95485e-33		K01054//acylglycerol lipase [EC:3.1.1.23]+ko01100//Metabolic pathways+ko00561//Glycerolipid metabolism;K13126//polyadenylate-binding protein+ko03015//mRNA surveillance pathway+ko03018//RNA degradation+ko03013//RNA transport;K05941//glutathione gamma-glutamylcysteinyltransferase [EC:2.3.2.15];K12581//CCR4-NOT transcription complex subunit 7/8+ko03018//RNA degradation
101246181	2.55188	2.02697e-26	-0.810705	0.00403052	Known_gene	71423849	71426639	NC_015446.2	0.13	0.28	0.16	0.14	0.11	0.08	0.19	0.12	0.09	0.94	0.73	0.61	-0.810705	0.00403052	0.0196762	2.55188	2.02697e-26	1.07743e-25		K13457//disease resistance protein RPM1+ko04626//Plant-pathogen interaction
101246149	3.95912	0	0.559809	2.11843e-20	Known_gene	44605671	44607514	NC_015443.2	12.12	8.6	25.76	23.69	22.32	23.93	1.4	5.78	8.98	25.28	192.15	26.47	0.559809	2.11843e-20	6.49431e-20	3.95912	0	0		K09539//DnaJ homolog subfamily C member 19
101246055	2.03939	1.3934e-141	0.169649	0.0133621	Known_gene	10767229	10772376	NC_015442.2	2.24	2.85	1.99	2.78	1.89	2.77	1.8	1.67	2.02	7.19	5.33	9.33	0.169649	0.0133621	0.0681889	2.03939	1.3934e-141	2.99856e-141	GO:0043226//organelle;GO:0005634//nucleus;GO:0044464//cell part;GO:0043227//membrane-bounded organelle;GO:0043231//intracellular membrane-bounded organelle;GO:0005623//cell;GO:0044424//intracellular part;GO:0005622//intracellular;GO:0043229//intracellular organelle;GO:1901363//heterocyclic compound binding;GO:0043167//ion binding;GO:0097159//organic cyclic compound binding;GO:0003676//nucleic aci…	K13415//protein brassinosteroid insensitive 1 [EC:2.7.10.1 2.7.11.1]+ko04075//Plant hormone signal transduction;K20641//Rho GTPase-activating protein 20;K13415//protein brassinosteroid insensitive 1 [EC:2.7.10.1 2.7.11.1]+ko04075//Plant hormone signal transduction;K20641//Rho GTPase-activating protein 20
101245998	2.68423	5.04803e-41	0.294481	0.0344121	Known_gene	59389310	59390263	NC_015447.2	0.81	0.93	1.09	0.7	1.19	1.64	0.37	0.62	0.63	2.15	3.81	4.87	0.294481	0.0344121	0.18283	2.68423	5.04803e-41	2.24189e-40		K14496//abscisic acid receptor PYR/PYL family+ko04016//MAPK signaling pathway - plant+ko04075//Plant hormone signal transduction
101245997	2.89207	0.000160361	0.265598	0.122998	Known_gene	96865330	96869661	NC_015438.2	0.04	0	0.16	0.09	0.15	0	0	0	0.06	0.21	0.19	0	0.265598	0.122998	0.711421	2.89207	0.000160361	0.00135364		K17604//zinc finger SWIM domain-containing protein 3
101245959	3.05413	5.40579e-17	0.662213	0.0361597	Known_gene	38810293	38813716	NC_015443.2	0.07	0.03	0.03	0.06	0.1	0.04	0.06	0.04	0.01	0.02	0.8	0.07	0.662213	0.0361597	0.192443	3.05413	5.40579e-17	3.29516e-16		K04733//interleukin-1 receptor-associated kinase 4 [EC:2.7.11.1]
101245892	3.36155	0.000493037	0.281733	0.110435	Known_gene	93160656	93161485	NC_015438.2	0.17	0.04	0.24	0.13	0.22	0.23	0	0	0.05	0.05	0.24	0.18	0.281733	0.110435	0.632982	3.36155	0.000493037	0.00427847		K00430//peroxidase [EC:1.11.1.7]+ko01100//Metabolic pathways+ko01110//Biosynthesis of secondary metabolites+ko00940//Phenylpropanoid biosynthesis
101245867	4.75844	3.12297e-60	3.36265	0.00765004	Known_gene	54592303	54594097	NC_015445.2	0	0	0	0.09	0	0.02	0	0.12	0.12	1.42	3.07	1.96	3.36265	0.00765004	0.0382168	4.75844	3.12297e-60	1.14801e-59		K09420//myb proto-oncogene protein;K09422//myb proto-oncogene protein, plant
101245839	2.0176	3.96885e-73	0.282926	0.00324322	Known_gene	58535823	58540169	NC_015441.2	1.88	2.14	1.97	2.74	1.87	2.36	1.37	1.18	1.37	2.15	10.26	2.63	0.282926	0.00324322	0.015707	2.0176	3.96885e-73	1.31287e-72	GO:0046467//membrane lipid biosynthetic process;GO:1901564//organonitrogen compound metabolic process;GO:0044249//cellular biosynthetic process;GO:0006807//nitrogen compound metabolic process;GO:0044237//cellular metabolic process;GO:0030148//sphingolipid biosynthetic process;GO:0009058//biosynthetic process;GO:0006629//lipid metabolic process;GO:0008610//lipid biosynthetic process;GO:0008152//me…	K07456//DNA mismatch repair protein MutS2+ko03430//Mismatch repair;K07456//DNA mismatch repair protein MutS2+ko03430//Mismatch repair;K07456//DNA mismatch repair protein MutS2+ko03430//Mismatch repair
101245817	2.0072	2.30378e-12	0.202476	0.0777621	Known_gene	35822619	35825323	NC_015439.2	0.24	0.4	0.51	0.33	0.14	0.88	0.06	0.2	0.25	0.52	0.6	0.98	0.202476	0.0777621	0.433052	2.0072	2.30378e-12	1.52952e-11
101245784	2.77659	2.72119e-05	0.555298	0.0774446	Known_gene	64607869	64610030	NC_015445.2	0.06	0.1	0.06	0.03	0.13	0.17	0.06	0	0.03	0.1	0.32	0.26	0.555298	0.0774446	0.431114	2.77659	2.72119e-05	0.000221474		K13425//WRKY transcription factor 22+ko04626//Plant-pathogen interaction+ko04016//MAPK signaling pathway - plant;K13426//WRKY transcription factor 29+ko04626//Plant-pathogen interaction+ko04016//MAPK signaling pathway - plant
101245762	4.68988	4.71746e-05			Known_gene	3421438	3423168	NC_015442.2	0	0	0	0	0	0	0	0	0	0.07	0.12	0.09				4.68988	4.71746e-05	0.000388418		K12447//UDP-sugar pyrophosphorylase [EC:2.7.7.64]+ko00520//Amino sugar and nucleotide sugar metabolism+ko00040//Pentose and glucuronate interconversions+ko01100//Metabolic pathways+ko00052//Galactose metabolism+ko00053//Ascorbate and aldarate metabolism;K03327//multidrug resistance protein, MATE family;K08237//hydroquinone glucosyltransferase [EC:2.4.1.218];K14833//nucleolar complex protein 2;K15…
101245759	4.58395	1.95501e-07	0.625687	0.110173	Known_gene	64916069	64920639	NC_015441.2	0	0.03	0	0	0.04	0	0	0	0.01	0.01	0.21	0.11	0.625687	0.110173	0.631238	4.58395	1.95501e-07	1.47305e-06		K12309//beta-galactosidase [EC:3.2.1.23]+ko00600//Sphingolipid metabolism+ko00604//Glycosphingolipid biosynthesis - ganglio series+ko00531//Glycosaminoglycan degradation+ko00511//Other glycan degradation+ko01100//Metabolic pathways+ko00052//Galactose metabolism
101245755	2.4002	4.5331e-187	0.903194	6.61259e-24	Known_gene	60824465	60831909	NC_015441.2	5.12	4.24	5.22	6.78	7.32	13.41	2.55	3.68	4.84	14.05	29.43	16.04	0.903194	6.61259e-24	1.91826e-23	2.4002	4.5331e-187	7.95287e-187	GO:0031224//intrinsic component of membrane;GO:0016020//membrane;GO:0016021//integral component of membrane;GO:0044425//membrane part;	K08505//protein transport protein SFT1+ko04130//SNARE interactions in vesicular transport;K08505//protein transport protein SFT1+ko04130//SNARE interactions in vesicular transport;K08505//protein transport protein SFT1+ko04130//SNARE interactions in vesicular transport
101245743	2.31019	2.12692e-65	0.439434	1.09801e-05	Known_gene	70419569	70422663	NC_015440.2	1.98	0.78	1.91	1.46	2.16	2.82	0.51	0.5	0.68	2.98	2.06	3.49	0.439434	1.09801e-05	4.69784e-05	2.31019	2.12692e-65	7.49488e-65		K01051//pectinesterase [EC:3.1.1.11]+ko00040//Pentose and glucuronate interconversions+ko01100//Metabolic pathways
101245668	2.32913	2.63933e-05	0.888722	0.00489287	Known_gene	1717961	1719679	NC_015444.2	0.1	0.03	0.5	0.16	0.43	0.63	0.03	0.1	0.04	0.14	0.48	0.23	0.888722	0.00489287	0.0240407	2.32913	2.63933e-05	0.000214662		K08235//xyloglucan:xyloglucosyl transferase [EC:2.4.1.207];K14504//xyloglucan:xyloglucosyl transferase TCH4 [EC:2.4.1.207]+ko04075//Plant hormone signal transduction
101245632	2.37543	1.87863e-60	0.502456	0.000939187	Known_gene	66256945	66257610	NC_015440.2	1.19	2.25	2.64	3.25	2.57	2.89	1.2	1.62	2.31	5.5	11.93	9.74	0.502456	0.000939187	0.00439123	2.37543	1.87863e-60	6.88931e-60		K09481//protein transport protein SEC61 subunit beta+ko04145//Phagosome+ko04141//Protein processing in endoplasmic reticulum+ko03060//Protein export
101245541	2.07443	1.97103e-70	0.826934	1.59322e-22	Known_gene	65753632	65754352	NC_015441.2	8.15	4.33	8.63	12.71	11.99	13.26	2.75	2.62	2.59	10.97	11.05	12.19	0.826934	1.59322e-22	4.72036e-22	2.07443	1.97103e-70	6.66084e-70		K19037//E3 ubiquitin-protein ligase ATL23 [EC:2.3.2.27]
101245451	2.58895	4.48867e-11	0.77769	0.0255189	Known_gene	19212009	19212893	NC_015441.2	0.22	0.18	0.13	0.48	0.22	0.19	0.16	0.18	0.14	0.81	1.15	0.99	0.77769	0.0255189	0.133525	2.58895	4.48867e-11	3.06702e-10		K01904//4-coumarate--CoA ligase [EC:6.2.1.12]+ko00130//Ubiquinone and other terpenoid-quinone biosynthesis+ko01100//Metabolic pathways+ko01110//Biosynthesis of secondary metabolites+ko00940//Phenylpropanoid biosynthesis+ko00360//Phenylalanine metabolism;K03006//DNA-directed RNA polymerase II subunit RPB1 [EC:2.7.7.6]+ko00230//Purine metabolism+ko03020//RNA polymerase+ko01100//Metabolic pathways+k…
101245389	2.6711	1.78937e-25	0.67544	0.0046319	Known_gene	62947590	62950074	NC_015445.2	0.16	0.28	0.3	0.61	0.26	0.32	0.08	0.22	0.23	0.95	1.18	1.3	0.67544	0.0046319	0.022719	2.6711	1.78937e-25	9.63454e-25		K20770//(+)-delta-cadinene 8-hydroxylase [EC:1.14.-.-];K00512//steroid 17alpha-monooxygenase / 17alpha-hydroxyprogesterone deacetylase [EC:1.14.14.19 1.14.14.32]+ko01100//Metabolic pathways;K13083//flavonoid 3',5'-hydroxylase [EC:1.14.13.88]+ko01110//Biosynthesis of secondary metabolites+ko00941//Flavonoid biosynthesis+ko00944//Flavone and flavonol biosynthesis
101245380	4.36155	0.000214959	0.625687	0.110173	Known_gene	67423365	67425837	NC_015444.2	0	0.03	0	0	0.03	0.02	0	0	0	0.03	0.1	0.02	0.625687	0.110173	0.631238	4.36155	0.000214959	0.00182716		K13148//integrator complex subunit 11 [EC:3.1.27.-];K19041//E3 ubiquitin-protein ligase RNF38/44 [EC:2.3.2.27]
101245349	2.42429	4.24822e-09	0.0115784	0.163424	Known_gene	4614408	4617013	NC_015441.2	0.17	0.69	0.54	0.51	0.48	0.42	0.06	0.14	0.09	0.24	0.67	0.71	0.0115784	0.163424	0.968151	2.42429	4.24822e-09	3.0494e-08		K13422//transcription factor MYC2+ko04016//MAPK signaling pathway - plant+ko04075//Plant hormone signal transduction;K04733//interleukin-1 receptor-associated kinase 4 [EC:2.7.11.1]
101245324	2.42867	4.44201e-07	-0.200283	0.0981668	Known_gene	52596054	52602814	NC_015448.2	0.21	0.26	0.34	0.31	0.21	0.18	0	0.08	0.07	0.38	0.16	0.26	-0.200283	0.0981668	0.556538	2.42867	4.44201e-07	3.38764e-06		K15015//solute carrier family 32 (vesicular inhibitory amino acid transporter);K14209//solute carrier family 36 (proton-coupled amino acid transporter)
101245190	2.48114	7.76776e-09	-0.106117	0.13348	Known_gene	64647967	64649350	NC_015445.2	0.17	0.87	0.29	0.26	0.48	0.5	0	0.09	0.32	0.46	1.45	0.24	-0.106117	0.13348	0.777696	2.48114	7.76776e-09	5.61034e-08		K03239//translation initiation factor eIF-2B subunit alpha+ko03013//RNA transport
101245157	2.48231	1.63787e-22	0.544616	0.000284514	Known_gene	63184659	63186197	NC_015441.2	0.6	1.9	0.95	1.5	1.72	1.81	0.26	0.2	0.36	0.33	3.73	0.36	0.544616	0.000284514	0.00129295	2.48231	1.63787e-22	9.20209e-22		K13051//beta-aspartyl-peptidase (threonine type) [EC:3.4.19.5]
101245150	2.07427	3.76598e-37	0.617605	1.83079e-06	Known_gene	713503	714140	NC_015441.2	2.39	3.63	4.01	2.9	3.96	8.92	0.52	1.92	2.24	9.22	4.75	5.51	0.617605	1.83079e-06	7.60751e-06	2.07427	3.76598e-37	1.74816e-36
101245140	3.03963	6.63452e-05	3.36265	0.00765004	Known_gene	32378931	32379911	NC_015440.2	0	0	0	0.04	0.11	0.04	0.04	0	0.04	0.37	0.11	0.1	3.36265	0.00765004	0.0382168	3.03963	6.63452e-05	0.000550142		K12447//UDP-sugar pyrophosphorylase [EC:2.7.7.64]+ko00520//Amino sugar and nucleotide sugar metabolism+ko00040//Pentose and glucuronate interconversions+ko01100//Metabolic pathways+ko00052//Galactose metabolism+ko00053//Ascorbate and aldarate metabolism;K20777//exonuclease 3'-5' domain-containing protein 2 [EC:3.1.11.1];K05387//glutamate receptor, ionotropic, plant;K08237//hydroquinone glucosyltr…
101245052	2.21972	6.65909e-49	0.630741	0.000187621	Known_gene	55064581	55067238	NC_015441.2	0.29	0.73	0.45	0.93	0.58	0.76	0.45	0.48	0.48	0.81	4.75	0.88	0.630741	0.000187621	0.000844732	2.21972	6.65909e-49	2.72746e-48		K06911//uncharacterized protein;K05350//beta-glucosidase [EC:3.2.1.21]+ko01100//Metabolic pathways+ko00500//Starch and sucrose metabolism+ko01110//Biosynthesis of secondary metabolites+ko00460//Cyanoamino acid metabolism+ko00940//Phenylpropanoid biosynthesis;K00423//L-ascorbate oxidase [EC:1.10.3.3]+ko01100//Metabolic pathways+ko00053//Ascorbate and aldarate metabolism;K10278//F-box and leucine-r…
101244901	2.30966	3.30187e-154	0.658005	6.5004e-08	Known_gene	66960917	66971963	NC_015446.2	0.83	0.86	0.93	1.6	1.38	1.22	1.14	1.11	1.14	5.83	5.78	5	0.658005	6.5004e-08	2.58137e-07	2.30966	3.30187e-154	6.62864e-154	GO:0022414//reproductive process;GO:0090307//mitotic spindle assembly;GO:0071822//protein complex subunit organization;GO:0009987//cellular process;GO:0070925//organelle assembly;GO:0009607//response to biotic stimulus;GO:0097435//supramolecular fiber organization;GO:0071840//cellular component organization or biogenesis;GO:0043207//response to external biotic stimulus;GO:0031122//cytoplasmic mic…	K16571//gamma-tubulin complex component 4;K16571//gamma-tubulin complex component 4;K16571//gamma-tubulin complex component 4;K16571//gamma-tubulin complex component 4
101244884	2.47549	2.64195e-138	-0.284676	1.27409e-05	Known_gene	48927267	48928929	NC_015443.2	5.2	6.56	7.19	3.79	4.49	7.49	1.18	1.65	1.18	7.98	6.56	8.04	-0.284676	1.27409e-05	5.46244e-05	2.47549	2.64195e-138	5.77567e-138
101244879	3.21354	5.41087e-78	0.668756	0.00142218	Known_gene	47438716	47441468	NC_015443.2	0.51	0.35	0.33	0.46	0.46	0.97	0.35	0.35	0.4	0.67	8.46	0.72	0.668756	0.00142218	0.0067187	3.21354	5.41087e-78	1.72042e-77	GO:0031323//regulation of cellular metabolic process;GO:0010468//regulation of gene expression;GO:0006355//regulation of transcription, DNA-templated;GO:0019219//regulation of nucleobase-containing compound metabolic process;GO:0050789//regulation of biological process;GO:0009889//regulation of biosynthetic process;GO:1903506//regulation of nucleic acid-templated transcription;GO:0050794//regulat…	K14491//two-component response regulator ARR-B family+ko04075//Plant hormone signal transduction
101244813	4.61789	7.90035e-13	1.12819	0.0116113	Known_gene	95679638	95680776	NC_015438.2	0.03	0.09	0.12	0.06	0.25	0.23	0.03	0	0.03	0.58	0.31	0.68	1.12819	0.0116113	0.0589698	4.61789	7.90035e-13	5.19529e-12
101244758	3.31326	2.56082e-48	0.983392	1.58241e-07	Known_gene	65887443	65889372	NC_015440.2	0.77	0.25	0.32	0.59	1.14	0.93	0.07	0.23	0.19	1.34	2.52	0.85	0.983392	1.58241e-07	6.35179e-07	3.31326	2.56082e-48	1.05484e-47		K15196//transcription factor IIIB 90 kDa subunit
101244748	2.35309	3.88137e-14	0.760617	0.000554522	Known_gene	5032206	5035177	NC_015440.2	0.12	0.36	0.27	0.63	0.19	0.44	0.12	0.01	0.16	0.28	0.89	0.26	0.760617	0.000554522	0.00255962	2.35309	3.88137e-14	2.49212e-13		K04733//interleukin-1 receptor-associated kinase 4 [EC:2.7.11.1];K12173//BRCA1-A complex subunit BRE+ko03440//Homologous recombination
101244728	4.09852	3.04985e-09	0.0407248	0.159722	Known_gene	52298404	52300691	NC_015439.2	0.09	0.28	0.22	0.23	0.14	0.24	0.05	0.05	0	0	1.34	0.26	0.0407248	0.159722	0.942624	4.09852	3.04985e-09	2.18115e-08		K13448//calcium-binding protein CML+ko04626//Plant-pathogen interaction
101244725	3.29261	1.32586e-85	0.68187	4.71725e-19	Known_gene	60900205	60902153	NC_015447.2	5.32	2.9	1.4	2.75	7.55	5.08	0.21	0.45	0.22	4.11	1.23	3.44	0.68187	4.71725e-19	1.48154e-18	3.29261	1.32586e-85	3.98434e-85		K13495//cis-zeatin O-glucosyltransferase [EC:2.4.1.215]+ko00908//Zeatin biosynthesis
101244681	4.32214	8.1805e-15	4.04072	0.00108591	Known_gene	23179012	23194337	NC_015444.2	0	0	0	0.04	0.02	0.01	0	0	0.03	0.1	0.38	0.01	4.04072	0.00108591	0.00509514	4.32214	8.1805e-15	5.19064e-14		K08247//methionine S-methyltransferase [EC:2.1.1.12]+ko00450//Selenocompound metabolism;K01191//alpha-mannosidase [EC:3.2.1.24]+ko00511//Other glycan degradation;K10357//myosin V;K01303//acylaminoacyl-peptidase [EC:3.4.19.1];K01537//Ca2+-transporting ATPase [EC:3.6.3.8]
101244678	6.80634	1.70062e-14	-0.281203	0.107429	Known_gene	48041366	48042298	NC_015443.2	0.26	0.23	0.07	0.15	0.08	0.24	0	0	0	0.04	1.99	0.05	-0.281203	0.107429	0.613657	6.80634	1.70062e-14	1.08523e-13		K12854//pre-mRNA-splicing helicase BRR2 [EC:3.6.4.13]+ko03040//Spliceosome
101244623	3.36155	0.000493037	-0.76663	0.0413909	Known_gene	51533688	51536579	NC_015447.2	0.16	0.48	0.45	0.32	0.32	0	0	0.08	0	0	0.18	0.79	-0.76663	0.0413909	0.221547	3.36155	0.000493037	0.00427847	GO:0006811//ion transport;GO:0051179//localization;GO:0006820//anion transport;GO:0015718//monocarboxylic acid transport;GO:0006810//transport;GO:0046942//carboxylic acid transport;GO:0006839//mitochondrial transport;GO:0015849//organic acid transport;GO:0051649//establishment of localization in cell;GO:0006850//mitochondrial pyruvate transmembrane transport;GO:0015711//organic anion transport;GO…
101244594	5.58395	1.08914e-07			Known_gene	42223474	42224301	NC_015443.2	0	0	0	0.09	0	0.05	0	0	0	0.41	0.29	0.36				5.58395	1.08914e-07	8.13703e-07		K12447//UDP-sugar pyrophosphorylase [EC:2.7.7.64]+ko00520//Amino sugar and nucleotide sugar metabolism+ko00040//Pentose and glucuronate interconversions+ko01100//Metabolic pathways+ko00052//Galactose metabolism+ko00053//Ascorbate and aldarate metabolism;K05387//glutamate receptor, ionotropic, plant;K20777//exonuclease 3'-5' domain-containing protein 2 [EC:3.1.11.1];K08237//hydroquinone glucosyltr…
101244476	2.23227	4.77575e-21	0.385373	0.00124108	Known_gene	61680748	61684565	NC_015440.2	1.16	1.06	1.38	1.59	1.7	1.44	0.31	0.1	0.29	0.23	2.69	0.24	0.385373	0.00124108	0.00583963	2.23227	4.77575e-21	2.73756e-20	GO:0015780//nucleotide-sugar transmembrane transport;GO:0071705//nitrogen compound transport;GO:1901264//carbohydrate derivative transport;GO:0051234//establishment of localization;GO:0006810//transport;GO:0051179//localization;GO:0015931//nucleobase-containing compound transport;GO:0071702//organic substance transport;GO:0012505//endomembrane system;GO:0044424//intracellular part;GO:0043229//int…	K15356//GDP-mannose transporter
101244438	4.51356	0.000110664	3.36265	0.00765004	Known_gene	47874765	47876606	NC_015439.2	0	0	0	0.03	0	0.11	0	0	0	0.03	0.17	0.11	3.36265	0.00765004	0.0382168	4.51356	0.000110664	0.000927321		K00430//peroxidase [EC:1.11.1.7]+ko01100//Metabolic pathways+ko01110//Biosynthesis of secondary metabolites+ko00940//Phenylpropanoid biosynthesis
101244394	2.38957	1.08671e-78	0.69677	1.86445e-08	Known_gene	66116052	66120231	NC_015444.2	0.43	0.68	0.88	1.23	0.79	1.23	0.49	0.34	0.41	2.2	1.97	2.4	0.69677	1.86445e-08	7.27368e-08	2.38957	1.08671e-78	3.43389e-78		K04733//interleukin-1 receptor-associated kinase 4 [EC:2.7.11.1]
101244319	3.78748	2.85782e-31	0.0407248	0.161172	Known_gene	86400167	86401130	NC_015438.2	0.23	0.11	0.16	0.17	0.27	0.06	0.16	0.39	0.06	0.46	7.63	0.24	0.0407248	0.161172	0.952248	3.78748	2.85782e-31	1.42305e-30		K12412//pheromone receptor transcription factor;K09260//MADS-box transcription enhancer factor 2A;K04454//MADS-box transcription enhancer factor 2C
101244313	2.29117	1.40733e-169	-0.386026	4.1702e-07	Known_gene	602168	604948	NC_015446.2	3.36	4.63	4.49	3.14	2.02	4.62	1.46	1.31	2.5	7.61	7.39	10.58	-0.386026	4.1702e-07	1.69547e-06	2.29117	1.40733e-169	2.65115e-169	GO:0031224//intrinsic component of membrane;GO:0016021//integral component of membrane;GO:0044425//membrane part;GO:0016020//membrane;	K15502//serine/threonine-protein phosphatase 6 regulatory ankyrin repeat subunit A;K15503//serine/threonine-protein phosphatase 6 regulatory ankyrin repeat subunit B;K15502//serine/threonine-protein phosphatase 6 regulatory ankyrin repeat subunit A
101244269	2.73136	5.67995e-28	0.455762	0.00755121	Known_gene	67061304	67065659	NC_015440.2	0.26	0.41	0.51	0.54	0.61	0.46	0.09	0.08	0.27	0.58	1.4	0.93	0.455762	0.00755121	0.0376255	2.73136	5.67995e-28	2.95654e-27		K14684//solute carrier family 25 (mitochondrial phosphate transporter), member 23/24/25/41
101244095	3.38601	1.08582e-214	0.575382	2.37487e-13	Known_gene	58217420	58219684	NC_015444.2	2.28	2.98	2.63	0.76	2.26	9.08	0.32	0.48	1.01	5.11	5.45	8.68	0.575382	2.37487e-13	8.27305e-13	3.38601	1.08582e-214	1.69754e-214		K02882//large subunit ribosomal protein L18Ae+ko03010//Ribosome;K01381//saccharopepsin [EC:3.4.23.25];K00924//
101244059	2.04578	8.0934e-08	0.330231	0.106769	Known_gene	5213912	5219041	NC_015449.2	0.06	0.03	0.17	0.03	0.12	0.19	0.03	0.06	0.31	0.78	0.46	0.33	0.330231	0.106769	0.609649	2.04578	8.0934e-08	6.01732e-07		K16573//gamma-tubulin complex component 6
101244049	2.93635	3.13989e-273	0.789917	4.55088e-06	Known_gene	53277407	53282044	NC_015439.2	0.61	0.5	0.24	0.65	0.54	0.97	1.38	1.04	0.88	8.26	6.98	10.24	0.789917	4.55088e-06	1.91782e-05	2.93635	3.13989e-273	4.06685e-273	GO:0009987//cellular process;GO:0010556//regulation of macromolecule biosynthetic process;GO:0050794//regulation of cellular process;GO:0010468//regulation of gene expression;GO:0009889//regulation of biosynthetic process;GO:0044271//cellular nitrogen compound biosynthetic process;GO:0019222//regulation of metabolic process;GO:0043170//macromolecule metabolic process;GO:0018130//heterocycle biosy…	K15601//lysine-specific demethylase 3 [EC:1.14.11.-];K15601//lysine-specific demethylase 3 [EC:1.14.11.-];K15601//lysine-specific demethylase 3 [EC:1.14.11.-]
101244008	2.65106	0.000556402	-1.76663	0.0181671	Known_gene	42237812	42239358	NC_015443.2	0.03	0.16	0	0	0.05	0	0	0.03	0.03	0.03	0.27	0.04	-1.76663	0.0181671	0.0939381	2.65106	0.000556402	0.00484475
101243893	2.86443	1.3625e-05	-1.95928	0.0328976	Known_gene	30733840	30736981	NC_015442.2	0.01	0.04	0	0	0	0.01	0	0.03	0.01	0	0.28	0	-1.95928	0.0328976	0.174421	2.86443	1.3625e-05	0.000109531		K07478//putative ATPase;K14638//solute carrier family 15 (peptide/histidine transporter), member 3/4;K03469//ribonuclease HI [EC:3.1.26.4]+ko03030//DNA replication;K13457//disease resistance protein RPM1+ko04626//Plant-pathogen interaction;K17541//SCY1-like protein 2
101243884	4.19163	0.000419996	0.0407248	0.164879	Known_gene	262768	264714	NC_015441.2	0	0.02	0	0.02	0	0	0	0	0	0	0.16	0.03	0.0407248	0.164879	0.984074	4.19163	0.000419996	0.00363028		K12153//phenylalanine N-monooxygenase [EC:1.14.13.124]+ko00966//Glucosinolate biosynthesis+ko01110//Biosynthesis of secondary metabolites+ko00460//Cyanoamino acid metabolism+ko01210//2-Oxocarboxylic acid metabolism
101243853	2.56835	6.13514e-27	0.624332	1.27294e-29	Known_gene	42360745	42362207	NC_015439.2	2.12	18	7.2	22.12	9.97	9.53	0.25	0.3	0.24	1.56	1.96	1.11	0.624332	1.27294e-29	3.42425e-29	2.56835	6.13514e-27	3.2354e-26		K00145//N-acetyl-gamma-glutamyl-phosphate reductase [EC:1.2.1.38]+ko00220//Arginine biosynthesis+ko01230//Biosynthesis of amino acids+ko01100//Metabolic pathways+ko01110//Biosynthesis of secondary metabolites+ko01210//2-Oxocarboxylic acid metabolism
101243808	3.13759	1.48443e-172	0.98292	2.01902e-25	Known_gene	63762926	63766808	NC_015445.2	1.57	3.2	1.39	4.2	3.6	4.34	0.62	0.63	1.03	5.09	8.55	6.52	0.98292	2.01902e-25	5.73211e-25	3.13759	1.48443e-172	2.75798e-172		K14411//RNA-binding protein Musashi+ko03015//mRNA surveillance pathway
101243796	3.77659	6.7797e-05			Known_gene	39120799	39121964	NC_015443.2	0	0	0	0	0.11	0	0	0.05	0	0.06	0.61	0.08				3.77659	6.7797e-05	0.000562812
101243792	3.36155	0.000493037	2.04072	0.00902587	Known_gene	37393191	37394792	NC_015443.2	0.07	0	0	0.07	0.19	0.04	0	0.04	0	0.24	0	0.16	2.04072	0.00902587	0.0454423	3.36155	0.000493037	0.00427847
101055527	2.40306	7.00641e-156	0.783878	3.99578e-35	Known_gene	63540074	63545355	NC_015440.2	3.96	4.75	4.99	9.35	4.93	9.45	0.83	1.34	2.08	4.83	10.29	7.49	0.783878	3.99578e-35	1.00818e-34	2.40306	7.00641e-156	1.39714e-155		K13412//calcium-dependent protein kinase [EC:2.7.11.1]+ko04626//Plant-pathogen interaction
101055520	3.32325	0	0.309347	1.37418e-06	Known_gene	47223828	47226286	NC_015443.2	4.74	5.06	5.54	5.46	5.81	9.31	0.49	2	1.95	10.88	15.36	20.44	0.309347	1.37418e-06	5.6856e-06	3.32325	0	0	GO:0005488//binding;GO:0043169//cation binding;GO:0016874//ligase activity;GO:0046872//metal ion binding;GO:0003824//catalytic activity;GO:0008270//zinc ion binding;GO:0043167//ion binding;GO:0046914//transition metal ion binding;	K19044//E3 ubiquitin-protein ligase XBAT32/33 [EC:2.3.2.27];K19044//E3 ubiquitin-protein ligase XBAT32/33 [EC:2.3.2.27]
100820700	5.83549	1.00646e-08	0.696077	0.103326	Known_gene	91007986	91010279	NC_015438.2	0.02	0.02	0	0.04	0.02	0	0	0	0	0	0.57	0	0.696077	0.103326	0.588828	5.83549	1.00646e-08	7.29064e-08	GO:0006721//terpenoid metabolic process;GO:0008152//metabolic process;GO:0006720//isoprenoid metabolic process;GO:1901576//organic substance biosynthetic process;GO:0044249//cellular biosynthetic process;GO:0008299//isoprenoid biosynthetic process;GO:0009058//biosynthetic process;GO:0071704//organic substance metabolic process;GO:0044237//cellular metabolic process;GO:0006629//lipid metabolic pro…	K18117//viridiflorene synthase [EC:4.2.3.88];K14182//vetispiradiene synthase [EC:4.2.3.21]+ko00909//Sesquiterpenoid and triterpenoid biosynthesis+ko01110//Biosynthesis of secondary metabolites
100736525	2.05179	0	0.767516	0	Known_gene	66702240	66703491	NC_015440.2	252.29	390.95	313.2	396.68	398.61	859.94	157.34	185.79	203.41	688.13	707.86	928.82	0.767516	0	0	2.05179	0	0		K03686//molecular chaperone DnaJ;K09517//DnaJ homolog subfamily B member 11+ko04141//Protein processing in endoplasmic reticulum
100736505	2.08416	8.48418e-47	0.691442	3.46175e-08	Known_gene	7154933	7157365	NC_015446.2	1.45	1.32	1	1.39	1.49	3.28	0.48	0.55	1.02	2.9	2.07	3.87	0.691442	3.46175e-08	1.36175e-07	2.08416	8.48418e-47	3.55185e-46		K20617//cytochrome P450 family 71 subfamily A
100736444	2.19633	0	-0.343159	1.8647e-17	Known_gene	86839757	86841943	NC_015438.2	13.51	31.09	24.76	2.52	14.14	39.49	6.76	11.19	13.25	39.97	41.92	65.28	-0.343159	1.8647e-17	6.02463e-17	2.19633	0	0	GO:2000112//regulation of cellular macromolecule biosynthetic process;GO:0031326//regulation of cellular biosynthetic process;GO:0050789//regulation of biological process;GO:0065007//biological regulation;GO:0019222//regulation of metabolic process;GO:0060255//regulation of macromolecule metabolic process;GO:0051171//regulation of nitrogen compound metabolic process;GO:0051252//regulation of RNA …	K16225//probable WRKY transcription factor 52+ko04626//Plant-pathogen interaction;K13459//disease resistance protein RPS2+ko04626//Plant-pathogen interaction;K13425//WRKY transcription factor 22+ko04626//Plant-pathogen interaction+ko04016//MAPK signaling pathway - plant
100316891	2.44285	6.66747e-34	0.451587	0.000387158	Known_gene	48012359	48013893	NC_015439.2	1.2	1.27	1.8	1.78	1.7	2.46	0.28	0.4	0.51	1.52	3.7	1.08	0.451587	0.000387158	0.0017708	2.44285	6.66747e-34	3.20755e-33	GO:0071704//organic substance metabolic process;GO:0044238//primary metabolic process;GO:0006012//galactose metabolic process;GO:0044281//small molecule metabolic process;GO:0005996//monosaccharide metabolic process;GO:0005975//carbohydrate metabolic process;GO:0019318//hexose metabolic process;GO:0008152//metabolic process;GO:0005622//intracellular;GO:0044464//cell part;GO:0005737//cytoplasm;GO:…	K18819//inositol 3-alpha-galactosyltransferase [EC:2.4.1.123]+ko00052//Galactose metabolism
100301908	2.02733	0	0.970986	0	Known_gene	81873594	81875176	NC_015438.2	56.7	81.37	63.6	45.05	133.06	223.8	54.57	60.63	70.59	214.42	278.75	273.15	0.970986	0	0	2.02733	0	0	GO:1901363//heterocyclic compound binding;GO:0005488//binding;GO:0003676//nucleic acid binding;GO:0043169//cation binding;GO:0097159//organic cyclic compound binding;GO:0003677//DNA binding;GO:0043167//ion binding;GO:0046914//transition metal ion binding;GO:0046872//metal ion binding;GO:0008270//zinc ion binding;
100191137	2.13225	0	0.962996	0	Known_gene	1494820	1496768	NC_015444.2	34.08	57.92	51.19	92.62	80.29	108.22	19.98	26.99	26.37	103.86	98.32	124.8	0.962996	0	0	2.13225	0	0	GO:0050789//regulation of biological process;GO:0009909//regulation of flower development;GO:0051239//regulation of multicellular organismal process;GO:0009314//response to radiation;GO:0050896//response to stimulus;GO:0050793//regulation of developmental process;GO:2000026//regulation of multicellular organismal development;GO:0009628//response to abiotic stimulus;GO:0048831//regulation of shoot…	K12135//zinc finger protein CONSTANS+ko04712//Circadian rhythm - plant;K12135//zinc finger protein CONSTANS+ko04712//Circadian rhythm - plant
100135703	2.9059	0	0.559154	4.98436e-30	Known_gene	1300942	1304547	NC_015444.2	5.54	7.4	5.9	5.02	5.42	16.17	4.28	5.71	5.74	33.2	49	30.28	0.559154	4.98436e-30	1.3323e-29	2.9059	0	0	GO:0005975//carbohydrate metabolic process;GO:0044238//primary metabolic process;GO:0008152//metabolic process;GO:1901576//organic substance biosynthetic process;GO:0005991//trehalose metabolic process;GO:0016051//carbohydrate biosynthetic process;GO:0044262//cellular carbohydrate metabolic process;GO:0034637//cellular carbohydrate biosynthetic process;GO:0005992//trehalose biosynthetic process;G…	K16055//trehalose 6-phosphate synthase/phosphatase [EC:2.4.1.15 3.1.3.12]+ko01100//Metabolic pathways+ko00500//Starch and sucrose metabolism;K16055//trehalose 6-phosphate synthase/phosphatase [EC:2.4.1.15 3.1.3.12]+ko01100//Metabolic pathways+ko00500//Starch and sucrose metabolism;K16055//trehalose 6-phosphate synthase/phosphatase [EC:2.4.1.15 3.1.3.12]+ko01100//Metabolic pathways+ko00500//Starch…
100134889	2.85459	7.27025e-09	0.252229	0.101268	Known_gene	64681376	64682705	NC_015444.2	0.21	0.09	0.26	0.09	0.46	0.13	0.03	0.09	0.06	0.32	0.85	0.13	0.252229	0.101268	0.576154	2.85459	7.27025e-09	5.24687e-08	GO:0050896//response to stimulus;GO:0006082//organic acid metabolic process;GO:0043436//oxoacid metabolic process;GO:0006721//terpenoid metabolic process;GO:0044238//primary metabolic process;GO:0009628//response to abiotic stimulus;GO:0044282//small molecule catabolic process;GO:0046395//carboxylic acid catabolic process;GO:0044248//cellular catabolic process;GO:0009056//catabolic process;GO:000…	K04125//gibberellin 2-oxidase [EC:1.14.11.13]+ko00904//Diterpenoid biosynthesis+ko01110//Biosynthesis of secondary metabolites
100134883	2.07858	0	-0.2292	3.24095e-11	Known_gene	62849885	62850952	NC_015441.2	21.65	48.14	44.52	12.94	30.68	55.99	4.33	10.69	18.95	28.04	50.4	70.07	-0.2292	3.24095e-11	1.18217e-10	2.07858	0	0	GO:2001141//regulation of RNA biosynthetic process;GO:0060255//regulation of macromolecule metabolic process;GO:0080090//regulation of primary metabolic process;GO:0019219//regulation of nucleobase-containing compound metabolic process;GO:0006355//regulation of transcription, DNA-templated;GO:0050794//regulation of cellular process;GO:0010468//regulation of gene expression;GO:0050789//regulation …	K05747//Wiskott-Aldrich syndrome protein+ko04144//Endocytosis
100037728	2.99898	4.2957e-06	-0.736883	0.0505903	Known_gene	14933554	14935391	NC_015446.2	0.07	0.04	0.11	0.07	0.02	0.04	0.02	0.02	0.02	0.02	0.37	0.05	-0.736883	0.0505903	0.274195	2.99898	4.2957e-06	3.3877e-05		K14494//DELLA protein+ko04075//Plant hormone signal transduction
100037498	3.03066	0	-0.0281984	0.12004	Known_gene	90259397	90261870	NC_015438.2	2.8	4.99	4.64	1.75	3.37	7.03	0.6	1.25	3.72	10.81	11.7	24.22	-0.0281984	0.12004	0.692925	3.03066	0	0	GO:0080090//regulation of primary metabolic process;GO:2000112//regulation of cellular macromolecule biosynthetic process;GO:0006355//regulation of transcription, DNA-templated;GO:0031326//regulation of cellular biosynthetic process;GO:0010468//regulation of gene expression;GO:0065007//biological regulation;GO:0050789//regulation of biological process;GO:2001141//regulation of RNA biosynthetic pr…	K14494//DELLA protein+ko04075//Plant hormone signal transduction;K14494//DELLA protein+ko04075//Plant hormone signal transduction
BGI_novel_G000775	-5.56326	2.28656e-08	0.747136	5.88237e-11	Novel_gene	4571654	4574352	NC_015449.2	2.23	3.06	1.29	3.41	3.1	4.55	0.76	0	0	0	0	0	0.747136	5.88237e-11	2.15754e-10	-5.56326	2.28656e-08	1.67315e-07	GO:0044275//cellular carbohydrate catabolic process;GO:0010412//mannan metabolic process;GO:0044264//cellular polysaccharide metabolic process;GO:0043170//macromolecule metabolic process;GO:0005976//polysaccharide metabolic process;GO:0044248//cellular catabolic process;GO:0009057//macromolecule catabolic process;GO:0009056//catabolic process;GO:0016052//carbohydrate catabolic process;GO:0016998/…	K19355//mannan endo-1,4-beta-mannosidase [EC:3.2.1.78]+ko00051//Fructose and mannose metabolism
BGI_novel_G000753	-2.96715	8.24064e-25	0.917218	0.00354686	Novel_gene	38360439	38368806	NC_015448.2	0.32	0.19	0	0.35	0.6	0	1.8	1.81	0	0.19	0	0.31	0.917218	0.00354686	0.0172136	-2.96715	8.24064e-25	4.47756e-24	GO:0005506//iron ion binding;GO:0016491//oxidoreductase activity;GO:0046906//tetrapyrrole binding;GO:0003824//catalytic activity;GO:0004497//monooxygenase activity;GO:0005488//binding;GO:0043169//cation binding;GO:0046914//transition metal ion binding;GO:0097159//organic cyclic compound binding;GO:0043167//ion binding;GO:0020037//heme binding;GO:0016705//oxidoreductase activity, acting on paired …	K15747//beta-ring hydroxylase [EC:1.14.-.-]+ko00906//Carotenoid biosynthesis+ko01100//Metabolic pathways+ko01110//Biosynthesis of secondary metabolites
BGI_novel_G000720	-6.53452	1.53375e-25			Novel_gene	2835827	2839450	NC_015448.2	0	0	0	0	0.21	0	2.07	2.36	1.23	0	0.06	0				-6.53452	1.53375e-25	8.25105e-25	GO:0000003//reproduction;GO:0048573//photoperiodism, flowering;GO:0050789//regulation of biological process;GO:2000241//regulation of reproductive process;GO:0009648//photoperiodism;GO:0061458//reproductive system development;GO:0032501//multicellular organismal process;GO:0009628//response to abiotic stimulus;GO:0007275//multicellular organism development;GO:0051239//regulation of multicellular …	K16223//protein FLOWERING LOCUS T+ko04712//Circadian rhythm - plant
BGI_novel_G000719	-3.62906	6.69943e-05	-1.69624	0.0102214	Novel_gene	2835827	2836434	NC_015448.2	0.12	0.43	0.06	0.06	0	0.13	0.36	0	0.52	0.06	0	0	-1.69624	0.0102214	0.0516778	-3.62906	6.69943e-05	0.000555663	GO:0050896//response to stimulus;GO:0065007//biological regulation;GO:0048856//anatomical structure development;GO:2000026//regulation of multicellular organismal development;GO:0000003//reproduction;GO:0061458//reproductive system development;GO:0051239//regulation of multicellular organismal process;GO:0048831//regulation of shoot system development;GO:0009648//photoperiodism;GO:0032501//multic…	K16223//protein FLOWERING LOCUS T+ko04712//Circadian rhythm - plant
BGI_novel_G000547	-2.1303	2.95563e-08			Novel_gene	45997468	45998136	NC_015445.2	0	0.05	0.15	0	0	0	1.14	1.13	0.75	0.29	0.24	0.15				-2.1303	2.95563e-08	2.1713e-07	GO:0003676//nucleic acid binding;GO:0003677//DNA binding;GO:0005515//protein binding;GO:0046983//protein dimerization activity;GO:0097159//organic cyclic compound binding;GO:1901363//heterocyclic compound binding;GO:0005488//binding;	K20890//xylan alpha-glucuronosyltransferase [EC:2.4.1.-]
BGI_novel_G000516	-2.54847	3.67684e-63	0.801537	3.27356e-05	Novel_gene	56799043	56800507	NC_015444.2	0.63	0.55	0.49	1.19	0.57	1.17	3.47	3.38	4.2	0.42	0.5	1.07	0.801537	3.27356e-05	0.000142688	-2.54847	3.67684e-63	1.31925e-62	GO:0008152//metabolic process;GO:0016758//transferase activity, transferring hexosyl groups;GO:0003824//catalytic activity;GO:0016757//transferase activity, transferring glycosyl groups;GO:0016740//transferase activity;	K08237//hydroquinone glucosyltransferase [EC:2.4.1.218]
BGI_novel_G000511	-2.72558	0.000230316			Novel_gene	53975567	53975779	NC_015444.2	0	0	0	0	0	0	0.17	0.87	2.24	0	0.23	0.32				-2.72558	0.000230316	0.00196119	GO:0015031//protein transport;GO:0042886//amide transport;GO:0051234//establishment of localization;GO:0071702//organic substance transport;GO:0006810//transport;GO:0045184//establishment of protein localization;GO:0051179//localization;GO:0015833//peptide transport;GO:0033036//macromolecule localization;GO:0071705//nitrogen compound transport;GO:0008104//protein localization;GO:0009526//plastid …
BGI_novel_G000509	-4.56646	4.35845e-08	-0.397645	0.137808	Novel_gene	51862562	51863079	NC_015444.2	0	0.12	0.06	0	0	0.14	0.5	0.55	1.67	0.1	0	0	-0.397645	0.137808	0.804881	-4.56646	4.35845e-08	3.21562e-07		K17604//zinc finger SWIM domain-containing protein 3
BGI_novel_G000419	-6.04754	8.97943e-11			Novel_gene	1311370	1315795	NC_015443.2	0	0	0	0	0	0	0	0	0.43	0	0	0				-6.04754	8.97943e-11	6.17822e-10	GO:0090304//nucleic acid metabolic process;GO:0046483//heterocycle metabolic process;GO:0043412//macromolecule modification;GO:0043170//macromolecule metabolic process;GO:0034641//cellular nitrogen compound metabolic process;GO:0009451//RNA modification;GO:0008152//metabolic process;GO:0006139//nucleobase-containing compound metabolic process;GO:0071704//organic substance metabolic process;GO:190…	K17964//leucine-rich PPR motif-containing protein, mitochondrial
BGI_novel_G000367	-2.75088	1.45615e-199			Novel_gene	10459016	10462092	NC_015442.2	0	0	0	0	0	0	3.26	9.01	7.1	0.56	1.32	1.05				-2.75088	1.45615e-199	2.42803e-199		K11323//histone arginine demethylase JMJD6 [EC:1.14.11.-]
BGI_novel_G000366	-2.88922	4.49434e-102			Novel_gene	10459016	10462092	NC_015442.2	0.06	0	0	0	0	0	2.06	4.3	4.05	0.19	1.07	0.09				-2.88922	4.49434e-102	1.21589e-101	GO:0005488//binding;GO:0043169//cation binding;GO:0043167//ion binding;GO:0046872//metal ion binding;	K11323//histone arginine demethylase JMJD6 [EC:1.14.11.-]
BGI_novel_G000283	-7.0563	1.38597e-18			Novel_gene	5460478	5463387	NC_015441.2	0	0	0	0	0	0	0.92	0.9	1.56	0	0	0				-7.0563	1.38597e-18	8.23236e-18	GO:0006952//defense response;GO:0006950//response to stress;GO:0050896//response to stimulus;GO:0032555//purine ribonucleotide binding;GO:0097367//carbohydrate derivative binding;GO:0043531//ADP binding;GO:0032553//ribonucleotide binding;GO:0036094//small molecule binding;GO:1901265//nucleoside phosphate binding;GO:1901363//heterocyclic compound binding;GO:0097159//organic cyclic compound binding…
BGI_novel_G000282	-2.70959	2.89143e-38	-0.959275	0.101261	Novel_gene	5458139	5459421	NC_015441.2	0	0.05	0	0	0	0.03	2.01	1.9	3.11	0.23	0.36	0.52	-0.959275	0.101261	0.576055	-2.70959	2.89143e-38	1.32454e-37	GO:0006952//defense response;GO:0006950//response to stress;GO:0050896//response to stimulus;GO:0032555//purine ribonucleotide binding;GO:0097159//organic cyclic compound binding;GO:0032553//ribonucleotide binding;GO:0032559//adenyl ribonucleotide binding;GO:0043168//anion binding;GO:0030554//adenyl nucleotide binding;GO:1901363//heterocyclic compound binding;GO:0036094//small molecule binding;GO…	K13457//disease resistance protein RPM1+ko04626//Plant-pathogen interaction
BGI_novel_G000273	-2.19454	2.46488e-33	-0.00455642	0.163923	Novel_gene	4431262	4439859	NC_015441.2	1.85	2.51	2.09	1.89	1.81	2.78	2.85	2.33	2.1	0.62	0.5	0.46	-0.00455642	0.163923	0.971789	-2.19454	2.46488e-33	1.19358e-32	GO:0005623//cell;GO:0044424//intracellular part;GO:0005840//ribosome;GO:0030529//intracellular ribonucleoprotein complex;GO:0043228//non-membrane-bounded organelle;GO:0044444//cytoplasmic part;GO:0005622//intracellular;GO:1990904//ribonucleoprotein complex;GO:0043229//intracellular organelle;GO:0044464//cell part;GO:0032991//macromolecular complex;GO:0005737//cytoplasm;GO:0043226//organelle;GO:00…	K17435//large subunit ribosomal protein L54
BGI_novel_G000262	-3.43286	1.69105e-15	-1.2072	0.00757319	Novel_gene	1363397	1364339	NC_015441.2	0.6	0.3	0.23	0.06	0.24	0.19	1.75	1.01	1.79	0.06	0.2	0.17	-1.2072	0.00757319	0.0377412	-3.43286	1.69105e-15	1.05882e-14	GO:0006950//response to stress;GO:0050896//response to stimulus;GO:0006952//defense response;GO:0009607//response to biotic stimulus;
BGI_novel_G000202	-2.4072	6.04118e-08	-0.925191	5.84447e-05	Novel_gene	8400125	8400558	NC_015440.2	2.55	2.11	3.18	1.56	2.01	0.58	1.32	1.83	0.84	0.39	0.13	0.25	-0.925191	5.84447e-05	0.000257561	-2.4072	6.04118e-08	4.47401e-07	GO:0005515//protein binding;GO:0005488//binding;GO:0046983//protein dimerization activity;	K10398//kinesin family member 11
BGI_novel_G000175	-5.52152	3.43341e-08	-0.12032	0.110173	Novel_gene	50911869	50921300	NC_015439.2	0.23	0.64	1.06	0.51	1.02	0.25	0.41	0.2	0.13	0	0	0	-0.12032	0.110173	0.630731	-5.52152	3.43341e-08	2.52656e-07	GO:0050896//response to stimulus;GO:0046483//heterocycle metabolic process;GO:0006807//nitrogen compound metabolic process;GO:0006996//organelle organization;GO:0140013//meiotic nuclear division;GO:0007049//cell cycle;GO:0071704//organic substance metabolic process;GO:0006950//response to stress;GO:0051321//meiotic cell cycle;GO:0090304//nucleic acid metabolic process;GO:0044237//cellular metabol…	K08739//DNA mismatch repair protein MLH3+ko03430//Mismatch repair;K13429//chitin elicitor receptor kinase 1+ko04626//Plant-pathogen interaction
BGI_novel_G000105	-2.43445	3.66597e-15	0.433548	0.00409969	Novel_gene	91660498	91665962	NC_015438.2	1.1	0.57	0.41	1.03	0.94	0.83	1.51	0.1	0.46	0	0.18	0.23	0.433548	0.00409969	0.0200229	-2.43445	3.66597e-15	2.31055e-14	GO:1901575//organic substance catabolic process;GO:0009057//macromolecule catabolic process;GO:1901565//organonitrogen compound catabolic process;GO:0009056//catabolic process;GO:0009987//cellular process;GO:0071704//organic substance metabolic process;GO:0008152//metabolic process;GO:0006457//protein folding;GO:0006807//nitrogen compound metabolic process;GO:0006508//proteolysis;GO:0030163//prot…	K03544//ATP-dependent Clp protease ATP-binding subunit ClpX
BGI_novel_G000065	-4.11485	2.35069e-32	1.5557	0.00446256	Novel_gene	60250021	60253192	NC_015438.2	0	0.09	0	0.12	0	0.15	1.13	1.22	0.23	0	0	0.18	1.5557	0.00446256	0.0218344	-4.11485	2.35069e-32	1.15361e-31	GO:0031224//intrinsic component of membrane;GO:0016020//membrane;GO:0016021//integral component of membrane;GO:0044425//membrane part;	K01193//beta-fructofuranosidase [EC:3.2.1.26]+ko01100//Metabolic pathways+ko00052//Galactose metabolism+ko00500//Starch and sucrose metabolism;K07393//glutathionyl-hydroquinone reductase [EC:1.8.5.7]
BGI_novel_G000021	-5.35248	1.61347e-07			Novel_gene	2159260	2165636	NC_015438.2	0	0	0	0	0	0	0.21	0	0	0	0	0				-5.35248	1.61347e-07	1.21229e-06	GO:0006796//phosphate-containing compound metabolic process;GO:0043412//macromolecule modification;GO:0071704//organic substance metabolic process;GO:0036211//protein modification process;GO:0006464//cellular protein modification process;GO:0044237//cellular metabolic process;GO:0006468//protein phosphorylation;GO:0006807//nitrogen compound metabolic process;GO:1901564//organonitrogen compound me…	K04733//interleukin-1 receptor-associated kinase 4 [EC:2.7.11.1]
778300	-2.72851	0	-0.858128	1.41595e-37	Known_gene	55214330	55215093	NC_015441.2	35.65	20.97	37.89	25.79	7.05	20.22	198.46	167.22	124.87	19.49	19.39	40.32	-0.858128	1.41595e-37	3.4815e-37	-2.72851	0	0	GO:0043169//cation binding;GO:0043167//ion binding;GO:0046872//metal ion binding;GO:0005488//binding;
544303	-2.46045	5.73895e-08	0.0407248	0.163424	Known_gene	49418254	49423348	NC_015443.2	0	0.03	0.02	0	0.03	0.03	0.2	0.21	0.18	0.04	0.06	0	0.0407248	0.163424	0.968155	-2.46045	5.73895e-08	4.24662e-07	GO:0008152//metabolic process;GO:0003824//catalytic activity;GO:0043167//ion binding;GO:0043169//cation binding;GO:0005488//binding;GO:0016838//carbon-oxygen lyase activity, acting on phosphates;GO:0016829//lyase activity;GO:0010333//terpene synthase activity;GO:0016835//carbon-oxygen lyase activity;GO:0000287//magnesium ion binding;GO:0046872//metal ion binding;	K04120//ent-copalyl diphosphate synthase [EC:5.5.1.13]+ko00904//Diterpenoid biosynthesis+ko01100//Metabolic pathways+ko01110//Biosynthesis of secondary metabolites
544150	-4.58973	3.02038e-37	-0.473848	0.0894199	Known_gene	48052463	48054698	NC_015439.2	0.02	0.06	0.12	0.1	0.02	0.02	0.31	2.56	0.49	0.09	0.05	0	-0.473848	0.0894199	0.501705	-4.58973	3.02038e-37	1.39987e-36	GO:0009813//flavonoid biosynthetic process;GO:0046283//anthocyanin-containing compound metabolic process;GO:1901576//organic substance biosynthetic process;GO:0055114//oxidation-reduction process;GO:0008152//metabolic process;GO:0009812//flavonoid metabolic process;GO:0009718//anthocyanin-containing compound biosynthetic process;GO:0071704//organic substance metabolic process;GO:0046148//pigment …	K13082//bifunctional dihydroflavonol 4-reductase/flavanone 4-reductase [EC:1.1.1.219 1.1.1.234]+ko01100//Metabolic pathways+ko01110//Biosynthesis of secondary metabolites+ko00941//Flavonoid biosynthesis;K13082//bifunctional dihydroflavonol 4-reductase/flavanone 4-reductase [EC:1.1.1.219 1.1.1.234]+ko01100//Metabolic pathways+ko01110//Biosynthesis of secondary metabolites+ko00941//Flavonoid biosyn…
544092	-2.04541	8.13734e-16	-0.967496	2.33326e-14	Known_gene	61329837	61331209	NC_015447.2	3.31	5.24	1.19	0.47	1.76	2.79	1.34	0.69	1.73	0.47	0.12	0.31	-0.967496	2.33326e-14	7.96066e-14	-2.04541	8.13734e-16	5.06342e-15	GO:0005975//carbohydrate metabolic process;GO:0008152//metabolic process;GO:0071704//organic substance metabolic process;GO:0044238//primary metabolic process;GO:0003824//catalytic activity;GO:0016798//hydrolase activity, acting on glycosyl bonds;GO:0042973//glucan endo-1,3-beta-D-glucosidase activity;GO:0016787//hydrolase activity;GO:0008422//beta-glucosidase activity;GO:0015926//glucosidase act…	K19891//glucan endo-1,3-beta-glucosidase 1/2/3 [EC:3.2.1.39]+ko00500//Starch and sucrose metabolism;K19893//glucan endo-1,3-beta-glucosidase 5/6 [EC:3.2.1.39]+ko00500//Starch and sucrose metabolism
543963	-2.50881	3.77635e-09	-0.85236	0.000344913	Known_gene	4263426	4264869	NC_015448.2	0.45	0.87	2.49	1.1	0.46	0.59	0.76	1.45	0.43	0.16	0.06	0.28	-0.85236	0.000344913	0.00157359	-2.50881	3.77635e-09	2.70659e-08	GO:0050896//response to stimulus;GO:1901700//response to oxygen-containing compound;GO:0009266//response to temperature stimulus;GO:0014070//response to organic cyclic compound;GO:0010286//heat acclimation;GO:0009751//response to salicylic acid;GO:0001101//response to acid chemical;GO:0010033//response to organic substance;GO:0006950//response to stress;GO:0009628//response to abiotic stimulus;GO…	K03860//phosphatidylinositol glycan, class Q+ko01100//Metabolic pathways+ko00563//Glycosylphosphatidylinositol (GPI)-anchor biosynthesis
543899	-2.89583	2.69009e-15	-3.95928	0.00128634	Known_gene	2663373	2666720	NC_015440.2	0.06	0.02	0.08	0	0	0	0.35	1.25	0.13	0	0.18	0.06	-3.95928	0.00128634	0.00606037	-2.89583	2.69009e-15	1.6913e-14	GO:0015893//drug transport;GO:0006810//transport;GO:0055085//transmembrane transport;GO:0042493//response to drug;GO:0051179//localization;GO:0051234//establishment of localization;GO:0042221//response to chemical;GO:0006855//drug transmembrane transport;GO:0050896//response to stimulus;GO:0044425//membrane part;GO:0016020//membrane;GO:0016021//integral component of membrane;GO:0031224//intrinsic…	K03327//multidrug resistance protein, MATE family;K03327//multidrug resistance protein, MATE family
543887	-3.80837	0.000931813	0.0407248	0.164478	Known_gene	64698755	64705266	NC_015440.2	0	0.05	0	0	0.05	0	0	0.02	0.19	0	0	0	0.0407248	0.164478	0.977479	-3.80837	0.000931813	0.00822548	GO:0031326//regulation of cellular biosynthetic process;GO:0065007//biological regulation;GO:0080090//regulation of primary metabolic process;GO:0010556//regulation of macromolecule biosynthetic process;GO:0051171//regulation of nitrogen compound metabolic process;GO:0050789//regulation of biological process;GO:0019222//regulation of metabolic process;GO:0050794//regulation of cellular process;GO…	K09264//MADS-box transcription factor, plant
543756	-2.77214	0	0.461326	6.82261e-19	Known_gene	4779891	4784108	NC_015441.2	11.16	10.49	9.59	18.83	12.16	11.97	77.98	96.43	46.17	16.81	5.64	9.75	0.461326	6.82261e-19	2.15028e-18	-2.77214	0	0		K01915//glutamine synthetase [EC:6.3.1.2]+ko00250//Alanine, aspartate and glutamate metabolism+ko00910//Nitrogen metabolism+ko00220//Arginine biosynthesis+ko01230//Biosynthesis of amino acids+ko01100//Metabolic pathways+ko00630//Glyoxylate and dicarboxylate metabolism
543615	-2.47134	0.000103133	-3.1292	0.00166355	Known_gene	2098944	2099585	NC_015448.2	0.17	0.29	0.05	0	0.06	0	0.97	0.11	0	0.12	0	0.08	-3.1292	0.00166355	0.00789332	-2.47134	0.000103133	0.000862612
543611	-2.05089	0	-0.596345	7.19579e-188	Known_gene	53899559	53906998	NC_015448.2	46.13	43.94	50.85	32.01	34	26.63	58.03	49.89	45.53	15.19	10.29	10.84	-0.596345	7.19579e-188	6.8381e-188	-2.05089	0	0	GO:0044238//primary metabolic process;GO:0005975//carbohydrate metabolic process;GO:0071704//organic substance metabolic process;GO:0008152//metabolic process;GO:0016021//integral component of membrane;GO:0016020//membrane;GO:0044425//membrane part;GO:0043226//organelle;GO:0071944//cell periphery;GO:0044464//cell part;GO:0043227//membrane-bounded organelle;GO:0044424//intracellular part;GO:000573…	K12309//beta-galactosidase [EC:3.2.1.23]+ko00600//Sphingolipid metabolism+ko00604//Glycosphingolipid biosynthesis - ganglio series+ko00531//Glycosaminoglycan degradation+ko00511//Other glycan degradation+ko01100//Metabolic pathways+ko00052//Galactose metabolism
543544	-2.39333	2.73915e-08	0.217603	0.081575	Known_gene	2498439	2501220	NC_015443.2	0.75	1.06	0.83	0.7	1.87	0.5	0.29	1.5	1.05	0	0.39	0.16	0.217603	0.081575	0.455722	-2.39333	2.73915e-08	2.00943e-07	GO:0009755//hormone-mediated signaling pathway;GO:0080090//regulation of primary metabolic process;GO:0009719//response to endogenous stimulus;GO:1903506//regulation of nucleic acid-templated transcription;GO:0090354//regulation of auxin metabolic process;GO:0071365//cellular response to auxin stimulus;GO:0071495//cellular response to endogenous stimulus;GO:0070887//cellular response to chemical …	K14484//auxin-responsive protein IAA+ko04075//Plant hormone signal transduction
109121320	-3.80837	0.000931813			Known_gene	34592925	34595859	NC_015447.2	0.02	0	0	0	0	0	0.07	0.07	0	0	0	0				-3.80837	0.000931813	0.00822548
109120973	-2.01506	5.71596e-06	-0.216016	0.0902389	Known_gene	58437136	58437673	NC_015445.2	1.1	1.11	0.72	1.58	0.62	0.29	0.62	0.61	1.36	0.44	0.08	0.1	-0.216016	0.0902389	0.506629	-2.01506	5.71596e-06	4.53083e-05		K02694//photosystem I subunit III+ko01100//Metabolic pathways+ko00195//Photosynthesis
109119882	-4.50881	4.99222e-05			Known_gene	47730793	47734546	NC_015438.2	0	0	0	0	0	0	0.07	0.04	0.07	0	0	0				-4.50881	4.99222e-05	0.000411687
109119564	-7.37762	3.6336e-22	-0.810142	1.01932e-10	Known_gene	38743001	38744816	NC_015439.2	1.69	3.38	1.56	1.38	1.08	1.3	0.47	0.71	0.76	0	0	0	-0.810142	1.01932e-10	3.75969e-10	-7.37762	3.6336e-22	2.05125e-21		K13420//LRR receptor-like serine/threonine-protein kinase FLS2 [EC:2.7.11.1]+ko04626//Plant-pathogen interaction+ko04016//MAPK signaling pathway - plant
109118833	-3.13246	1.3716e-05			Known_gene	1870794	1871423	NC_015448.2	0	0	0	0	0	0	0.72	0.45	1.09	0.12	0	0.16				-3.13246	1.3716e-05	0.00011027
109118704	-2.31228	4.38187e-253	-0.915282	4.13742e-60	Known_gene	97324790	97325379	NC_015438.2	28.85	33.1	50.14	12.72	22.09	25.91	37.83	52.44	44.78	13.03	7.6	6.21	-0.915282	4.13742e-60	8.18205e-60	-2.31228	4.38187e-253	6.01348e-253	GO:0042221//response to chemical;GO:0010033//response to organic substance;GO:0009733//response to auxin;GO:0050896//response to stimulus;GO:0009719//response to endogenous stimulus;GO:0009725//response to hormone;	K14488//SAUR family protein+ko04075//Plant hormone signal transduction
104649133	-5.1303	9.84696e-07			Known_gene	4081537	4085804	NC_015446.2	0	0	0	0	0	0	0.05	0.05	0.15	0	0	0				-5.1303	9.84696e-07	7.59021e-06		K03979//GTPase [EC:3.6.5.-]
104649095	-4.9783	2.96675e-06	-0.596705	0.0596826	Known_gene	612128	613847	NC_015446.2	0.08	0.1	0.09	0.06	0.06	0.06	0.04	0.22	0.11	0	0	0	-0.596705	0.0596826	0.327132	-4.9783	2.96675e-06	2.32783e-05
104649061	-2.89583	7.23395e-05	-0.959275	0.0395366	Known_gene	4543136	4543556	NC_015446.2	0.09	0.46	0.35	0.09	0.09	0.29	1.28	0.18	0.1	0.1	0	0.13	-0.959275	0.0395366	0.211186	-2.89583	7.23395e-05	0.000601158
104648378	-4.76257	4.87901e-09	-0.833744	0.00193144	Known_gene	64237019	64237768	NC_015444.2	1.24	0.63	0.73	0.1	1.11	0.25	0.86	0.38	0.25	0	0.05	0	-0.833744	0.00193144	0.00919896	-4.76257	4.87901e-09	3.50673e-08
104648072	-3.12512	7.74868e-13	-0.949547	0.000557795	Known_gene	79547043	79552364	NC_015438.2	0.53	0.43	0.43	0.34	0.19	0.18	0.43	0.55	0.56	0.06	0.1	0	-0.949547	0.000557795	0.00257549	-3.12512	7.74868e-13	5.09394e-12
104648066	-3.13264	0.000283214			Known_gene	41229774	41230472	NC_015443.2	0	0	0	0	0	0	0.1	0.34	0.3	0.06	0	0.03				-3.13264	0.000283214	0.0024238
104648045	-2.65434	1.41255e-236	-0.994194	1.84077e-35	Known_gene	42667821	42675952	NC_015443.2	3.57	3.27	3.41	2.4	1.66	2.04	6.57	5.91	5.69	1.1	1.21	1.04	-0.994194	1.84077e-35	4.62574e-35	-2.65434	1.41255e-236	2.03869e-236	GO:0048523//negative regulation of cellular process;GO:0048519//negative regulation of biological process;GO:0050789//regulation of biological process;GO:0060548//negative regulation of cell death;GO:0010941//regulation of cell death;GO:0065007//biological regulation;GO:0050794//regulation of cellular process;GO:0005544//calcium-dependent phospholipid binding;GO:0043168//anion binding;GO:0008289/…	K20100//YTH domain-containing protein 1;K10457//kelch-like protein 20;K20100//YTH domain-containing protein 1;K22030//leiomodin;K15046//influenza virus NS1A-binding protein;K20100//YTH domain-containing protein 1;K22030//leiomodin;K20100//YTH domain-containing protein 1;K22030//leiomodin;K15046//influenza virus NS1A-binding protein;K22030//leiomodin;K20100//YTH domain-containing protein 1
104647566	-2.23385	1.39998e-28	-2.95928	0.00304083	Known_gene	63595594	63597908	NC_015442.2	0.07	0.2	0.26	0.07	0	0	6.75	5	4	1.08	1.67	0.57	-2.95928	0.00304083	0.0147101	-2.23385	1.39998e-28	7.22268e-28
104647481	-4.78946	0.000724428	2.41512	0.0076109	Known_gene	14713054	14714569	NC_015442.2	0.04	0	0	0	0.06	0.17	0.11	0.03	0.11	0	0.01	0	2.41512	0.0076109	0.0379375	-4.78946	0.000724428	0.00634755
104647303	-3.7559	7.71286e-23	-2.95928	0.00304083	Known_gene	4431420	4432381	NC_015442.2	0.07	0.15	0.07	0	0.04	0	2.46	0.83	0.7	0.12	0.04	0.15	-2.95928	0.00304083	0.0147101	-3.7559	7.71286e-23	4.30938e-22
104646748	-2.00275	6.69851e-26	-0.354135	0.0324767	Known_gene	59432358	59436703	NC_015438.2	0.5	0.74	0.6	0.63	0.38	0.61	2.21	2.11	1.92	0.87	0.16	0.84	-0.354135	0.0324767	0.171975	-2.00275	6.69851e-26	3.5852e-25		K07466//replication factor A1+ko03440//Homologous recombination+ko03420//Nucleotide excision repair+ko03030//DNA replication+ko03430//Mismatch repair;K07466//replication factor A1+ko03440//Homologous recombination+ko03420//Nucleotide excision repair+ko03030//DNA replication+ko03430//Mismatch repair
104646508	-2.18688	4.05728e-08	-0.703436	0.00272037	Known_gene	59753732	59754379	NC_015440.2	1.28	1.02	1.39	0.78	1.02	0.48	0.79	1.44	0.71	0.12	0.25	0.31	-0.703436	0.00272037	0.013109	-2.18688	4.05728e-08	2.99006e-07
104646236	-2.31087	0.000285519	-1.86617	0.0022762	Known_gene	13188562	13190807	NC_015440.2	0.15	0.16	0.07	0.05	0	0.05	0.26	0.13	0.05	0.03	0.06	0	-1.86617	0.0022762	0.0109035	-2.31087	0.000285519	0.00244471		K15889//prenylcysteine alpha-carboxyl methylesterase [EC:3.1.1.-]+ko00900//Terpenoid backbone biosynthesis
104646018	-3.2678	0.000405649	-2.41871	0.00214184	Known_gene	46530042	46530758	NC_015439.2	0.3	0.15	0.1	0	0.05	0.05	0	0.15	0.43	0.05	0	0	-2.41871	0.00214184	0.0102416	-3.2678	0.000405649	0.00349955		K19038//E3 ubiquitin-protein ligase ATL41 [EC:2.3.2.27];K11982//E3 ubiquitin-protein ligase RNF115/126 [EC:2.3.2.27];K19040//E3 ubiquitin-protein ligase ATL10/75/76/77/78 [EC:2.3.2.27]
104645864	-2.61573	0.000366411	0.0407248	0.160425	Known_gene	41556916	41558217	NC_015439.2	0.16	0.11	0.03	0.11	0.13	0.06	0.27	0.08	0.03	0.03	0.03	0	0.0407248	0.160425	0.947215	-2.61573	0.000366411	0.00315346		K20718//LRR receptor-like serine/threonine-protein kinase ERECTA [EC:2.7.11.1]+ko04016//MAPK signaling pathway - plant
104645802	-4.61573	2.81898e-05			Known_gene	44600638	44603494	NC_015439.2	0	0	0	0	0	0	0.17	0	0	0	0	0				-4.61573	2.81898e-05	0.000229726		K19090//CRISPR-associated protein Cas5t;K03798//cell division protease FtsH [EC:3.4.24.-];K10683//BRCA1-associated RING domain protein 1+ko03440//Homologous recombination
104645625	-2.69831	1.99216e-07	-1.32851	0.0290146	Known_gene	30307040	30307860	NC_015439.2	0.34	0	0.11	0.06	0	0.13	0.48	0.89	0.81	0.24	0.07	0	-1.32851	0.0290146	0.152749	-2.69831	1.99216e-07	1.50136e-06		K11816//indole-3-pyruvate monooxygenase [EC:1.14.13.168]+ko00380//Tryptophan metabolism+ko01100//Metabolic pathways
104645439	-2.78624	7.3439e-44	-0.858416	1.85922e-09	Known_gene	97419955	97425397	NC_015438.2	1.23	1.54	2.6	0.85	1.15	0.86	2.1	3.6	2.18	0.75	0.21	0.25	-0.858416	1.85922e-09	7.07693e-09	-2.78624	7.3439e-44	3.16078e-43	GO:0010033//response to organic substance;GO:0050896//response to stimulus;GO:0042221//response to chemical;GO:0009719//response to endogenous stimulus;GO:0009725//response to hormone;GO:0009733//response to auxin;	K14488//SAUR family protein+ko04075//Plant hormone signal transduction;K14488//SAUR family protein+ko04075//Plant hormone signal transduction
104644920	-3.87704	0.00073893	-1.1562	0.0308709	Known_gene	5489493	5491242	NC_015449.2	0.08	0.19	0	0	0.06	0.06	0.17	0.08	0	0	0	0	-1.1562	0.0308709	0.163116	-3.87704	0.00073893	0.00647845
104644833	-2.58096	7.13232e-08	0.863847	0.0152761	Known_gene	2770755	2773871	NC_015449.2	0	0.11	0.03	0.06	0.07	0.13	0.05	0.24	0.16	0.01	0.06	0	0.863847	0.0152761	0.0782882	-2.58096	7.13232e-08	5.2928e-07		K10406//kinesin family member C2/C3;K13466//EIX receptor 1/2+ko04626//Plant-pathogen interaction;K19613//leucine-rich repeat protein SHOC2
104644788	-3.71526	9.42238e-123	1.1562	0.017849	Known_gene	56230421	56231390	NC_015448.2	0	0.04	0.2	0.08	0.17	0.32	9.13	10.7	7.97	0.59	1.1	0.41	1.1562	0.017849	0.0921462	-3.71526	9.42238e-123	2.24571e-122
104644302	-2.44797	0	-0.680817	1.56775e-53	Known_gene	97299977	97343761	NC_015438.2	65.23	75.81	110.83	28.91	57.56	81.97	93.19	152.27	117.34	31.5	18.91	14.38	-0.680817	1.56775e-53	3.30165e-53	-2.44797	0	0	GO:0009733//response to auxin;GO:0010033//response to organic substance;GO:0009725//response to hormone;GO:0009719//response to endogenous stimulus;GO:0050896//response to stimulus;GO:0042221//response to chemical;	K14488//SAUR family protein+ko04075//Plant hormone signal transduction;K14488//SAUR family protein+ko04075//Plant hormone signal transduction
101268861	-2.50881	0.000622953	1.1562	0.017849	Known_gene	55174289	55176605	NC_015441.2	0.08	0.03	0.05	0.11	0.19	0.06	0.19	0.05	0.11	0	0.03	0.04	1.1562	0.017849	0.0921462	-2.50881	0.000622953	0.00544067		K05609//ubiquitin carboxyl-terminal hydrolase L3 [EC:3.4.19.12]
101268644	-3.9783	0.000514354			Known_gene	54492271	54493115	NC_015448.2	0	0	0	0.04	0.04	0	0.34	0	0.04	0	0	0				-3.9783	0.000514354	0.00446798		K04733//interleukin-1 receptor-associated kinase 4 [EC:2.7.11.1]
101268410	-2.91271	4.54587e-22	-0.811024	4.70605e-08	Known_gene	59643555	59646303	NC_015444.2	1.61	1.35	1.57	0.61	1.3	0.67	1.54	0.65	0.4	0.19	0.11	0.03	-0.811024	4.70605e-08	1.86002e-07	-2.91271	4.54587e-22	2.57072e-21	GO:0005975//carbohydrate metabolic process;GO:0071704//organic substance metabolic process;GO:0044238//primary metabolic process;GO:0008152//metabolic process;GO:0004553//hydrolase activity, hydrolyzing O-glycosyl compounds;GO:0016787//hydrolase activity;GO:0003824//catalytic activity;GO:0016798//hydrolase activity, acting on glycosyl bonds;	K19891//glucan endo-1,3-beta-glucosidase 1/2/3 [EC:3.2.1.39]+ko00500//Starch and sucrose metabolism
101267994	-2.53514	5.54962e-64	-0.761176	8.43148e-13	Known_gene	65746941	65749014	NC_015442.2	2.56	2.12	2.76	1.05	2.14	1.21	3.24	2.65	1.9	0.69	0.35	0.27	-0.761176	8.43148e-13	2.97404e-12	-2.53514	5.54962e-64	1.97885e-63		K05681//ATP-binding cassette, subfamily G (WHITE), member 2+ko02010//ABC transporters
101267917	-3.71526	4.06623e-05	0.303759	0.108835	Known_gene	64746503	64747211	NC_015445.2	0.15	0.1	0.24	0.05	0.46	0.11	0.15	0.25	0.38	0.05	0	0	0.303759	0.108835	0.622165	-3.71526	4.06623e-05	0.000333766		K14440//SWI/SNF-related matrix-associated actin-dependent regulator of chromatin subfamily A-like protein 1 [EC:3.6.4.12];K19027//zinc finger FYVE domain-containing protein 26;K01870//isoleucyl-tRNA synthetase [EC:6.1.1.5]+ko00970//Aminoacyl-tRNA biosynthesis
101267830	-3.89583	1.29254e-05	-0.747771	0.0309257	Known_gene	2057200	2059637	NC_015445.2	0.07	0.21	0.36	0.03	0.03	0.33	0.28	0.24	0.07	0.04	0	0	-0.747771	0.0309257	0.163439	-3.89583	1.29254e-05	0.000103806
101267771	-2.01	0.000147027	-1.16091	0.00541412	Known_gene	54469990	54476508	NC_015448.2	0.11	0.13	0.12	0.03	0.11	0.02	0.1	0.14	0.13	0.03	0.05	0	-1.16091	0.00541412	0.0266941	-2.01	0.000147027	0.00123926		K20495//long-chain fatty acid omega-monooxygenase [EC:1.14.13.205]
101267669	-5.31617	2.20411e-07	-0.309786	0.0835946	Known_gene	4692908	4693490	NC_015448.2	0.44	0.83	0.35	0.44	0.66	0.19	0.55	0.06	0.87	0	0	0	-0.309786	0.0835946	0.467349	-5.31617	2.20411e-07	1.66417e-06		K14488//SAUR family protein+ko04075//Plant hormone signal transduction
101267599	-4.50881	4.99222e-05	-1.62224	0.00196648	Known_gene	60696160	60700764	NC_015441.2	0.25	0.22	0.21	0.11	0.07	0.04	0.18	0.14	0.15	0	0	0	-1.62224	0.00196648	0.00937124	-4.50881	4.99222e-05	0.000411687
101266870	-2.04045	1.39485e-27	-0.491694	1.27692e-05	Known_gene	3390388	3395779	NC_015447.2	2.12	2.66	3.9	1.98	2.41	1.84	2.11	2.76	1.75	0.69	0.21	0.76	-0.491694	1.27692e-05	5.47527e-05	-2.04045	1.39485e-27	7.29154e-27
101266833	-2.16592	8.88702e-25	2.26312	0.00101269	Known_gene	41262079	41264398	NC_015443.2	0	0.04	0	0.14	0.03	0.03	1.28	0.88	0.88	0.23	0.2	0.26	2.26312	0.00101269	0.00474411	-2.16592	8.88702e-25	4.83153e-24		K17086//transmembrane 9 superfamily member 2/4
101266624	-2.57112	1.59068e-57	-0.944402	5.20868e-15	Known_gene	1466507	1468358	NC_015441.2	2.41	4.93	8.37	4.31	0.71	3.28	4.98	8.35	4.11	1.02	0.94	1.04	-0.944402	5.20868e-15	1.75591e-14	-2.57112	1.59068e-57	5.9865e-57
101265891	-2.10605	1.34723e-08	-0.544238	0.0497281	Known_gene	54275610	54282229	NC_015439.2	0.06	0.19	0.05	0.13	0.04	0.03	0.27	0.35	0.22	0.13	0.05	0	-0.544238	0.0497281	0.26933	-2.10605	1.34723e-08	9.79538e-08
101265794	-2.85276	2.75737e-07	-0.603131	0.0350044	Known_gene	38353113	38355099	NC_015439.2	0.25	0.15	0.12	0.16	0.12	0.04	0.37	0.12	0.2	0.07	0.02	0	-0.603131	0.0350044	0.18614	-2.85276	2.75737e-07	2.08932e-06
101265461	-4.46143	6.35747e-05	-0.694206	0.0242607	Known_gene	57798883	57800965	NC_015445.2	0.23	0.12	0.18	0.12	0.14	0.07	0.02	0.18	0.07	0	0	0	-0.694206	0.0242607	0.126768	-4.46143	6.35747e-05	0.00052674		K01590//histidine decarboxylase [EC:4.1.1.22]+ko01100//Metabolic pathways+ko00340//Histidine metabolism+ko01110//Biosynthesis of secondary metabolites
101265438	-2.25768	1.47791e-10	-0.85236	0.0020665	Known_gene	64362623	64367311	NC_015442.2	0.54	0.55	0.65	0.3	0.38	0.29	0.99	0.91	0.54	0.32	0.15	0	-0.85236	0.0020665	0.00985865	-2.25768	1.47791e-10	1.02207e-09		K10733//GINS complex subunit 2
101265272	-4.37519	9.69845e-05			Known_gene	54884368	54888299	NC_015438.2	0.02	0	0	0	0	0	0.06	0.12	0.11	0	0	0				-4.37519	9.69845e-05	0.000810081	GO:0051188//cofactor biosynthetic process;GO:0051186//cofactor metabolic process;GO:0090407//organophosphate biosynthetic process;GO:0009165//nucleotide biosynthetic process;GO:0009108//coenzyme biosynthetic process;GO:0006796//phosphate-containing compound metabolic process;GO:0071704//organic substance metabolic process;GO:0044238//primary metabolic process;GO:1901566//organonitrogen compound b…	K00278//L-aspartate oxidase [EC:1.4.3.16]+ko00250//Alanine, aspartate and glutamate metabolism+ko01100//Metabolic pathways+ko00760//Nicotinate and nicotinamide metabolism
101264789	-2.1776	9.94058e-06	0.43806	0.0268312	Known_gene	47018404	47024755	NC_015439.2	0.22	0.19	0.19	0.21	0.37	0.23	0.16	0.1	0.2	0.07	0.02	0.02	0.43806	0.0268312	0.14079	-2.1776	9.94058e-06	7.95003e-05		K08472//mlo protein;K08472//mlo protein;K08472//mlo protein
101264620	-2.0225	5.09653e-14	1.23337	0.00975583	Known_gene	62965898	62966542	NC_015441.2	0.27	0.14	0.06	0.41	0.41	0.29	1.3	5.65	0.94	0.65	0.69	0.67	1.23337	0.00975583	0.0492221	-2.0225	5.09653e-14	3.27867e-13	GO:0016020//membrane;GO:0016021//integral component of membrane;GO:0044425//membrane part;GO:0031224//intrinsic component of membrane;GO:0097159//organic cyclic compound binding;GO:0046872//metal ion binding;GO:0005488//binding;GO:0020037//heme binding;GO:0043167//ion binding;GO:0046906//tetrapyrrole binding;GO:0043169//cation binding;GO:1901363//heterocyclic compound binding;	K10534//nitrate reductase (NAD(P)H) [EC:1.7.1.1 1.7.1.2 1.7.1.3]+ko00910//Nitrogen metabolism
101264538	-2.22341	6.15704e-06	-1.06619	0.00457862	Known_gene	34140740	34146811	NC_015445.2	0.15	0.16	0.12	0.05	0.12	0.03	0.14	0.25	0.11	0.07	0.03	0	-1.06619	0.00457862	0.0224501	-2.22341	6.15704e-06	4.8862e-05		K19907//synaptotagmin-7;K19938//rabphilin-3A;K03511//DNA polymerase kappa [EC:2.7.7.7];K01652//acetolactate synthase I/II/III large subunit [EC:2.2.1.6]+ko00290//Valine, leucine and isoleucine biosynthesis+ko00770//Pantothenate and CoA biosynthesis+ko01230//Biosynthesis of amino acids+ko01100//Metabolic pathways+ko00650//Butanoate metabolism+ko01110//Biosynthesis of secondary metabolites+ko01210/…
101264425	-2.22341	0.000471553	-0.900859	8.6685e-06	Known_gene	62559767	62562828	NC_015442.2	1.51	0.5	1.26	0.25	0.78	0.76	0.14	0.16	0.15	0.03	0	0.08	-0.900859	8.6685e-06	3.69262e-05	-2.22341	0.000471553	0.00408446		K00430//peroxidase [EC:1.11.1.7]+ko01100//Metabolic pathways+ko01110//Biosynthesis of secondary metabolites+ko00940//Phenylpropanoid biosynthesis
101264049	-2.50881	0.000622953	-0.22231	0.136828	Known_gene	8593164	8598995	NC_015446.2	0.06	0.02	0.04	0	0.11	0	0.11	0	0.18	0	0.05	0	-0.22231	0.136828	0.798709	-2.50881	0.000622953	0.00544067		K16573//gamma-tubulin complex component 6;K04427//mitogen-activated protein kinase kinase kinase 7 [EC:2.7.11.25]
101263993	-2.23394	2.16818e-12	-0.796112	0.00544392	Known_gene	61796090	61798719	NC_015440.2	0.31	0.13	0.25	0.11	0.16	0.12	0.36	0.5	0.6	0.09	0.1	0.13	-0.796112	0.00544392	0.0268515	-2.23394	2.16818e-12	1.43848e-11		K01638//malate synthase [EC:2.3.3.9]+ko01100//Metabolic pathways+ko01110//Biosynthesis of secondary metabolites+ko00620//Pyruvate metabolism+ko01200//Carbon metabolism+ko00630//Glyoxylate and dicarboxylate metabolism
101263934	-2.08994	3.94324e-17	0.0407248	0.159415	Known_gene	53293880	53295823	NC_015438.2	0.12	0.05	0.07	0.05	0.18	0.02	0.53	0.9	1.09	0.15	0.2	0.27	0.0407248	0.159415	0.940462	-2.08994	3.94324e-17	2.39875e-16		K00423//L-ascorbate oxidase [EC:1.10.3.3]+ko01100//Metabolic pathways+ko00053//Ascorbate and aldarate metabolism
101263672	-2.2678	7.86051e-05	0.991815	0.00535929	Known_gene	446811	450872	NC_015440.2	0.05	0.09	0.05	0.12	0.09	0.16	0.12	0.09	0.07	0.01	0.04	0	0.991815	0.00535929	0.0264076	-2.2678	7.86051e-05	0.000654122		K10398//kinesin family member 11
101263611	-4.33193	4.25539e-07	0.192728	0.132438	Known_gene	2311953	2314758	NC_015442.2	0.05	0.08	0.02	0.1	0.03	0.03	0.21	0.06	0.1	0	0	0.02	0.192728	0.132438	0.77108	-4.33193	4.25539e-07	3.24268e-06	GO:0005488//binding;GO:1901363//heterocyclic compound binding;GO:0003676//nucleic acid binding;GO:0097159//organic cyclic compound binding;GO:0003677//DNA binding;	K09422//myb proto-oncogene protein, plant
101263295	-2.61573	0.000366411	-1.18167	0.0155119	Known_gene	64030312	64035471	NC_015449.2	0.18	0.11	0.02	0.04	0.07	0.02	0.13	0.11	0.07	0.02	0	0.03	-1.18167	0.0155119	0.0795221	-2.61573	0.000366411	0.00315346		K03147//phosphomethylpyrimidine synthase [EC:4.1.99.17]+ko01100//Metabolic pathways+ko00730//Thiamine metabolism;K00145//N-acetyl-gamma-glutamyl-phosphate reductase [EC:1.2.1.38]+ko00220//Arginine biosynthesis+ko01230//Biosynthesis of amino acids+ko01100//Metabolic pathways+ko01110//Biosynthesis of secondary metabolites+ko01210//2-Oxocarboxylic acid metabolism
101262971	-4.71526	1.5958e-05	-1.54424	0.0300953	Known_gene	61759576	61762048	NC_015447.2	0.05	0.01	0.01	0	0	0.03	0.12	0.05	0.03	0	0	0	-1.54424	0.0300953	0.158902	-4.71526	1.5958e-05	0.000128782	GO:0044267//cellular protein metabolic process;GO:0006793//phosphorus metabolic process;GO:0006807//nitrogen compound metabolic process;GO:0016310//phosphorylation;GO:0044260//cellular macromolecule metabolic process;GO:0008152//metabolic process;GO:0006796//phosphate-containing compound metabolic process;GO:0043412//macromolecule modification;GO:0009987//cellular process;GO:0043170//macromolecul…	K04733//interleukin-1 receptor-associated kinase 4 [EC:2.7.11.1]
101262947	-5.53629	3.5991e-14	-3.2812	0.00859172	Known_gene	20439498	20446887	NC_015438.2	0.03	0.03	0.08	0	0	0	0.4	0.59	0.54	0.03	0	0	-3.2812	0.00859172	0.0431431	-5.53629	3.5991e-14	2.30939e-13		K18643//katanin p80 WD40 repeat-containing subunit B1
101262376	-2.66851	1.20864e-25	0.611041	0.0113406	Known_gene	41083027	41086070	NC_015439.2	0.23	0.26	0.43	0.57	0.82	0.1	1.7	2.68	1.42	0.28	0.26	0.07	0.611041	0.0113406	0.057533	-2.66851	1.20864e-25	6.49147e-25	GO:0016788//hydrolase activity, acting on ester bonds;GO:0016787//hydrolase activity;GO:0003824//catalytic activity;	K00679//phospholipid:diacylglycerol acyltransferase [EC:2.3.1.158]+ko00561//Glycerolipid metabolism;K17604//zinc finger SWIM domain-containing protein 3;K10960//geranylgeranyl diphosphate/geranylgeranyl-bacteriochlorophyllide a reductase [EC:1.3.1.83 1.3.1.111]+ko00900//Terpenoid backbone biosynthesis+ko00860//Porphyrin and chlorophyll metabolism+ko01100//Metabolic pathways+ko01110//Biosynthesis …
101262339	-2.26123	1.3491e-27	-0.475673	0.000297008	Known_gene	5045428	5050015	NC_015446.2	0.98	1.26	1.18	1.05	0.71	0.7	0.72	1.52	1.17	0.23	0.26	0.23	-0.475673	0.000297008	0.00135046	-2.26123	1.3491e-27	7.05097e-27		K14500//BR-signaling kinase [EC:2.7.11.1]+ko04075//Plant hormone signal transduction
101262259	-2.01	0.000147027	1.31374	0.00115272	Known_gene	1081436	1085504	NC_015447.2	0.1	0.06	0.08	0.14	0.24	0.21	0.22	0.04	0.21	0.04	0.04	0.03	1.31374	0.00115272	0.00541528	-2.01	0.000147027	0.00123926		K20867//galacturonosyltransferase 12/13/14/15 [EC:2.4.1.-]
101262245	-3.80837	0.000931813	-3.76663	0.0024069	Known_gene	69140237	69141088	NC_015438.2	0.08	0.13	0.08	0	0	0	0.17	0.12	0.04	0	0	0	-3.76663	0.0024069	0.011562	-3.80837	0.000931813	0.00822548		K01870//isoleucyl-tRNA synthetase [EC:6.1.1.5]+ko00970//Aminoacyl-tRNA biosynthesis;K19027//zinc finger FYVE domain-containing protein 26;K01648//ATP citrate (pro-S)-lyase [EC:2.3.3.8]+ko00020//Citrate cycle (TCA cycle)+ko01100//Metabolic pathways+ko01110//Biosynthesis of secondary metabolites;K14440//SWI/SNF-related matrix-associated actin-dependent regulator of chromatin subfamily A-like protei…
101261963	-2.53262	5.81967e-150	-0.234282	0.00330448	Known_gene	53439	56246	NC_015447.2	3.54	2.96	4.69	3.88	2.68	3.02	7.96	10.39	8.73	1.84	1.4	1.43	-0.234282	0.00330448	0.0160055	-2.53262	5.81967e-150	1.20207e-149		K13066//caffeic acid 3-O-methyltransferase [EC:2.1.1.68]+ko01100//Metabolic pathways+ko01110//Biosynthesis of secondary metabolites+ko00940//Phenylpropanoid biosynthesis;K05279//flavonol 3-O-methyltransferase [EC:2.1.1.76]+ko00944//Flavone and flavonol biosynthesis
101261945	-2.04325	0	-0.939302	7.32781e-73	Known_gene	61141223	61146947	NC_015445.2	12.16	13.04	8.73	5.2	5.9	6.61	17.91	21.69	17.43	3.92	4.36	6	-0.939302	7.32781e-73	1.30446e-72	-2.04325	0	0	GO:0006807//nitrogen compound metabolic process;GO:0034654//nucleobase-containing compound biosynthetic process;GO:2001141//regulation of RNA biosynthetic process;GO:1903506//regulation of nucleic acid-templated transcription;GO:0050794//regulation of cellular process;GO:0044260//cellular macromolecule metabolic process;GO:0019219//regulation of nucleobase-containing compound metabolic process;GO…	K14491//two-component response regulator ARR-B family+ko04075//Plant hormone signal transduction;K14491//two-component response regulator ARR-B family+ko04075//Plant hormone signal transduction
101261755	-3.16592	3.78437e-09			Known_gene	1680755	1681730	NC_015447.2	0	0	0	0.07	0.07	0	1.01	1.36	0.61	0.23	0.08	0				-3.16592	3.78437e-09	2.71253e-08	GO:0044421//extracellular region part;GO:0005576//extracellular region;GO:0005615//extracellular space;	K03036//26S proteasome regulatory subunit N6+ko03050//Proteasome
101261752	-2.24894	1.07957e-06	-0.444702	0.0811772	Known_gene	90080022	90081782	NC_015438.2	0.06	0.09	0.27	0.06	0.03	0.23	0.28	0.37	0.56	0.03	0.1	0.13	-0.444702	0.0811772	0.453388	-2.24894	1.07957e-06	8.33325e-06		K08235//xyloglucan:xyloglucosyl transferase [EC:2.4.1.207];K04733//interleukin-1 receptor-associated kinase 4 [EC:2.7.11.1];K16219//protein N-terminal methyltransferase [EC:2.1.1.244]
101261631	-3.778	2.47456e-11	-0.521154	0.0369634	Known_gene	49070209	49073353	NC_015443.2	0.17	0.16	0.08	0.07	0.13	0.08	0.43	0.12	0.08	0.01	0	0.04	-0.521154	0.0369634	0.196944	-3.778	2.47456e-11	1.68223e-10		K04733//interleukin-1 receptor-associated kinase 4 [EC:2.7.11.1];K13199//plasminogen activator inhibitor 1 RNA-binding protein;K12663//Delta(3,5)-Delta(2,4)-dienoyl-CoA isomerase [EC:5.3.3.-]+ko04146//Peroxisome
101261195	-2.73367	2.74532e-61	-0.181668	0.041504	Known_gene	47615460	47635129	NC_015439.2	1.45	1.09	1.25	1.48	1.24	0.73	3.08	2.16	2.49	0.15	0.7	0.24	-0.181668	0.041504	0.222186	-2.73367	2.74532e-61	9.99517e-61	GO:0016020//membrane;GO:0031224//intrinsic component of membrane;GO:0044425//membrane part;GO:0016021//integral component of membrane;
101261161	-3.2755	2.67149e-34	-0.431344	0.00545706	Known_gene	87339526	87341280	NC_015438.2	0.85	1.46	1.43	0.79	1.09	0.9	1.77	1.84	2.02	0.25	0.03	0.33	-0.431344	0.00545706	0.0269178	-3.2755	2.67149e-34	1.28007e-33
101260647	-4.89583	5.17942e-06	-3.95928	0.00128634	Known_gene	3145388	3148214	NC_015443.2	0.05	0.05	0.09	0	0	0	0.1	0.21	0.1	0	0	0	-3.95928	0.00128634	0.00606037	-4.89583	5.17942e-06	4.10017e-05	GO:0045229//external encapsulating structure organization;GO:0005975//carbohydrate metabolic process;GO:0071554//cell wall organization or biogenesis;GO:0009987//cellular process;GO:0071704//organic substance metabolic process;GO:0071840//cellular component organization or biogenesis;GO:0016043//cellular component organization;GO:0008152//metabolic process;GO:0044238//primary metabolic process;GO…	K01213//galacturan 1,4-alpha-galacturonidase [EC:3.2.1.67]+ko00040//Pentose and glucuronate interconversions+ko01100//Metabolic pathways
101260553	-4.71526	1.5958e-05	-0.78935	0.0339162	Known_gene	59284088	59296494	NC_015444.2	0.07	0.01	0.07	0.03	0.01	0.05	0.07	0.03	0.05	0	0	0	-0.78935	0.0339162	0.180157	-4.71526	1.5958e-05	0.000128782		K14638//solute carrier family 15 (peptide/histidine transporter), member 3/4;K14638//solute carrier family 15 (peptide/histidine transporter), member 3/4
101260082	-2.09788	1.23782e-11	-0.482837	0.0141985	Known_gene	86177752	86180980	NC_015438.2	0.34	0.35	0.37	0.23	0.16	0.38	0.39	0.49	0.51	0.18	0.05	0.09	-0.482837	0.0141985	0.0725938	-2.09788	1.23782e-11	8.36228e-11		K02607//origin recognition complex subunit 5
101260054	-2.37454	1.69963e-233			Known_gene	26100686	26103633	NC_015443.2	0	0	0	0	0	0	6.76	8.17	10.16	0.77	2.86	1.17				-2.37454	1.69963e-233	2.48119e-233		K04733//interleukin-1 receptor-associated kinase 4 [EC:2.7.11.1]
101260040	-2.71526	0.00021438	-0.798811	0.00959375	Known_gene	896648	898642	NC_015441.2	0.31	0.6	0.26	0.17	0.38	0.11	0.21	0.07	0.26	0	0.08	0	-0.798811	0.00959375	0.0483885	-2.71526	0.00021438	0.00182061
101259946	-3.18331	3.71601e-119	0.871487	8.10368e-09	Known_gene	39465143	39466370	NC_015443.2	2.07	0.52	2.04	3.31	3.09	2.15	6.72	10.55	9.91	1.18	0.54	1.35	0.871487	8.10368e-09	3.12959e-08	-3.18331	3.71601e-119	9.07787e-119	GO:0009987//cellular process;GO:0008152//metabolic process;GO:0044237//cellular metabolic process;GO:0006796//phosphate-containing compound metabolic process;GO:0016311//dephosphorylation;GO:0006793//phosphorus metabolic process;GO:0016788//hydrolase activity, acting on ester bonds;GO:0016791//phosphatase activity;GO:0016787//hydrolase activity;GO:0003824//catalytic activity;GO:0042578//phosphori…	K13248//pyridoxal phosphate phosphatase PHOSPHO2 [EC:3.1.3.74]+ko00750//Vitamin B6 metabolism+ko01100//Metabolic pathways
101259348	-3.39333	0.000228161	-0.76663	0.00688463	Known_gene	61864670	61865731	NC_015444.2	0.56	0.5	0.31	0.1	0.4	0.31	0.03	0.1	0.28	0	0	0.05	-0.76663	0.00688463	0.0342341	-3.39333	0.000228161	0.00194225		K19038//E3 ubiquitin-protein ligase ATL41 [EC:2.3.2.27]
101258974	-3.2678	4.54738e-21	-0.645167	0.0170101	Known_gene	55578342	55580971	NC_015444.2	0.42	0.18	0.13	0.18	0.14	0.15	0.65	0.82	0.79	0.11	0.11	0	-0.645167	0.0170101	0.0876374	-3.2678	4.54738e-21	2.60547e-20		K00485//dimethylaniline monooxygenase (N-oxide forming) [EC:1.14.13.8]
101258564	-4.56326	8.16692e-14	-0.696241	0.0337471	Known_gene	47763175	47770159	NC_015443.2	0.06	0.14	0.1	0.06	0.11	0.02	0.2	0.48	0.17	0.03	0	0	-0.696241	0.0337471	0.179203	-4.56326	8.16692e-14	5.27377e-13		K02213//cell division control protein 6
101258312	-3.9783	0.000514354	1.04072	0.0262051	Known_gene	92187499	92188489	NC_015438.2	0.18	0	0.09	0	0.36	0.19	0	0.09	0.34	0	0	0	1.04072	0.0262051	0.137295	-3.9783	0.000514354	0.00446798		K14611//solute carrier family 23 (nucleobase transporter), member 1/2;K08234//glyoxylase I family protein
101258256	-3.80837	0.000931813	-0.78935	0.00414867	Known_gene	65296627	65297411	NC_015441.2	0.82	0.32	0.99	0.27	0.64	0.34	0.23	0.14	0	0	0	0	-0.78935	0.00414867	0.0202643	-3.80837	0.000931813	0.00822548		K14488//SAUR family protein+ko04075//Plant hormone signal transduction
101258179	-3.9783	7.29577e-06	-1.08127	0.00167494	Known_gene	5237864	5240578	NC_015446.2	0.29	0.17	0.16	0.03	0.17	0.09	0.17	0.1	0.04	0.02	0	0	-1.08127	0.00167494	0.00795059	-3.9783	7.29577e-06	5.80197e-05		K05909//laccase [EC:1.10.3.2]
101257777	-4.89474	3.58104e-05			Known_gene	33022740	33024643	NC_015443.2	0	0	0	0	0	0	0.08	0.08	0.16	0.01	0	0				-4.89474	3.58104e-05	0.000293366		K17604//zinc finger SWIM domain-containing protein 3
101257695	-2.43286	5.32318e-07	-0.321845	0.0940543	Known_gene	833604	837918	NC_015438.2	0	0.11	0.36	0.14	0.14	0.12	0.41	0.35	0.26	0.06	0.06	0.08	-0.321845	0.0940543	0.529654	-2.43286	5.32318e-07	4.06931e-06
101257570	-3.50881	0.000128374	1.04072	0.0419832	Known_gene	32589359	32592989	NC_015443.2	0.02	0.05	0	0.03	0.05	0.05	0.05	0.03	0.14	0	0	0.02	1.04072	0.0419832	0.225029	-3.50881	0.000128374	0.00107871		K09338//homeobox-leucine zipper protein
101257482	-3.39333	1.51167e-06	-0.544238	0.0728502	Known_gene	46706545	46709106	NC_015443.2	0.13	0.03	0.03	0.03	0.08	0.02	0.06	0.22	0.1	0.02	0.02	0	-0.544238	0.0728502	0.403715	-3.39333	1.51167e-06	1.17304e-05
101257365	-2.61573	0.000366411	-1.41871	0.00235929	Known_gene	63715802	63718397	NC_015441.2	0.42	0.16	0.12	0.1	0.07	0.1	0.13	0.19	0.14	0	0.07	0	-1.41871	0.00235929	0.0113152	-2.61573	0.000366411	0.00315346
101257156	-4.72398	4.1807e-73	-1.95928	0.00383492	Known_gene	66046483	66048856	NC_015449.2	0.04	0	0.19	0	0.02	0.04	1.15	4.72	0.66	0.08	0.02	0.16	-1.95928	0.00383492	0.0186549	-4.72398	4.1807e-73	1.38317e-72		K13692//UDP-glucose:(indol-3-yl)acetate beta-D-glucosyltransferase [EC:2.4.1.121]
101257140	-3.39333	0.000228161	-1.33779	0.0123079	Known_gene	51801825	51803841	NC_015439.2	0.05	0.09	0.15	0.05	0	0.07	0.07	0.02	0.2	0.02	0	0	-1.33779	0.0123079	0.0626226	-3.39333	0.000228161	0.00194225		K09142//uncharacterized protein
101257048	-3.80837	0.000931813	-1.95928	0.0328976	Known_gene	52068393	52069406	NC_015449.2	0.03	0.1	0	0	0	0.04	0.21	0.07	0	0	0	0	-1.95928	0.0328976	0.174421	-3.80837	0.000931813	0.00822548
101256997	-3.2678	0.000405649	0.741165	0.0456262	Known_gene	64796303	64797229	NC_015445.2	0.04	0.08	0.18	0.3	0.11	0.08	0.15	0.26	0	0	0	0.05	0.741165	0.0456262	0.245998	-3.2678	0.000405649	0.00349955
101256919	-3.01165	6.3205e-30	-0.395374	0.0258905	Known_gene	69863981	69874507	NC_015446.2	0.1	0.25	0.48	0.33	0.13	0.17	0.81	0.47	0.9	0.05	0.01	0.24	-0.395374	0.0258905	0.13554	-3.01165	6.3205e-30	3.20619e-29		K14514//ethylene-insensitive protein 3+ko04016//MAPK signaling pathway - plant+ko04075//Plant hormone signal transduction
101256873	-4.39333	8.8899e-05	-0.351593	0.0824148	Known_gene	58924335	58935915	NC_015441.2	0.21	0.22	0.13	0.11	0.27	0.06	0.19	0.13	0	0	0	0	-0.351593	0.0824148	0.460617	-4.39333	8.8899e-05	0.000741348		K14808//ATP-dependent RNA helicase DDX54/DBP10 [EC:3.6.4.13];K03549//KUP system potassium uptake protein;K17604//zinc finger SWIM domain-containing protein 3
101255922	-2.45223	1.75534e-05	-0.0795694	0.144765	Known_gene	86031246	86033667	NC_015438.2	0.14	0.16	0.14	0.07	0.24	0.11	0.22	0.2	0.04	0.02	0.02	0.05	-0.0795694	0.144765	0.848539	-2.45223	1.75534e-05	0.000141829		K10418//dynein light chain LC8-type
101255652	-4.68848	2.17505e-183	-0.0848061	0.138126	Known_gene	12996211	12997333	NC_015448.2	0.37	0.41	0.41	0.17	0.67	0.28	9.22	12.39	7.34	0.14	0.3	0.79	-0.0848061	0.138126	0.807199	-4.68848	2.17505e-183	3.87445e-183
101255648	-4.2678	0.000158996			Known_gene	51835392	51837501	NC_015439.2	0	0.02	0.07	0	0	0	0.05	0.17	0.05	0	0	0				-4.2678	0.000158996	0.00134179		K10960//geranylgeranyl diphosphate/geranylgeranyl-bacteriochlorophyllide a reductase [EC:1.3.1.83 1.3.1.111]+ko00900//Terpenoid backbone biosynthesis+ko00860//Porphyrin and chlorophyll metabolism+ko01100//Metabolic pathways+ko01110//Biosynthesis of secondary metabolites;K00679//phospholipid:diacylglycerol acyltransferase [EC:2.3.1.158]+ko00561//Glycerolipid metabolism;K01188//beta-glucosidase [EC…
101255616	-3.9783	7.29577e-06	-1.15192	0.00196978	Known_gene	59371006	59376632	NC_015445.2	0.13	0.17	0.11	0	0.16	0.03	0.1	0.08	0.06	0	0	0.02	-1.15192	0.00196978	0.00938748	-3.9783	7.29577e-06	5.80197e-05		K17756//long-chain-alcohol oxidase [EC:1.1.3.20]
101255536	-3.2678	0.000405649	0.662213	0.0128099	Known_gene	68580527	68583687	NC_015446.2	0.09	0.11	0.14	0.13	0.2	0.21	0.03	0.07	0.06	0	0.01	0	0.662213	0.0128099	0.06529	-3.2678	0.000405649	0.00349955
101255149	-5.1303	9.84696e-07	0.107839	0.138018	Known_gene	97780566	97784435	NC_015438.2	0.11	0.09	0.26	0.16	0.14	0.21	0.11	0.25	0.1	0	0	0	0.107839	0.138018	0.806412	-5.1303	9.84696e-07	7.59021e-06		K10736//minichromosome maintenance protein 10
101254998	-2.3909	5.20275e-75	-0.664935	1.75111e-13	Known_gene	1366643	1367837	NC_015442.2	7.16	7.23	5.21	2.87	4.86	4.69	7.73	8.04	3.23	1.31	1.07	1.32	-0.664935	1.75111e-13	6.08184e-13	-2.3909	5.20275e-75	1.69249e-74		K04733//interleukin-1 receptor-associated kinase 4 [EC:2.7.11.1]
101254969	-2.75323	1.70577e-13	-0.587306	0.0528648	Known_gene	33560578	33562158	NC_015439.2	0.05	0.22	0.25	0.17	0.13	0.07	1.46	0.6	0.36	0.11	0.08	0.21	-0.587306	0.0528648	0.287089	-2.75323	1.70577e-13	1.10865e-12	GO:0003700//DNA binding transcription factor activity;	K14432//ABA responsive element binding factor+ko04075//Plant hormone signal transduction;K14432//ABA responsive element binding factor+ko04075//Plant hormone signal transduction
101254936	-2.26735	6.30553e-186	-0.647589	1.68115e-07	Known_gene	46063575	46070594	NC_015446.2	1.33	1.17	1.16	0.79	0.84	0.71	7.37	6.79	5.25	1.34	1.29	1.45	-0.647589	1.68115e-07	6.75276e-07	-2.26735	6.30553e-186	1.11244e-185		K00454//lipoxygenase [EC:1.13.11.12]+ko00591//Linoleic acid metabolism+ko00592//alpha-Linolenic acid metabolism+ko01100//Metabolic pathways+ko01110//Biosynthesis of secondary metabolites
101254894	-4.1303	0.000285186	-0.544238	0.0561541	Known_gene	51229082	51229719	NC_015441.2	0.45	0.4	0.16	0.4	0.23	0.06	0.11	0.28	0.18	0	0	0	-0.544238	0.0561541	0.306465	-4.1303	0.000285186	0.00244157		K09494//T-complex protein 1 subunit beta;K14488//SAUR family protein+ko04075//Plant hormone signal transduction
101254821	-4.50881	4.99222e-05	-0.826009	0.0103609	Known_gene	61902965	61905755	NC_015445.2	0.18	0.18	0.42	0.08	0.16	0.22	0.23	0.05	0.05	0	0	0	-0.826009	0.0103609	0.0523972	-4.50881	4.99222e-05	0.000411687		K13065//shikimate O-hydroxycinnamoyltransferase [EC:2.3.1.133]+ko01100//Metabolic pathways+ko01110//Biosynthesis of secondary metabolites+ko00940//Phenylpropanoid biosynthesis+ko00941//Flavonoid biosynthesis+ko00945//Stilbenoid, diarylheptanoid and gingerol biosynthesis
101254753	-3.80837	0.000931813	-0.321845	0.114368	Known_gene	5100570	5102791	NC_015448.2	0.08	0.16	0.11	0.16	0.12	0	0.04	0.24	0.04	0	0	0	-0.321845	0.114368	0.656724	-3.80837	0.000931813	0.00822548
101254589	-4.61573	2.81898e-05	-0.998414	0.0026825	Known_gene	51293977	51295011	NC_015441.2	0.24	0.58	0.42	0.27	0.17	0.18	0.07	0.2	0.21	0	0	0	-0.998414	0.0026825	0.0129228	-4.61573	2.81898e-05	0.000229726		K09494//T-complex protein 1 subunit beta;K14488//SAUR family protein+ko04075//Plant hormone signal transduction
101254527	-3.39333	0.000228161	-3.76663	0.0024069	Known_gene	62949153	62957153	NC_015446.2	0.03	0.05	0.03	0	0	0	0	0.1	0.08	0	0.02	0	-3.76663	0.0024069	0.011562	-3.39333	0.000228161	0.00194225	GO:0046983//protein dimerization activity;GO:0005515//protein binding;GO:0005488//binding;	K13422//transcription factor MYC2+ko04016//MAPK signaling pathway - plant+ko04075//Plant hormone signal transduction;K13422//transcription factor MYC2+ko04016//MAPK signaling pathway - plant+ko04075//Plant hormone signal transduction;K13422//transcription factor MYC2+ko04016//MAPK signaling pathway - plant+ko04075//Plant hormone signal transduction
101254166	-2.61573	0.000366411	0.28465	0.0670482	Known_gene	2546286	2547025	NC_015449.2	0.1	0.88	0.83	0.82	1.12	0.26	0.1	0.38	0.21	0.05	0.05	0	0.28465	0.0670482	0.369608	-2.61573	0.000366411	0.00315346		K01051//pectinesterase [EC:3.1.1.11]+ko00040//Pentose and glucuronate interconversions+ko01100//Metabolic pathways
101254163	-2.24008	0	-0.28488	3.11109e-09	Known_gene	41143581	41157033	NC_015439.2	7.58	7.54	3.91	5.01	3.7	6.02	38.83	43.1	27.85	6.25	8.26	8.41	-0.28488	3.11109e-09	1.19113e-08	-2.24008	0	0		K04733//interleukin-1 receptor-associated kinase 4 [EC:2.7.11.1];K04733//interleukin-1 receptor-associated kinase 4 [EC:2.7.11.1];K04733//interleukin-1 receptor-associated kinase 4 [EC:2.7.11.1];K04733//interleukin-1 receptor-associated kinase 4 [EC:2.7.11.1];K04733//interleukin-1 receptor-associated kinase 4 [EC:2.7.11.1];K04733//interleukin-1 receptor-associated kinase 4 [EC:2.7.11.1];K04733//i…
101253673	-2.54534	6.14958e-05	-0.29631	0.0894584	Known_gene	66779652	66783256	NC_015440.2	0.21	0.15	0.14	0.02	0.25	0.13	0.1	0.17	0.15	0.02	0.02	0.03	-0.29631	0.0894584	0.502125	-2.54534	6.14958e-05	0.000509071		K19600//tubby-related protein 1
101253618	-5.0563	1.70656e-06	-1.95928	0.00383492	Known_gene	46663198	46665276	NC_015438.2	0.04	0.09	0.08	0	0	0.06	0.23	0.07	0.04	0	0	0	-1.95928	0.00383492	0.0186549	-5.0563	1.70656e-06	1.32675e-05		K10406//kinesin family member C2/C3
101253549	-2.46788	3.72423e-20	-0.207534	0.0207952	Known_gene	980957	984972	NC_015448.2	2.42	4.33	2.41	2.3	3.97	2.32	1.6	2.28	0.86	0.34	0.32	0.21	-0.207534	0.0207952	0.108048	-2.46788	3.72423e-20	2.16122e-19	GO:0032501//multicellular organismal process;GO:0048731//system development;GO:0048827//phyllome development;GO:0048856//anatomical structure development;GO:0099402//plant organ development;GO:0008283//cell proliferation;GO:0007389//pattern specification process;GO:0032502//developmental process;GO:0003002//regionalization;GO:0048366//leaf development;GO:0009955//adaxial/abaxial pattern specifica…
101253255	-2.29515	2.36344e-27	0.988257	4.39557e-07	Known_gene	54574084	54576563	NC_015448.2	0.26	0.36	0.32	0.9	0.25	0.72	0.92	0.68	1.38	0.26	0.2	0.13	0.988257	4.39557e-07	1.78855e-06	-2.29515	2.36344e-27	1.2394e-26		K14754//interferon-induced GTP-binding protein Mx1
101253043	-3.9783	0.000514354	-0.544238	0.0497281	Known_gene	46519443	46522221	NC_015439.2	0.13	0.1	0.11	0.02	0.07	0.16	0.03	0.03	0.09	0	0	0	-0.544238	0.0497281	0.26933	-3.9783	0.000514354	0.00446798		K00666//fatty-acyl-CoA synthase [EC:6.2.1.-];K10526//OPC-8:0 CoA ligase 1 [EC:6.2.1.-]+ko00592//alpha-Linolenic acid metabolism+ko01100//Metabolic pathways+ko01110//Biosynthesis of secondary metabolites
101252679	-2.76257	7.92277e-07	-1.07475	0.0054398	Known_gene	2202428	2209492	NC_015441.2	0.31	0.13	0.36	0.15	0.09	0.13	0.41	0.28	0.3	0.03	0.03	0.09	-1.07475	0.0054398	0.0268282	-2.76257	7.92277e-07	6.08773e-06		K10904//TIMELESS-interacting protein
101252516	-3.80837	1.72163e-08	-2.1292	0.00636493	Known_gene	2900413	2901245	NC_015438.2	0.13	0.13	0.12	0	0.04	0.05	0.64	0.34	0.41	0	0.1	0	-2.1292	0.00636493	0.0315833	-3.80837	1.72163e-08	1.25469e-07		K13434//pathogenesis-related genes transcriptional activator PTI6+ko04626//Plant-pathogen interaction
101252509	-3.71526	4.06623e-05	-0.772862	0.00253937	Known_gene	3898449	3904481	NC_015445.2	0.42	0.38	0.34	0.16	0.42	0.08	0.08	0.14	0.08	0.02	0	0	-0.772862	0.00253937	0.0122228	-3.71526	4.06623e-05	0.000333766		K20556//cytochrome P450 family 76 subfamily C;K20513//ferruginol synthase [EC:1.14.13.190]
101252231	-2.09859	3.91203e-05	-0.181668	0.12882	Known_gene	3655651	3661389	NC_015447.2	0.17	0.21	0.1	0.1	0.21	0.11	0.21	0.24	0.51	0.04	0.17	0	-0.181668	0.12882	0.748528	-2.09859	3.91203e-05	0.000320866		K08695//anthocyanidin reductase [EC:1.3.1.77]+ko01110//Biosynthesis of secondary metabolites+ko00941//Flavonoid biosynthesis
101252161	-3.46181	2.98645e-29	-0.696241	0.0622595	Known_gene	63476387	63481409	NC_015449.2	0.07	0.09	0.07	0.07	0.07	0	1.38	0.92	1.28	0.15	0.05	0.13	-0.696241	0.0622595	0.342217	-3.46181	2.98645e-29	1.52792e-28		K13065//shikimate O-hydroxycinnamoyltransferase [EC:2.3.1.133]+ko01100//Metabolic pathways+ko01110//Biosynthesis of secondary metabolites+ko00940//Phenylpropanoid biosynthesis+ko00941//Flavonoid biosynthesis+ko00945//Stilbenoid, diarylheptanoid and gingerol biosynthesis
101251674	-2.49019	2.44069e-12	-0.173869	0.0657965	Known_gene	3352078	3353203	NC_015442.2	0.99	1.5	1.27	0.83	1.06	1.48	0.72	0.83	0.88	0.23	0.1	0.09	-0.173869	0.0657965	0.362473	-2.49019	2.44069e-12	1.62143e-11
101251570	-3.18688	4.97891e-11	-0.747771	0.0309257	Known_gene	2600726	2604225	NC_015441.2	0.08	0.07	0.04	0.02	0.05	0.04	0.1	0.29	0.14	0.03	0.02	0	-0.747771	0.0309257	0.163439	-3.18688	4.97891e-11	3.40508e-10		K13428//LRR receptor-like serine/threonine-protein kinase EFR [EC:2.7.11.1]+ko04626//Plant-pathogen interaction
101251031	-2.85276	2.75737e-07	-0.123662	0.110739	Known_gene	83524820	83528664	NC_015438.2	0.74	0.66	0.59	0.62	0.69	0.53	0.66	0.22	0.16	0.13	0	0	-0.123662	0.110739	0.634818	-2.85276	2.75737e-07	2.08932e-06		K04392//Ras-related C3 botulinum toxin substrate 1+ko04145//Phagosome+ko04933//AGE-RAGE signaling pathway in diabetic complications
101250892	-2.18688	3.55169e-05	1.04072	0.0108659	Known_gene	64035413	64043140	NC_015442.2	0.07	0.02	0.09	0.13	0.13	0.11	0.25	0.22	0	0.08	0	0.02	1.04072	0.0108659	0.0550679	-2.18688	3.55169e-05	0.000290906		K00963//UTP--glucose-1-phosphate uridylyltransferase [EC:2.7.7.9]+ko00520//Amino sugar and nucleotide sugar metabolism+ko00040//Pentose and glucuronate interconversions+ko01100//Metabolic pathways+ko00052//Galactose metabolism+ko00500//Starch and sucrose metabolism
101250799	-3.80837	0.000931813	-0.374313	0.0905437	Known_gene	745452	747614	NC_015442.2	0.07	0.13	0.07	0.05	0.09	0.06	0.14	0	0	0	0	0	-0.374313	0.0905437	0.50844	-3.80837	0.000931813	0.00822548		K14638//solute carrier family 15 (peptide/histidine transporter), member 3/4
101250578	-2.22791	1.63724e-14	-0.528384	0.000349158	Known_gene	52126885	52127809	NC_015440.2	1.63	2.12	3.01	1.21	1.92	1.62	1.46	1.29	1.41	0.48	0.09	0.32	-0.528384	0.000349158	0.00159334	-2.22791	1.63724e-14	1.04445e-13
101250541	-3.39333	0.000228161			Known_gene	339421	340479	NC_015446.2	0	0	0	0	0.05	0	0.14	0.09	0.35	0	0.05	0				-3.39333	0.000228161	0.00194225
101250538	-5.0563	1.70656e-06	-0.575947	0.0417824	Known_gene	1328368	1333074	NC_015438.2	0.1	0.09	0.1	0.1	0.08	0.01	0.09	0.07	0.08	0	0	0	-0.575947	0.0417824	0.223734	-5.0563	1.70656e-06	1.32675e-05		K13412//calcium-dependent protein kinase [EC:2.7.11.1]+ko04626//Plant-pathogen interaction
101250456	-2.50881	1.05657e-05	-0.544238	0.117397	Known_gene	5571201	5576429	NC_015447.2	0.02	0	0.04	0	0	0.04	0.27	0.12	0.15	0.04	0.02	0.03	-0.544238	0.117397	0.676311	-2.50881	1.05657e-05	8.45547e-05		K19938//rabphilin-3A;K01652//acetolactate synthase I/II/III large subunit [EC:2.2.1.6]+ko00290//Valine, leucine and isoleucine biosynthesis+ko00770//Pantothenate and CoA biosynthesis+ko01230//Biosynthesis of amino acids+ko01100//Metabolic pathways+ko00650//Butanoate metabolism+ko01110//Biosynthesis of secondary metabolites+ko01210//2-Oxocarboxylic acid metabolism+ko00660//C5-Branched dibasic acid…
101250419	-3.79022	0.000988592			Known_gene	41226886	41230472	NC_015443.2	0	0	0.02	0	0	0	0.05	0.08	0	0	0	0				-3.79022	0.000988592	0.00874613	GO:0070011//peptidase activity, acting on L-amino acid peptides;GO:0003824//catalytic activity;GO:0008234//cysteine-type peptidase activity;GO:0016787//hydrolase activity;GO:0008233//peptidase activity;	K21483//salicylate 1-O-methyltransferase [EC:2.1.1.274];K08592//sentrin-specific protease 1 [EC:3.4.22.68]
101250347	-3.1303	1.39458e-05	-0.959275	0.0180873	Known_gene	98105997	98108038	NC_015438.2	0.14	0.14	0.21	0.17	0.08	0	0.14	0.25	0.18	0	0.03	0.04	-0.959275	0.0180873	0.0934511	-3.1303	1.39458e-05	0.000112146		K10960//geranylgeranyl diphosphate/geranylgeranyl-bacteriochlorophyllide a reductase [EC:1.3.1.83 1.3.1.111]+ko00900//Terpenoid backbone biosynthesis+ko00860//Porphyrin and chlorophyll metabolism+ko01100//Metabolic pathways+ko01110//Biosynthesis of secondary metabolites;K00679//phospholipid:diacylglycerol acyltransferase [EC:2.3.1.158]+ko00561//Glycerolipid metabolism;K01188//beta-glucosidase [EC…
101250033	-2.17094	2.79933e-06	-0.825258	4.8904e-05	Known_gene	59235273	59236866	NC_015444.2	0.56	0.91	0.92	0.55	0.52	0.27	0.15	0.38	0.25	0.11	0.02	0.03	-0.825258	4.8904e-05	0.000214965	-2.17094	2.79933e-06	2.19458e-05		K03189//urease accessory protein
101249857	-4.71526	1.5958e-05	-0.374313	0.109978	Known_gene	68092444	68095593	NC_015446.2	0.07	0.03	0.03	0	0.1	0	0.15	0.02	0.09	0	0	0	-0.374313	0.109978	0.629151	-4.71526	1.5958e-05	0.000128782	GO:0045735//nutrient reservoir activity;
101249810	-2.6195	6.79387e-26	-0.320237	0.0178115	Known_gene	4704	5864	NW_004194586.1	0	2.08	0.94	0.97	0.47	0.98	2.22	1.79	0	0	0.64	0	-0.320237	0.0178115	0.0919184	-2.6195	6.79387e-26	3.63694e-25	GO:0044425//membrane part;GO:0016020//membrane;GO:0016021//integral component of membrane;GO:0031224//intrinsic component of membrane;	K20367//endoplasmic reticulum-Golgi intermediate compartment protein 3
101249772	-2.06471	9.10668e-07	-0.0905197	0.142608	Known_gene	87637197	87642369	NC_015438.2	0.11	0.13	0.08	0.08	0.14	0.07	0.36	0.15	0.09	0.09	0.02	0.04	-0.0905197	0.142608	0.835229	-2.06471	9.10668e-07	7.00922e-06		K04733//interleukin-1 receptor-associated kinase 4 [EC:2.7.11.1];K13199//plasminogen activator inhibitor 1 RNA-binding protein;K11262//acetyl-CoA carboxylase / biotin carboxylase 1 [EC:6.4.1.2 6.3.4.14]+ko00640//Propanoate metabolism+ko01100//Metabolic pathways+ko01110//Biosynthesis of secondary metabolites+ko00061//Fatty acid biosynthesis+ko01212//Fatty acid metabolism+ko00620//Pyruvate metaboli…
101249688	-4.50881	4.99222e-05	1.50016	0.0114757	Known_gene	90784585	90787825	NC_015438.2	0	0.06	0.06	0.06	0.19	0.1	0.12	0.15	0.13	0	0	0	1.50016	0.0114757	0.0582529	-4.50881	4.99222e-05	0.000411687	GO:0006810//transport;GO:0051234//establishment of localization;GO:0055085//transmembrane transport;GO:0051179//localization;GO:0016021//integral component of membrane;GO:0005886//plasma membrane;GO:0071944//cell periphery;GO:0005623//cell;GO:0044464//cell part;GO:0016020//membrane;GO:0044425//membrane part;GO:0031224//intrinsic component of membrane;GO:0005215//transporter activity;GO:0022857//t…	K00801//farnesyl-diphosphate farnesyltransferase [EC:2.5.1.21]+ko00909//Sesquiterpenoid and triterpenoid biosynthesis+ko01100//Metabolic pathways+ko01110//Biosynthesis of secondary metabolites+ko00100//Steroid biosynthesis;K07874//Ras-related protein Rab-1A
101249450	-2.68284	2.16471e-05	-1.41871	0.00235929	Known_gene	63761437	63763915	NC_015440.2	0.08	0.06	0.16	0.04	0.04	0.03	0.07	0.08	0.16	0.01	0.02	0.02	-1.41871	0.00235929	0.0113152	-2.68284	2.16471e-05	0.000175388		K05681//ATP-binding cassette, subfamily G (WHITE), member 2+ko02010//ABC transporters
101248880	-2.01782	5.07215e-06	-0.752824	0.0194868	Known_gene	63280051	63281316	NC_015442.2	0.94	0.05	0.17	0	0.59	0.1	0	0.72	1	0	0.05	0.44	-0.752824	0.0194868	0.101046	-2.01782	5.07215e-06	4.01315e-05		K09422//myb proto-oncogene protein, plant
101248318	-2.2678	3.80088e-06	1.54323	0.00334775	Known_gene	2311217	2321818	NC_015445.2	0	0.01	0.06	0.12	0.04	0.07	0.03	0.23	0.18	0.03	0.04	0.02	1.54323	0.00334775	0.0162224	-2.2678	3.80088e-06	2.99196e-05
101248100	-3.80837	0.000931813			Known_gene	65170841	65172759	NC_015441.2	0	0	0	0	0	0	0.05	0.09	0	0	0	0				-3.80837	0.000931813	0.00822548		K20929//glyoxal/methylglyoxal oxidase [EC:1.2.3.15]
101248089	-2.28371	4.56341e-187	-0.0937447	0.0279139	Known_gene	62516224	62518117	NC_015440.2	6.31	4.9	8.17	6.71	4.3	7.36	11.92	8.75	10.06	2.44	2.05	1.77	-0.0937447	0.0279139	0.146731	-2.28371	4.56341e-187	8.00841e-187		K07408//cytochrome P450 family 1 subfamily A polypeptide 1 [EC:1.14.14.1]+ko00380//Tryptophan metabolism+ko01100//Metabolic pathways;K00512//steroid 17alpha-monooxygenase / 17alpha-hydroxyprogesterone deacetylase [EC:1.14.14.19 1.14.14.32]+ko01100//Metabolic pathways
101247960	-4.71526	8.48797e-09	-0.795046	1.45316e-05	Known_gene	84767454	84770347	NC_015438.2	0.73	0.87	0.88	0.39	0.72	0.32	0.14	0.11	0.3	0	0	0.02	-0.795046	1.45316e-05	6.24214e-05	-4.71526	8.48797e-09	6.13887e-08		K01051//pectinesterase [EC:3.1.1.11]+ko00040//Pentose and glucuronate interconversions+ko01100//Metabolic pathways
101247921	-2.03076	1.98186e-09	-0.815265	8.68654e-07	Known_gene	62275818	62278240	NC_015442.2	2.03	2.2	4.14	1.18	1.76	1.91	1.24	1.31	0.8	0.5	0	0.33	-0.815265	8.68654e-07	3.56918e-06	-2.03076	1.98186e-09	1.41039e-08		K03036//26S proteasome regulatory subunit N6+ko03050//Proteasome;K15889//prenylcysteine alpha-carboxyl methylesterase [EC:3.1.1.-]+ko00900//Terpenoid backbone biosynthesis
101247250	-3.50881	0.000128374	-0.165726	0.13093	Known_gene	466811	472591	NC_015446.2	0.14	0.14	0.02	0.06	0.04	0.17	0.06	0.06	0.15	0	0.02	0	-0.165726	0.13093	0.76147	-3.50881	0.000128374	0.00107871		K20279//synaptojanin [EC:3.1.3.36]+ko01100//Metabolic pathways+ko04070//Phosphatidylinositol signaling system+ko00562//Inositol phosphate metabolism;K01099//inositol polyphosphate 5-phosphatase INPP5B/F [EC:3.1.3.36]+ko01100//Metabolic pathways+ko04070//Phosphatidylinositol signaling system+ko00562//Inositol phosphate metabolism;K20279//synaptojanin [EC:3.1.3.36]+ko01100//Metabolic pathways+ko040…
101246288	-3.50881	0.000128374	-2.2812	0.00371407	Known_gene	86945268	86951977	NC_015438.2	0	0.02	0.13	0.03	0	0	0.05	0.08	0.08	0	0	0.02	-2.2812	0.00371407	0.0180506	-3.50881	0.000128374	0.00107871		K01897//long-chain acyl-CoA synthetase [EC:6.2.1.3]+ko04146//Peroxisome+ko01100//Metabolic pathways+ko00061//Fatty acid biosynthesis+ko01212//Fatty acid metabolism+ko00071//Fatty acid degradation
101246190	-3.61573	7.21714e-05	-0.554433	0.00777977	Known_gene	6939760	6941431	NC_015447.2	0.92	0.71	0.35	0.33	0.76	0.24	0.08	0.25	0.06	0	0	0.04	-0.554433	0.00777977	0.0388777	-3.61573	7.21714e-05	0.000599686		K18054//2'-deoxymugineic-acid 2'-dioxygenase / mugineic-acid 3-dioxygenase [EC:1.14.11.24 1.14.11.25]
101246179	-2.50881	6.079e-16	0.23337	0.114593	Known_gene	83357248	83357872	NC_015438.2	0.17	0.29	0.33	0.29	0.23	0.43	2.28	2.77	1.05	0.56	0.13	0.41	0.23337	0.114593	0.658109	-2.50881	6.079e-16	3.77382e-15		K07575//PUA domain protein;K01051//pectinesterase [EC:3.1.1.11]+ko00040//Pentose and glucuronate interconversions+ko01100//Metabolic pathways;K21232//molybdopterin synthase sulfur carrier subunit+ko04122//Sulfur relay system
101246143	-2.73768	1.1114e-163			Known_gene	57422920	57426379	NC_015442.2	0	0.02	0.02	0	0	0	11.35	7.15	5.3	2.14	0.53	0.8				-2.73768	1.1114e-163	2.14257e-163	GO:0006810//transport;GO:0051234//establishment of localization;GO:0051179//localization;GO:0031224//intrinsic component of membrane;GO:0016020//membrane;GO:0044425//membrane part;GO:0016021//integral component of membrane;GO:0005215//transporter activity;	K15283//solute carrier family 35, member E1
101246037	-2.39333	2.90654e-05	0.863847	0.0152761	Known_gene	65209629	65210222	NC_015449.2	0.25	0.19	0.35	0.18	0.62	0.66	0.99	0.43	0.07	0.07	0.14	0.09	0.863847	0.0152761	0.0782882	-2.39333	2.90654e-05	0.000237042
101245937	-2.37507	1.21263e-40	-0.123906	0.0553524	Known_gene	5888522	5892603	NC_015441.2	1.45	1.46	1.67	1.24	1.55	1.39	1.62	1.95	1.21	0.44	0.2	0.27	-0.123906	0.0553524	0.301832	-2.37507	1.21263e-40	5.41369e-40	GO:0050662//coenzyme binding;GO:0005488//binding;GO:0048037//cofactor binding;GO:0003824//catalytic activity;	K08695//anthocyanidin reductase [EC:1.3.1.77]+ko01110//Biosynthesis of secondary metabolites+ko00941//Flavonoid biosynthesis;K21102//anthocyanidin reductase [(2S)-flavan-3-ol-forming] [EC:1.3.1.112];K13082//bifunctional dihydroflavonol 4-reductase/flavanone 4-reductase [EC:1.1.1.219 1.1.1.234]+ko01100//Metabolic pathways+ko01110//Biosynthesis of secondary metabolites+ko00941//Flavonoid biosynthes…
101245617	-3.2678	0.000405649	1.1562	0.017849	Known_gene	53190906	53192572	NC_015439.2	0	0.05	0.1	0.15	0.15	0.03	0.05	0	0.24	0.03	0	0	1.1562	0.017849	0.0921462	-3.2678	0.000405649	0.00349955		K09422//myb proto-oncogene protein, plant
101245416	-4.39333	8.8899e-05	-0.959275	0.0104287	Known_gene	593173	598329	NC_015448.2	0.12	0.1	0.13	0.06	0.06	0.06	0.04	0.1	0.03	0	0	0	-0.959275	0.0104287	0.0527487	-4.39333	8.8899e-05	0.000741348		K20890//xylan alpha-glucuronosyltransferase [EC:2.4.1.-];K20890//xylan alpha-glucuronosyltransferase [EC:2.4.1.-]
101245313	-3.61573	7.21714e-05	0.51021	0.0598358	Known_gene	4711224	4712655	NC_015448.2	0.07	0.12	0.11	0.12	0.27	0.05	0.17	0.07	0.1	0.03	0	0	0.51021	0.0598358	0.328023	-3.61573	7.21714e-05	0.000599686		K09494//T-complex protein 1 subunit beta;K14488//SAUR family protein+ko04075//Plant hormone signal transduction
101245287	-2.19594	1.69329e-69	0.483507	5.45231e-05	Known_gene	76117238	76117770	NC_015438.2	1.67	6.68	5.76	5.78	4.49	9.88	10.9	18.77	13.26	1.78	3.62	4.51	0.483507	5.45231e-05	0.000239949	-2.19594	1.69329e-69	5.75997e-69		K03676//glutaredoxin 3
101245241	-3.39333	1.51167e-06	0.57124	0.0362256	Known_gene	64929646	64935241	NC_015449.2	0.1	0.09	0.07	0.13	0.12	0.14	0.08	0.15	0.14	0.03	0	0	0.57124	0.0362256	0.192813	-3.39333	1.51167e-06	1.17304e-05		K14638//solute carrier family 15 (peptide/histidine transporter), member 3/4
101244932	-3.71526	4.06623e-05			Known_gene	6023928	6025173	NC_015449.2	0.1	0	0	0	0	0	0.63	0.72	0.22	0	0.12	0				-3.71526	4.06623e-05	0.000333766
101244593	-2.98629	1.23347e-30	-0.483937	0.000151809	Known_gene	42033124	42034886	NC_015443.2	2.65	2.84	1.87	0.48	3.77	0.99	1.52	2.22	1.82	0.19	0.24	0.29	-0.483937	0.000151809	0.000681117	-2.98629	1.23347e-30	6.19316e-30		K04124//gibberellin 3-beta-dioxygenase [EC:1.14.11.15]+ko00904//Diterpenoid biosynthesis+ko01110//Biosynthesis of secondary metabolites;K05282//gibberellin 20-oxidase [EC:1.14.11.12]+ko00904//Diterpenoid biosynthesis+ko01100//Metabolic pathways+ko01110//Biosynthesis of secondary metabolites
101244542	-2.0563	4.57136e-14	-0.479282	0.0120476	Known_gene	578379	582819	NC_015448.2	0.69	0.49	0.4	0.38	0.38	0.38	0.89	0.69	0.87	0.31	0.16	0.09	-0.479282	0.0120476	0.0612721	-2.0563	4.57136e-14	2.93893e-13		K11643//chromodomain-helicase-DNA-binding protein 4 [EC:3.6.4.12];K11446//histone demethylase JARID1 [EC:1.14.11.-];K11643//chromodomain-helicase-DNA-binding protein 4 [EC:3.6.4.12];K11446//histone demethylase JARID1 [EC:1.14.11.-]
101244440	-4.57072	1.29344e-19	-0.515709	0.00210796	Known_gene	4707670	4708272	NC_015448.2	2.64	1.97	2.87	1.86	2.2	1.22	1.34	1.38	2.35	0.06	0	0.17	-0.515709	0.00210796	0.0100727	-4.57072	1.29344e-19	7.56962e-19		K14488//SAUR family protein+ko04075//Plant hormone signal transduction
101244272	-3.31087	6.55589e-20	0.915194	0.0138134	Known_gene	67679716	67682177	NC_015440.2	0.05	0.14	0.09	0.05	0.18	0.29	0.76	0.79	0.82	0.07	0.15	0	0.915194	0.0138134	0.0705755	-3.31087	6.55589e-20	3.81668e-19		K00801//farnesyl-diphosphate farnesyltransferase [EC:2.5.1.21]+ko00909//Sesquiterpenoid and triterpenoid biosynthesis+ko01100//Metabolic pathways+ko01110//Biosynthesis of secondary metabolites+ko00100//Steroid biosynthesis;K07874//Ras-related protein Rab-1A
101244214	-2.00548	1.26295e-13	0.997771	3.08296e-08	Known_gene	62850584	62851657	NC_015445.2	0.64	0.8	1.24	2.35	1.72	1.31	1.38	0.99	1.39	0.22	0.29	0.47	0.997771	3.08296e-08	1.21105e-07	-2.00548	1.26295e-13	8.18551e-13		K01051//pectinesterase [EC:3.1.1.11]+ko00040//Pentose and glucuronate interconversions+ko01100//Metabolic pathways
101244143	-4.59845	5.43641e-20	-0.939284	3.19675e-09	Known_gene	4706670	4707301	NC_015448.2	2.35	5.12	4.71	2.64	3.13	0.55	1.33	1.83	1.71	0.12	0.06	0	-0.939284	3.19675e-09	1.2241e-08	-4.59845	5.43641e-20	3.16157e-19		K09494//T-complex protein 1 subunit beta;K14488//SAUR family protein+ko04075//Plant hormone signal transduction
101244000	-2.08129	8.8355e-05	1.09876	0.0256433	Known_gene	2327351	2335848	NC_015443.2	0.01	0.02	0.01	0.02	0.01	0.08	0.04	0.04	0.12	0.01	0.02	0.02	1.09876	0.0256433	0.134197	-2.08129	8.8355e-05	0.000736492	GO:0006950//response to stress;GO:0006952//defense response;GO:0050896//response to stimulus;GO:0032555//purine ribonucleotide binding;GO:0032559//adenyl ribonucleotide binding;GO:0097367//carbohydrate derivative binding;GO:0000166//nucleotide binding;GO:0017076//purine nucleotide binding;GO:1901265//nucleoside phosphate binding;GO:0005488//binding;GO:0043167//ion binding;GO:1901363//heterocyclic…	K13453//disease resistance protein+ko04626//Plant-pathogen interaction;K13457//disease resistance protein RPM1+ko04626//Plant-pathogen interaction
101055581	-2.39333	2.73915e-08	-0.580764	0.00453815	Known_gene	58597833	58602041	NC_015444.2	1.31	0.63	0.49	0.53	0.66	0.31	0.5	0.62	0.33	0.18	0.05	0.04	-0.580764	0.00453815	0.0222454	-2.39333	2.73915e-08	2.00943e-07	GO:0042221//response to chemical;GO:0007154//cell communication;GO:0050896//response to stimulus;GO:0031667//response to nutrient levels;GO:0009744//response to sucrose;GO:0034285//response to disaccharide;GO:0031669//cellular response to nutrient levels;GO:0009991//response to extracellular stimulus;GO:0051716//cellular response to stimulus;GO:0009743//response to carbohydrate;GO:0009605//respon…	K07199//5'-AMP-activated protein kinase, regulatory beta subunit;K07199//5'-AMP-activated protein kinase, regulatory beta subunit
100529102	-2.10173	1.17618e-28	-0.694729	1.18752e-14	Known_gene	1040624	1049155	NC_015449.2	1.46	1.59	4.44	2.96	0.89	0.79	0.75	1.01	1.41	0.4	0.16	0.2	-0.694729	1.18752e-14	4.02679e-14	-2.10173	1.17618e-28	6.06198e-28	GO:0003824//catalytic activity;GO:0016866//intramolecular transferase activity;GO:0016853//isomerase activity;	K15813//beta-amyrin synthase [EC:5.4.99.39]+ko00909//Sesquiterpenoid and triterpenoid biosynthesis+ko01110//Biosynthesis of secondary metabolites;K15813//beta-amyrin synthase [EC:5.4.99.39]+ko00909//Sesquiterpenoid and triterpenoid biosynthesis+ko01110//Biosynthesis of secondary metabolites
100301925	-3.9783	0.000514354	-1.54424	0.0582832	Known_gene	45542187	45543949	NC_015439.2	0	0	0.05	0.02	0	0	0.06	0.04	0.08	0	0	0	-1.54424	0.0582832	0.319175	-3.9783	0.000514354	0.00446798	GO:0019222//regulation of metabolic process;GO:0051171//regulation of nitrogen compound metabolic process;GO:0071704//organic substance metabolic process;GO:0019538//protein metabolic process;GO:0050794//regulation of cellular process;GO:0031146//SCF-dependent proteasomal ubiquitin-dependent protein catabolic process;GO:0032446//protein modification by small protein conjugation;GO:2001141//regula…	K15196//transcription factor IIIB 90 kDa subunit
100191129	-5.95812	7.27023e-34	-3.54424	0.0045365	Known_gene	63622288	63624328	NC_015449.2	0	0.06	0.06	0	0	0	0.44	2.33	0.2	0	0	0.06	-3.54424	0.0045365	0.0222361	-5.95812	7.27023e-34	3.49828e-33	GO:0016740//transferase activity;GO:0016746//transferase activity, transferring acyl groups;GO:0016747//transferase activity, transferring acyl groups other than amino-acyl groups;GO:0003824//catalytic activity;	K13065//shikimate O-hydroxycinnamoyltransferase [EC:2.3.1.133]+ko01100//Metabolic pathways+ko01110//Biosynthesis of secondary metabolites+ko00940//Phenylpropanoid biosynthesis+ko00941//Flavonoid biosynthesis+ko00945//Stilbenoid, diarylheptanoid and gingerol biosynthesis
100134897	-2.20745	0	-0.266538	3.50659e-10	Known_gene	75120	89537	NW_004194395.1	8.49	14.62	8.94	10.65	7.8	8.67	52.71	49.93	55.35	10.38	13.53	10.08	-0.266538	3.50659e-10	1.3119e-09	-2.20745	0	0	GO:0006650//glycerophospholipid metabolic process;GO:0016311//dephosphorylation;GO:0044238//primary metabolic process;GO:0046856//phosphatidylinositol dephosphorylation;GO:0030258//lipid modification;GO:0044255//cellular lipid metabolic process;GO:0046486//glycerolipid metabolic process;GO:0006796//phosphate-containing compound metabolic process;GO:0006793//phosphorus metabolic process;GO:0019637…	K20279//synaptojanin [EC:3.1.3.36]+ko01100//Metabolic pathways+ko04070//Phosphatidylinositol signaling system+ko00562//Inositol phosphate metabolism;K20279//synaptojanin [EC:3.1.3.36]+ko01100//Metabolic pathways+ko04070//Phosphatidylinositol signaling system+ko00562//Inositol phosphate metabolism;K20279//synaptojanin [EC:3.1.3.36]+ko01100//Metabolic pathways+ko04070//Phosphatidylinositol signalin…
100037508	-3.0563	1.9149e-08	-0.482837	0.0550223	Known_gene	46887920	46888850	NC_015439.2	0.31	0.36	0.49	0.21	0.42	0.22	0.36	1.13	0.49	0.11	0	0.14	-0.482837	0.0550223	0.299941	-3.0563	1.9149e-08	1.39753e-07	GO:0006355//regulation of transcription, DNA-templated;GO:0065007//biological regulation;GO:0019219//regulation of nucleobase-containing compound metabolic process;GO:0051171//regulation of nitrogen compound metabolic process;GO:0031326//regulation of cellular biosynthetic process;GO:0080090//regulation of primary metabolic process;GO:0031323//regulation of cellular metabolic process;GO:0010556//…	K14432//ABA responsive element binding factor+ko04075//Plant hormone signal transduction
