# Supplementary material for: Identification of heat-tolerance QTLs and high-temperature stress-responsive genes through conventional QTL mapping, QTL-seq and RNA-seq in tomato
Source: BMC Plant Biol. 2019 Sep 11;19:398. doi: 10.1186/s12870-019-2008-3 (PMC6739936; doi:10.1186/s12870-019-2008-3)
Supplement: Supplementary file 9 — Table S9. The DEGs detected in major QTLs. (XLSX 41.6 kb) (XLSX 44 kb) [file 12870_2019_2008_MOESM9_ESM.xlsx]

## Sheet: Sheet1
Gene ID	log2(LA2093_4/LA2093_0)	Qvalue(LA2093_0-vs-LA2093_4)	log2(LA1698_4/LA1698_0)	Qvalue(LA1698_0-vs-LA1698_4)	Gene Type	Start	End	Chr	LA1698_0_1 FPKM	LA1698_0_2 FPKM	LA1698_0_3 FPKM	LA1698_4_1 FPKM	LA1698_4_2 FPKM	LA1698_4_3 FPKM	LA2093_0_1 FPKM	LA2093_0_2 FPKM	LA2093_0_3 FPKM	LA2093_4_1 FPKM	LA2093_4_2 FPKM	LA2093_4_3 FPKM	log2(LA1698_4/LA1698_0)	Qvalue(LA1698_0-vs-LA1698_4)	Pvalue(LA1698_0-vs-LA1698_4)	log2(LA2093_4/LA2093_0)	Qvalue(LA2093_0-vs-LA2093_4)	Pvalue(LA2093_0-vs-LA2093_4)	GO	Kegg Orthology
BGI_novel_G000085	5.23602	1.07019e-10	3.74116	1.04561e-20	Novel_gene	82310617	82312039	NC_015438.2	0.19	0	0.03	1.23	0.65	1.14	0	0	0.03	0.52	0.33	0.41	3.74116	1.04561e-20	3.18848e-20	5.23602	1.07019e-10	7.38052e-10
BGI_novel_G000049	5.14999	2.77596e-23	8.85547	9.73134e-46	Novel_gene	27944891	27955646	NC_015438.2	0	0	0	1.35	0.97	1.33	0	0	0.05	0.76	0.29	0.48	8.85547	9.73134e-46	2.19845e-45	5.14999	2.77596e-23	1.54109e-22	GO:0006261//DNA-dependent DNA replication;GO:0008152//metabolic process;GO:0046483//heterocycle metabolic process;GO:0006281//DNA repair;GO:0006725//cellular aromatic compound metabolic process;GO:0009987//cellular process;GO:0044238//primary metabolic process;GO:0006139//nucleobase-containing compound metabolic process;GO:0044260//cellular macromolecule metabolic process;GO:0034645//cellular mac…	K10756//replication factor C subunit 3/5+ko03420//Nucleotide excision repair+ko03030//DNA replication+ko03430//Mismatch repair
BGI_novel_G000048	3.41477	3.45124e-37	2.49738	1.25401e-28	Novel_gene	27944884	27959612	NC_015438.2	0.38	0.1	0	1.14	0.48	1.1	0.08	0.12	0.07	0.78	0.9	1.24	2.49738	1.25401e-28	3.41056e-28	3.41477	3.45124e-37	1.60063e-36		K10756//replication factor C subunit 3/5+ko03420//Nucleotide excision repair+ko03030//DNA replication+ko03430//Mismatch repair
BGI_novel_G000047	2.98584	1.98341e-65	3.31484	1.456e-99	Novel_gene	27944860	27959612	NC_015438.2	0.14	0.23	0.4	2.58	2.49	2.64	0.25	0.28	0.21	2.36	1.49	2.1	3.31484	1.456e-99	2.1459e-99	2.98584	1.98341e-65	6.9871e-65		K10756//replication factor C subunit 3/5+ko03420//Nucleotide excision repair+ko03030//DNA replication+ko03430//Mismatch repair
BGI_novel_G000044	7.65106	7.3242e-23	9.17761	1.82375e-54	Novel_gene	27198147	27201315	NC_015438.2	0	0	0	1.51	1.02	0.47	0	0	0	0.32	0.58	0.16	9.17761	1.82375e-54	3.80267e-54	7.65106	7.3242e-23	4.09032e-22		K17087//transmembrane 9 superfamily member 3;K01051//pectinesterase [EC:3.1.1.11]+ko00040//Pentose and glucuronate interconversions+ko01100//Metabolic pathways;K01537//Ca2+-transporting ATPase [EC:3.6.3.8]
BGI_novel_G000042	7.61789	1.8689e-22	8.55642	7.35729e-39	Novel_gene	24612057	24614817	NC_015438.2	0	0	0	0.83	0.86	0.57	0	0	0	0.19	0.74	0.29	8.55642	7.35729e-39	1.78249e-38	7.61789	1.8689e-22	1.05117e-21		K01051//pectinesterase [EC:3.1.1.11]+ko00040//Pentose and glucuronate interconversions+ko01100//Metabolic pathways;K17087//transmembrane 9 superfamily member 3
543944	2.41402	0	2.0336	4.309e-155	Known_gene	84851868	84856169	NC_015438.2	1.92	3.34	2.77	13.3	8.73	10.86	3.06	4.25	4.02	18.13	22.88	19.82	2.0336	4.309e-155	4.71093e-155	2.41402	0	0	GO:0006596//polyamine biosynthetic process;GO:1901605//alpha-amino acid metabolic process;GO:0009987//cellular process;GO:0034641//cellular nitrogen compound metabolic process;GO:0033388//putrescine biosynthetic process from arginine;GO:0044106//cellular amine metabolic process;GO:0042401//cellular biogenic amine biosynthetic process;GO:0044271//cellular nitrogen compound biosynthetic process;GO:…	K01476//arginase [EC:3.5.3.1]+ko00220//Arginine biosynthesis+ko00330//Arginine and proline metabolism+ko01230//Biosynthesis of amino acids+ko01100//Metabolic pathways+ko01110//Biosynthesis of secondary metabolites
543727	2.00981	9.51162e-194	3.02752	0	Known_gene	82684015	82686474	NC_015438.2	4.99	3.37	3.52	28.54	38.06	30.38	1.77	1.7	3.33	14.7	4.33	7.65	3.02752	0	0	2.00981	9.51162e-194	1.62292e-193	GO:0044238//primary metabolic process;GO:0071704//organic substance metabolic process;GO:0008152//metabolic process;GO:1901564//organonitrogen compound metabolic process;GO:0006807//nitrogen compound metabolic process;GO:0043170//macromolecule metabolic process;GO:0006508//proteolysis;GO:0019538//protein metabolic process;GO:0071944//cell periphery;GO:0044464//cell part;GO:0030312//external encap…	K04733//interleukin-1 receptor-associated kinase 4 [EC:2.7.11.1];K13199//plasminogen activator inhibitor 1 RNA-binding protein;K01183//chitinase [EC:3.2.1.14]+ko00520//Amino sugar and nucleotide sugar metabolism+ko01100//Metabolic pathways;K12663//Delta(3,5)-Delta(2,4)-dienoyl-CoA isomerase [EC:5.3.3.-]+ko04146//Peroxisome
543594	2.29811	0	2.50443	0	Known_gene	85880860	85884596	NC_015438.2	10.39	9.48	9.82	57.56	56.59	55.18	15.88	14.18	14.14	74.22	72.48	72.72	2.50443	0	0	2.29811	0	0
109119795	4.66282	5.41121e-05	9.5067	5.01706e-65	Known_gene	83592489	83593247	NC_015438.2	0	0	0	9.52	3.45	3.92	0	0	0	0.2	0.14	0.29	9.5067	5.01706e-65	9.48843e-65	4.66282	5.41121e-05	0.00044667		K13420//LRR receptor-like serine/threonine-protein kinase FLS2 [EC:2.7.11.1]+ko04626//Plant-pathogen interaction+ko04016//MAPK signaling pathway - plant;K07305//peptide-methionine (R)-S-oxide reductase [EC:1.8.4.12];K03549//KUP system potassium uptake protein;K01265//methionyl aminopeptidase [EC:3.4.11.18];K07739//elongator complex protein 3 [EC:2.3.1.48]
109119487	2.77659	2.34591e-10	4.31374	4.74713e-15	Known_gene	40369441	40370862	NC_015439.2	0.03	0.03	0.03	0.34	0.56	0.68	0.16	0.03	0.03	0.2	1.2	0.04	4.31374	4.74713e-15	1.59914e-14	2.77659	2.34591e-10	1.63024e-09		K13457//disease resistance protein RPM1+ko04626//Plant-pathogen interaction
109119486	3.51356	0.000254308	5.70407	3.37904e-08	Known_gene	40368265	40369368	NC_015439.2	0	0	0	0.28	0.13	0.41	0	0	0.03	0	0.32	0.04	5.70407	3.37904e-08	1.32856e-07	3.51356	0.000254308	0.00217128		K13457//disease resistance protein RPM1+ko04626//Plant-pathogen interaction
108348021	3.55566	3.63281e-178	2.80719	1.05503e-182	Known_gene	82688720	82691474	NC_015438.2	0.85	0.53	0.65	4.56	4.29	5.43	0.27	0.38	0.39	3.98	3.39	5	2.80719	1.05503e-182	1.02115e-182	3.55566	3.63281e-178	6.60848e-178	GO:0043170//macromolecule metabolic process;GO:0044238//primary metabolic process;GO:1901564//organonitrogen compound metabolic process;GO:0008152//metabolic process;GO:0019538//protein metabolic process;GO:0071704//organic substance metabolic process;GO:0006508//proteolysis;GO:0006807//nitrogen compound metabolic process;GO:0044464//cell part;GO:0071944//cell periphery;GO:0030312//external encap…	K04733//interleukin-1 receptor-associated kinase 4 [EC:2.7.11.1];K13199//plasminogen activator inhibitor 1 RNA-binding protein;K01183//chitinase [EC:3.2.1.14]+ko00520//Amino sugar and nucleotide sugar metabolism+ko01100//Metabolic pathways;K12663//Delta(3,5)-Delta(2,4)-dienoyl-CoA isomerase [EC:5.3.3.-]+ko04146//Peroxisome
108281121	2.9627	0	2.15139	1.38961e-225	Known_gene	40298681	40306924	NC_015439.2	2.18	2.05	2.3	9.98	6.51	9.71	1.95	2.01	2.63	14.11	16.33	17.96	2.15139	1.38961e-225	1.14821e-225	2.9627	0	0	GO:0016021//integral component of membrane;GO:0031224//intrinsic component of membrane;GO:0016020//membrane;GO:0044425//membrane part;GO:0003824//catalytic activity;GO:0016740//transferase activity;GO:0016772//transferase activity, transferring phosphorus-containing groups;GO:0016780//phosphotransferase activity, for other substituted phosphate groups;GO:0008963//phospho-N-acetylmuramoyl-pentapep…	K01000//phospho-N-acetylmuramoyl-pentapeptide-transferase [EC:2.7.8.13]+ko01502//Vancomycin resistance+ko01100//Metabolic pathways;K01000//phospho-N-acetylmuramoyl-pentapeptide-transferase [EC:2.7.8.13]+ko01502//Vancomycin resistance+ko01100//Metabolic pathways;K01000//phospho-N-acetylmuramoyl-pentapeptide-transferase [EC:2.7.8.13]+ko01502//Vancomycin resistance+ko01100//Metabolic pathways;K01000…
104649288	-2.70499	0.000308424	-4.09678	1.20775e-20	Known_gene	86165966	86171468	NC_015438.2	0.38	0.22	0.25	0.03	0.02	0	0.04	0.05	0.05	0.01	0.01	0	-4.09678	1.20775e-20	3.6869e-20	-2.70499	0.000308424	0.00264482		K08592//sentrin-specific protease 1 [EC:3.4.22.68]
104648888	3.67954	1.43497e-10	3.19511	2.87347e-14	Known_gene	83653111	83653964	NC_015438.2	0	0.07	0.24	1.18	0.45	1.24	0	0.14	0	0.63	0.22	1.12	3.19511	2.87347e-14	9.83138e-14	3.67954	1.43497e-10	9.92293e-10		K10278//F-box and leucine-rich repeat protein 12
104648672	2.81966	7.19997e-14	0.541154	0.00185043	Known_gene	82723954	82724941	NC_015438.2	1.03	0.79	1.05	1.02	1.11	2.11	0.14	0.18	0.08	1.05	1.04	0.69	0.541154	0.00185043	0.00880548	2.81966	7.19997e-14	4.64228e-13
104645451	-4.50881	4.99222e-05	-2.2812	4.22354e-05	Known_gene	83980245	83980923	NC_015438.2	0.58	0.27	0.46	0	0.11	0.17	0	0.26	0.45	0	0	0	-2.2812	4.22354e-05	0.000184955	-4.50881	4.99222e-05	0.000411687		K09286//EREBP-like factor
101268436	4.94652	1.76646e-42	3.68073	9.30605e-40	Known_gene	82989257	82990080	NC_015438.2	0.26	0.13	0.25	2.36	2.78	3.12	0.09	0.17	0	2.66	2.76	2.83	3.68073	9.30605e-40	2.23031e-39	4.94652	1.76646e-42	7.70423e-42		K04733//interleukin-1 receptor-associated kinase 4 [EC:2.7.11.1];K10739//replication factor A2+ko03440//Homologous recombination+ko03420//Nucleotide excision repair+ko03030//DNA replication+ko03430//Mismatch repair
101268250	-3.2678	1.20599e-26	-2.56227	4.46601e-47	Known_gene	40387304	40393858	NC_015439.2	1.08	1.03	1.73	0.3	0.13	0.22	0.72	0.56	0.49	0.06	0.04	0.08	-2.56227	4.46601e-47	9.97269e-47	-3.2678	1.20599e-26	6.38732e-26		K02541//DNA replication licensing factor MCM3 [EC:3.6.4.12]+ko03030//DNA replication;K02541//DNA replication licensing factor MCM3 [EC:3.6.4.12]+ko03030//DNA replication;K02541//DNA replication licensing factor MCM3 [EC:3.6.4.12]+ko03030//DNA replication
101266758	2.30711	0.000537136	0.625687	0.0887011	Known_gene	83133439	83135201	NC_015438.2	0.02	0.04	0.02	0.02	0.08	0.02	0.02	0.02	0.02	0	0.28	0	0.625687	0.0887011	0.497264	2.30711	0.000537136	0.00467033	GO:0072522//purine-containing compound biosynthetic process;GO:0072521//purine-containing compound metabolic process;GO:0046148//pigment biosynthetic process;GO:0009113//purine nucleobase biosynthetic process;GO:0018130//heterocycle biosynthetic process;GO:1901566//organonitrogen compound biosynthetic process;GO:1901360//organic cyclic compound metabolic process;GO:1901564//organonitrogen compoun…	K00764//amidophosphoribosyltransferase [EC:2.4.2.14]+ko00250//Alanine, aspartate and glutamate metabolism+ko00230//Purine metabolism+ko01100//Metabolic pathways+ko01110//Biosynthesis of secondary metabolites
101266182	-5.07425	0	-4.4827	0	Known_gene	40514965	40518255	NC_015439.2	3143.4	2501.76	1887.05	58.54	189.81	88.94	1968.14	1138.63	1014.52	51.82	16.59	58.77	-4.4827	0	0	-5.07425	0	0	GO:0009314//response to radiation;GO:0009765//photosynthesis, light harvesting;GO:0009768//photosynthesis, light harvesting in photosystem I;GO:0009416//response to light stimulus;GO:0044238//primary metabolic process;GO:0019538//protein metabolic process;GO:0071704//organic substance metabolic process;GO:0043170//macromolecule metabolic process;GO:0009628//response to abiotic stimulus;GO:0019684…	K08912//light-harvesting complex II chlorophyll a/b binding protein 1+ko01100//Metabolic pathways+ko00196//Photosynthesis - antenna proteins;K08912//light-harvesting complex II chlorophyll a/b binding protein 1+ko01100//Metabolic pathways+ko00196//Photosynthesis - antenna proteins;K08912//light-harvesting complex II chlorophyll a/b binding protein 1+ko01100//Metabolic pathways+ko00196//Photosynth…
101265863	3.30555	0	3.67322	0	Known_gene	86221232	86224475	NC_015438.2	4.19	6.38	6.66	69.43	73.46	79.03	4.96	5.32	5.28	56.12	45.16	54.6	3.67322	0	0	3.30555	0	0		K10576//ubiquitin-conjugating enzyme E2 H [EC:2.3.2.23]+ko04120//Ubiquitin mediated proteolysis
101265772	-2.65106	0	-4.83493	0	Known_gene	85410072	85419370	NC_015438.2	23.63	32.34	31.18	0.95	0.9	1.24	44.45	56.09	45.69	2.66	17.78	2.08	-4.83493	0	0	-2.65106	0	0
101265701	2.79694	0	0.307899	7.62207e-07	Known_gene	40692706	40693865	NC_015439.2	7.42	9.32	11.75	1.09	9.21	25.41	3.35	7.34	2.85	27	27.19	44.32	0.307899	7.62207e-07	3.12551e-06	2.79694	0	0	GO:0065007//biological regulation;GO:0050896//response to stimulus;GO:0023052//signaling;GO:0050794//regulation of cellular process;GO:0000160//phosphorelay signal transduction system;GO:0051716//cellular response to stimulus;GO:0007165//signal transduction;GO:0007154//cell communication;GO:0050789//regulation of biological process;GO:0009987//cellular process;GO:0035556//intracellular signal tra…	K14492//two-component response regulator ARR-A family+ko04075//Plant hormone signal transduction;K14492//two-component response regulator ARR-A family+ko04075//Plant hormone signal transduction
101265605	-2.85617	0	-3.25881	0	Known_gene	40505428	40506413	NC_015439.2	2685.59	2169.41	2091.23	148.26	430.14	146.68	2158.38	1281.83	1285.01	262.91	119.46	288.91	-3.25881	0	0	-2.85617	0	0	GO:0006091//generation of precursor metabolites and energy;GO:0009314//response to radiation;GO:0019684//photosynthesis, light reaction;GO:0006807//nitrogen compound metabolic process;GO:0071704//organic substance metabolic process;GO:0036211//protein modification process;GO:0044238//primary metabolic process;GO:0018298//protein-chromophore linkage;GO:0043170//macromolecule metabolic process;GO:0…	K08912//light-harvesting complex II chlorophyll a/b binding protein 1+ko01100//Metabolic pathways+ko00196//Photosynthesis - antenna proteins
101265477	2.01805	0	2.30609	0	Known_gene	84327727	84338401	NC_015438.2	7.53	9.91	7.36	39.22	38.31	44.23	5.88	8.84	7.93	33.6	25.53	33.61	2.30609	0	0	2.01805	0	0	GO:0006518//peptide metabolic process;GO:0006414//translational elongation;GO:0034641//cellular nitrogen compound metabolic process;GO:0044237//cellular metabolic process;GO:0070125//mitochondrial translational elongation;GO:0043043//peptide biosynthetic process;GO:1901576//organic substance biosynthetic process;GO:0071704//organic substance metabolic process;GO:0006412//translation;GO:0044249//c…	K02355//elongation factor G;K02355//elongation factor G
101265200	6.13023	9.20801e-49	5.11397	4.79127e-26	Known_gene	39631572	39644055	NC_015439.2	0	0.02	0.03	0.56	0.37	0.62	0	0.02	0.03	0.33	2.36	0.46	5.11397	4.79127e-26	1.34578e-25	6.13023	9.20801e-49	3.77813e-48
101265169	2.10183	1.67884e-15	-0.334784	0.0252244	Known_gene	85395923	85397294	NC_015438.2	1.06	0.78	0.96	0.91	0.62	0.69	0.12	0.35	0.41	1.19	1.49	1.06	-0.334784	0.0252244	0.131935	2.10183	1.67884e-15	1.05108e-14
101265167	3.51396	0	3.33801	0	Known_gene	84325972	84327489	NC_015438.2	5.64	11.58	9.62	101.83	61.97	109.7	9.99	6.8	11.52	121.95	80.4	124.61	3.33801	0	0	3.51396	0	0
101264761	2.56726	1.11182e-304	0.84995	8.6342e-41	Known_gene	86249509	86253460	NC_015438.2	5.69	8.98	7.67	15.56	10.09	13.95	2.74	3.88	5	18.66	22.01	27.8	0.84995	8.6342e-41	2.04389e-40	2.56726	1.11182e-304	1.32955e-304	GO:0046872//metal ion binding;GO:0005488//binding;GO:0043169//cation binding;GO:0008270//zinc ion binding;GO:0046914//transition metal ion binding;GO:0043167//ion binding;	K19043//E3 ubiquitin-protein ligase RHF [EC:2.3.2.27];K00469//inositol oxygenase [EC:1.13.99.1]+ko00053//Ascorbate and aldarate metabolism+ko00562//Inositol phosphate metabolism
101264759	3.53221	0	3.4426	0	Known_gene	81778820	81787512	NC_015438.2	2.71	3.34	2.6	34.54	26.29	33.71	2.56	3.05	2.58	26.45	37.58	32.15	3.4426	0	0	3.53221	0	0
101264556	4.27562	2.20575e-195	3.02964	1.92103e-68	Known_gene	85381451	85383980	NC_015438.2	0.16	0.63	0.2	1.37	1.79	4.89	0	0.35	0.7	5.99	4.27	10.46	3.02964	1.92103e-68	3.52906e-68	4.27562	2.20575e-195	3.73388e-195
101264162	4.36155	1.42345e-40	4.21636	1.56074e-57	Known_gene	86255962	86258374	NC_015438.2	0.06	0.07	0.07	1	1	1.63	0.07	0.03	0.03	0.59	0.8	1.37	4.21636	1.56074e-57	3.16373e-57	4.36155	1.42345e-40	6.36004e-40		K04733//interleukin-1 receptor-associated kinase 4 [EC:2.7.11.1];K06066//CBF1 interacting corepressor;K19589//release factor glutamine methyltransferase [EC:2.1.1.297]
101263936	2.32573	1.01298e-34	-0.681435	0.00175272	Known_gene	84285607	84298647	NC_015438.2	0.16	0.45	0.45	0.17	0.2	0.36	0.15	0.18	0.33	0.38	5.08	0.39	-0.681435	0.00175272	0.00833089	2.32573	1.01298e-34	4.83437e-34	GO:0044260//cellular macromolecule metabolic process;GO:0044237//cellular metabolic process;GO:0006974//cellular response to DNA damage stimulus;GO:0043170//macromolecule metabolic process;GO:1901360//organic cyclic compound metabolic process;GO:0033554//cellular response to stress;GO:0050896//response to stimulus;GO:0044238//primary metabolic process;GO:0006259//DNA metabolic process;GO:0090304/…	K20092//chromodomain-helicase-DNA-binding protein 1-like [EC:3.6.4.12];K20092//chromodomain-helicase-DNA-binding protein 1-like [EC:3.6.4.12]
101263845	-2.00631	7.36216e-18	-3.18534	1.17836e-115	Known_gene	81763636	81764335	NC_015438.2	6.51	11.13	15.38	0.62	0.88	2.25	2.84	2.04	3.33	0.93	0.41	0.72	-3.18534	1.17836e-115	1.57567e-115	-2.00631	7.36216e-18	4.42176e-17	GO:0044815//DNA packaging complex;GO:0043229//intracellular organelle;GO:0044422//organelle part;GO:0043232//intracellular non-membrane-bounded organelle;GO:0005622//intracellular;GO:0009536//plastid;GO:0044427//chromosomal part;GO:0000785//chromatin;GO:0005737//cytoplasm;GO:0005634//nucleus;GO:0005623//cell;GO:0044444//cytoplasmic part;GO:0044446//intracellular organelle part;GO:0043231//intrace…	K11253//histone H3
101263667	2.17976	3.92052e-93	0.660176	3.65254e-09	Known_gene	40487942	40492994	NC_015439.2	0.46	0.85	0.48	0.62	0.85	1.37	0.39	0.58	0.38	1.57	1.98	2.76	0.660176	3.65254e-09	1.40065e-08	2.17976	3.92052e-93	1.12255e-92		K13420//LRR receptor-like serine/threonine-protein kinase FLS2 [EC:2.7.11.1]+ko04626//Plant-pathogen interaction+ko04016//MAPK signaling pathway - plant
101263568	2.95918	7.34703e-78	2.39363	1.77551e-89	Known_gene	39587842	39597063	NC_015439.2	0.84	0.96	0.45	3.78	3.39	3.76	0.33	0.36	0.42	2.47	2.49	3.27	2.39363	1.77551e-89	2.80622e-89	2.95918	7.34703e-78	2.33755e-77		K14793//ribosomal RNA-processing protein 9;K14793//ribosomal RNA-processing protein 9
101263078	4.18158	2.18432e-35	2.65454	2.50243e-32	Known_gene	40549369	40550952	NC_015439.2	0.3	0.21	0.24	1.5	1.55	1.68	0.12	0.05	0.05	1.46	1.29	1.05	2.65454	2.50243e-32	6.51758e-32	4.18158	2.18432e-35	1.03522e-34
101263062	2.87788	5.0783e-63	3.49563	1.49574e-63	Known_gene	81993421	81998911	NC_015438.2	0.14	0.28	0.22	1.36	1.92	2.59	0.46	0.42	0.21	2.2	1.55	2.88	3.49563	1.49574e-63	2.86417e-63	2.87788	5.0783e-63	1.8242e-62	GO:0061458//reproductive system development;GO:0048640//negative regulation of developmental growth;GO:0046620//regulation of organ growth;GO:0051241//negative regulation of multicellular organismal process;GO:0016567//protein ubiquitination;GO:0051093//negative regulation of developmental process;GO:0048731//system development;GO:0048608//reproductive structure development;GO:0006464//cellular p…	K19045//E3 ubiquitin-protein ligase BIG BROTHER and related proteins [EC:2.3.2.27];K19045//E3 ubiquitin-protein ligase BIG BROTHER and related proteins [EC:2.3.2.27];K19045//E3 ubiquitin-protein ligase BIG BROTHER and related proteins [EC:2.3.2.27]
101262968	3.65106	0.000131291	1.52615	0.00615271	Known_gene	86093037	86098767	NC_015438.2	0.06	0.02	0.02	0.16	0.06	0.06	0	0	0.02	0.06	0.09	0.11	1.52615	0.00615271	0.0304846	3.65106	0.000131291	0.00110417
101262456	4.09852	2.00801e-60	3.28358	2.9018e-28	Known_gene	84177155	84180781	NC_015438.2	0.09	0.08	0	0.55	0.46	0.57	0.07	0.07	0.06	0.93	0.86	1.59	3.28358	2.9018e-28	7.93674e-28	4.09852	2.00801e-60	7.36585e-60		K17710//pentatricopeptide repeat domain-containing protein 1;K01176//alpha-amylase [EC:3.2.1.1]+ko01100//Metabolic pathways+ko00500//Starch and sucrose metabolism
101261746	2.35418	3.24922e-136	2.30672	3.5552e-175	Known_gene	81658551	81676058	NC_015438.2	0.88	1.09	0.66	4.12	4.74	3.8	0.45	0.81	0.8	4.03	2.91	3.51	2.30672	3.5552e-175	3.55346e-175	2.35418	3.24922e-136	7.1924e-136		K03002//DNA-directed RNA polymerase I subunit RPA2 [EC:2.7.7.6]+ko00230//Purine metabolism+ko03020//RNA polymerase+ko01100//Metabolic pathways+ko00240//Pyrimidine metabolism;K03002//DNA-directed RNA polymerase I subunit RPA2 [EC:2.7.7.6]+ko00230//Purine metabolism+ko03020//RNA polymerase+ko01100//Metabolic pathways+ko00240//Pyrimidine metabolism
101261469	2.81054	1.3069e-09	0.692801	0.0158702	Known_gene	85921189	85923863	NC_015438.2	0.1	0.23	0.19	0.2	0.36	0.3	0	0.05	0.14	0.43	0.46	0.39	0.692801	0.0158702	0.081455	2.81054	1.3069e-09	9.2423e-09		K04733//interleukin-1 receptor-associated kinase 4 [EC:2.7.11.1]
101261453	-2.3632	6.81837e-06	-2.72852	3.68176e-06	Known_gene	81644195	81650471	NC_015438.2	0.11	0.08	0.17	0.04	0	0.01	0.16	0.11	0.13	0.01	0.05	0.02	-2.72852	3.68176e-06	1.54548e-05	-2.3632	6.81837e-06	5.41667e-05		K06670//cohesin complex subunit SCC1
101261159	-2.61573	3.65264e-05	-4.1292	0.000689647	Known_gene	82851924	82852699	NC_015438.2	0.15	0.1	0.19	0	0	0	0.36	0.46	0.27	0.05	0.06	0.07	-4.1292	0.000689647	0.00320022	-2.61573	3.65264e-05	0.000299307		K14611//solute carrier family 23 (nucleobase transporter), member 1/2;K08234//glyoxylase I family protein
101260401	2.6472	5.97804e-61	4.35555	2.08734e-152	Known_gene	40372449	40375688	NC_015439.2	0.11	0.07	0.2	2.33	2.39	3.69	0.28	0.19	0.32	1.95	2.13	1.23	4.35555	2.08734e-152	2.31476e-152	2.6472	5.97804e-61	2.18361e-60	GO:0006952//defense response;GO:0006950//response to stress;GO:0050896//response to stimulus;GO:1901363//heterocyclic compound binding;GO:0036094//small molecule binding;GO:0017076//purine nucleotide binding;GO:0032553//ribonucleotide binding;GO:1901265//nucleoside phosphate binding;GO:0097159//organic cyclic compound binding;GO:0043167//ion binding;GO:0043168//anion binding;GO:0030554//adenyl nu…	K13457//disease resistance protein RPM1+ko04626//Plant-pathogen interaction;K13457//disease resistance protein RPM1+ko04626//Plant-pathogen interaction
101260108	2.42058	3.6214e-200	2.66477	3.6122e-164	Known_gene	40407733	40416305	NC_015439.2	0.29	0.37	0.22	1.93	1.64	1.99	0.41	0.59	0.53	2.77	2.22	3.32	2.66477	3.6122e-164	3.78525e-164	2.42058	3.6214e-200	6.01969e-200		K14314//nuclear pore complex protein Nup210+ko03013//RNA transport
101260082	-2.09788	1.23782e-11	-0.482837	0.0141985	Known_gene	86177752	86180980	NC_015438.2	0.34	0.35	0.37	0.23	0.16	0.38	0.39	0.49	0.51	0.18	0.05	0.09	-0.482837	0.0141985	0.0725938	-2.09788	1.23782e-11	8.36228e-11		K02607//origin recognition complex subunit 5
101259987	2.80634	1.29575e-10	0.21065	0.116598	Known_gene	85690481	85693469	NC_015438.2	0.05	0.05	0.15	0.09	0.08	0.12	0	0.03	0.1	0.3	0.39	0.2	0.21065	0.116598	0.670585	2.80634	1.29575e-10	8.95285e-10		K20495//long-chain fatty acid omega-monooxygenase [EC:1.14.13.205]
101259683	2.57927	0	2.23262	0	Known_gene	85659792	85662420	NC_015438.2	6.6	7.49	7.05	33.6	31.05	35.05	9.17	9.56	8.41	51.91	59.38	51.53	2.23262	0	0	2.57927	0	0		K20495//long-chain fatty acid omega-monooxygenase [EC:1.14.13.205];K20495//long-chain fatty acid omega-monooxygenase [EC:1.14.13.205]
101258783	3.02408	5.09487e-148	3.04866	0	Known_gene	85235706	85242861	NC_015438.2	1.66	1.07	1.01	11.05	10.83	9.05	0.62	0.53	0.47	4.03	4.56	4.7	3.04866	0	0	3.02408	5.09487e-148	1.06238e-147		K16302//metal transporter CNNM;K15449//tRNA wybutosine-synthesizing protein 1 [EC:4.1.3.44]
101258487	2.90993	8.10309e-122	2.53417	2.0581e-114	Known_gene	82726847	82740943	NC_015438.2	0.41	0.49	0.53	3.8	2.81	2.87	0.26	0.39	0.56	1.62	2.9	2.57	2.53417	2.0581e-114	2.77524e-114	2.90993	8.10309e-122	1.94427e-121	GO:0009100//glycoprotein metabolic process;GO:0071704//organic substance metabolic process;GO:0006040//amino sugar metabolic process;GO:0006139//nucleobase-containing compound metabolic process;GO:1901566//organonitrogen compound biosynthetic process;GO:0006796//phosphate-containing compound metabolic process;GO:0070085//glycosylation;GO:0044267//cellular protein metabolic process;GO:0008152//met…	K00820//glucosamine--fructose-6-phosphate aminotransferase (isomerizing) [EC:2.6.1.16]+ko00250//Alanine, aspartate and glutamate metabolism+ko00520//Amino sugar and nucleotide sugar metabolism+ko01100//Metabolic pathways;K00820//glucosamine---fructose-6-phosphate aminotransferase (isomerizing) [EC:2.6.1.16]+ko00250//Alanine, aspartate and glutamate metabolism+ko00520//Amino sugar and nucleotide s…
101258305	2.58483	4.52276e-189	2.97065	1.01986e-149	Known_gene	85741487	85746972	NC_015438.2	0.56	0.4	0.98	6.11	3.41	5.92	1.17	1.02	1.91	8.42	9.24	6.54	2.97065	1.01986e-149	1.14387e-149	2.58483	4.52276e-189	7.87151e-189		K09480//digalactosyldiacylglycerol synthase [EC:2.4.1.241]+ko01100//Metabolic pathways+ko00561//Glycerolipid metabolism
101258189	7.30015	6.62767e-19	4.2698	1.34838e-14	Known_gene	82714875	82717207	NC_015438.2	0	0.04	0	0.38	0.23	0.21	0	0	0	0.43	0.42	0.3	4.2698	1.34838e-14	4.57706e-14	7.30015	6.62767e-19	3.91886e-18		K04733//interleukin-1 receptor-associated kinase 4 [EC:2.7.11.1];K13199//plasminogen activator inhibitor 1 RNA-binding protein;K01183//chitinase [EC:3.2.1.14]+ko00520//Amino sugar and nucleotide sugar metabolism+ko01100//Metabolic pathways;K12663//Delta(3,5)-Delta(2,4)-dienoyl-CoA isomerase [EC:5.3.3.-]+ko04146//Peroxisome
101258003	2.1264	0	2.63111	0	Known_gene	85815851	85819350	NC_015438.2	6.71	6.11	5.95	33.08	46.2	37.34	8.59	10.18	8.29	33.64	40.54	46.53	2.63111	0	0	2.1264	0	0		K00288//methylenetetrahydrofolate dehydrogenase (NADP+) / methenyltetrahydrofolate cyclohydrolase / formyltetrahydrofolate synthetase [EC:1.5.1.5 3.5.4.9 6.3.4.3]+ko00670//One carbon pool by folate+ko01100//Metabolic pathways;K15710//E3 ubiquitin-protein ligase SHPRH [EC:3.6.4.- 2.3.2.27]
101257924	3.7014	0	2.33388	9.65581e-251	Known_gene	39801506	39806469	NC_015439.2	1.03	0.9	1.16	7.09	4.04	4.44	0.32	0.32	0.4	5.15	3.56	4.82	2.33388	9.65581e-251	7.41023e-251	3.7014	0	0		K04730//interleukin-1 receptor-associated kinase 1 [EC:2.7.11.1];K04733//interleukin-1 receptor-associated kinase 4 [EC:2.7.11.1];K13420//LRR receptor-like serine/threonine-protein kinase FLS2 [EC:2.7.11.1]+ko04626//Plant-pathogen interaction+ko04016//MAPK signaling pathway - plant
101257896	3.84617	1.84476e-104	0.293645	0.015211	Known_gene	82696730	82705411	NC_015438.2	0.33	0.55	0.84	1.1	0.57	0.46	0.13	0.09	0.26	1.99	1.45	3.63	0.293645	0.015211	0.0779379	3.84617	1.84476e-104	4.91625e-104	GO:0016787//hydrolase activity;GO:0008233//peptidase activity;GO:0003824//catalytic activity;GO:0004175//endopeptidase activity;GO:0008236//serine-type peptidase activity;GO:0017171//serine hydrolase activity;GO:0004252//serine-type endopeptidase activity;GO:0070011//peptidase activity, acting on L-amino acid peptides;	K04733//interleukin-1 receptor-associated kinase 4 [EC:2.7.11.1];K13199//plasminogen activator inhibitor 1 RNA-binding protein;K01183//chitinase [EC:3.2.1.14]+ko00520//Amino sugar and nucleotide sugar metabolism+ko01100//Metabolic pathways;K12663//Delta(3,5)-Delta(2,4)-dienoyl-CoA isomerase [EC:5.3.3.-]+ko04146//Peroxisome;K15333//tRNA guanosine-2'-O-methyltransferase [EC:2.1.1.34];K12619//5'-3' …
101257629	3.46262	5.10515e-98	3.36265	5.73251e-118	Known_gene	39806603	39808589	NC_015439.2	0.37	0.31	0.36	2.85	3.99	3.98	0.21	0.36	0.29	3.22	2.73	3.59	3.36265	5.73251e-118	7.58654e-118	3.46262	5.10515e-98	1.4213e-97		K17964//leucine-rich PPR motif-containing protein, mitochondrial
101256521	3.45731	3.37968e-200	2.48313	8.68071e-142	Known_gene	86240186	86247202	NC_015438.2	0.76	1	0.62	3.99	3.15	2.96	0.46	0.47	0.54	2.77	3.58	4.78	2.48313	8.68071e-142	1.00991e-141	3.45731	3.37968e-200	5.61613e-200	GO:0000003//reproduction;GO:0009856//pollination;GO:0048544//recognition of pollen;GO:0007154//cell communication;GO:0009875//pollen-pistil interaction;GO:0051704//multi-organism process;GO:0008037//cell recognition;GO:0032501//multicellular organismal process;GO:0009987//cellular process;GO:0022414//reproductive process;GO:0044706//multi-multicellular organism process;GO:0031224//intrinsic compo…	K03327//multidrug resistance protein, MATE family;K03327//multidrug resistance protein, MATE family
101255922	-2.45223	1.75534e-05	-0.0795694	0.144765	Known_gene	86031246	86033667	NC_015438.2	0.14	0.16	0.14	0.07	0.24	0.11	0.22	0.2	0.04	0.02	0.02	0.05	-0.0795694	0.144765	0.848539	-2.45223	1.75534e-05	0.000141829		K10418//dynein light chain LC8-type
101254424	-2.75271	0	-2.50903	0	Known_gene	86144849	86147820	NC_015438.2	127.29	98.66	133.77	21.29	24.18	17.95	36.18	44.84	65.5	7.97	8.55	4.68	-2.50903	0	0	-2.75271	0	0		K13508//glycerol-3-phosphate acyltransferase [EC:2.3.1.15]+ko01100//Metabolic pathways+ko01110//Biosynthesis of secondary metabolites+ko00564//Glycerophospholipid metabolism+ko00561//Glycerolipid metabolism
101254355	2.48692	4.62144e-120	2.70173	4.62774e-188	Known_gene	39989691	40004323	NC_015439.2	1.08	0.95	0.49	5.54	5.53	5.24	0.51	0.84	0.83	4.63	3.76	3.84	2.70173	4.62774e-188	4.39261e-188	2.48692	4.62144e-120	1.12347e-119		K14404//cleavage and polyadenylation specificity factor subunit 4+ko03015//mRNA surveillance pathway
101254131	2.7392	9.15594e-219	2.0881	4.53601e-165	Known_gene	82599416	82606131	NC_015438.2	0.99	1.7	1.07	6.05	4.95	4.93	0.53	1.1	0.87	5.26	5.41	6.26	2.0881	4.53601e-165	4.72712e-165	2.7392	9.15594e-219	1.40535e-218		K14554//U3 small nucleolar RNA-associated protein 21+ko03008//Ribosome biogenesis in eukaryotes
101254055	-2.79022	6.08451e-14	-2.54424	3.82929e-12	Known_gene	39040908	39043705	NC_015439.2	0.96	1.06	0.96	0.17	0.17	0.18	1.22	1.12	1.02	0.22	0.24	0	-2.54424	3.82929e-12	1.36934e-11	-2.79022	6.08451e-14	3.91992e-13		K10745//ribonuclease H2 subunit C+ko03030//DNA replication
101253448	2.61416	6.21525e-92	2.37893	1.15771e-224	Known_gene	40054898	40060302	NC_015439.2	2.1	1.84	1.35	10.63	8.16	8.93	0.32	0.43	1.04	3.41	3.52	4.03	2.37893	1.15771e-224	9.5914e-225	2.61416	6.21525e-92	1.79053e-91	GO:0015711//organic anion transport;GO:0071705//nitrogen compound transport;GO:0003333//amino acid transmembrane transport;GO:0006810//transport;GO:0098656//anion transmembrane transport;GO:1903825//organic acid transmembrane transport;GO:0034220//ion transmembrane transport;GO:0051234//establishment of localization;GO:0046942//carboxylic acid transport;GO:0015849//organic acid transport;GO:00717…	K03294//basic amino acid/polyamine antiporter, APA family
101252525	2.12546	1.53271e-69	3.79048	5.95451e-203	Known_gene	84976120	84982451	NC_015438.2	0.6	0.57	0.77	8.8	9.83	8.1	1.51	1.17	1.27	8.32	2.84	6.71	3.79048	5.95451e-203	5.35562e-203	2.12546	1.53271e-69	5.21213e-69	GO:0019752//carboxylic acid metabolic process;GO:0071704//organic substance metabolic process;GO:0044237//cellular metabolic process;GO:0044281//small molecule metabolic process;GO:0006725//cellular aromatic compound metabolic process;GO:1901360//organic cyclic compound metabolic process;GO:0009072//aromatic amino acid family metabolic process;GO:0006807//nitrogen compound metabolic process;GO:00…	K01800//maleylacetoacetate isomerase [EC:5.2.1.2]+ko00350//Tyrosine metabolism+ko01100//Metabolic pathways;K01800//maleylacetoacetate isomerase [EC:5.2.1.2]+ko00350//Tyrosine metabolism+ko01100//Metabolic pathways;K01800//maleylacetoacetate isomerase [EC:5.2.1.2]+ko00350//Tyrosine metabolism+ko01100//Metabolic pathways
101251936	4.71519	5.47485e-08	3.36265	0.00765004	Known_gene	84492594	84496054	NC_015438.2	0	0	0	0.02	0	0.04	0	0.01	0	0.08	0.24	0	3.36265	0.00765004	0.0382168	4.71519	5.47485e-08	4.04892e-07		K12447//UDP-sugar pyrophosphorylase [EC:2.7.7.64]+ko00520//Amino sugar and nucleotide sugar metabolism+ko00040//Pentose and glucuronate interconversions+ko01100//Metabolic pathways+ko00052//Galactose metabolism+ko00053//Ascorbate and aldarate metabolism;K01528//dynamin GTPase [EC:3.6.5.5]+ko04144//Endocytosis;K03549//KUP system potassium uptake protein
101251744	2.76923	0	2.58733	0	Known_gene	39063879	39067576	NC_015439.2	16.23	14.14	17.03	101.39	80.22	105.41	7.54	10.86	10.71	63.11	75.75	59.76	2.58733	0	0	2.76923	0	0	GO:0006807//nitrogen compound metabolic process;GO:0043170//macromolecule metabolic process;GO:0071704//organic substance metabolic process;GO:0065009//regulation of molecular function;GO:0065007//biological regulation;GO:0008152//metabolic process;GO:1901564//organonitrogen compound metabolic process;GO:0006508//proteolysis;GO:0019538//protein metabolic process;GO:0044238//primary metabolic proc…	K01363//cathepsin B [EC:3.4.22.1];K01363//cathepsin B [EC:3.4.22.1]
101251441	2.17482	0	2.34314	9.1062e-173	Known_gene	39073750	39082094	NC_015439.2	1.65	1.2	1.97	7.56	8.75	8.39	4.35	4.31	4.5	18.72	23.71	17.18	2.34314	9.1062e-173	9.17937e-173	2.17482	0	0	GO:0043227//membrane-bounded organelle;GO:0043226//organelle;GO:0005737//cytoplasm;GO:0005623//cell;GO:0043229//intracellular organelle;GO:0044464//cell part;GO:0005634//nucleus;GO:0044424//intracellular part;GO:0043231//intracellular membrane-bounded organelle;GO:0005622//intracellular;GO:0046872//metal ion binding;GO:0008270//zinc ion binding;GO:0043167//ion binding;GO:0046914//transition metal…	K06874//zinc finger protein;K06874//zinc finger protein;K06874//zinc finger protein;K06874//zinc finger protein
101251043	3.73595	6.28584e-10	-0.0967787	0.149501	Known_gene	84195901	84198818	NC_015438.2	0.1	0.03	0.14	0.02	0.05	0.18	0	0	0.08	0.26	0.42	0.34	-0.0967787	0.149501	0.877906	3.73595	6.28584e-10	4.4118e-09		K09422//myb proto-oncogene protein, plant
101251031	-2.85276	2.75737e-07	-0.123662	0.110739	Known_gene	83524820	83528664	NC_015438.2	0.74	0.66	0.59	0.62	0.69	0.53	0.66	0.22	0.16	0.13	0	0	-0.123662	0.110739	0.634818	-2.85276	2.75737e-07	2.08932e-06		K04392//Ras-related C3 botulinum toxin substrate 1+ko04145//Phagosome+ko04933//AGE-RAGE signaling pathway in diabetic complications
101250749	2.2768	3.22021e-23	2.54642	4.67293e-45	Known_gene	84167077	84170857	NC_015438.2	0.15	0.16	0.15	1.12	0.62	0.96	0.1	0.08	0.16	0.39	0.7	0.54	2.54642	4.67293e-45	1.06134e-44	2.2768	3.22021e-23	1.79071e-22		K15032//mTERF domain-containing protein, mitochondrial
101250736	4.23427	1.01558e-97	2.05821	1.64736e-20	Known_gene	84906306	84909614	NC_015438.2	0.25	0.15	0.16	0.63	1.16	0.52	0.18	0.07	0.1	2.86	1.37	2.38	2.05821	1.64736e-20	5.03979e-20	4.23427	1.01558e-97	2.83112e-97		K04733//interleukin-1 receptor-associated kinase 4 [EC:2.7.11.1]
101250733	-2.42728	9.42343e-08	-2.91863	2.19965e-13	Known_gene	82445065	82451992	NC_015438.2	0.17	0.12	0.19	0.03	0.02	0.01	0.15	0.05	0.11	0.03	0.02	0.01	-2.91863	2.19965e-13	7.65722e-13	-2.42728	9.42343e-08	7.02081e-07		K03164//DNA topoisomerase II [EC:5.99.1.3];K03164//DNA topoisomerase II [EC:5.99.1.3]
101250361	2.16291	1.10131e-137	2.14506	2.38419e-206	Known_gene	40128628	40136764	NC_015439.2	1.37	1.47	1.91	8.18	7.12	5.73	0.98	1.03	1.34	5.14	4.51	5.46	2.14506	2.38419e-206	2.11686e-206	2.16291	1.10131e-137	2.42017e-137		K20843//hydroxyproline O-galactosyltransferase 2/3/4/5/6 [EC:2.4.1.-]
101250169	2.81966	7.19997e-14	2.25574	3.36437e-10	Known_gene	84083204	84085157	NC_015438.2	0.12	0.07	0.05	0.45	0.46	0.24	0.05	0.07	0.07	0.39	0.8	0.14	2.25574	3.36437e-10	1.25785e-09	2.81966	7.19997e-14	4.64228e-13		K01074//palmitoyl-protein thioesterase [EC:3.1.2.22]+ko01100//Metabolic pathways+ko00062//Fatty acid elongation+ko01212//Fatty acid metabolism;K19589//release factor glutamine methyltransferase [EC:2.1.1.297];K19090//CRISPR-associated protein Cas5t;K15271//ATP-dependent DNA helicase HFM1/MER3 [EC:3.6.4.12]
101249959	3.00434	0	2.17968	0	Known_gene	82428219	82435259	NC_015438.2	6.86	7.22	9.63	31.58	29.72	42.91	5.81	7.35	7.6	55.45	58.45	53.66	2.17968	0	0	3.00434	0	0	GO:0032501//multicellular organismal process;GO:0048367//shoot system development;GO:0006457//protein folding;GO:0048856//anatomical structure development;GO:0007275//multicellular organism development;GO:0032502//developmental process;GO:0048366//leaf development;GO:0048731//system development;GO:0009987//cellular process;GO:0048827//phyllome development;GO:0099402//plant organ development;GO:00…	K09571//FK506-binding protein 4/5 [EC:5.2.1.8];K09574//FK506-binding protein 8 [EC:5.2.1.8];K09571//FK506-binding protein 4/5 [EC:5.2.1.8]
101249426	-2.21209	1.19543e-16	-3.11177	4.52428e-58	Known_gene	39188087	39190223	NC_015439.2	2.47	1.89	2.92	0.22	0.34	0.29	0.66	0.81	1.48	0.17	0.28	0.19	-3.11177	4.52428e-58	9.12252e-58	-2.21209	1.19543e-16	7.33269e-16		K00083//cinnamyl-alcohol dehydrogenase [EC:1.1.1.195]+ko01100//Metabolic pathways+ko01110//Biosynthesis of secondary metabolites+ko00940//Phenylpropanoid biosynthesis
101248517	2.67276	6.73268e-98	3.14473	1.35918e-156	Known_gene	84798641	84813067	NC_015438.2	0.78	0.65	0.79	4.66	3.78	4.36	0.86	0.58	0.67	3.66	4.26	4.05	3.14473	1.35918e-156	1.47213e-156	2.67276	6.73268e-98	1.87581e-97	GO:0044085//cellular component biogenesis;GO:0016043//cellular component organization;GO:0007021//tubulin complex assembly;GO:0043623//cellular protein complex assembly;GO:0070271//protein complex biogenesis;GO:0022607//cellular component assembly;GO:0007023//post-chaperonin tubulin folding pathway;GO:0043933//macromolecular complex subunit organization;GO:0009987//cellular process;GO:0006457//pr…	K21767//tubulin-specific chaperone D
101247960	-4.71526	8.48797e-09	-0.795046	1.45316e-05	Known_gene	84767454	84770347	NC_015438.2	0.73	0.87	0.88	0.39	0.72	0.32	0.14	0.11	0.3	0	0	0.02	-0.795046	1.45316e-05	6.24214e-05	-4.71526	8.48797e-09	6.13887e-08		K01051//pectinesterase [EC:3.1.1.11]+ko00040//Pentose and glucuronate interconversions+ko01100//Metabolic pathways
101247868	4.32091	1.25244e-10	3.01035	3.94971e-10	Known_gene	83725781	83727963	NC_015438.2	0.14	0.07	0	0.6	0.82	0.26	0	0	0.08	0.23	0.36	0.99	3.01035	3.94971e-10	1.4793e-09	4.32091	1.25244e-10	8.64975e-10
101246472	4.89207	1.57118e-05	0.84808	0.061701	Known_gene	84701867	84703789	NC_015438.2	0.07	0.02	0	0.02	0.09	0.05	0	0	0	0.07	0.07	0.21	0.84808	0.061701	0.338961	4.89207	1.57118e-05	0.000126721
101246179	-2.50881	6.079e-16	0.23337	0.114593	Known_gene	83357248	83357872	NC_015438.2	0.17	0.29	0.33	0.29	0.23	0.43	2.28	2.77	1.05	0.56	0.13	0.41	0.23337	0.114593	0.658109	-2.50881	6.079e-16	3.77382e-15		K07575//PUA domain protein;K01051//pectinesterase [EC:3.1.1.11]+ko00040//Pentose and glucuronate interconversions+ko01100//Metabolic pathways;K21232//molybdopterin synthase sulfur carrier subunit+ko04122//Sulfur relay system
101245696	-3.1303	4.15267e-17	-2.2812	1.53115e-12	Known_gene	82083611	82091175	NC_015438.2	0.29	0.53	0.6	0.1	0.09	0.11	0.49	0.71	0.34	0.09	0.08	0	-2.2812	1.53115e-12	5.42944e-12	-3.1303	4.15267e-17	2.5268e-16		K20456//oxysterol-binding protein 1
101245586	-2.49146	0	-3.2418	0	Known_gene	84676551	84677198	NC_015438.2	542.43	460.71	441.73	27.03	89.17	37.08	393.8	276.22	238.15	64.14	27.29	76.77	-3.2418	0	0	-2.49146	0	0		K02883//large subunit ribosomal protein L18e+ko03010//Ribosome;K11855//ubiquitin carboxyl-terminal hydrolase 36/42 [EC:3.4.19.12]
101244831	3.13635	0	2.68574	0	Known_gene	39357642	39360826	NC_015439.2	10.33	17.2	24.67	117.95	151.02	95.78	10.51	16.16	16.29	134.6	96.47	164.46	2.68574	0	0	3.13635	0	0	GO:0008152//metabolic process;GO:0055114//oxidation-reduction process;GO:0044425//membrane part;GO:0016021//integral component of membrane;GO:0031224//intrinsic component of membrane;GO:0016020//membrane;GO:0003824//catalytic activity;GO:0036094//small molecule binding;GO:0043167//ion binding;GO:1901265//nucleoside phosphate binding;GO:0097159//organic cyclic compound binding;GO:0005488//binding;…	K09828//Delta24-sterol reductase [EC:1.3.1.72 1.3.1.-]+ko01100//Metabolic pathways+ko01110//Biosynthesis of secondary metabolites+ko00100//Steroid biosynthesis
101243929	4.3358	8.62432e-142	2.9122	6.31719e-41	Known_gene	82011207	82019571	NC_015438.2	0.22	0.21	0.1	1.21	1.01	1.55	0.13	0.24	0.16	1.62	8.11	1.05	2.9122	6.31719e-41	1.4935e-40	4.3358	8.62432e-142	1.8537e-141	GO:0051234//establishment of localization;GO:0055085//transmembrane transport;GO:0051179//localization;GO:0006810//transport;GO:0043226//organelle;GO:0005739//mitochondrion;GO:0031966//mitochondrial membrane;GO:0044425//membrane part;GO:0005740//mitochondrial envelope;GO:0005623//cell;GO:0043229//intracellular organelle;GO:0044424//intracellular part;GO:0044444//cytoplasmic part;GO:0016020//membr…	K05863//solute carrier family 25 (mitochondrial adenine nucleotide translocator), member 4/5/6/31;K05863//solute carrier family 25 (mitochondrial adenine nucleotide translocator), member 4/5/6/31;K05863//solute carrier family 25 (mitochondrial adenine nucleotide translocator), member 4/5/6/31
101243856	2.74622	1.78338e-48	2.59946	5.61635e-34	Known_gene	40363748	40367979	NC_015439.2	0.06	0.11	0.19	0.65	0.53	1.03	0.11	0.2	0.18	1.21	0.98	1.06	2.59946	5.61635e-34	1.43545e-33	2.74622	1.78338e-48	7.33583e-48		K17710//pentatricopeptide repeat domain-containing protein 1;K17710//pentatricopeptide repeat domain-containing protein 1;K19090//CRISPR-associated protein Cas5t
101055518	2.84728	0	3.1625	0	Known_gene	40119469	40127445	NC_015439.2	4.22	3.77	3.96	36.44	45.85	33.57	4.61	6.4	4.19	44.84	31	37.77	3.1625	0	0	2.84728	0	0	GO:0010468//regulation of gene expression;GO:0050789//regulation of biological process;GO:0031328//positive regulation of cellular biosynthetic process;GO:0019219//regulation of nucleobase-containing compound metabolic process;GO:0010467//gene expression;GO:0048518//positive regulation of biological process;GO:0044260//cellular macromolecule metabolic process;GO:0023056//positive regulation of si…
100301908	2.02733	0	0.970986	0	Known_gene	81873594	81875176	NC_015438.2	56.7	81.37	63.6	45.05	133.06	223.8	54.57	60.63	70.59	214.42	278.75	273.15	0.970986	0	0	2.02733	0	0	GO:1901363//heterocyclic compound binding;GO:0005488//binding;GO:0003676//nucleic acid binding;GO:0043169//cation binding;GO:0097159//organic cyclic compound binding;GO:0003677//DNA binding;GO:0043167//ion binding;GO:0046914//transition metal ion binding;GO:0046872//metal ion binding;GO:0008270//zinc ion binding;
25 highly expressed genes were marked with red colored
